# Supplementary material for: Plasma Proteomic Changes of Atherosclerosis after Exercise in ApoE Knockout Mice
Source: MDPI journal article supplement (doi:10.3390/biology11020253), 2022-02-06
Supplement: s1 [file s1]

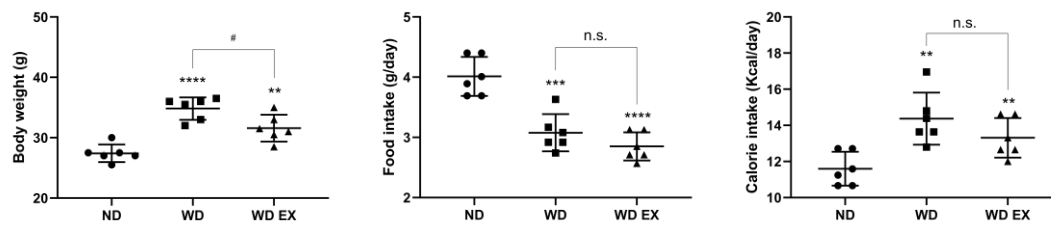

**Figure S1.** Effects of exercise on body weight, food intake and calorie intake in ApoE<sup>-/-</sup> mice. The one-way ANOVA followed by Tukey's post hoc test was used for statistical analysis, and \*\*  $p < 0.01$ , \*\*\*  $p < 0.001$ , and \*\*\*\*  $p < 0.0001$  represents the significance between ND and WD groups or ND and WD EX groups. #  $p < 0.05$  represents the significance between WD and WD EX groups. n.s. = No significant difference.

Table S1. Effects of exercise on the biofunction pathway regulated by proteins between WD and WD EX groups

| Ingenuity Canonical Pathways                                                                                                                   | -log ( <i>p</i> value) | Activation z-score | Molecules                                                                                                                                                                    |
|------------------------------------------------------------------------------------------------------------------------------------------------|------------------------|--------------------|------------------------------------------------------------------------------------------------------------------------------------------------------------------------------|
| Cardiovascular Disease, Hematological Disease, Organismal Injury and Abnormalities                                                             | 15.4763                | 0.5450             | C2, C5, CFB, CFH, CRP, F12, F5, FGG, HABP2, MYOCD, PPIA, PRDX2, PROS1, PROZ, SERPINA10                                                                                       |
| Inflammatory Disease                                                                                                                           | 13.3585                |                    | ACE, AHSG, APOA1, APOM, BHMT, C2, C5, CAMP, CFB, CFH, CRP, F5, HLA-A, HP, HSPA5, HSPA8, IGF1, LAP3, LBP, LCP1, LTF, NRP1, PKM, PPIA, PRDX2, Serpina3g (includes others)      |
| Infectious Diseases                                                                                                                            | 13.3363                |                    | AHSG, APOA1, APOM, C5, CFB, CRP, F5, HSPA5, ITIH3, ITIH4, PKM, PPIA                                                                                                          |
| Inflammatory Response                                                                                                                          | 12.7100                | -2.1090            | ACE, AHSG, APOA1, C5, CAMP, CFH, CRP, F12, FGG, HLA-A, HP, IGF1, LBP, LCP1, LTF, MST1, Orm1 (includes others), PGLYRP2, PPIA, PROS1, Retnlg, SERPINF1                        |
| Cell-To-Cell Signaling and Interaction, Hematological System Development and Function, Immune Cell Trafficking, Inflammatory Response          | 12.5214                | -2.2740            | ACE, APOA1, C5, CAMP, CFH, CRP, F5, FGG, HLA-A, IGF1, LBP, LTF, Orm1 (includes others), PPIA, PROS1, SERPINF1                                                                |
| Inflammatory Response                                                                                                                          | 12.2161                | 1.2480             | ACE, AMBP, APOA1, APOM, C5, CAMP, CFB, CFH, CRP, F12, F5, HLA-A, HP, HPX, HSPA5, IGF1, LBP, LTF, MST1, PGLYRP2, PKM, PPIA, PRDX2, PROS1, Retnlg, Serpina3g (includes others) |
| Connective Tissue Disorders, Inflammatory Disease, Inflammatory Response, Organismal Injury and Abnormalities, Skeletal and Muscular Disorders | 12.1512                | -1.2430            | AHSG, APOA1, APOM, BHMT, C2, C5, CFB, CRP, FGG, HLA-A, HP, HSPA5, HSPA8, IGF1, LAP3, LBP, LCP1, LTF, NRP1, PGLYRP2, PKM, PPIA, PRDX2                                         |
| Inflammatory Response                                                                                                                          | 12.0752                | 1.5490             | ACE, AMBP, APOA1, C5, CAMP, CFB, CFH, CRP, F5, HLA-A, HP, HPX, HSPA5, IGF1, LBP, LTF, MST1, PGLYRP2, PKM, PPIA, PRDX2, PROS1, Retnlg, Serpina3g (includes others)            |

Table S1. *Cont.*

| Ingenuity Canonical Pathways                                                                                                                                          | -log ( <i>p</i><br>value) | Activation<br>z-score | Molecules                                                                                                                                                                    |
|-----------------------------------------------------------------------------------------------------------------------------------------------------------------------|---------------------------|-----------------------|------------------------------------------------------------------------------------------------------------------------------------------------------------------------------|
| Metabolic Disease, Organismal Injury and Abnormalities                                                                                                                | 12.0640                   |                       | ACE, AHSG, ALDOB, AMBP, APOA1, APOM, BHMT, C2, C5, C8G, C9, CFB, CFH, COL24A1, CRP, HABP2, HLA-A, HP, HSPA5, IGF1, ITIH4, LBP, LCP1, LTF, PKM, PM20D1, PPIA, PRDX2, SERPINF1 |
| Cell-To-Cell Signaling and Interaction, Hematological System Development and Function                                                                                 | 11.9318                   | -2.3830               | ACE, C5, CAMP, CFH, CRP, F5, FGG, HLA-A, IGF1, LBP, LTF, Orm1 (includes others), PPIA, PROS1, SERPINF1                                                                       |
| Connective Tissue Disorders, Inflammatory Disease, Organismal Injury and Abnormalities, Skeletal and Muscular Disorders                                               | 11.2464                   | -0.9170               | AHSG, APOA1, APOM, BHMT, C2, C5, CAMP, CFB, CFH, CRP, FGG, HLA-A, HP, HSPA5, HSPA8, IGF1, LAP3, LBP, LCP1, LTF, NRP1, PGLYRP2, PKM, PPIA, PRDX2                              |
| Endocrine System Disorders, Gastrointestinal Disease, Metabolic Disease, Organismal Injury and Abnormalities                                                          | 11.1765                   |                       | ACE, AHSG, ALDOB, AMBP, APOA1, APOM, BHMT, C2, C5, C8G, C9, CFB, CFH, COL24A1, CRP, HABP2, HLA-A, HP, HSPA5, IGF1, ITIH4, LCP1, PKM, PM20D1, PPIA, SERPINF1                  |
| Cellular Compromise, Inflammatory Response                                                                                                                            | 11.0405                   |                       | AHSG, APOA1, C5, CAMP, DYNC1H1, F5, FGG, HP, HSPA8, IGF1, ITIH3, ITIH4, LTF, PKM, PPIA, PROS1, PSAP                                                                          |
| Connective Tissue Disorders, Immunological Disease, Inflammatory Disease, Inflammatory Response, Organismal Injury and Abnormalities, Skeletal and Muscular Disorders | 10.9431                   |                       | AHSG, APOA1, APOM, BHMT, C2, C5, CFB, CRP, HLA-A, HP, HSPA8, IGF1, LAP3, LBP, LCP1, LTF, NRP1, PPIA, PRDX2                                                                   |
| Cell-To-Cell Signaling and Interaction, Hematological System Development and Function, Immune Cell Trafficking, Inflammatory Response                                 | 10.9172                   | -2.2270               | ACE, APOA1, C5, CAMP, CFH, CRP, F5, FGG, HLA-A, HPX, IGF1, LBP, LTF, Orm1 (includes others), PGLYRP2, PPIA, PROS1, PSAP, SERPINF1                                            |
| Immunological Disease, Inflammatory Disease                                                                                                                           | 10.7496                   |                       | ACE, AHSG, APOA1, APOM, BHMT, C2, C5, CAMP, CFB, CFH, CRP, HLA-A, HP, HPX, HSPA5, HSPA8, IGF1, LAP3, LBP, LCP1, LTF, NRP1, PPIA, PRDX2, PSAP                                 |

Table S1. *Cont.*

| Ingenuity Canonical Pathways                                                                                                                      | -log ( <i>p</i><br>value) | Activation<br>z-score | Molecules                                                                                                                                                                             |
|---------------------------------------------------------------------------------------------------------------------------------------------------|---------------------------|-----------------------|---------------------------------------------------------------------------------------------------------------------------------------------------------------------------------------|
| Inflammatory Response,<br>Organismal Injury and<br>Abnormalities                                                                                  | 10.5986                   | 2.1250                | ACE, AMBP, APOA1, C5, CAMP, CFB, CFH, CRP, F12, F5,<br>HLA-A, HP, HPX, HSPA5, IGF1, LBP, LTF, MST1, PGLYRP2,<br>PKM, PPIA, PRDX2, PROS1, PSAP, Retnlg, Serpina3g<br>(includes others) |
| Infectious Diseases                                                                                                                               | 10.5560                   |                       | ACE, AHSG, APOA1, APOM, C5, CFB, CRP, DYNC1H1, F5,<br>HSPA5, HSPA8, ITIH3, ITIH4, PKM, PPIA                                                                                           |
| Cellular Compromise,<br>Inflammatory Response                                                                                                     | 10.4855                   |                       | AHSG, APOA1, F5, FGG, IGF1, ITIH3, ITIH4, PROS1, PSAP                                                                                                                                 |
| Infectious Diseases                                                                                                                               | 10.1772                   | -1.7860               | ACE, AHSG, APOA1, APOM, C2, C5, CAMP, CFB, CRP,<br>DYNC1H1, F12, F5, HLA-A, HP, HSPA5, HSPA8, IGF1,<br>ITIH3, ITIH4, LTF, NRP1, PKM, PM20D1, PPIA, PRDX2,<br>PROS1, PSMA7, SERPINA10  |
| Cellular Movement, Immune Cell<br>Trafficking                                                                                                     | 10.0915                   | -1.0560               | APOA1, C2, C5, CAMP, CFB, CFH, CRP, HLA-A, HP,<br>HSPA5, LBP, LCP1, LTF, MST1, Orm1 (includes others),<br>PGLYRP2, PI16, PPIA, PROS1, Retnlg, SERPINF1                                |
| Immunological Disease                                                                                                                             | 10.0625                   |                       | ACE, AHSG, APOA1, APOM, BHMT, C2, C5, CAMP, CFB,<br>CFH, CRP, F5, HLA-A, HP, HSPA8, IGF1, ITIH4, LAP3, LBP,<br>LCP1, LTF, NRP1, PPIA, PRDX2                                           |
| Organismal Injury and<br>Abnormalities, Renal and<br>Urological Disease                                                                           | 10.0448                   | -0.8130               | ACE, AHSG, AMBP, C5, CFB, CFH, COLEC11, HPX, IGF1,<br>MST1, PKM                                                                                                                       |
| Infectious Diseases                                                                                                                               | 10.0232                   |                       | ACE, AHSG, APOA1, APOM, C5, CFB, CRP, F5, HSPA5,<br>HSPA8, ITIH3, ITIH4, PKM, PPIA                                                                                                    |
| Cardiovascular Disease,<br>Organismal Injury and<br>Abnormalities                                                                                 | 10.0186                   | -0.4840               | ACE, AHSG, APOA1, APOM, C5, CRP, F12, F5, FGG,<br>HABP2, HP, IGF1, PKM, PPIA, PRDX2, PROS1                                                                                            |
| Cell-To-Cell Signaling and<br>Interaction                                                                                                         | 9.9469                    | -1.2210               | APOA1, C5, CAMP, CFH, CRP, FGG, LBP, LCP1, LTF, PKM,<br>PRDX2                                                                                                                         |
| Free Radical Scavenging                                                                                                                           | 9.9318                    | 0.7730                | ACE, APOA1, C5, CAMP, CFH, CRP, HP, IGF1, LTF, PPIA,<br>SERPINF1                                                                                                                      |
| Cell-To-Cell Signaling and<br>Interaction, Hematological System<br>Development and Function,<br>Immune Cell Trafficking,<br>Inflammatory Response | 9.8996                    | -1.2430               | ACE, APOA1, CAMP, CRP, FGG, HLA-A, IGF1, LBP, LTF,<br>Orm1 (includes others), PROS1, PSAP, SERPINF1                                                                                   |

Table S1. *Cont.*

| Ingenuity Canonical Pathways                                                                                                          | -log ( <i>p</i><br>value) | Activation<br>z-score | Molecules                                                                                                                                                                                                |
|---------------------------------------------------------------------------------------------------------------------------------------|---------------------------|-----------------------|----------------------------------------------------------------------------------------------------------------------------------------------------------------------------------------------------------|
| Cell-To-Cell Signaling and Interaction                                                                                                | 9.7645                    | -2.4180               | ACE, APOA1, C5, CAMP, CFH, CRP, F5, FGG, HLA-A, HPX, IGF1, LBP, LTF, MST1, Orm1 (includes others), PGLYRP2, PKM, PPIA, PROS1, PSAP, SERPINF1                                                             |
| Cellular Movement                                                                                                                     | 9.6737                    | -1.7810               | AHSG, APOA1, C2, C5, CAMP, CFB, CFH, CRP, F12, HABP2, HLA-A, HP, HSPA5, HSPA8, IGF1, LBP, LCP1, LTF, MST1, MYOCD, NRP1, Orm1 (includes others), PGLYRP2, PI16, PKM, PPIA, PRDX2, PROS1, Retnlg, SERPINF1 |
| Cellular Movement, Hematological System Development and Function, Immune Cell Trafficking                                             | 9.5901                    | -1.2740               | APOA1, C2, C5, CAMP, CFB, CFH, CRP, HLA-A, HP, HSPA5, LBP, LCP1, LTF, MST1, PGLYRP2, PI16, PPIA, Retnlg, SERPINF1                                                                                        |
| Cell-To-Cell Signaling and Interaction                                                                                                | 9.5768                    | -1.2180               | APOA1, C5, CAMP, CFH, CRP, F12, F5, FGG, LBP, LCP1, LTF, NRP1, PKM, PRDX2                                                                                                                                |
| Organismal Injury and Abnormalities, Respiratory Disease                                                                              | 9.0904                    | -1.5800               | ACE, AHSG, AMBP, C2, C5, CFB, CRP, F12, HABP2, HSPA5, IGF1                                                                                                                                               |
| Cardiovascular Disease                                                                                                                | 9.0660                    | -0.3970               | ACE, AHSG, APOA1, APOM, C5, CRP, F12, F5, FGG, HABP2, HP, IGF1, PKM, PPIA, PRDX2                                                                                                                         |
| Cell-To-Cell Signaling and Interaction, Hematological System Development and Function, Immune Cell Trafficking, Inflammatory Response | 9.0381                    | -1.1050               | ACE, CAMP, CRP, FGG, HLA-A, IGF1, LBP, LTF, Orm1 (includes others), PROS1, SERPINF1                                                                                                                      |
| Infectious Diseases                                                                                                                   | 9.0182                    | -1.9700               | ACE, AHSG, APOA1, APOM, C2, C5, CFB, CRP, DYNC1H1, F5, HLA-A, HSPA5, HSPA8, IGF1, ITIH3, ITIH4, LTF, PKM, PM20D1, PPIA, PSMA7                                                                            |
| Cardiovascular Disease, Hematological Disease, Hereditary Disorder, Organismal Injury and Abnormalities                               | 8.9245                    |                       | F5, FGG, HABP2, PROS1                                                                                                                                                                                    |
| Cell-To-Cell Signaling and Interaction, Hematological System Development and Function, Inflammatory Response                          | 8.9208                    | -1.4440               | APOA1, C5, CAMP, CFH, CRP, FGG, LBP, LCP1, PKM, PRDX2                                                                                                                                                    |
| Cell Death and Survival                                                                                                               | 8.7375                    | -0.7850               | C5, C8G, C9, CAMP, CFB, CFH, HLA-A, HSPA5, LBP, PPIA, PRDX2                                                                                                                                              |

Table S1. *Cont.*

| Ingenuity Canonical Pathways                                                                                     | -log ( <i>p</i><br>value) | Activation<br>z-score | Molecules                                                                                                                                                                                                                                                                                 |
|------------------------------------------------------------------------------------------------------------------|---------------------------|-----------------------|-------------------------------------------------------------------------------------------------------------------------------------------------------------------------------------------------------------------------------------------------------------------------------------------|
| Gastrointestinal Disease, Hepatic System Disease, Organismal Injury and Abnormalities                            | 8.6253                    | 1.3830                | ACE, AHSG, ALDOB, AMBP, APOA1, BHMT, C5, C9, CEP250, CFB, CFH, COL24A1, CRP, DYNC1H1, F12, F5, FGG, HABP2, HLA-A, HP, HPX, HSPA5, HSPA8, IGF1, ITIH1, ITIH2, ITIH4, LAP3, LBP, LCP1, LOXL1, MST1, MYOCD, PGLYRP2, PI16, PKM, PM20D1, PPIA, PRDX2, PROS1, PROZ, PSAP, SAA2-SAA4, SERPINA10 |
| Organismal Injury and Abnormalities, Tissue Morphology                                                           | 8.6198                    |                       | ACE, APOA1, CAMP, CRP, F12, F5, FGG, HABP2, HLA-A, IGF1, NRP1, PPIA, PRDX2                                                                                                                                                                                                                |
| Organismal Injury and Abnormalities, Renal and Urological Disease                                                | 8.4698                    | -1.1180               | AHSG, AMBP, C5, CFB, CFH, COLEC11, IGF1, MST1, PKM                                                                                                                                                                                                                                        |
| Neurological Disease, Organismal Injury and Abnormalities                                                        | 8.4609                    |                       | ACE, APOA1, C5, C9, CFB, CRP, DYNC1H1, F12, F5, HP, HPX, HSPA5, IGF1, LTF, MYOCD, PPIA, PRDX2, PROS1, PSAP                                                                                                                                                                                |
| Cell-To-Cell Signaling and Interaction, Hematological System Development and Function, Immune Cell Trafficking   | 8.4401                    | -1.4600               | APOA1, C5, CAMP, CFH, CRP, FGG, LBP, LCP1, LTF, NRP1, PKM, PRDX2                                                                                                                                                                                                                          |
| Organismal Injury and Abnormalities, Respiratory Disease                                                         | 8.2815                    | -1.3390               | ACE, AHSG, AMBP, C2, C5, CFB, F12, HABP2, HSPA5, IGF1                                                                                                                                                                                                                                     |
| Cellular Movement                                                                                                | 8.2411                    | -1.1170               | APOA1, C2, C5, CAMP, CFB, CFH, CRP, HP, HSPA5, LBP, LCP1, LTF, MST1, PPIA, SERPINF1                                                                                                                                                                                                       |
| Cell Death and Survival, Connective Tissue Disorders, Hematological Disease, Organismal Injury and Abnormalities | 8.1931                    | -0.3390               | C5, C8G, CAMP, CFB, CFH, HSPA5, PPIA, PRDX2                                                                                                                                                                                                                                               |
| Cardiovascular Disease, Organismal Injury and Abnormalities                                                      | 8.1831                    | -0.3970               | ACE, AHSG, APOA1, APOM, C5, CRP, F12, F5, FGG, HP, IGF1, PKM, PPIA, PRDX2                                                                                                                                                                                                                 |

Table S1. *Cont.*

| Ingenuity Canonical Pathways                                                                                                                                                                             | -log ( <i>p</i><br>value) | Activation<br>z-score | Molecules                                                                                                                                                                                                                                                                                                        |
|----------------------------------------------------------------------------------------------------------------------------------------------------------------------------------------------------------|---------------------------|-----------------------|------------------------------------------------------------------------------------------------------------------------------------------------------------------------------------------------------------------------------------------------------------------------------------------------------------------|
| Cancer, Gastrointestinal Disease,<br>Organismal Injury and<br>Abnormalities                                                                                                                              | 8.1765                    |                       | ACE, ACTBL2, AHSG, ALDOB, AMBP, APOA1, BHMT, C5,<br>C8G, C9, CEP250, CFB, COL24A1, COLEC11, CRP,<br>DYNC1H1, F12, F5, FGG, HABP2, HLA-A, HP, HPX, HSPA5,<br>HSPA8, IGF1, ITIH1, ITIH2, ITIH4, LAP3, LBP, LOXL1, LTF,<br>MST1, MYOCD, NRP1, PGLYRP2, PI16, PKM, PM20D1,<br>PPIA, PROZ, PSAP, SAA2-SAA4, SERPINA10 |
| Carbohydrate Metabolism                                                                                                                                                                                  | 8.1530                    | -2.3060               | APOA1, CAMP, CFH, IGF1, ITIH2, LBP, PSAP                                                                                                                                                                                                                                                                         |
| Free Radical Scavenging                                                                                                                                                                                  | 8.1415                    | -1.1230               | ACE, APOA1, C5, CAMP, CFB, CFH, CRP, HP, IGF1, ITIH4,<br>LTF, PPIA, PRDX2, SERPINF1                                                                                                                                                                                                                              |
| Cell-To-Cell Signaling and<br>Interaction, Hematological System<br>Development and Function                                                                                                              | 8.1018                    | -0.8830               | C5, CFH, CRP, F12, FGG, IGF1, NRP1, PPIA, PRDX2,<br>SERPINF1                                                                                                                                                                                                                                                     |
| Cardiovascular Disease,<br>Organismal Injury and<br>Abnormalities                                                                                                                                        | 8.0311                    | -0.0860               | ACE, AHSG, APOA1, APOM, C5, CRP, F5, FGG, HP, IGF1,<br>PKM, PPIA, PRDX2                                                                                                                                                                                                                                          |
| Cardiovascular Disease,<br>Organismal Injury and<br>Abnormalities                                                                                                                                        | 7.8861                    | -0.2100               | ACE, APOA1, C5, CRP, F12, F5, FGG, HLA-A, IGF1, NRP1,<br>PPIA, PROS1                                                                                                                                                                                                                                             |
| Cardiovascular System<br>Development and Function,<br>Cellular Development, Cellular<br>Function and Maintenance,<br>Cellular Growth and Proliferation,<br>Organismal Development, Tissue<br>Development | 7.8356                    | -0.0440               | CAMP, F12, HABP2, HSPA5, IGF1, NRP1, PKM, PPIA,<br>PROS1                                                                                                                                                                                                                                                         |
| Cardiovascular System<br>Development and Function,<br>Cellular Development, Cellular<br>Function and Maintenance,<br>Cellular Growth and Proliferation,<br>Organismal Development, Tissue<br>Development | 7.7328                    | 0.3290                | APOA1, CAMP, F12, HABP2, HSPA5, IGF1, NRP1, PKM,<br>PPIA, PROS1, SERPINF1                                                                                                                                                                                                                                        |
| Cell-To-Cell Signaling and<br>Interaction                                                                                                                                                                | 7.7122                    | -1.5340               | C5, CFH, CRP, F12, FGG, IGF1, LTF, NRP1, PPIA, PRDX2,<br>SERPINF1                                                                                                                                                                                                                                                |

Table S1. *Cont.*

| Ingenuity Canonical Pathways                                                                                                               | -log ( <i>p</i><br>value) | Activation<br>z-score | Molecules                                                                                                                                                                                                                                                                                    |
|--------------------------------------------------------------------------------------------------------------------------------------------|---------------------------|-----------------------|----------------------------------------------------------------------------------------------------------------------------------------------------------------------------------------------------------------------------------------------------------------------------------------------|
| Cardiovascular Disease,<br>Hereditary Disorder, Organismal<br>Injury and Abnormalities<br>Hematological System<br>Development and Function | 7.5498                    |                       | ACE, APOA1, CFB, CFH, CRP, F12, F5, FGG, HABP2, IGF1,<br>NRP1, PPIA, PROS1                                                                                                                                                                                                                   |
| Carbohydrate Metabolism                                                                                                                    | 7.4789                    | -0.9750               | C9, CRP, F12, F5, FGG, HP, PPIA, PROS1, PROZ, SERPINF1                                                                                                                                                                                                                                       |
| Cardiovascular Disease,<br>Hereditary Disorder, Organismal<br>Injury and Abnormalities                                                     | 7.4660                    | -2.1690               | APOA1, CAMP, CFH, IGF1, ITIH2, LBP                                                                                                                                                                                                                                                           |
| Metabolic Disease, Neurological<br>Disease, Organismal Injury and<br>Abnormalities, Psychological<br>Disorders                             | 7.4510                    |                       | ACE, CFB, CFH, F5, FGG, HABP2, IGF1, NRP1, PROS1                                                                                                                                                                                                                                             |
| Endocrine System Disorders,<br>Organismal Injury and<br>Abnormalities                                                                      | 7.4473                    |                       | ACE, APOA1, C5, C9, CFB, CRP, F12, HP, HPX, HSPA5,<br>IGF1, MYOCD, PROS1, PSAP                                                                                                                                                                                                               |
| Cellular Function and Maintenance                                                                                                          | 7.3706                    |                       | AHSG, APOA1, HSPA5, HSPA8, PRDX2                                                                                                                                                                                                                                                             |
| Cancer, Gastrointestinal Disease,<br>Organismal Injury and<br>Abnormalities                                                                | 7.3478                    | -2.0720               | ACE, AMBP, APOA1, C5, CAMP, CFH, COLEC11, CRP, HP,<br>HPX, HSPA5, HSPA8, PKM, PROS1                                                                                                                                                                                                          |
| Cancer, Gastrointestinal Disease,<br>Hepatic System Disease,<br>Organismal Injury and<br>Abnormalities                                     | 7.3002                    | 0.4380                | ACE, AHSG, ALDOB, AMBP, APOA1, BHMT, C5, C9,<br>CEP250, CFB, COL24A1, CRP, DYNC1H1, F12, F5, FGG,<br>HABP2, HLA-A, HP, HPX, HSPA5, HSPA8, IGF1, ITIH1,<br>ITIH2, ITIH4, LAP3, LBP, LCP1, LOXL1, MST1, MYOCD,<br>PGLYRP2, PI16, PKM, PM20D1, PPIA, PRDX2, PROZ, PSAP,<br>SAA2-SAA4, SERPINA10 |
| Cancer, Gastrointestinal Disease,<br>Hepatic System Disease,<br>Organismal Injury and<br>Abnormalities                                     | 7.2916                    |                       | ACE, AHSG, ALDOB, AMBP, APOA1, BHMT, C5, C9,<br>CEP250, CFB, COL24A1, CRP, DYNC1H1, F12, F5, FGG,<br>HABP2, HP, HPX, HSPA5, HSPA8, IGF1, ITIH1, ITIH2,<br>ITIH4, LAP3, LBP, LOXL1, MST1, MYOCD, PGLYRP2, PI16,<br>PKM, PM20D1, PROZ, PSAP, SAA2-SAA4, SERPINA10                              |
| Cancer, Gastrointestinal Disease,<br>Hepatic System Disease,<br>Organismal Injury and<br>Abnormalities                                     | 7.2526                    | 0.4380                | ACE, AHSG, ALDOB, AMBP, APOA1, BHMT, C5, C9,<br>CEP250, CFB, COL24A1, CRP, DYNC1H1, F12, F5, FGG,<br>HABP2, HP, HPX, HSPA5, HSPA8, IGF1, ITIH1, ITIH2,<br>ITIH4, LAP3, LBP, LCP1, LOXL1, MST1, MYOCD, PGLYRP2,<br>PI16, PKM, PM20D1, PPIA, PRDX2, PROZ, PSAP, SAA2-<br>SAA4, SERPINA10       |



Table S1. *Cont.*

| Ingenuity Canonical Pathways                                                                               | -log ( <i>p</i><br>value) | Activation<br>z-score | Molecules                                                                                                                                                                                                                                                  |
|------------------------------------------------------------------------------------------------------------|---------------------------|-----------------------|------------------------------------------------------------------------------------------------------------------------------------------------------------------------------------------------------------------------------------------------------------|
| Tissue Development                                                                                         | 7.1844                    | -0.7930               | APOA1, C5, CAMP, F12, HABP2, HSPA5, IGF1, ITIH4, LTF, MST1, NRP1, PKM, PPIA, PROS1, SERPINF1                                                                                                                                                               |
| Cancer, Gastrointestinal Disease, Hepatic System Disease, Organismal Injury and Abnormalities              | 7.1707                    |                       | ACE, AHSG, ALDOB, AMBP, APOA1, BHMT, C5, C9, CEP250, CFB, COL24A1, CRP, DYNC1H1, F12, F5, FGG, HABP2, HLA-A, HP, HPX, HSPA5, HSPA8, IGF1, ITIH1, ITIH2, ITIH4, LAP3, LBP, LOXL1, MST1, MYOCD, PGLYRP2, PI16, PKM, PM20D1, PROZ, PSAP, SAA2-SAA4, SERPINA10 |
| Protein Synthesis                                                                                          | 7.0825                    |                       | AHSG, APOA1, F5, FGG, IGF1, ITIH2, LTF, SERPINA10                                                                                                                                                                                                          |
| Tissue Development                                                                                         | 7.0788                    | 0.1280                | APOA1, CAMP, CFH, F12, HABP2, HSPA5, IGF1, MST1, NRP1, PKM, PPIA, PROS1, SERPINF1                                                                                                                                                                          |
| Gastrointestinal Disease, Inflammatory Disease, Inflammatory Response, Organismal Injury and Abnormalities | 7.0195                    | 0.2770                | CAMP, CFB, CRP, HP, LBP, LTF, MST1, PGLYRP2, PKM, PROS1, Retnlg, Serpina3g (includes others)                                                                                                                                                               |
| Lipid Metabolism, Molecular Transport, Small Molecule Biochemistry                                         | 6.7825                    | -1.5610               | ACE, AHSG, APOA1, APOM, BHMT, C5, CAMP, CFB, CRP, HP, HSPA5, IGF1, LBP, PKM, PSAP, SAA2-SAA4                                                                                                                                                               |
| Developmental Disorder, Hereditary Disorder, Immunological Disease, Organismal Injury and Abnormalities    | 6.7033                    |                       | C2, C5, C9, CFB                                                                                                                                                                                                                                            |
| Molecular Transport                                                                                        | 6.6440                    |                       | APOA1, C5, CFB, COLEC11, IGF1                                                                                                                                                                                                                              |
| Cardiovascular Disease, Hematological Disease, Organismal Injury and Abnormalities                         | 6.6440                    |                       | F12, F5, FGG, HABP2, PROS1                                                                                                                                                                                                                                 |
| Cardiovascular System Development and Function                                                             | 6.6003                    | -1.1250               | ACE, APOA1, C5, CAMP, CFB, CFH, F12, HABP2, HP, HSPA5, IGF1, MYOCD, NRP1, PKM, PPIA, PROS1, PSAP, SERPINF1                                                                                                                                                 |
| Cardiovascular System Development and Function, Organismal Development                                     | 6.5513                    | -1.1410               | APOA1, C5, CAMP, CFB, CFH, F12, HABP2, HP, HSPA5, IGF1, MYOCD, NRP1, PKM, PPIA, PROS1, PSAP, SERPINF1                                                                                                                                                      |

Table S1. *Cont.*

| Ingenuity Canonical Pathways                                                                                              | -log ( <i>p</i><br>value) | Activation<br>z-score | Molecules                                                                               |
|---------------------------------------------------------------------------------------------------------------------------|---------------------------|-----------------------|-----------------------------------------------------------------------------------------|
| Cardiovascular Disease, Cellular<br>Compromise, Organismal Injury<br>and Abnormalities                                    | 6.5361                    | 2.0000                | CRP, HP, HPX, SERPINF1                                                                  |
| Cell-To-Cell Signaling and<br>Interaction, Hematological System<br>Development and Function,<br>Inflammatory Response     | 6.5017                    | -0.2620               | CFH, CRP, F12, FGG, IGF1, PPIA, PRDX2, SERPINF1                                         |
| Hematological System<br>Development and Function,<br>Organismal Functions                                                 | 6.4855                    | -0.6470               | C9, CRP, F12, F5, FGG, PPIA, PROS1, PROZ, SERPINF1                                      |
| Cellular Compromise,<br>Inflammatory Response                                                                             | 6.4802                    |                       | AHSG, C5, CAMP, DYNC1H1, HP, HSPA8, LTF, PKM, PPIA,<br>PSAP                             |
| Cellular Function and Maintenance                                                                                         | 6.4318                    | -2.2340               | ACE, AHSG, APOA1, C5, CAMP, CFH, CRP, HP, HSPA5,<br>HSPA8, PKM, PROS1                   |
| Cellular Movement                                                                                                         | 6.4023                    | 0.5690                | APOA1, C2, C5, CFB, CFH, HLA-A, HSPA5, LBP, LTF,<br>NRP1, PI16, PPIA                    |
| Organismal Survival                                                                                                       | 6.3726                    | 0.1210                | APOA1, C5, CAMP, CFB, CFH, CRP, F12, HLA-A, HP, IGF1,<br>LBP, LTF, NRP1, PKM, SERPINA10 |
| Cellular Movement, Hematological<br>System Development and<br>Function, Immune Cell Trafficking,<br>Inflammatory Response | 6.3468                    | -1.2980               | APOA1, C2, C5, CAMP, CFB, CFH, CRP, HP, HSPA5, LBP,<br>MST1, PPIA, SERPINF1             |
| Metabolic Disease, Organismal<br>Injury and Abnormalities                                                                 | 6.3420                    | 2.0000                | ACE, APOA1, CRP, HSPA5, LBP, LCP1, PPIA, PSAP,<br>SERPINF1                              |
| Cell Death and Survival,<br>Organismal Injury and<br>Abnormalities, Renal and<br>Urological Disease                       | 6.3391                    | 0.6920                | C5, CFB, IGF1, MST1, PKM                                                                |
| Dermatological Diseases and<br>Conditions, Organismal Injury and<br>Abnormalities                                         | 6.3206                    |                       | C5, CAMP, CRP, HLA-A, NRP1, PPIA, PSAP                                                  |
| Cardiovascular Disease,<br>Hematological Disease, Hereditary<br>Disorder, Organismal Injury and<br>Abnormalities          | 6.2984                    |                       | F5, HABP2, PROS1                                                                        |

Table S1. *Cont.*

| Ingenuity Canonical Pathways                                                                                                                                                                                                                               | -log ( <i>p</i><br>value) | Activation<br>z-score | Molecules                                                                                                                                                                            |
|------------------------------------------------------------------------------------------------------------------------------------------------------------------------------------------------------------------------------------------------------------|---------------------------|-----------------------|--------------------------------------------------------------------------------------------------------------------------------------------------------------------------------------|
| Cell Death and Survival                                                                                                                                                                                                                                    | 6.2984                    |                       | ACE, CAMP, LTF                                                                                                                                                                       |
| Carbohydrate Metabolism, Lipid<br>Metabolism, Molecular Transport,<br>Small Molecule Biochemistry<br>Endocrine System Disorders,<br>Gastrointestinal Disease,<br>Inflammatory Disease,<br>Inflammatory Response,<br>Organismal Injury and<br>Abnormalities | 6.2984                    |                       | CAMP, CFB, LBP                                                                                                                                                                       |
| Cellular Movement, Hematological<br>System Development and<br>Function, Immune Cell Trafficking,<br>Inflammatory Response<br>Organismal Injury and<br>Abnormalities                                                                                        | 6.2907                    |                       | APOA1, F5, HSPA5, IGF1, PKM, PPIA, PRDX2                                                                                                                                             |
| Cellular Movement, Hematological<br>System Development and<br>Function, Immune Cell Trafficking,<br>Inflammatory Response<br>Organismal Injury and<br>Abnormalities                                                                                        | 6.2790                    | -1.4600               | APOA1, C5, CAMP, HP, MST1, PPIA                                                                                                                                                      |
| Cellular Movement, Hematological<br>System Development and<br>Function, Immune Cell Trafficking,<br>Inflammatory Response<br>Organismal Injury and<br>Abnormalities                                                                                        | 6.2668                    | 1.5200                | ACE, C5, CRP, F12, F5, FGG, NRP1, PGLYRP2, PPIA, PROS1,<br>PROZ                                                                                                                      |
| Cell Death and Survival<br>Cardiovascular System<br>Development and Function,<br>Organismal Development<br>Hematological Disease<br>Humoral Immune Response,<br>Inflammatory Response                                                                      | 6.2652                    | -0.8820               | ACE, C9, CAMP, CFH, HLA-A, HSPA5, LTF, SERPINF1                                                                                                                                      |
| Cellular Movement                                                                                                                                                                                                                                          | 6.2336                    | -0.9550               | APOA1, C5, CAMP, CFB, F12, HABP2, HSPA5, IGF1,<br>MYOCD, NRP1, PKM, PPIA, PROS1, PSAP, SERPINF1                                                                                      |
| Cellular Movement                                                                                                                                                                                                                                          | 6.1688                    | -1.0670               | C5, CFB, F12, F5, FGG, HSPA5, LTF, PPIA, PROS1                                                                                                                                       |
| Cellular Movement                                                                                                                                                                                                                                          | 6.1543                    |                       | C2, CFB, CFH, COLEC11, CRP, F12                                                                                                                                                      |
| Cellular Movement                                                                                                                                                                                                                                          | 6.1124                    | -1.5810               | APOA1, C5, CAMP, HP, IGF1, LBP, LCP1, MST1, NRP1,<br>PPIA, Retnlg, SERPINF1                                                                                                          |
| Cell-To-Cell Signaling and<br>Interaction, Hematological System<br>Development and Function,<br>Inflammatory Response<br>Metabolic Disease, Organismal<br>Injury and Abnormalities                                                                         | 6.0429                    | -1.0000               | CRP, FGG, LBP, LCP1, PRDX2                                                                                                                                                           |
| Cellular Movement                                                                                                                                                                                                                                          | 6.0255                    | 2.0000                | ACE, APOA1, CRP, HSPA5, LBP, LCP1, PPIA, PROS1, PSAP,<br>SERPINF1                                                                                                                    |
| Cellular Movement                                                                                                                                                                                                                                          | 6.0250                    | 2.2220                | ACE, APOA1, C5, C9, CAMP, CFB, CFH, CRP, DYNC1H1,<br>F5, HLA-A, HSPA5, HSPA8, IGF1, ITIH4, LBP, LTF, MST1,<br>MYOCD, NRP1, PKM, PM20D1, PPIA, PRDX2, PROS1,<br>PSAP, PSMA7, SERPINF1 |

Table S1. *Cont.*

| Ingenuity Canonical Pathways                                                                                                 | -log ( <i>p</i><br>value) | Activation<br>z-score | Molecules                                                                                       |
|------------------------------------------------------------------------------------------------------------------------------|---------------------------|-----------------------|-------------------------------------------------------------------------------------------------|
| Inflammatory Response,<br>Respiratory Disease                                                                                | 6.0097                    |                       | ACE, AMBP, APOA1, C5, CAMP, CRP, HLA-A, HSPA5,<br>IGF1, LBP, LTF, PPIA                          |
| Cellular Movement, Hematological<br>System Development and<br>Function, Immune Cell Trafficking                              | 6.0083                    | 0.0980                | APOA1, C2, C5, CFB, CFH, HLA-A, HSPA5, LBP, LTF, PI16,<br>PPIA                                  |
| Cell-To-Cell Signaling and<br>Interaction                                                                                    | 6.0044                    | -1.3870               | APOA1, C5, CFH, CRP, LCP1, LTF, PRDX2                                                           |
| Cancer, Gastrointestinal Disease,<br>Hepatic System Disease,<br>Organismal Injury and<br>Abnormalities                       | 5.9914                    |                       | ALDOB, BHMT, HSPA5, HSPA8                                                                       |
| Cardiovascular System<br>Development and Function                                                                            | 5.9914                    | 0.0140                | C5, CAMP, CFB, IGF1, LTF, NRP1, SERPINF1                                                        |
| Hereditary Disorder, Organismal<br>Injury and Abnormalities,<br>Psychological Disorders                                      | 5.9914                    |                       | ACE, C5, C9, CRP, DYNC1H1, FGG, HP, HSPA5, HSPA8,<br>IGF1, ITIH3, ITIH4, PKM, PPIA, PRDX2, PSAP |
| Cardiovascular System<br>Development and Function,<br>Cellular Movement                                                      | 5.9136                    | -0.2980               | APOA1, C5, CAMP, CRP, HSPA5, IGF1, NRP1, PKM,<br>PROS1, SERPINF1                                |
| Cellular Function and Maintenance                                                                                            | 5.9136                    | -1.8990               | ACE, APOA1, C5, CAMP, CFH, CRP, HP, HSPA5, PKM,<br>PROS1                                        |
| Infectious Diseases                                                                                                          | 5.8794                    |                       | C5, F12, F5, PROS1                                                                              |
| Cardiovascular Disease,<br>Hematological Disease,<br>Organismal Injury and<br>Abnormalities, Renal and<br>Urological Disease | 5.8794                    |                       | C2, C5, CFB, CFH                                                                                |
| Cellular Movement, Hematological<br>System Development and<br>Function, Immune Cell Trafficking,<br>Inflammatory Response    | 5.7959                    | -1.6980               | APOA1, C5, CAMP, HP, MST1, PPIA, SERPINF1                                                       |
| Hematological Disease                                                                                                        | 5.7721                    |                       | F12, F5, FGG, PPIA                                                                              |
| Hematological Disease, Metabolic<br>Disease, Organismal Injury and<br>Abnormalities                                          | 5.7696                    |                       | ACE, APOA1, CRP, LBP, LCP1, PPIA, SERPINF1                                                      |

Table S1. *Cont.*

| Ingenuity Canonical Pathways                                                                                                                         | -log ( <i>p</i><br>value) | Activation<br>z-score | Molecules                                                                                                                              |
|------------------------------------------------------------------------------------------------------------------------------------------------------|---------------------------|-----------------------|----------------------------------------------------------------------------------------------------------------------------------------|
| Dermatological Diseases and<br>Conditions, Organismal Injury and<br>Abnormalities                                                                    | 5.7645                    |                       | C5, CAMP, CRP, HSPA8, NRP1, PKM, PPIA, PSAP                                                                                            |
| Cellular Movement, Hematological<br>System Development and<br>Function, Immune Cell Trafficking                                                      | 5.7399                    | 0.0250                | APOA1, C2, C5, CAMP, CFB, CFH, CRP, LBP, LTF, PPIA                                                                                     |
| Cardiovascular Disease, Cell Death<br>and Survival, Connective Tissue<br>Disorders, Hematological Disease,<br>Organismal Injury and<br>Abnormalities | 5.7122                    |                       | C5, CFB, CFH, HSPA5, PPIA, PRDX2                                                                                                       |
| Respiratory Disease                                                                                                                                  | 5.6925                    |                       | ACE, AHSG, C5, CAMP, F12, HABP2, HP, HSPA5, LTF                                                                                        |
| Cardiovascular Disease,<br>Hematological Disease,<br>Organismal Injury and<br>Abnormalities                                                          | 5.6737                    |                       | C5, CFB, CFH, PPIA                                                                                                                     |
| Carbohydrate Metabolism, Lipid<br>Metabolism, Small Molecule<br>Biochemistry                                                                         | 5.6737                    | -1.9820               | C5, HSPA5, IGF1, PRDX2                                                                                                                 |
| Organismal Development,<br>Organismal Injury and<br>Abnormalities                                                                                    | 5.6737                    |                       | ACE, AMBP, APOA1, BHMT, CFH, COLEC11, HP, HPX,<br>IGF1, LOXL1, MST1, MYOCD, PGLYRP2, PRDX2, PSAP                                       |
| Cellular Function and Maintenance                                                                                                                    | 5.6696                    | 1.0300                | ACE, APOA1, C5, CAMP, CFH, CRP, F5, HLA-A, HPX,<br>HSPA5, HSPA8, IGF1, ITIH3, LTF, MYOCD, PGLYRP2,<br>PKM, PPIA, PRDX2, PSAP, SERPINF1 |
| Hematological Disease, Hereditary<br>Disorder, Organismal Injury and<br>Abnormalities                                                                | 5.6271                    |                       | F5, HABP2, PROS1                                                                                                                       |
| Cellular Movement, Hematological<br>System Development and<br>Function, Immune Cell Trafficking,<br>Inflammatory Response                            | 5.6271                    | -0.8490               | APOA1, CAMP, LCP1, PPIA                                                                                                                |
| Cellular Function and<br>Maintenance, Hematological<br>System Development and Function                                                               | 5.6253                    | -1.6670               | ACE, APOA1, C5, CAMP, CFH, CRP, PROS1                                                                                                  |

Table S1. *Cont.*

| Ingenuity Canonical Pathways                                                                                                                                                                           | -log ( <i>p</i><br>value) | Activation<br>z-score | Molecules                                                                                   |
|--------------------------------------------------------------------------------------------------------------------------------------------------------------------------------------------------------|---------------------------|-----------------------|---------------------------------------------------------------------------------------------|
| Cardiovascular Disease,<br>Neurological Disease, Organismal<br>Injury and Abnormalities                                                                                                                | 5.6216                    |                       | ACE, APOA1, CFH, CRP, F5, IGF1, NRP1, PROS1                                                 |
| Cellular Movement, Hematological<br>System Development and<br>Function, Immune Cell Trafficking,<br>Inflammatory Response                                                                              | 5.6126                    | -1.5850               | APOA1, C5, CAMP, HP, LCP1, MST1, PPIA                                                       |
| Cellular Movement                                                                                                                                                                                      | 5.5498                    | -1.6070               | C5, HABP2, HSPA5, IGF1, NRP1, PKM, PPIA, PROS1                                              |
| Cell-To-Cell Signaling and<br>Interaction                                                                                                                                                              | 5.5421                    | -0.9950               | CAMP, CFH, HLA-A, HSPA5, IGF1, LTF, NRP1, PKM,<br>PROS1, SERPINF1                           |
| Cellular Development, Cellular<br>Growth and Proliferation,<br>Hematological System<br>Development and Function,<br>Hematopoiesis, Lymphoid Tissue<br>Structure and Development, Tissue<br>Development | 5.5258                    | 0.3890                | CAMP, CRP, F5, HLA-A, HP, HPX, IGF1, LCP1, LTF, NRP1,<br>PGLYRP2, PKM, PRDX2, PSAP          |
| Neurological Disease, Skeletal and<br>Muscular Disorders                                                                                                                                               | 5.5045                    |                       | C5, C9, CFB, CRP, FGG, HP, HSPA5, HSPA8, IGF1, ITIH3,<br>ITIH4, LTF, PKM, PPIA, PRDX2, PSAP |
| Cellular Function and Maintenance<br>Cellular Movement, Hematological<br>System Development and<br>Function, Immune Cell Trafficking,<br>Inflammatory Response                                         | 5.4989                    | -1.6670               | ACE, APOA1, C5, CAMP, CFH, CRP, PROS1                                                       |
| Cell-To-Cell Signaling and<br>Interaction, Hematological System<br>Development and Function,<br>Inflammatory Response                                                                                  | 5.4776                    | -0.5200               | APOA1, C2, C5, CAMP, CFB, CFH, CRP, LBP, PPIA                                               |
| Dermatological Diseases and<br>Conditions, Organismal Injury and<br>Abnormalities                                                                                                                      | 5.4365                    | -0.9370               | C5, CAMP, CFH, CRP, PROS1                                                                   |
| Cell-To-Cell Signaling and<br>Interaction, Hematological System<br>Development and Function,<br>Immune Cell Trafficking                                                                                | 5.3936                    |                       | C5, CAMP, CRP, HSPA5, HSPA8, LTF, NRP1, PKM,<br>PM20D1, PPIA, PSAP                          |
|                                                                                                                                                                                                        | 5.3526                    | -0.8970               | APOA1, C5, CFH, LBP, LCP1, LTF                                                              |

Table S1. *Cont.*

| Ingenuity Canonical Pathways                                                                                              | -log ( <i>p</i><br>value) | Activation<br>z-score | Molecules                                                                                                                                                                                                                                                                                                                                                                                                                                                         |
|---------------------------------------------------------------------------------------------------------------------------|---------------------------|-----------------------|-------------------------------------------------------------------------------------------------------------------------------------------------------------------------------------------------------------------------------------------------------------------------------------------------------------------------------------------------------------------------------------------------------------------------------------------------------------------|
| Cardiovascular System<br>Development and Function,<br>Cellular Movement                                                   | 5.3307                    | -0.5740               | APOA1, C5, CRP, HSPA5, IGF1, NRP1, PKM, PROS1,<br>SERPINF1                                                                                                                                                                                                                                                                                                                                                                                                        |
| Lipid Metabolism, Small Molecule<br>Biochemistry                                                                          | 5.3261                    | -1.2360               | APOA1, CAMP, IGF1, LBP, PSAP                                                                                                                                                                                                                                                                                                                                                                                                                                      |
| Cell-To-Cell Signaling and<br>Interaction, Cellular Function and<br>Maintenance, Inflammatory<br>Response                 | 5.3098                    | -1.6260               | ACE, AHSG, APOA1, CAMP, CFH, CRP, HSPA8, PKM,<br>PROS1                                                                                                                                                                                                                                                                                                                                                                                                            |
| Protein Synthesis                                                                                                         | 5.2832                    | -0.5150               | APOA1, APOM, BHMT, CRP, FGG                                                                                                                                                                                                                                                                                                                                                                                                                                       |
| Cellular Movement, Hematological<br>System Development and<br>Function, Immune Cell Trafficking,<br>Inflammatory Response | 5.2765                    | -1.5120               | APOA1, C5, CAMP, HP, LBP, LCP1, MST1, PPIA, Retnlg                                                                                                                                                                                                                                                                                                                                                                                                                |
| Cardiovascular System<br>Development and Function,<br>Organismal Development                                              | 5.2676                    | -0.1330               | C5, CAMP, CFB, IGF1, NRP1, SERPINF1                                                                                                                                                                                                                                                                                                                                                                                                                               |
| Neurological Disease                                                                                                      | 5.2644                    |                       | C5, C9, CRP, DYNC1H1, FGG, HP, HSPA5, HSPA8, IGF1,<br>ITIH3, ITIH4, LTF, NRP1, PKM, PPIA, PRDX2, PSAP<br>ACE, ACTBL2, AHSG, ALDOB, AMBP, APOA1, BHMT, C2,<br>C5, C8G, C9, CAMP, CEP250, CFB, CFH, COL24A1,<br>COLEC11, CRP, DYNC1H1, F12, F5, FGG, HABP2, HLA-A,<br>HP, HPX, HSPA5, HSPA8, IGF1, ITIH1, ITIH2, ITIH3, ITIH4,<br>LAP3, LCP1, LOXL1, LTF, MST1, MYOCD, NRP1, PGLYRP2,<br>PI16, PKM, PM20D1, PPIA, PRDX2, PROS1, PROZ, PSMA7,<br>SAA2-SAA4, SERPINF1 |
| Cancer, Organismal Injury and<br>Abnormalities                                                                            | 5.2557                    | 0.2450                | ACE, APOA1, CAMP, CRP, FGG, HSPA5, HSPA8, IGF1,<br>PKM, PPIA, PSAP                                                                                                                                                                                                                                                                                                                                                                                                |
| Molecular Transport                                                                                                       | 5.2480                    | -1.9580               | ACE, ALDOB, AMBP, APOA1, BHMT, C5, C9, CEP250, CFB,<br>COL24A1, CRP, DYNC1H1, F12, F5, FGG, HABP2, HLA-A,<br>HP, HPX, HSPA5, HSPA8, IGF1, ITIH1, ITIH2, ITIH4, LAP3,<br>LOXL1, MYOCD, PI16, PKM, PM20D1, PROZ, PSAP, SAA2-<br>SAA4, SERPINA10                                                                                                                                                                                                                     |
| Cancer, Gastrointestinal Disease,<br>Organismal Injury and<br>Abnormalities                                               | 5.2381                    |                       |                                                                                                                                                                                                                                                                                                                                                                                                                                                                   |

Table S1. *Cont.*

| Ingenuity Canonical Pathways                                                                                                             | -log ( <i>p</i><br>value) | Activation<br>z-score | Molecules                                                                                                                                                                                                                                                                          |
|------------------------------------------------------------------------------------------------------------------------------------------|---------------------------|-----------------------|------------------------------------------------------------------------------------------------------------------------------------------------------------------------------------------------------------------------------------------------------------------------------------|
| Neurological Disease, Organismal Injury and Abnormalities, Psychological Disorders                                                       | 5.2218                    |                       | C9, CRP, FGG, HP, HSPA5, HSPA8, IGF1, ITIH3, ITIH4, LTF, PKM, PPIA, PRDX2, PSAP                                                                                                                                                                                                    |
| Cell-To-Cell Signaling and Interaction, Hematological System Development and Function                                                    | 5.2218                    | -0.8160               | APOA1, CRP, FGG, LBP, LCP1, NRP1, PRDX2                                                                                                                                                                                                                                            |
| Hereditary Disorder, Ophthalmic Disease, Organismal Injury and Abnormalities                                                             | 5.2182                    |                       | C2, CFB                                                                                                                                                                                                                                                                            |
| Organismal Injury and Abnormalities, Renal and Urological Disease                                                                        | 5.2182                    |                       | CFB, CRP                                                                                                                                                                                                                                                                           |
| Cardiovascular Disease, Hematological Disease, Organismal Injury and Abnormalities                                                       | 5.2132                    |                       | AMBP, C5, CFB, CFH, CRP, HPX, HSPA5, IGF1, PPIA, PRDX2                                                                                                                                                                                                                             |
| Cell-To-Cell Signaling and Interaction                                                                                                   | 5.1904                    |                       | CFH, HABP2, LTF                                                                                                                                                                                                                                                                    |
| Cancer, Organismal Injury and Abnormalities, Reproductive System Disease                                                                 | 5.1772                    |                       | ACE, ACTBL2, ALDOB, APOA1, C2, C5, C9, CAMP, CEP250, CFB, CFH, COL24A1, COLEC11, CRP, DYNC1H1, F5, FGG, HABP2, HLA-A, HP, HPX, HSPA5, IGF1, ITIH1, ITIH2, ITIH3, ITIH4, LAP3, LBP, LCP1, LOXL1, LTF, MST1, MYOCD, NRP1, PI16, PKM, PM20D1, PPIA, PROS1, PSMA7, SAA2-SAA4, SERPINF1 |
| Cell Death and Survival                                                                                                                  | 5.1421                    | 1.9640                | HSPA5, IGF1, PROS1, SERPINF1                                                                                                                                                                                                                                                       |
| Cell-To-Cell Signaling and Interaction                                                                                                   | 5.1319                    | -1.4800               | ACE, APOA1, C5, CAMP, CFH, CRP, PROS1                                                                                                                                                                                                                                              |
| Hereditary Disorder, Neurological Disease, Organismal Injury and Abnormalities, Psychological Disorders, Skeletal and Muscular Disorders | 5.1296                    |                       | C9, CRP, FGG, HP, HSPA5, HSPA8, IGF1, ITIH3, ITIH4, PKM, PPIA, PRDX2                                                                                                                                                                                                               |
| Carbohydrate Metabolism                                                                                                                  | 5.1079                    | -0.2100               | AMBP, APOA1, BHMT, C5, CAMP, CFB, HSPA5, IGF1, LBP, LTF, PKM                                                                                                                                                                                                                       |



Table S1. *Cont.*

| Ingenuity Canonical Pathways                                                                                                                                                          | -log ( <i>p</i><br>value) | Activation<br>z-score | Molecules                                                                                           |
|---------------------------------------------------------------------------------------------------------------------------------------------------------------------------------------|---------------------------|-----------------------|-----------------------------------------------------------------------------------------------------|
| Carbohydrate Metabolism, Lipid<br>Metabolism, Small Molecule<br>Biochemistry<br>Cell-To-Cell Signaling and<br>Interaction, Hematological System                                       | 5.1007                    |                       | APOA1, CAMP, LBP                                                                                    |
| Development and Function,<br>Immune Cell Trafficking,<br>Inflammatory Response<br>Cell Death and Survival,<br>Organismal Injury and<br>Abnormalities, Renal and<br>Urological Disease | 5.0804                    | -1.7090               | APOA1, C5, CFH, CRP, LCP1, PRDX2                                                                    |
| Protein Synthesis                                                                                                                                                                     | 5.0731                    | 0.2180                | C5, CFB, IGF1, MST1                                                                                 |
| Cardiovascular Disease,<br>Neurological Disease, Organismal<br>Injury and Abnormalities                                                                                               | 5.0565                    | -1.7010               | ACE, AHSG, AMBP, APOA1, APOM, C5, F12, F5, FGG,<br>HABP2, HSPA5, HSPA8, IGF1, ITIH2, LTF, SERPINA10 |
| Cardiovascular Disease,<br>Neurological Disease, Organismal<br>Injury and Abnormalities                                                                                               | 5.0448                    |                       | APOA1, F5, IGF1, NRP1, PROS1                                                                        |
| Cardiovascular Disease,<br>Organismal Injury and<br>Abnormalities                                                                                                                     | 5.0177                    |                       | ACE, AHSG, APOA1, CFH, CRP, F5, IGF1, LCP1, NRP1,<br>PROS1                                          |
| Cell Death and Survival                                                                                                                                                               | 5.0173                    |                       | C9, CFB, CFH                                                                                        |
| Endocrine System Disorders,<br>Metabolic Disease, Organismal<br>Injury and Abnormalities                                                                                              | 5.0173                    |                       | ACE, APOA1, CRP, LBP, LTF, PRDX2                                                                    |
| Organismal Injury and<br>Abnormalities, Respiratory Disease                                                                                                                           | 5.0173                    |                       | ACE, AHSG, C5, F12, HABP2, HSPA5                                                                    |
| Endocrine System Disorders,<br>Gastrointestinal Disease,<br>Inflammatory Disease,<br>Inflammatory Response,<br>Organismal Injury and<br>Abnormalities                                 | 5.0074                    |                       | APOA1, HSPA5, PKM, PRDX2                                                                            |

Table S1. *Cont.*

| Ingenuity Canonical Pathways                                                                                                                                           | -log ( <i>p</i><br>value) | Activation<br>z-score | Molecules                                                                                                                                                                                           |
|------------------------------------------------------------------------------------------------------------------------------------------------------------------------|---------------------------|-----------------------|-----------------------------------------------------------------------------------------------------------------------------------------------------------------------------------------------------|
| Cancer, Organismal Injury and Abnormalities                                                                                                                            | 4.9957                    |                       | ACE, ACTBL2, APOA1, C2, C5, C9, CEP250, CFB, CFH, COL24A1, CRP, DYNC1H1, F5, HLA-A, HP, HPX, HSPA5, IGF1, ITIH3, LBP, LCP1, LOXL1, LTF, MST1, MYOCD, NRP1, PI16, PKM, PM20D1, PPIA, PSMA7, SERPINF1 |
| Cellular Function and Maintenance                                                                                                                                      | 4.9957                    | 0.8160                | C5, CFH, CRP, F5, HLA-A, HPX, IGF1, PGLYRP2, PKM, PRDX2, PSAP                                                                                                                                       |
| Cardiovascular Disease, Hematological Disease, Metabolic Disease, Organismal Injury and Abnormalities                                                                  | 4.9914                    |                       | APOA1, CRP, LBP, LCP1, PPIA, SERPINF1                                                                                                                                                               |
| Cardiovascular Disease, Organismal Injury and Abnormalities                                                                                                            | 4.9706                    | 1.3420                | CRP, HP, HPX, PI16, SERPINF1                                                                                                                                                                        |
| Cancer, Gastrointestinal Disease, Hepatic System Disease, Organismal Injury and Abnormalities                                                                          | 4.9547                    |                       | ALDOB, BHMT, HSPA5, HSPA8, PKM                                                                                                                                                                      |
| Cardiovascular Disease, Cell Death and Survival, Connective Tissue Disorders, Hematological Disease, Organismal Injury and Abnormalities, Renal and Urological Disease | 4.9393                    |                       | C5, CFB, CFH                                                                                                                                                                                        |
| Embryonic Development, Organismal Development Cardiovascular System                                                                                                    | 4.9355                    |                       | ACE, APOA1, C5, CFH, HP, IGF1, LBP, MST1, MYOCD, PKM, PSAP                                                                                                                                          |
| Development and Function, Tissue Morphology                                                                                                                            | 4.9136                    | -1.1140               | APOA1, CAMP, CRP, IGF1                                                                                                                                                                              |
| Free Radical Scavenging                                                                                                                                                | 4.8996                    | -2.2360               | ACE, C5, CAMP, CFB, CRP, IGF1, LTF, PPIA, PRDX2                                                                                                                                                     |
| Carbohydrate Metabolism                                                                                                                                                | 4.8962                    | -0.9260               | ACE, AHSG, APOA1, C5, CAMP, HSPA5, IGF1, PKM                                                                                                                                                        |

Table S1. *Cont.*

| Ingenuity Canonical Pathways                                                                                                                                                         | -log ( <i>p</i><br>value) | Activation<br>z-score | Molecules                                                                                                                                                                                      |
|--------------------------------------------------------------------------------------------------------------------------------------------------------------------------------------|---------------------------|-----------------------|------------------------------------------------------------------------------------------------------------------------------------------------------------------------------------------------|
| Cellular Development, Cellular Growth and Proliferation, Hematological System Development and Function, Hematopoiesis, Lymphoid Tissue Structure and Development, Tissue Development | 4.8962                    | -0.3630               | CAMP, CRP, F5, HLA-A, HPX, IGF1, LCP1, LTF, PGLYRP2, PKM, PRDX2, PSAP                                                                                                                          |
| Free Radical Scavenging, Molecular Transport                                                                                                                                         | 4.8827                    |                       | C5, CAMP, IGF1, PRDX2                                                                                                                                                                          |
| Embryonic Development, Organismal Development                                                                                                                                        | 4.8729                    |                       | ACE, APOA1, C5, CFH, F5, HP, HSPA5, IGF1, LBP, LOXL1, MST1, MYOCD, NRP1, PKM, PRDX2, PSAP                                                                                                      |
| Inflammatory Response                                                                                                                                                                | 4.8665                    |                       | AHSG, CRP, LBP                                                                                                                                                                                 |
| Cell Death and Survival, Organismal Injury and Abnormalities, Renal and Urological Disease                                                                                           | 4.8477                    | 0.6920                | C5, CFB, IGF1, MST1, PKM                                                                                                                                                                       |
| Cell-To-Cell Signaling and Interaction, Inflammatory Response                                                                                                                        | 4.8041                    | -1.4740               | ACE, APOA1, C5, CAMP, CFH, CRP, PROS1                                                                                                                                                          |
| Cancer, Organismal Injury and Abnormalities, Reproductive System Disease                                                                                                             | 4.7986                    |                       | ACTBL2, APOA1, C2, C5, C9, CEP250, CFB, CFH, COL24A1, CRP, DYNC1H1, F5, HLA-A, HP, HPX, HSPA5, IGF1, ITIH3, LBP, LCP1, LOXL1, LTF, MST1, MYOCD, NRP1, PI16, PKM, PM20D1, PPIA, PSMA7, SERPINF1 |
| Dermatological Diseases and Conditions, Hematological Disease, Immunological Disease, Organismal Injury and Abnormalities                                                            | 4.7959                    |                       | C5, HLA-A, PPIA                                                                                                                                                                                |
| Immunological Disease                                                                                                                                                                | 4.7852                    |                       | C2, C5, C9, CFB, CFH, FGG, IGF1, LTF                                                                                                                                                           |
| Neurological Disease                                                                                                                                                                 | 4.7721                    |                       | APOA1, C9, CRP, FGG, HP, HSPA5, HSPA8, IGF1, ITIH3, ITIH4, PKM, PPIA, PRDX2                                                                                                                    |
| Cardiovascular System Development and Function, Organismal Development, Visual System Development and Function                                                                       | 4.7645                    | -0.6890               | C5, CFB, IGF1, NRP1, SERPINF1                                                                                                                                                                  |

Table S1. *Cont.*

| Ingenuity Canonical Pathways                                                                                                                                                                                                                                   | -log ( <i>p</i><br>value) | Activation<br>z-score | Molecules                                                                                                                                                                                                                                                                                                                             |
|----------------------------------------------------------------------------------------------------------------------------------------------------------------------------------------------------------------------------------------------------------------|---------------------------|-----------------------|---------------------------------------------------------------------------------------------------------------------------------------------------------------------------------------------------------------------------------------------------------------------------------------------------------------------------------------|
| Cell Death and Survival,<br>Organismal Injury and<br>Abnormalities                                                                                                                                                                                             | 4.7496                    | 0.2010                | ACE, CAMP, CRP, HSPA5, IGF1, ITIH4, MST1, PKM, PPIA,<br>PRDX2, SERPINF1                                                                                                                                                                                                                                                               |
| Organismal Injury and<br>Abnormalities, Renal and<br>Urological Disease                                                                                                                                                                                        | 4.7423                    |                       | CFB, CFH                                                                                                                                                                                                                                                                                                                              |
| Cancer, Organismal Injury and<br>Abnormalities                                                                                                                                                                                                                 | 4.7423                    | -0.1920               | ACE, ACTBL2, AHSG, ALDOB, AMBP, APOA1, BHMT, C2,<br>C5, C8G, C9, CEP250, CFB, CFH, COL24A1, COLEC11, CRP,<br>DYNC1H1, F12, F5, FGG, HABP2, HLA-A, HP, HPX, HSPA5,<br>HSPA8, IGF1, ITIH1, ITIH2, ITIH3, ITIH4, LAP3, LCP1,<br>LOXL1, LTF, MST1, MYOCD, NRP1, PGLYRP2, PI16, PKM,<br>PM20D1, PPIA, PRDX2, PROS1, PROZ, PSMA7, SAA2-SAA4 |
| Cellular Movement, Hematological<br>System Development and<br>Function, Immune Cell Trafficking<br>Cell-To-Cell Signaling and<br>Interaction, Cellular Function and<br>Maintenance, Hematological<br>System Development and<br>Function, Inflammatory Response | 4.7399                    | -1.7910               | APOA1, C5, CAMP, HLA-A, HP, LCP1, MST1, PGLYRP2,<br>PPIA, SERPINF1                                                                                                                                                                                                                                                                    |
| Inflammatory Response                                                                                                                                                                                                                                          | 4.7352                    | -1.8640               | ACE, AHSG, APOA1, C5, CAMP, CFH, CRP, HSPA8, LTF,<br>PKM, PROS1                                                                                                                                                                                                                                                                       |
| Cardiovascular Disease,<br>Organismal Injury and<br>Abnormalities, Skeletal and<br>Muscular Disorders                                                                                                                                                          | 4.7328                    |                       | ACE, APOA1, C5, CRP, PPIA                                                                                                                                                                                                                                                                                                             |
| Cellular Movement, Hematological<br>System Development and<br>Function, Immune Cell Trafficking,<br>Inflammatory Response<br>Dermatological Diseases and<br>Conditions, Organismal Injury and<br>Abnormalities                                                 | 4.7305                    | -0.5070               | APOA1, C2, C5, CFB, CFH, HSPA5, LBP, PPIA                                                                                                                                                                                                                                                                                             |
|                                                                                                                                                                                                                                                                | 4.7282                    |                       | C5, HLA-A, PPIA                                                                                                                                                                                                                                                                                                                       |

Table S1. *Cont.*

| Ingenuity Canonical Pathways                                                                                             | -log ( <i>p</i><br>value) | Activation<br>z-score | Molecules                                                                                                                                         |
|--------------------------------------------------------------------------------------------------------------------------|---------------------------|-----------------------|---------------------------------------------------------------------------------------------------------------------------------------------------|
| Cell-To-Cell Signaling and Interaction, Cellular Function and Maintenance, Hematological System Development and Function | 4.7235                    | -1.1450               | ACE, APOA1, CAMP, CFH, CRP, PROS1                                                                                                                 |
| Ophthalmic Disease, Organismal Injury and Abnormalities                                                                  | 4.7122                    |                       | C2, C9, CFB, CFH                                                                                                                                  |
| Cell-To-Cell Signaling and Interaction, Cellular Function and Maintenance, Inflammatory Response                         | 4.7033                    | -1.1450               | ACE, APOA1, CAMP, CFH, CRP, PROS1                                                                                                                 |
| Cellular Movement, Hematological System Development and Function, Immune Cell Trafficking                                | 4.7011                    | -0.5640               | APOA1, C2, C5, CFB, CFH, LBP, PPIA                                                                                                                |
| Respiratory Disease                                                                                                      | 4.7011                    |                       | ACE, C5, CAMP, F12, HABP2, HP, LTF                                                                                                                |
| Gastrointestinal Disease, Organismal Injury and Abnormalities                                                            | 4.6861                    | -1.1310               | C2, C5, CFB, LTF                                                                                                                                  |
| Cardiovascular Disease, Organismal Injury and Abnormalities                                                              | 4.6799                    |                       | ACE, APOA1, C5, CRP, F12, PPIA                                                                                                                    |
| Antimicrobial Response, Inflammatory Response                                                                            | 4.6778                    |                       | C5, CAMP, COLEC11, HLA-A, HSPA8, LTF, PGLYRP2, PPIA                                                                                               |
| Organismal Development                                                                                                   | 4.6716                    |                       | ACE, AMBP, APOA1, BHMT, C5, CFB, CFH, COLEC11, HP, HPX, IGF1, LOXL1, MST1, MYOCD, NRP1, PGLYRP2, PPIA, PRDX2, PSAP                                |
| Organismal Survival                                                                                                      | 4.6655                    | 3.4150                | ACE, AMBP, APOA1, C5, CAMP, CFB, CFH, CRP, DYNC1H1, F5, FGG, HP, HSPA5, IGF1, LCP1, MYOCD, NRP1, PGLYRP2, PKM, PPIA, PROS1, PROZ, PSAP, SERPINA10 |
| Cardiovascular Disease, Organismal Injury and Abnormalities                                                              | 4.6478                    |                       | APOA1, CRP, F5, FGG, IGF1, PPIA                                                                                                                   |
| Cell-To-Cell Signaling and Interaction, Inflammatory Response                                                            | 4.6459                    | -1.3480               | ACE, APOA1, C5, CAMP, CFH, CRP, LTF, PROS1                                                                                                        |

Table S1. *Cont.*

| Ingenuity Canonical Pathways                                                                                                                                                  | -log ( <i>p</i><br>value) | Activation<br>z-score | Molecules                                                                                                                                                                                                                                                                                                                                               |
|-------------------------------------------------------------------------------------------------------------------------------------------------------------------------------|---------------------------|-----------------------|---------------------------------------------------------------------------------------------------------------------------------------------------------------------------------------------------------------------------------------------------------------------------------------------------------------------------------------------------------|
| Organismal Injury and Abnormalities, Renal and Urological Disease, Gastrointestinal Disease, Inflammatory Disease, Inflammatory Response, Organismal Injury and Abnormalities | 4.6289                    |                       | ACE, C5, CFB, CRP, F5, MST1, PPIA                                                                                                                                                                                                                                                                                                                       |
| Dermatological Diseases and Conditions, Gastrointestinal Disease, Immunological Disease, Organismal Injury and Abnormalities                                                  | 4.6271                    |                       | CAMP, CFB, HP, LBP, Retnlg, Serpina3g (includes others)                                                                                                                                                                                                                                                                                                 |
| Infectious Diseases                                                                                                                                                           | 4.6055                    |                       | C5, HLA-A, PPIA                                                                                                                                                                                                                                                                                                                                         |
| Cancer, Organismal Injury and Abnormalities                                                                                                                                   | 4.5969                    |                       | C5, CAMP, CRP, F5, HLA-A, LBP, LTF<br>ACE, ACTBL2, ALDOB, AMBP, APOA1, C2, C5, C8G, C9, CAMP, CEP250, CFB, CFH, COL24A1, COLEC11, CRP, DYNC1H1, F5, FGG, HABP2, HLA-A, HP, HPX, HSPA5, HSPA8, IGF1, ITIH1, ITIH2, ITIH3, ITIH4, LAP3, LBP, LCP1, LOXL1, LTF, MST1, MYOCD, NRP1, PI16, PKM, PM20D1, PPIA, PRDX2, PROS1, PSAP, PSMA7, SAA2-SAA4, SERPINF1 |
| Endocrine System Disorders, Gastrointestinal Disease, Immunological Disease, Metabolic Disease, Organismal Injury and Abnormalities                                           | 4.5901                    |                       | APOM, CFB, CFH, CRP, HLA-A, IGF1, ITIH4, LCP1, PPIA                                                                                                                                                                                                                                                                                                     |
| Renal and Urological System Development and Function                                                                                                                          | 4.5784                    |                       | ACE, C5, CFH, COLEC11, HP, IGF1, MYOCD, PSAP                                                                                                                                                                                                                                                                                                            |
| Cancer, Organismal Injury and Abnormalities                                                                                                                                   | 4.5751                    |                       | ACE, ACTBL2, AHSG, ALDOB, AMBP, APOA1, BHMT, C2, C5, C8G, C9, CEP250, CFB, CFH, COL24A1, COLEC11, CRP, DYNC1H1, F12, F5, FGG, HABP2, HLA-A, HP, HPX, HSPA5, HSPA8, IGF1, ITIH1, ITIH2, ITIH3, ITIH4, LAP3, LCP1, LOXL1, LTF, MST1, MYOCD, NRP1, PGLYRP2, PI16, PKM, PM20D1, PPIA, PRDX2, PROS1, PROZ, PSMA7, SAA2-SAA4                                  |
|                                                                                                                                                                               | 4.5719                    | -0.0540               |                                                                                                                                                                                                                                                                                                                                                         |

Table S1. *Cont.*

| Ingenuity Canonical Pathways                                                                                            | -log ( <i>p</i><br>value) | Activation<br>z-score | Molecules                                 |
|-------------------------------------------------------------------------------------------------------------------------|---------------------------|-----------------------|-------------------------------------------|
| Dermatological Diseases and<br>Conditions, Organismal Injury and<br>Abnormalities                                       | 4.5331                    |                       | C5, F5, PPIA, PROS1                       |
| Cardiovascular Disease,<br>Hematological Disease, Metabolic<br>Disease, Organismal Injury and<br>Abnormalities          | 4.5100                    |                       | APOA1, CRP, LCP1, SERPINF1                |
| Cell-To-Cell Signaling and<br>Interaction, Cellular Function and<br>Maintenance, Inflammatory<br>Response               | 4.5100                    | -0.6510               | ACE, CAMP, CFH, CRP                       |
| Cellular Assembly and<br>Organization, Inflammatory<br>Response                                                         | 4.4949                    |                       | ACE, C5, HPX                              |
| Cell-To-Cell Signaling and<br>Interaction, Hematological System<br>Development and Function,<br>Immune Cell Trafficking | 4.4921                    | -0.8000               | APOA1, C5, CFH, LCP1, LTF                 |
| Cardiovascular Disease,<br>Organismal Injury and<br>Abnormalities, Tissue Morphology                                    | 4.4750                    |                       | APOA1, CRP, F12, FGG, HLA-A, PPIA         |
| Organismal Injury and<br>Abnormalities, Renal and<br>Urological Disease                                                 | 4.4750                    | 0.1520                | ACE, CFB, CFH, CRP, MST1, PKM             |
| Cardiovascular Disease,<br>Organismal Injury and<br>Abnormalities                                                       | 4.4647                    |                       | ACE, APOA1, C5, CRP, F5, PPIA             |
| Cellular Movement                                                                                                       | 4.4634                    | -0.3750               | APOA1, C2, C5, CFB, CFH, HSPA5, LBP, PPIA |
| Protein Synthesis                                                                                                       | 4.4622                    | -0.7830               | APOA1, APOM, BHMT, CRP                    |
| Cardiovascular Disease,<br>Hematological Disease,<br>Organismal Injury and<br>Abnormalities                             | 4.4622                    |                       | F5, HABP2, PROS1, SERPINA10               |

Table S1. *Cont.*

| Ingenuity Canonical Pathways                                                                                                                                  | -log ( <i>p</i><br>value) | Activation<br>z-score | Molecules                                                                                                                                                                                                                                                                                                                                   |
|---------------------------------------------------------------------------------------------------------------------------------------------------------------|---------------------------|-----------------------|---------------------------------------------------------------------------------------------------------------------------------------------------------------------------------------------------------------------------------------------------------------------------------------------------------------------------------------------|
| Cancer, Organismal Injury and Abnormalities                                                                                                                   | 4.4597                    |                       | ACE, ACTBL2, AHSG, ALDOB, AMBP, APOA1, BHMT, C2, C5, C8G, C9, CEP250, CFB, CFH, COL24A1, COLEC11, CRP, DYNC1H1, F12, F5, FGG, HABP2, HLA-A, HP, HPX, HSPA5, HSPA8, IGF1, ITIH1, ITIH2, ITIH3, ITIH4, LAP3, LBP, LCP1, LOXL1, LTF, MST1, MYOCD, NRP1, PGLYRP2, PI16, PKM, PM20D1, PPIA, PRDX2, PROS1, PROZ, PSAP, PSMA7, SAA2-SAA4, SERPINF1 |
| Hematological System Development and Function                                                                                                                 | 4.4413                    |                       | IGF1, LBP                                                                                                                                                                                                                                                                                                                                   |
| Endocrine System Disorders, Gastrointestinal Disease, Immunological Disease, Inflammatory Disease, Inflammatory Response, Organismal Injury and Abnormalities | 4.4413                    |                       | APOA1, PKM, PRDX2                                                                                                                                                                                                                                                                                                                           |
| Cellular Movement, Hair and Skin Development and Function                                                                                                     | 4.4413                    |                       | APOA1, CAMP, PPIA                                                                                                                                                                                                                                                                                                                           |
| Cardiovascular System Development and Function, Cell-To-Cell Signaling and Interaction                                                                        | 4.4168                    |                       | C5, CAMP, LBP, PPIA                                                                                                                                                                                                                                                                                                                         |
| Inflammatory Disease, Inflammatory Response, Organismal Injury and Abnormalities, Renal and Urological Disease                                                | 4.4045                    | 1.4670                | ACE, AMBP, C5, CFB, CFH, CRP, IGF1, PPIA                                                                                                                                                                                                                                                                                                    |
| Organismal Injury and Abnormalities, Reproductive System Disease                                                                                              | 4.3947                    |                       | C5, F5, FGG, PPIA                                                                                                                                                                                                                                                                                                                           |
| Cardiovascular System Development and Function, Cellular Movement                                                                                             | 4.3605                    | -1.7390               | C5, HSPA5, IGF1, NRP1, PKM, PROS1                                                                                                                                                                                                                                                                                                           |



Table S1. *Cont.*

| Ingenuity Canonical Pathways                                                                  | -log ( <i>p</i><br>value) | Activation<br>z-score | Molecules                                                                                                                                                                                                                                                                                                                                                                                                                                   |
|-----------------------------------------------------------------------------------------------|---------------------------|-----------------------|---------------------------------------------------------------------------------------------------------------------------------------------------------------------------------------------------------------------------------------------------------------------------------------------------------------------------------------------------------------------------------------------------------------------------------------------|
| Cancer, Organismal Injury and Abnormalities                                                   | 4.3556                    | 0.2360                | ACE, ACTBL2, AHSG, ALDOB, AMBP, APOA1, BHMT, C2, C5, C8G, C9, CAMP, CEP250, CFB, CFH, COL24A1, COLEC11, CRP, DYNC1H1, F12, F5, FGG, HABP2, HLA-A, HP, HPX, HSPA5, HSPA8, IGF1, ITIH1, ITIH2, ITIH3, ITIH4, LAP3, LCP1, LOXL1, LTF, MST1, MYOCD, NRP1, PGLYRP2, PI16, PKM, PM20D1, PPIA, PRDX2, PROS1, PROZ, PSAP, PSMA7, SAA2-SAA4, SERPINA10, SERPINF1                                                                                     |
| Cancer, Gastrointestinal Disease, Hepatic System Disease, Organismal Injury and Abnormalities | 4.3507                    |                       | ACE, ALDOB, APOA1, BHMT, C5, C9, CEP250, CFB, COL24A1, DYNC1H1, F12, F5, FGG, HABP2, HP, HPX, HSPA5, HSPA8, IGF1, ITIH1, ITIH2, ITIH4, LAP3, LOXL1, MYOCD, PI16, PKM, PM20D1, PROZ, PSAP, SAA2-SAA4, SERPINA10                                                                                                                                                                                                                              |
| Cell-To-Cell Signaling and Interaction                                                        | 4.3429                    |                       | C5, CAMP, IGF1                                                                                                                                                                                                                                                                                                                                                                                                                              |
| Gastrointestinal Disease, Organismal Injury and Abnormalities                                 | 4.3429                    |                       | C2, C5, CFB                                                                                                                                                                                                                                                                                                                                                                                                                                 |
| Cancer, Gastrointestinal Disease, Hepatic System Disease, Organismal Injury and Abnormalities | 4.3429                    |                       | HSPA5, HSPA8, LAP3                                                                                                                                                                                                                                                                                                                                                                                                                          |
| Cell-To-Cell Signaling and Interaction, Hematological System Development and Function         | 4.3420                    | -0.4470               | APOA1, CRP, FGG, LBP, LCP1, PRDX2                                                                                                                                                                                                                                                                                                                                                                                                           |
| Cancer, Organismal Injury and Abnormalities                                                   | 4.3401                    | -0.1520               | ACE, ACTBL2, AHSG, ALDOB, AMBP, APOA1, BHMT, C2, C5, C8G, C9, CEP250, CFB, CFH, COL24A1, COLEC11, CRP, DYNC1H1, F12, F5, FGG, HABP2, HLA-A, HPX, HSPA5, HSPA8, IGF1, ITIH1, ITIH2, ITIH3, ITIH4, LAP3, LCP1, LOXL1, LTF, MST1, MYOCD, NRP1, PGLYRP2, PI16, PKM, PM20D1, PPIA, PRDX2, PROS1, PROZ, PSMA7, SAA2-SAA4, AMBP, APOA1, BHMT, C5, CAMP, CFH, CRP, HLA-A, HP, HPX, HSPA5, IGF1, MST1, NRP1, PKM, PPIA, PRDX2, PROS1, PSAP, SERPINF1 |
| Tissue Morphology                                                                             | 4.3307                    | -1.1220               |                                                                                                                                                                                                                                                                                                                                                                                                                                             |

Table S1. *Cont.*

| Ingenuity Canonical Pathways                                                                                                                                                                                                                                      | -log ( <i>p</i><br>value) | Activation<br>z-score | Molecules                                                                                                 |
|-------------------------------------------------------------------------------------------------------------------------------------------------------------------------------------------------------------------------------------------------------------------|---------------------------|-----------------------|-----------------------------------------------------------------------------------------------------------|
| Molecular Transport                                                                                                                                                                                                                                               | 4.3298                    | -1.7250               | ACE, APOA1, APOM, CAMP, CRP, FGG, HLA-A, HP, HPX, HSPA5, HSPA8, IGF1, LBP, LTF, PKM, PPIA, PSAP, SERPINF1 |
| Gastrointestinal Disease,<br>Inflammatory Disease                                                                                                                                                                                                                 | 4.3279                    |                       | CAMP, CRP, F5, IGF1, LBP, LTF, PKM                                                                        |
| Cancer, Organismal Injury and<br>Abnormalities                                                                                                                                                                                                                    | 4.3179                    | -0.0230               | AHSG, AMBP, APOA1, C5, CFH, FGG, IGF1, LTF, MYOCD, NRP1, PKM, PPIA, PRDX2, PSAP, SERPINF1                 |
| Inflammatory Disease,<br>Inflammatory Response,<br>Organismal Injury and<br>Abnormalities, Respiratory Disease                                                                                                                                                    | 4.3161                    |                       | ACE, AMBP, C5, CAMP, CRP, HLA-A, HSPA5, LBP                                                               |
| Digestive System Development<br>and Function, Gastrointestinal<br>Disease, Hepatic System<br>Development and Function,<br>Hepatic System Disease,<br>Inflammatory Disease,<br>Inflammatory Response, Organ<br>Development, Organismal Injury<br>and Abnormalities | 4.3054                    |                       | APOA1, C5, HLA-A, HP, HPX, HSPA5, IGF1, PPIA                                                              |
| Cellular Development, Embryonic<br>Development, Nervous System<br>Development and Function, Organ<br>Development, Organismal<br>Development, Tissue<br>Development, Visual System<br>Development and Function                                                     | 4.2967                    |                       | CFH, IGF1, SERPINF1                                                                                       |
| Carbohydrate Metabolism, Lipid<br>Metabolism, Small Molecule<br>Biochemistry                                                                                                                                                                                      | 4.2967                    |                       | IGF1, LBP, PSAP                                                                                           |
| Connective Tissue Disorders,<br>Hematological Disease,<br>Organismal Injury and<br>Abnormalities                                                                                                                                                                  | 4.2907                    |                       | AMBP, CRP, HPX, IGF1, PPIA                                                                                |

Table S1. *Cont.*

| Ingenuity Canonical Pathways                                                                                                                                            | -log ( <i>p</i><br>value) | Activation<br>z-score | Molecules                                                                                                 |
|-------------------------------------------------------------------------------------------------------------------------------------------------------------------------|---------------------------|-----------------------|-----------------------------------------------------------------------------------------------------------|
| Organismal Development                                                                                                                                                  | 4.2882                    |                       | ACE, AMBP, APOA1, BHMT, CFH, COLEC11, HP, HPX, IGF1, LOXL1, MST1, MYOCD, NRP1, PGLYRP2, PPIA, PRDX2, PSAP |
| Free Radical Scavenging                                                                                                                                                 | 4.2874                    | -1.1310               | ACE, C5, CRP, IGF1                                                                                        |
| Cellular Development                                                                                                                                                    | 4.2874                    |                       | CFH, IGF1, MYOCD, PKM                                                                                     |
| Cell-To-Cell Signaling and Interaction, Hematological System Development and Function, Immune Cell Trafficking, Inflammatory Response                                   | 4.2668                    |                       | APOA1, CAMP, LBP, PKM                                                                                     |
| Cellular Growth and Proliferation, Organismal Development                                                                                                               | 4.2510                    |                       | APOA1, CAMP, LTF                                                                                          |
| Cellular Movement, Embryonic Development                                                                                                                                | 4.2510                    |                       | APOA1, CAMP, PPIA                                                                                         |
| Cardiovascular System Development and Function, Cellular Development, Organismal Development, Skeletal and Muscular System Development and Function, Tissue Development | 4.2510                    |                       | CFH, IGF1, MYOCD                                                                                          |
| Organismal Development, Renal and Urological System Development and Function                                                                                            | 4.2510                    |                       | ACE, C5, CFH, IGF1, MST1, MYOCD, PSAP                                                                     |
| Cellular Movement, Hematological System Development and Function, Immune Cell Trafficking, Inflammatory Response                                                        | 4.2510                    | -0.9150               | APOA1, C2, C5, CFB, CFH, LBP                                                                              |
| Cell Death and Survival, Organismal Injury and Abnormalities                                                                                                            | 4.2418                    | -1.5840               | CRP, HSPA5, IGF1, PPIA, PRDX2, SERPINF1                                                                   |
| Dermatological Diseases and Conditions, Organismal Injury and Abnormalities                                                                                             | 4.2284                    |                       | CAMP, CRP, NRP1, PPIA, PSAP                                                                               |

Table S1. *Cont.*

| Ingenuity Canonical Pathways                                                                                    | $-\log(p \text{ value})$ | Activation<br>z-score | Molecules                                                                                                                                                            |
|-----------------------------------------------------------------------------------------------------------------|--------------------------|-----------------------|----------------------------------------------------------------------------------------------------------------------------------------------------------------------|
| Neurological Disease, Organismal Injury and Abnormalities                                                       | 4.2255                   | 0.1470                | ACE, ACTBL2, APOA1, C5, C9, CEP250, CFB, COL24A1, DYNC1H1, F12, F5, HSPA8, IGF1, ITIH2, ITIH4, LOXL1, NRP1, PGLYRP2, PKM, PM20D1, PPIA, PROS1, PROZ, PSAP, SERPINA10 |
| Lipid Metabolism, Molecular Transport, Small Molecule Biochemistry                                              | 4.2204                   |                       | IGF1, PSAP                                                                                                                                                           |
| Molecular Transport                                                                                             | 4.2204                   |                       | CAMP, HSPA8                                                                                                                                                          |
| Cell Death and Survival                                                                                         | 4.2204                   |                       | CAMP, LTF                                                                                                                                                            |
| Infectious Diseases                                                                                             | 4.2204                   |                       | C5, C9                                                                                                                                                               |
| Infectious Diseases                                                                                             | 4.2204                   |                       | C5, C9                                                                                                                                                               |
| Cell Morphology, Organ Morphology, Organismal Development, Renal and Urological System Development and Function | 4.2204                   |                       | C5, CFH                                                                                                                                                              |
| Cell-To-Cell Signaling and Interaction                                                                          | 4.2204                   |                       | CAMP, CFH                                                                                                                                                            |
| DNA Replication, Recombination, and Repair                                                                      | 4.2204                   |                       | CAMP, PPIA                                                                                                                                                           |
| Cell Death and Survival, Organismal Injury and Abnormalities, Renal and Urological Disease                      | 4.2076                   |                       | IGF1, MST1, PKM                                                                                                                                                      |
| Cell Death and Survival, Nervous System Development and Function                                                | 4.2076                   |                       | C5, IGF1, SERPINF1                                                                                                                                                   |
| Cardiovascular System Development and Function                                                                  | 4.1765                   |                       | ACE, CFH, IGF1, MYOCD, NRP1, PPIA, PROS1, PSAP                                                                                                                       |
| Carbohydrate Metabolism                                                                                         | 4.1701                   | -1.4890               | ACE, AHSG, APOA1, C5, HSPA5, IGF1, PKM                                                                                                                               |
| Cellular Movement, Renal and Urological System Development and Function                                         | 4.1656                   |                       | APOA1, CAMP, PPIA                                                                                                                                                    |
| Cellular Movement                                                                                               | 4.1506                   | -1.2880               | APOA1, C5, CAMP, HP, LBP, MST1, PPIA                                                                                                                                 |

Table S1. *Cont.*

| Ingenuity Canonical Pathways                                                                                                                         | -log ( <i>p</i><br>value) | Activation<br>z-score | Molecules                                                                                                                                                                                                                                                                                                      |
|------------------------------------------------------------------------------------------------------------------------------------------------------|---------------------------|-----------------------|----------------------------------------------------------------------------------------------------------------------------------------------------------------------------------------------------------------------------------------------------------------------------------------------------------------|
| Cell-To-Cell Signaling and<br>Interaction, Hematological System                                                                                      |                           |                       |                                                                                                                                                                                                                                                                                                                |
| Development and Function,<br>Immune Cell Trafficking,<br>Inflammatory Response                                                                       | 4.1481                    | -2.0000               | C5, CAMP, LBP, PPIA                                                                                                                                                                                                                                                                                            |
| Hereditary Disorder, Ophthalmic<br>Disease, Organismal Injury and<br>Abnormalities                                                                   | 4.1469                    |                       | C2, C9, CEP250, CFB, CFH, PSAP                                                                                                                                                                                                                                                                                 |
| Molecular Transport                                                                                                                                  | 4.1367                    | -1.0110               | C5, HLA-A, HP, HPX, HSPA5, IGF1, LTF, PPIA, PRDX2                                                                                                                                                                                                                                                              |
| Cancer, Organismal Injury and<br>Abnormalities                                                                                                       | 4.1232                    | -0.0230               | AHSG, AMBP, APOA1, C5, FGG, IGF1, LTF, MYOCD, NRP1,<br>PKM, PPIA, PRDX2, PSAP, SERPINF1                                                                                                                                                                                                                        |
| Organismal Injury and<br>Abnormalities, Renal and<br>Urological Disease                                                                              | 4.1203                    |                       | ACE, C5, CRP, F5, PPIA                                                                                                                                                                                                                                                                                         |
| Cell Death and Survival                                                                                                                              | 4.1101                    | -1.1920               | IGF1, NRP1, PKM, PRDX2                                                                                                                                                                                                                                                                                         |
| Immunological Disease,<br>Inflammatory Disease,<br>Inflammatory Response,<br>Organismal Injury and<br>Abnormalities, Renal and<br>Urological Disease | 4.1101                    |                       | ACE, CFH, CRP, PPIA                                                                                                                                                                                                                                                                                            |
| Lipid Metabolism, Small Molecule<br>Biochemistry                                                                                                     | 4.1090                    | -1.7040               | APOA1, APOM, C5, CAMP, HSPA8, IGF1, LBP, LTF, PKM,<br>PSAP                                                                                                                                                                                                                                                     |
| Cellular Movement                                                                                                                                    | 4.1085                    | -1.3420               | AHSG, IGF1, LTF, MST1, SERPINF1                                                                                                                                                                                                                                                                                |
| Cardiovascular Disease,<br>Organismal Injury and<br>Abnormalities                                                                                    | 4.1051                    |                       | ACE, C5, CFB, CFH, HLA-A, PPIA                                                                                                                                                                                                                                                                                 |
| Cancer, Organismal Injury and<br>Abnormalities                                                                                                       | 4.0910                    |                       | ACE, ACTBL2, ALDOB, APOA1, C2, C5, C9, CAMP, CEP250,<br>CFB, CFH, COL24A1, COLEC11, CRP, DYNC1H1, F5, FGG,<br>HABP2, HLA-A, HP, HPX, HSPA5, HSPA8, IGF1, ITIH1,<br>ITIH2, ITIH3, ITIH4, LAP3, LBP, LCP1, LOXL1, LTF, MST1,<br>MYOCD, NRP1, PI16, PKM, PM20D1, PPIA, PROS1, PSAP,<br>PSMA7, SAA2-SAA4, SERPINF1 |

Table S1. *Cont.*

| Ingenuity Canonical Pathways                                                                                                                      | -log ( <i>p</i><br>value) | Activation<br>z-score | Molecules                                                                         |
|---------------------------------------------------------------------------------------------------------------------------------------------------|---------------------------|-----------------------|-----------------------------------------------------------------------------------|
| Cellular Development, Cellular Growth and Proliferation, Hematological System Development and Function, Lymphoid Tissue Structure and Development | 4.0894                    | -0.4530               | CAMP, CRP, HPX, HSPA5, HSPA8, IGF1, LCP1, LTF, PRDX2, Serpina3g (includes others) |
| Inflammatory Disease, Inflammatory Response, Organismal Injury and Abnormalities, Respiratory Disease                                             | 4.0857                    |                       | ACE, C5, CAMP, CRP, LBP                                                           |
| Hereditary Disorder, Immunological Disease, Organismal Injury and Abnormalities                                                                   | 4.0742                    |                       | C2, C5, CFB, FGG, IGF1                                                            |
| Cellular Function and Maintenance                                                                                                                 | 4.0660                    | -1.1540               | ACE, APOA1, CAMP, CFH, CRP, PKM, PROS1                                            |
| Cellular Movement, Hematological System Development and Function, Immune Cell Trafficking, Inflammatory Response                                  | 4.0535                    | -1.2900               | APOA1, C5, CAMP, HP, LBP, MST1, PPIA                                              |
| Cardiovascular System Development and Function, Tissue Development                                                                                | 4.0477                    |                       | CAMP, LTF, NRP1                                                                   |
| Cellular Movement, Hematological System Development and Function, Immune Cell Trafficking, Inflammatory Response                                  | 4.0477                    |                       | APOA1, LCP1, PPIA                                                                 |
| Carbohydrate Metabolism, Small Molecule Biochemistry                                                                                              | 4.0453                    |                       | APOA1, CAMP                                                                       |
| Hereditary Disorder, Ophthalmic Disease, Organismal Injury and Abnormalities                                                                      | 4.0453                    |                       | C9, CFH                                                                           |
| Cell Death and Survival                                                                                                                           | 4.0453                    |                       | CAMP, LTF                                                                         |
| Hematological Disease                                                                                                                             | 4.0453                    |                       | C5, HPX                                                                           |

Table S1. *Cont.*

| Ingenuity Canonical Pathways                                                                                                                      | -log ( <i>p</i><br>value) | Activation<br>z-score | Molecules                                           |
|---------------------------------------------------------------------------------------------------------------------------------------------------|---------------------------|-----------------------|-----------------------------------------------------|
| Gastrointestinal Disease, Hepatic<br>System Disease, Organismal Injury<br>and Abnormalities                                                       | 4.0348                    |                       | APOA1, C5, CRP, FGG, HP, HPX, PPIA                  |
| Cellular Assembly and<br>Organization, Cellular Function<br>and Maintenance                                                                       | 4.0106                    |                       | C5, CAMP, FGG                                       |
| Cardiovascular Disease,<br>Organismal Injury and<br>Abnormalities, Renal and<br>Urological Disease                                                | 4.0106                    |                       | C5, CFB, COLEC11                                    |
| Cell-To-Cell Signaling and<br>Interaction, Hematological System<br>Development and Function,<br>Immune Cell Trafficking,<br>Inflammatory Response | 4.0074                    | -1.9690               | C5, CAMP, HLA-A, HPX, IGF1, LBP, LTF, PGLYRP2, PPIA |
| Cardiovascular Disease<br>Cell-To-Cell Signaling and<br>Interaction, Cellular Growth and<br>Proliferation                                         | 3.9914                    |                       | APOA1, CRP, F5, FGG, IGF1, MYOCD, PPIA              |
| Cellular Movement<br>Cellular Movement, Organismal<br>Injury and Abnormalities,<br>Respiratory Disease                                            | 3.9914                    | -2.6030               | APOA1, C5, CAMP, IGF1, LTF, MST1, PSAP              |
| Cardiovascular Disease,<br>Neurological Disease, Organismal<br>Injury and Abnormalities                                                           | 3.9747                    |                       | CAMP, IGF1, SERPINF1                                |
| Cellular Compromise<br>Organ Morphology, Organismal<br>Development, Renal and<br>Urological System Development<br>and Function                    | 3.9666                    |                       | C2, C5, CFB, HSPA5                                  |
|                                                                                                                                                   | 3.9508                    |                       | APOA1, F5, IGF1, PROS1                              |
|                                                                                                                                                   | 3.9508                    | 1.9250                | CFH, HP, HPX, IGF1                                  |
|                                                                                                                                                   | 3.9469                    |                       | ACE, C5, CFH, COLEC11, HP, IGF1, PSAP               |

Table S1. *Cont.*

| Ingenuity Canonical Pathways                                                                                                                      | -log ( <i>p</i><br>value) | Activation<br>z-score | Molecules                                                                                      |
|---------------------------------------------------------------------------------------------------------------------------------------------------|---------------------------|-----------------------|------------------------------------------------------------------------------------------------|
| Cellular Development, Cellular Growth and Proliferation, Hematological System Development and Function, Lymphoid Tissue Structure and Development | 3.9208                    | -0.5640               | CAMP, CRP, HPX, HSPA5, HSPA8, IGF1, LCP1, LTF, PPIA, PRDX2, Serpina3g (includes others)        |
| Cellular Development, Cellular Growth and Proliferation                                                                                           | 3.9208                    | -0.1560               | APOA1, CAMP, CRP, HPX, HSPA5, HSPA8, IGF1, LCP1, LTF, PPIA, PRDX2, Serpina3g (includes others) |
| Cell Signaling, Inflammatory Response                                                                                                             | 3.8996                    |                       | CFB, CFH                                                                                       |
| Cardiovascular Disease                                                                                                                            | 3.8996                    |                       | ACE, CRP                                                                                       |
| Cell Death and Survival                                                                                                                           | 3.8996                    |                       | CAMP, CFH                                                                                      |
| Cardiovascular Disease, Organismal Injury and Abnormalities, Skeletal and Muscular Disorders                                                      | 3.8996                    |                       | C5, IGF1                                                                                       |
| Cellular Movement, Hematological System Development and Function, Immune Cell Trafficking, Inflammatory Response                                  | 3.8996                    |                       | C5, MST1                                                                                       |
| Organismal Injury and Abnormalities                                                                                                               | 3.8928                    |                       | C5, CAMP, CFB, CRP, IGF1, LTF                                                                  |
| Organismal Injury and Abnormalities, Renal and Urological Disease                                                                                 | 3.8761                    | 0.7840                | ACE, CFB, CFH, CRP, MST1, PKM, PSAP                                                            |
| Hereditary Disorder, Immunological Disease, Organismal Injury and Abnormalities                                                                   | 3.8761                    |                       | C2, C5, CFB, FGG, IGF1, PPIA                                                                   |
| Cellular Function and Maintenance                                                                                                                 | 3.8729                    |                       | C5, HP, PROS1                                                                                  |



Table S1. *Cont.*

| Ingenuity Canonical Pathways                                                                                                                                  | -log ( <i>p</i><br>value) | Activation<br>z-score | Molecules                                                                                                                         |
|---------------------------------------------------------------------------------------------------------------------------------------------------------------|---------------------------|-----------------------|-----------------------------------------------------------------------------------------------------------------------------------|
| Connective Tissue Disorders,<br>Inflammatory Disease,<br>Inflammatory Response,<br>Organismal Injury and<br>Abnormalities, Skeletal and<br>Muscular Disorders | 3.8697                    | -1.0000               | APOA1, C5, CFB, FGG, PKM                                                                                                          |
| Cardiovascular Disease,<br>Organismal Injury and<br>Abnormalities                                                                                             | 3.8697                    |                       | APOA1, CRP, F5, FGG                                                                                                               |
| Respiratory Disease                                                                                                                                           | 3.8539                    |                       | CRP, HSPA8, IGF1, LBP, LCP1, LOXL1, LTF, PRDX2                                                                                    |
| Hereditary Disorder, Neurological<br>Disease, Organismal Injury and<br>Abnormalities                                                                          | 3.8539                    |                       | ACE, AHSG, APOA1, C5, C9, CEP250, CRP, DYNC1H1,<br>FGG, HP, HSPA5, HSPA8, IGF1, ITIH3, ITIH4, PKM, PPIA,<br>PRDX2, PSAP, SERPINF1 |
| Metabolic Disease, Organismal<br>Injury and Abnormalities, Renal<br>and Urological Disease                                                                    | 3.8539                    |                       | ACE, CFH, CRP, PKM                                                                                                                |
| Gastrointestinal Disease,<br>Inflammatory Disease,<br>Inflammatory Response,<br>Organismal Injury and<br>Abnormalities                                        | 3.8386                    |                       | CAMP, CFB, HP, Retnlg, Serpina3g (includes others)                                                                                |
| Carbohydrate Metabolism,<br>Molecular Transport, Small<br>Molecule Biochemistry                                                                               | 3.8327                    | -1.1610               | ACE, AHSG, APOA1, HSPA5, IGF1, PKM                                                                                                |
| Cardiovascular Disease,<br>Cardiovascular System<br>Development and Function,<br>Organismal Injury and<br>Abnormalities                                       | 3.8297                    |                       | ACE, CFH, IGF1, MYOCD, NRP1, PROS1, PSAP                                                                                          |
| Connective Tissue Disorders,<br>Organismal Injury and<br>Abnormalities, Skeletal and<br>Muscular Disorders, Tissue<br>Morphology                              | 3.8297                    | -1.9820               | C5, CFB, IGF1, PKM, PRDX2                                                                                                         |

Table S1. *Cont.*

| Ingenuity Canonical Pathways                                                                                                                                                                                                                                                                                                                           | -log ( <i>p</i><br>value) | Activation<br>z-score | Molecules                                                                                                      |
|--------------------------------------------------------------------------------------------------------------------------------------------------------------------------------------------------------------------------------------------------------------------------------------------------------------------------------------------------------|---------------------------|-----------------------|----------------------------------------------------------------------------------------------------------------|
| Cell-mediated Immune Response,<br>Cellular Development, Cellular<br>Function and Maintenance,<br>Cellular Growth and Proliferation,<br>Embryonic Development,<br>Hematological System<br>Development and Function,<br>Hematopoiesis, Lymphoid Tissue<br>Structure and Development, Organ<br>Development, Organismal<br>Development, Tissue Development | 3.7905                    | 0.8160                | CRP, F5, HLA-A, HPX, IGF1, PGLYRP2, PKM, PRDX2, PSAP                                                           |
| Cell Death and Survival                                                                                                                                                                                                                                                                                                                                | 3.7747                    |                       | CAMP, CRP, IGF1, LTF                                                                                           |
| Cellular Movement, Hematological<br>System Development and<br>Function, Immune Cell Trafficking,<br>Inflammatory Response                                                                                                                                                                                                                              | 3.7747                    |                       | C5, CAMP                                                                                                       |
| Lipid Metabolism, Small Molecule<br>Biochemistry                                                                                                                                                                                                                                                                                                       | 3.7747                    |                       | LBP, PSAP                                                                                                      |
| Cellular Movement, Hematological<br>System Development and<br>Function, Immune Cell Trafficking,<br>Inflammatory Response                                                                                                                                                                                                                              | 3.7696                    | -0.2230               | APOA1, C5, CAMP, LBP, PPIA                                                                                     |
| Cell Death and Survival                                                                                                                                                                                                                                                                                                                                | 3.7670                    | -2.4290               | ACE, APOA1, C5, CAMP, CFH, HLA-A, HSPA5, HSPA8,<br>IGF1, LTF, NRP1, PKM, PPIA, PRDX2, PSAP, PSMA7,<br>SERPINF1 |
| Organismal Injury and<br>Abnormalities, Renal and<br>Urological Disease                                                                                                                                                                                                                                                                                | 3.7471                    |                       | AHSG, AMBP, C5, PKM                                                                                            |
| Inflammatory Response,<br>Neurological Disease                                                                                                                                                                                                                                                                                                         | 3.7282                    | 0.5790                | C5, CRP, F12, F5, HLA-A, HPX, HSPA5, IGF1                                                                      |
| Hereditary Disorder, Neurological<br>Disease, Organismal Injury and<br>Abnormalities                                                                                                                                                                                                                                                                   | 3.7212                    |                       | ACE, AHSG, C5, C9, CRP, DYNC1H1, FGG, HP, HSPA5,<br>HSPA8, IGF1, ITIH3, ITIH4, PKM, PPIA, PRDX2, PSAP          |

Table S1. *Cont.*

| Ingenuity Canonical Pathways                                                                                                                                                                                                                           | -log ( <i>p</i><br>value) | Activation<br>z-score | Molecules                                                  |
|--------------------------------------------------------------------------------------------------------------------------------------------------------------------------------------------------------------------------------------------------------|---------------------------|-----------------------|------------------------------------------------------------|
| Lipid Metabolism, Molecular Transport, Small Molecule Biochemistry                                                                                                                                                                                     | 3.7190                    | -1.9020               | APOA1, APOM, HSPA8, IGF1, LBP, PSAP                        |
| Cell Death and Survival                                                                                                                                                                                                                                | 3.7167                    | -0.3710               | C9, CFB, CFH, HLA-A                                        |
| Lipid Metabolism, Molecular Transport, Small Molecule Biochemistry                                                                                                                                                                                     | 3.7122                    | -1.0440               | APOA1, APOM, BHMT, CRP, HP, IGF1, PKM                      |
| Cell-To-Cell Signaling and Interaction                                                                                                                                                                                                                 | 3.7055                    | -1.1310               | C5, CRP, HSPA5, IGF1, PKM, PROS1                           |
| Cell-To-Cell Signaling and Interaction, Hematological System Development and Function, Immune Cell Trafficking, Inflammatory Response                                                                                                                  | 3.7033                    | -1.1030               | APOA1, C5, CFH, LCP1                                       |
| Cellular Development, Cellular Growth and Proliferation, Embryonic Development, Hematological System Development and Function, Hematopoiesis, Lymphoid Tissue Structure and Development, Organ Development, Organismal Development, Tissue Development | 3.6990                    | 0.2270                | CRP, F5, HLA-A, HPX, IGF1, LCP1, PGLYRP2, PKM, PRDX2, PSAP |
| Immunological Disease                                                                                                                                                                                                                                  | 3.6968                    | 1.0670                | C5, CAMP, CFH, HLA-A, HSPA5, LBP, PPIA, PSAP               |
| Endocrine System Disorders, Gastrointestinal Disease, Metabolic Disease, Ophthalmic Disease, Organismal Injury and Abnormalities                                                                                                                       | 3.6904                    |                       | CRP, IGF1, SERPINF1                                        |
| Cardiovascular Disease, Organismal Injury and Abnormalities, Skeletal and Muscular Disorders                                                                                                                                                           | 3.6840                    |                       | ACE, APOA1, C5, CRP, FGG, PPIA                             |
| Molecular Transport                                                                                                                                                                                                                                    | 3.6737                    | 0.3990                | HLA-A, HP, HPX, LTF                                        |

Table S1. *Cont.*

| Ingenuity Canonical Pathways                                                                                                                                                                               | -log ( <i>p</i><br>value) | Activation<br>z-score | Molecules                                                                                                                                                                                                                                                                                                                                                            |
|------------------------------------------------------------------------------------------------------------------------------------------------------------------------------------------------------------|---------------------------|-----------------------|----------------------------------------------------------------------------------------------------------------------------------------------------------------------------------------------------------------------------------------------------------------------------------------------------------------------------------------------------------------------|
| Gastrointestinal Disease,<br>Inflammatory Disease                                                                                                                                                          | 3.6696                    |                       | CAMP, CRP, F5, IGF1, LBP, LTF, PKM, Serpina3g (includes<br>others)                                                                                                                                                                                                                                                                                                   |
| Cardiovascular Disease, Cell Death<br>and Survival, Connective Tissue<br>Disorders, Hematological Disease,<br>Hereditary Disorder, Organismal<br>Injury and Abnormalities, Renal<br>and Urological Disease | 3.6676                    |                       | CFB, CFH                                                                                                                                                                                                                                                                                                                                                             |
| Cardiovascular Disease,<br>Hematological Disease,<br>Organismal Injury and<br>Abnormalities, Renal and<br>Urological Disease                                                                               | 3.6676                    |                       | C2, CFB                                                                                                                                                                                                                                                                                                                                                              |
| Cell Death and Survival, Nervous<br>System Development and Function                                                                                                                                        | 3.6676                    |                       | IGF1, SERPINF1                                                                                                                                                                                                                                                                                                                                                       |
| Lipid Metabolism, Small Molecule<br>Biochemistry                                                                                                                                                           | 3.6635                    | -1.6980               | APOA1, APOM, C5, HSPA5, IGF1, PRDX2                                                                                                                                                                                                                                                                                                                                  |
| Cellular Assembly and<br>Organization, Tissue Development                                                                                                                                                  | 3.6635                    |                       | ACE, HSPA5, IGF1                                                                                                                                                                                                                                                                                                                                                     |
| Cardiovascular Disease,<br>Connective Tissue Disorders,<br>Hematological Disease, Hereditary<br>Disorder, Organismal Injury and<br>Abnormalities                                                           | 3.6596                    |                       | AMBP, CRP, HPX, IGF1                                                                                                                                                                                                                                                                                                                                                 |
| Cellular Function and Maintenance                                                                                                                                                                          | 3.6576                    | -1.3870               | ACE, APOA1, C5, CAMP, PROS1                                                                                                                                                                                                                                                                                                                                          |
| Organismal Injury and<br>Abnormalities                                                                                                                                                                     | 3.6536                    | 1.0910                | ACE, APOA1, C5, CRP, FGG, HP, HPX, HSPA5, IGF1,<br>MYOCD, PPIA                                                                                                                                                                                                                                                                                                       |
| Cancer, Gastrointestinal Disease,<br>Organismal Injury and<br>Abnormalities                                                                                                                                | 3.6364                    | 0.4980                | ACE, ACTBL2, AHSG, ALDOB, AMBP, APOA1, BHMT, C2,<br>C5, C8G, C9, CAMP, CEP250, CFB, CFH, COL24A1,<br>COLEC11, CRP, DYNC1H1, F12, F5, FGG, HABP2, HLA-A,<br>HP, HPX, HSPA5, HSPA8, IGF1, ITIH1, ITIH2, ITIH3, ITIH4,<br>LAP3, LBP, LCP1, LOXL1, LTF, MST1, MYOCD, NRP1,<br>PGLYRP2, PI16, PKM, PM20D1, PPIA, PRDX2, PROS1,<br>PROZ, PSAP, PSMA7, SAA2-SAA4, SERPINA10 |

Table S1. *Cont.*

| Ingenuity Canonical Pathways                                                                                                                                                                                                                                                                                                                   | -log ( <i>p</i><br>value) | Activation<br>z-score | Molecules                                                                             |
|------------------------------------------------------------------------------------------------------------------------------------------------------------------------------------------------------------------------------------------------------------------------------------------------------------------------------------------------|---------------------------|-----------------------|---------------------------------------------------------------------------------------|
| Connective Tissue Disorders,<br>Organismal Injury and<br>Abnormalities, Tissue Morphology                                                                                                                                                                                                                                                      | 3.6364                    |                       | ACE, APOA1, IGF1                                                                      |
| Cell Death and Survival, Nervous<br>System Development and Function                                                                                                                                                                                                                                                                            | 3.6364                    |                       | HLA-A, IGF1, SERPINF1                                                                 |
| Post-Translational Modification,<br>Protein Degradation, Protein<br>Synthesis                                                                                                                                                                                                                                                                  | 3.6308                    | -1.0670               | ACE, C5, F12, HABP2, HSPA8, IGF1                                                      |
| Endocrine System Disorders,<br>Metabolic Disease, Organismal<br>Injury and Abnormalities                                                                                                                                                                                                                                                       | 3.6003                    |                       | ACE, AHSG, APOA1, CRP, LBP, LTF, PRDX2                                                |
| Cancer, Organismal Injury and<br>Abnormalities                                                                                                                                                                                                                                                                                                 | 3.5952                    |                       | APOA1, BHMT, CFB, CFH, COL24A1, CRP, HLA-A, HP,<br>IGF1, NRP1, PRDX2, SERPINF1        |
| Nutritional Disease                                                                                                                                                                                                                                                                                                                            | 3.5784                    | 1.9820                | APOA1, IGF1, LTF, MYOCD, PGLYRP2, PSAP                                                |
| Cardiovascular Disease                                                                                                                                                                                                                                                                                                                         | 3.5784                    | -2.0000               | C5, CFB, COLEC11, PKM                                                                 |
| Organismal Injury and<br>Abnormalities                                                                                                                                                                                                                                                                                                         | 3.5768                    | -1.1650               | APOA1, BHMT, CFB, CFH, COL24A1, CRP, HLA-A, HP,<br>IGF1, NRP1, PRDX2, PROS1, SERPINF1 |
| Cell Death and Survival, Cell<br>Morphology, Embryonic<br>Development, Nervous System<br>Development and Function,<br>Ophthalmic Disease, Organ<br>Development, Organ Morphology,<br>Organismal Development,<br>Organismal Injury and<br>Abnormalities, Tissue<br>Development, Tissue Morphology,<br>Visual System Development and<br>Function | 3.5702                    |                       | IGF1, SERPINF1                                                                        |
| Cardiovascular Disease,<br>Hematological Disease, Metabolic<br>Disease, Organismal Injury and<br>Abnormalities                                                                                                                                                                                                                                 | 3.5654                    |                       | APOA1, CRP, LBP, PPIA                                                                 |

Table S1. *Cont.*

| Ingenuity Canonical Pathways                                                                                                                                                                             | -log ( <i>p</i><br>value) | Activation<br>z-score | Molecules                                                                                                                                                                                                                                                                                                      |
|----------------------------------------------------------------------------------------------------------------------------------------------------------------------------------------------------------|---------------------------|-----------------------|----------------------------------------------------------------------------------------------------------------------------------------------------------------------------------------------------------------------------------------------------------------------------------------------------------------|
| Lipid Metabolism, Molecular<br>Transport, Small Molecule<br>Biochemistry<br>Hematological System<br>Development and Function, Tissue<br>Morphology                                                       | 3.5591                    | 0.7710                | AHSG, APOA1, APOM, BHMT, CRP, IGF1, SAA2-SAA4                                                                                                                                                                                                                                                                  |
| Cancer, Organismal Injury and<br>Abnormalities                                                                                                                                                           | 3.5528                    | 0.0720                | AMBP, APOA1, C5, CAMP, CFH, CRP, HLA-A, HPX, IGF1,<br>PPIA, PRDX2, PROS1, PSAP                                                                                                                                                                                                                                 |
| Cell-To-Cell Signaling and<br>Interaction, Hematological System<br>Development and Function,<br>Immune Cell Trafficking,<br>Inflammatory Response<br>Molecular Transport, Small<br>Molecule Biochemistry | 3.5361                    |                       | ACTBL2, APOA1, C2, C5, C8G, C9, CEP250, CFB, CFH,<br>COL24A1, CRP, DYNC1H1, F12, F5, FGG, HLA-A, HP, HPX,<br>HSPA5, IGF1, ITIH3, ITIH4, LBP, LCP1, LOXL1, LTF, MST1,<br>MYOCD, NRP1, PI16, PKM, PM20D1, PPIA, PROS1, PROZ,<br>PSMA7, SERPINF1                                                                  |
| Organismal Development<br>Gastrointestinal Disease,<br>Immunological Disease,<br>Ophthalmic Disease, Organismal<br>Injury and Abnormalities                                                              | 3.5317                    |                       | CRP, LCP1, PRDX2                                                                                                                                                                                                                                                                                               |
| Dermatological Diseases and<br>Conditions, Organismal Injury and<br>Abnormalities                                                                                                                        | 3.5317                    |                       | C5, CAMP, F5                                                                                                                                                                                                                                                                                                   |
|                                                                                                                                                                                                          | 3.5003                    | -0.5550               | APOA1, F12, NRP1, PROS1, SERPINF1                                                                                                                                                                                                                                                                              |
|                                                                                                                                                                                                          | 3.5003                    |                       | APOA1, CRP, HP, PPIA                                                                                                                                                                                                                                                                                           |
|                                                                                                                                                                                                          | 3.4935                    | -1.3530               | ACE, AHSG, ALDOB, AMBP, APOA1, BHMT, C2, C5, C9,<br>CAMP, CEP250, CFB, CFH, COL24A1, COLEC11, CRP,<br>DYNC1H1, F12, F5, FGG, HABP2, HLA-A, HP, HPX, HSPA5,<br>HSPA8, IGF1, ITIH1, ITIH2, ITIH3, LBP, LCP1, LTF, MST1,<br>MYOCD, NRP1, PGLYRP2, PI16, PKM, PPIA, PROS1, PSAP,<br>SAA2-SAA4, SERPINA10, SERPINF1 |

Table S1. *Cont.*

| Ingenuity Canonical Pathways                                                                                         | -log ( <i>p</i><br>value) | Activation<br>z-score | Molecules                                                                                                                                                                                                                                                                                                                                                    |
|----------------------------------------------------------------------------------------------------------------------|---------------------------|-----------------------|--------------------------------------------------------------------------------------------------------------------------------------------------------------------------------------------------------------------------------------------------------------------------------------------------------------------------------------------------------------|
| Cancer, Organismal Injury and Abnormalities                                                                          | 3.4935                    | -0.0420               | ACE, ACTBL2, AHSG, ALDOB, AMBP, APOA1, BHMT, C2, C5, C8G, C9, CAMP, CEP250, CFB, CFH, COL24A1, COLEC11, CRP, DYNC1H1, F12, F5, FGG, HABP2, HLA-A, HP, HPX, HSPA5, HSPA8, IGF1, ITIH1, ITIH2, ITIH3, ITIH4, LAP3, LBP, LCP1, LOXL1, LTF, MST1, MYOCD, NRP1, PGLYRP2, PI16, PKM, PM20D1, PPIA, PRDX2, PROS1, PROZ, PSAP, PSMA7, SAA2-SAA4, SERPINA10, SERPINF1 |
| Hereditary Disorder, Organismal Injury and Abnormalities, Skeletal and Muscular Disorders                            | 3.4895                    |                       | ACE, DYNC1H1, HLA-A, IGF1, LBP, LOXL1, PSAP                                                                                                                                                                                                                                                                                                                  |
| Cellular Function and Maintenance                                                                                    | 3.4841                    |                       | C5, CFH                                                                                                                                                                                                                                                                                                                                                      |
| Cell Signaling                                                                                                       | 3.4841                    |                       | MST1, NRP1                                                                                                                                                                                                                                                                                                                                                   |
| Carbohydrate Metabolism, Small Molecule Biochemistry                                                                 | 3.4841                    |                       | CFH, IGF1, ITIH2                                                                                                                                                                                                                                                                                                                                             |
| Inflammatory Disease, Inflammatory Response, Organismal Injury and Abnormalities, Respiratory Disease                | 3.4802                    |                       | APOA1, C5, CRP, HSPA5, IGF1, LTF, PPIA                                                                                                                                                                                                                                                                                                                       |
| Cancer, Organismal Injury and Abnormalities                                                                          | 3.4776                    |                       | ACE, ACTBL2, ALDOB, APOA1, C2, C5, C8G, C9, CAMP, CFB, CFH, COL24A1, COLEC11, CRP, DYNC1H1, F5, FGG, HABP2, HLA-A, HP, HPX, HSPA5, HSPA8, IGF1, ITIH1, ITIH2, ITIH3, ITIH4, LAP3, LCP1, LOXL1, LTF, MST1, MYOCD, NRP1, PKM, PM20D1, PPIA, PROS1, PSAP, PSMA7, SAA2-SAA4, SERPINF1                                                                            |
| Developmental Disorder, Hereditary Disorder, Organismal Injury and Abnormalities, Skeletal and Muscular Disorders    | 3.4763                    |                       | ACE, HLA-A, LBP, LOXL1, PSAP                                                                                                                                                                                                                                                                                                                                 |
| Cellular Movement, Hematological System Development and Function, Hypersensitivity Response, Immune Cell Trafficking | 3.4750                    | 0.6050                | C5, CAMP, LTF, PPIA                                                                                                                                                                                                                                                                                                                                          |
| Organismal Development                                                                                               | 3.4711                    | -0.9700               | ACE, HABP2, IGF1, NRP1, PPIA, SERPINF1                                                                                                                                                                                                                                                                                                                       |
| Lipid Metabolism, Small Molecule Biochemistry                                                                        | 3.4685                    | -1.7680               | APOA1, APOM, BHMT, C5, CAMP, HSPA5, HSPA8, IGF1, LTF, PKM, PRDX2                                                                                                                                                                                                                                                                                             |

Table S1. *Cont*

| Ingenuity Canonical Pathways                                                                                                                                            | -log ( <i>p</i><br>value) | Activation<br>z-score | Molecules                        |
|-------------------------------------------------------------------------------------------------------------------------------------------------------------------------|---------------------------|-----------------------|----------------------------------|
| Cardiovascular System                                                                                                                                                   |                           |                       |                                  |
| Development and Function, Tissue Morphology                                                                                                                             | 3.4597                    |                       | APOA1, CRP, IGF1                 |
| Cellular Development, Cellular Growth and Proliferation, Organ Development, Renal and Urological System Development and Function                                        | 3.4597                    |                       | C5, IGF1, MST1                   |
| Organismal Injury and Abnormalities, Reproductive System Disease                                                                                                        | 3.4597                    |                       | C5, F5, PPIA                     |
| Cell Death and Survival, Organismal Injury and Abnormalities                                                                                                            | 3.4597                    | -1.5130               | CRP, HSPA5, IGF1, PPIA, SERPINF1 |
| Nucleic Acid Metabolism, Small Molecule Biochemistry                                                                                                                    | 3.4437                    |                       | ACE, APOA1, CFH, HSPA8, PKM      |
| Cardiovascular System Development and Function, Ophthalmic Disease, Organismal Development, Organismal Injury and Abnormalities, Visual System Development and Function | 3.4365                    |                       | IGF1, NRP1, SERPINF1             |
| Inflammatory Disease, Organismal Injury and Abnormalities, Respiratory Disease                                                                                          | 3.4260                    |                       | ACE, C5, F12, HABP2              |
| Cell-To-Cell Signaling and Interaction, Inflammatory Response                                                                                                           | 3.4191                    | -1.1810               | ACE, APOA1, C5, CAMP, PROS1      |
| Dermatological Diseases and Conditions, Organismal Injury and Abnormalities                                                                                             | 3.4145                    |                       | C5, PPIA, PROS1                  |
| Cell Death and Survival                                                                                                                                                 | 3.4056                    |                       | CAMP, LTF                        |
| Cardiovascular Disease, Cellular Compromise, Organismal Injury and Abnormalities                                                                                        | 3.4056                    |                       | HP, HPX                          |



Table S1. *Cont*

| Ingenuity Canonical Pathways                                                                                                                           | -log ( <i>p</i><br>value) | Activation<br>z-score | Molecules                                         |
|--------------------------------------------------------------------------------------------------------------------------------------------------------|---------------------------|-----------------------|---------------------------------------------------|
| Cellular Growth and Proliferation,<br>Organismal Development                                                                                           | 3.4056                    |                       | CAMP, LTF                                         |
| Cell Death and Survival                                                                                                                                | 3.4034                    | 2.1800                | CFH, HSPA5, HSPA8, IGF1, PRDX2                    |
| Cell-To-Cell Signaling and<br>Interaction, Hematological System                                                                                        |                           |                       |                                                   |
| Development and Function,<br>Immune Cell Trafficking,<br>Inflammatory Response                                                                         | 3.4023                    | -1.9160               | C5, CFH, F5, LTF                                  |
| Embryonic Development, Organ<br>Development, Organismal<br>Development, Renal and<br>Urological System Development<br>and Function, Tissue Development | 3.3936                    |                       | ACE, C5, CFH, IGF1, MST1, PSAP                    |
| Protein Synthesis                                                                                                                                      | 3.3915                    |                       | APOA1, CRP, FGG                                   |
| Cell Death and Survival, Nervous<br>System Development and Function                                                                                    | 3.3915                    |                       | IGF1, PSAP, SERPINF1                              |
| Organismal Injury and<br>Abnormalities, Renal and<br>Urological Disease, Renal and<br>Urological System Development<br>and Function                    | 3.3872                    |                       | ACE, CFH, COLEC11, HP, MYOCD, PSAP                |
| Cell Death and Survival                                                                                                                                | 3.3716                    | -0.1820               | CAMP, CRP, LTF, PROS1, SERPINF1                   |
| Endocrine System Disorders,<br>Gastrointestinal Disease, Metabolic<br>Disease, Organismal Injury and<br>Abnormalities                                  | 3.3686                    |                       | ACE, AMBP, BHMT, C9, COL24A1, CRP, IGF1, SERPINF1 |
| Developmental Disorder,<br>Hereditary Disorder, Organismal<br>Injury and Abnormalities, Skeletal<br>and Muscular Disorders                             | 3.3675                    |                       | ACE, HLA-A, LOXL1, PSAP                           |
| Cardiovascular System<br>Development and Function, Cell-<br>To-Cell Signaling and Interaction                                                          | 3.3645                    | 0.0000                | C5, F12, F5, HSPA5, NRP1                          |

Table S1. Cont

| Ingenuity Canonical Pathways                                                                                             | -log ( <i>p</i><br>value) | Activation<br>z-score | Molecules                                                                                                                                                                                                                                                                                                                                                     |
|--------------------------------------------------------------------------------------------------------------------------|---------------------------|-----------------------|---------------------------------------------------------------------------------------------------------------------------------------------------------------------------------------------------------------------------------------------------------------------------------------------------------------------------------------------------------------|
| Cancer, Gastrointestinal Disease,<br>Organismal Injury and<br>Abnormalities                                              | 3.3645                    | -1.0670               | ACE, ACTBL2, AHSG, ALDOB, AMBP, APOA1, BHMT, C2,<br>C5, C8G, C9, CAMP, CEP250, CFB, CFH, COL24A1,<br>COLEC11, CRP, DYNC1H1, F12, F5, FGG, HABP2, HLA-A,<br>HP, HPX, HSPA5, HSPA8, IGF1, ITIH1, ITIH2, ITIH3, ITIH4,<br>LAP3, LBP, LCP1, LOXL1, LTF, MST1, MYOCD, NRP1,<br>PGLYRP2, PI16, PKM, PM20D1, PPIA, PROS1, PROZ, PSAP,<br>PSMA7, SAA2-SAA4, SERPINA10 |
| Cancer, Organismal Injury and<br>Abnormalities                                                                           | 3.3605                    |                       | ACE, AHSG, C5, C9, CEP250, COL24A1, CRP, DYNC1H1,<br>F12, F5, FGG, HLA-A, HP, HSPA5, HSPA8, IGF1, LCP1,<br>LOXL1, MST1, MYOCD, NRP1, PGLYRP2, PI16, PKM, PPIA,<br>SERPINF1                                                                                                                                                                                    |
| Organismal Injury and<br>Abnormalities, Renal and<br>Urological Disease<br>Cellular Development,<br>Hematological System | 3.3526                    |                       | ACE, C5, CRP, F5, MYOCD, PPIA                                                                                                                                                                                                                                                                                                                                 |
| Development and Function,<br>Lymphoid Tissue Structure and<br>Development                                                | 3.3449                    | -1.0670               | APOA1, C5, CAMP, NRP1                                                                                                                                                                                                                                                                                                                                         |
| Hematological Disease, Infectious<br>Diseases, Neurological Disease,<br>Organismal Injury and<br>Abnormalities           | 3.3344                    |                       | C9, CFB                                                                                                                                                                                                                                                                                                                                                       |
| Cell Death and Survival                                                                                                  | 3.3344                    |                       | CRP, LTF                                                                                                                                                                                                                                                                                                                                                      |
| Cell-To-Cell Signaling and<br>Interaction                                                                                | 3.3344                    |                       | NRP1, PKM                                                                                                                                                                                                                                                                                                                                                     |
| Cell Death and Survival                                                                                                  | 3.3107                    |                       | C5, IGF1, PSAP, SERPINF1                                                                                                                                                                                                                                                                                                                                      |
| Lipid Metabolism, Molecular<br>Transport, Small Molecule<br>Biochemistry                                                 | 3.3019                    | -1.0720               | APOA1, APOM, BHMT, CRP, HP, IGF1, PKM, PSAP                                                                                                                                                                                                                                                                                                                   |
| Psychological Disorders                                                                                                  | 3.3010                    |                       | ACE, AMBP, CRP, IGF1, ITIH4, PSMA7                                                                                                                                                                                                                                                                                                                            |
| Protein Synthesis                                                                                                        | 3.2907                    | 0.2770                | AHSG, APOA1, APOM, BHMT, CRP, FGG, IGF1, PPIA                                                                                                                                                                                                                                                                                                                 |
| Organismal Injury and<br>Abnormalities, Respiratory Disease                                                              | 3.2882                    |                       | CRP, IGF1, LBP, LTF, PRDX2                                                                                                                                                                                                                                                                                                                                    |

Table S1. Cont

| Ingenuity Canonical Pathways                                                                                     | -log ( <i>p</i> value) | Activation z-score | Molecules                                                                                                                                                                                                                                                                                                     |
|------------------------------------------------------------------------------------------------------------------|------------------------|--------------------|---------------------------------------------------------------------------------------------------------------------------------------------------------------------------------------------------------------------------------------------------------------------------------------------------------------|
| Nervous System Development and Function, Tissue Development                                                      | 3.2676                 |                    | C5, IGF1                                                                                                                                                                                                                                                                                                      |
| Hematological Disease                                                                                            | 3.2676                 |                    | FGG, PPIA                                                                                                                                                                                                                                                                                                     |
| Cellular Movement, Hematological System Development and Function, Immune Cell Trafficking, Inflammatory Response | 3.2676                 |                    | APOA1, C5                                                                                                                                                                                                                                                                                                     |
| Organismal Injury and Abnormalities, Respiratory Disease                                                         | 3.2668                 |                    | HSPA8, IGF1, LCP1, LTF, PPIA                                                                                                                                                                                                                                                                                  |
| Cancer, Organismal Injury and Abnormalities                                                                      | 3.2636                 |                    | ACTBL2, APOA1, C2, C5, C8G, C9, CEP250, CFB, CFH, COL24A1, COLEC11, CRP, DYNC1H1, F5, HLA-A, HP, HPX, HSPA5, IGF1, ITIH3, LBP, LCP1, LOXL1, LTF, MST1, MYOCD, NRP1, PI16, PKM, PM20D1, PPIA, PSMA7, SERPINF1                                                                                                  |
| Cancer, Organismal Injury and Abnormalities                                                                      | 3.2588                 |                    | ACE, AHSG, ALDOB, AMBP, APOA1, BHMT, C2, C5, C8G, CEP250, CFB, CFH, COL24A1, COLEC11, CRP, DYNC1H1, F12, F5, FGG, HABP2, HLA-A, HPX, IGF1, ITIH1, ITIH2, ITIH3, ITIH4, LAP3, LBP, LCP1, LOXL1, LTF, MST1, MYOCD, NRP1, PGLYRP2, PI16, PKM, PM20D1, PPIA, PRDX2, PROS1, PROZ, PSAP, PSMA7, SAA2-SAA4, SERPINF1 |
| Immunological Disease                                                                                            | 3.2557                 |                    | ALDOB, C5, LTF, PPIA                                                                                                                                                                                                                                                                                          |
| Protein Degradation, Protein Synthesis                                                                           | 3.2526                 | 0.0240             | ACE, AMBP, APOA1, C5, F12, HABP2, HSPA5, HSPA8, IGF1                                                                                                                                                                                                                                                          |
| Infectious Diseases                                                                                              | 3.2464                 |                    | C5, CRP, F5                                                                                                                                                                                                                                                                                                   |
| Cell Death and Survival                                                                                          | 3.2358                 | -0.4090            | APOA1, C5, C9, HLA-A, HSPA5, IGF1, NRP1, PM20D1, PRDX2, SERPINF1                                                                                                                                                                                                                                              |
| Cancer, Gastrointestinal Disease, Hepatic System Disease, Organismal Injury and Abnormalities                    | 3.2299                 |                    | ALDOB, APOA1, BHMT, C9, F5, FGG, HP, HSPA5, HSPA8, IGF1, LAP3, MYOCD, PKM, PROZ                                                                                                                                                                                                                               |

Table S1. *Cont*

| Ingenuity Canonical Pathways                                                                                               | -log ( <i>p</i><br>value) | Activation<br>z-score | Molecules                                                                                                                                                                                                                                                               |
|----------------------------------------------------------------------------------------------------------------------------|---------------------------|-----------------------|-------------------------------------------------------------------------------------------------------------------------------------------------------------------------------------------------------------------------------------------------------------------------|
| Cancer, Organismal Injury and Abnormalities                                                                                | 3.2125                    |                       | ACE, ACTBL2, ALDOB, APOA1, C2, C5, C8G, C9, CAMP, CFB, CFH, COL24A1, COLEC11, CRP, DYNC1H1, F5, FGG, HABP2, HLA-A, HP, HPX, HSPA5, HSPA8, IGF1, ITIH1, ITIH2, ITIH3, ITIH4, LAP3, LCP1, LOXL1, LTF, MST1, MYOCD, NRP1, PKM, PM20D1, PPIA, PROS1, PSAP, PSMA7, SAA2-SAA4 |
| Cell Death and Survival                                                                                                    | 3.2104                    | 1.8660                | ACE, APOA1, C5, CAMP, CFB, CFH, CRP, DYNC1H1, HSPA5, HSPA8, IGF1, ITIH4, LTF, MST1, MYOCD, NRP1, PKM, PPIA, PRDX2, PROS1, PSAP, SERPINF1                                                                                                                                |
| Cancer, Organismal Injury and Abnormalities                                                                                | 3.2090                    | -1.0000               | ACE, AHSG, C5, C9, CEP250, COL24A1, CRP, DYNC1H1, F12, F5, FGG, HLA-A, HP, HSPA5, HSPA8, IGF1, LCP1, LOXL1, MST1, MYOCD, NRP1, PGLYRP2, PI16, PKM, PPIA, SERPINF1                                                                                                       |
| Cell Death and Survival                                                                                                    | 3.2090                    | 0.0390                | CAMP, CRP, IGF1, LTF, SERPINF1                                                                                                                                                                                                                                          |
| Cell Death and Survival                                                                                                    | 3.2076                    |                       | CRP, IGF1, LTF                                                                                                                                                                                                                                                          |
| Cancer, Gastrointestinal Disease, Inflammatory Disease, Organismal Injury and Abnormalities                                | 3.2076                    |                       | ALDOB, BHMT, C9                                                                                                                                                                                                                                                         |
| Neurological Disease, Organismal Injury and Abnormalities                                                                  | 3.2076                    |                       | HP, HPX, SERPINF1                                                                                                                                                                                                                                                       |
| Amino Acid Metabolism, Molecular Transport, Small Molecule Biochemistry                                                    | 3.2062                    |                       | C5, CFH                                                                                                                                                                                                                                                                 |
| Connective Tissue Development and Function, Skeletal and Muscular System Development and Function                          | 3.2062                    |                       | IGF1, SERPINF1                                                                                                                                                                                                                                                          |
| Cell Death and Survival, Connective Tissue Development and Function, Skeletal and Muscular System Development and Function | 3.2062                    |                       | IGF1, LTF                                                                                                                                                                                                                                                               |

Table S1. Cont

| Ingenuity Canonical Pathways                                                                                                                | -log ( <i>p</i><br>value) | Activation<br>z-score | Molecules                                                                                                                                                      |
|---------------------------------------------------------------------------------------------------------------------------------------------|---------------------------|-----------------------|----------------------------------------------------------------------------------------------------------------------------------------------------------------|
| Cancer, Organismal Injury and Abnormalities, Reproductive System Disease                                                                    | 3.1959                    |                       | ALDOB, APOA1, C2, C5, C9, CFB, CFH, COL24A1, CRP, DYNC1H1, F5, HLA-A, HSPA5, HSPA8, IGF1, ITIH2, LCP1, LTF, MST1, MYOCD, NRP1, PKM, PM20D1, PROS1, PSAP, PSMA7 |
| Cellular Movement, Hematological System Development and Function, Hypersensitivity Response, Immune Cell Trafficking, Inflammatory Response | 3.1891                    |                       | C5, CAMP, PPIA                                                                                                                                                 |
| Cardiovascular Disease, Organismal Injury and Abnormalities                                                                                 | 3.1891                    |                       | APOM, C5, CRP                                                                                                                                                  |
| Developmental Disorder, Hereditary Disorder, Metabolic Disease, Organismal Injury and Abnormalities, Respiratory Disease                    | 3.1891                    |                       | CRP, IGF1, LTF                                                                                                                                                 |
| Cellular Movement, Hematological System Development and Function, Immune Cell Trafficking, Inflammatory Response                            | 3.1811                    | -2.3690               | APOA1, C5, CAMP, CFH, MST1, SERPINF1                                                                                                                           |
| Cell-To-Cell Signaling and Interaction, Inflammatory Response                                                                               | 3.1726                    |                       | APOA1, C5, CAMP, CRP                                                                                                                                           |
| Cellular Movement                                                                                                                           | 3.1726                    | -0.1300               | IGF1, NRP1, PRDX2, SERPINF1                                                                                                                                    |
| Cardiovascular Disease, Hematological Disease, Hereditary Disorder, Metabolic Disease, Organismal Injury and Abnormalities                  | 3.1701                    |                       | APOA1, CRP, PPIA                                                                                                                                               |
| Cancer, Organismal Injury and Abnormalities, Reproductive System Disease                                                                    | 3.1681                    |                       | APOA1, C2, C9, CAMP, CEP250, COL24A1, DYNC1H1, F5, HLA-A, HP, HSPA5, IGF1, ITIH3, LBP, LTF, MST1, MYOCD, PI16, PKM, PM20D1, PPIA, PSMA7, SERPINF1              |

Table S1. Cont

| Ingenuity Canonical Pathways                                                                                                                                                                                                                                                                                                                                                    | -log ( <i>p</i><br>value) | Activation<br>z-score | Molecules                             |
|---------------------------------------------------------------------------------------------------------------------------------------------------------------------------------------------------------------------------------------------------------------------------------------------------------------------------------------------------------------------------------|---------------------------|-----------------------|---------------------------------------|
| Inflammatory Disease,<br>Inflammatory Response,<br>Neurological Disease, Organismal<br>Injury and Abnormalities<br>Cell-To-Cell Signaling and<br>Interaction, Cellular Movement,<br>Hematological System<br>Development and Function,<br>Immune Cell Trafficking,<br>Inflammatory Response<br>Dermatological Diseases and<br>Conditions, Organismal Injury and<br>Abnormalities | 3.1637                    | 0.5790                | C5, CRP, F12, HLA-A, HPX, HSPA5, IGF1 |
| Dermatological Diseases and<br>Conditions, Organismal Injury and<br>Abnormalities                                                                                                                                                                                                                                                                                               | 3.1518                    |                       | APOA1, C5, CAMP                       |
| Dermatological Diseases and<br>Conditions, Organismal Injury and<br>Abnormalities                                                                                                                                                                                                                                                                                               | 3.1494                    |                       | C5, PPIA                              |
| Dermatological Diseases and<br>Conditions, Organismal Injury and<br>Abnormalities                                                                                                                                                                                                                                                                                               | 3.1494                    |                       | C5, PPIA                              |
| Dermatological Diseases and<br>Conditions, Gastrointestinal<br>Disease, Immunological Disease,<br>Organismal Injury and<br>Abnormalities                                                                                                                                                                                                                                        | 3.1494                    |                       | C5, PPIA                              |
| Endocrine System Disorders,<br>Organismal Injury and<br>Abnormalities                                                                                                                                                                                                                                                                                                           | 3.1494                    |                       | APOA1, PRDX2                          |
| Lipid Metabolism, Small Molecule<br>Biochemistry                                                                                                                                                                                                                                                                                                                                | 3.1494                    |                       | APOA1, APOM                           |
| Cancer, Gastrointestinal Disease,<br>Hepatic System Disease,<br>Organismal Injury and<br>Abnormalities                                                                                                                                                                                                                                                                          | 3.1421                    |                       | BHMT, ITIH4, MST1, PKM                |
| Carbohydrate Metabolism, Lipid<br>Metabolism, Small Molecule<br>Biochemistry                                                                                                                                                                                                                                                                                                    | 3.1397                    | -2.2190               | APOA1, C5, HSPA5, IGF1, PRDX2         |

Table S1. *Cont*

| Ingenuity Canonical Pathways                                                                                                                  | -log ( <i>p</i><br>value) | Activation<br>z-score | Molecules                                                                                                                                                                                                      |
|-----------------------------------------------------------------------------------------------------------------------------------------------|---------------------------|-----------------------|----------------------------------------------------------------------------------------------------------------------------------------------------------------------------------------------------------------|
| Embryonic Development, Organ<br>Development, Organismal<br>Development, Respiratory System<br>Development and Function, Tissue<br>Development | 3.1343                    |                       | ACE, IGF1, MYOCD                                                                                                                                                                                               |
| Cellular Growth and Proliferation,<br>Tissue Development                                                                                      | 3.1290                    | -1.5160               | C5, CAMP, HSPA5, IGF1, ITIH4, LTF, MST1, SERPINF1                                                                                                                                                              |
| Cell Death and Survival,<br>Organismal Injury and<br>Abnormalities                                                                            | 3.1290                    | 2.0420                | ACE, CAMP, HSPA5, IGF1, ITIH4, MST1, PKM, SERPINF1                                                                                                                                                             |
| Post-Translational Modification                                                                                                               | 3.1290                    | -2.0720               | APOA1, CAMP, CRP, HSPA8, IGF1, MST1, NRP1, PPIA,<br>PSAP                                                                                                                                                       |
| Molecular Transport, Protein<br>Trafficking                                                                                                   | 3.1226                    |                       | FGG, IGF1, PPIA, PSAP                                                                                                                                                                                          |
| Hematological System<br>Development and Function,<br>Organismal Functions                                                                     | 3.1163                    |                       | ACE, C5, MYOCD                                                                                                                                                                                                 |
| Cellular Development,<br>Hematological System<br>Development and Function,<br>Lymphoid Tissue Structure and<br>Development                    | 3.1124                    | -1.4320               | APOA1, C5, CAMP, LCP1, NRP1                                                                                                                                                                                    |
| Cancer, Gastrointestinal Disease,<br>Organismal Injury and<br>Abnormalities                                                                   | 3.1002                    |                       | AHSG, C2, C8G, C9, CAMP, CEP250, CFB, CFH, COL24A1,<br>CRP, DYNC1H1, F12, F5, HLA-A, HSPA8, IGF1, ITIH2,<br>ITIH3, ITIH4, LCP1, LTF, MYOCD, PGLYRP2, PI16, PKM,<br>PM20D1, PPIA, PROS1, PROZ, PSMA7, SAA2-SAA4 |
| Organismal Injury and<br>Abnormalities                                                                                                        | 3.0953                    |                       | C5, CFB                                                                                                                                                                                                        |
| Dermatological Diseases and<br>Conditions, Hematological<br>Disease, Immunological Disease,<br>Organismal Injury and<br>Abnormalities         | 3.0953                    |                       | C5, PPIA                                                                                                                                                                                                       |
| Cellular Function and Maintenance<br>Cell Death and Survival                                                                                  | 3.0926<br>3.0830          | 1.5440                | AMBP, APOA1, COLEC11, HP, HPX<br>CAMP, CFH, HSPA5, IGF1, PKM, SERPINF1                                                                                                                                         |

Table S1. *Cont*

| Ingenuity Canonical Pathways                                                          | -log ( <i>p</i><br>value) | Activation<br>z-score | Molecules                                                                                                                                                                                                                                                                                                                                |
|---------------------------------------------------------------------------------------|---------------------------|-----------------------|------------------------------------------------------------------------------------------------------------------------------------------------------------------------------------------------------------------------------------------------------------------------------------------------------------------------------------------|
| Cell-To-Cell Signaling and<br>Interaction, Hematological System                       |                           |                       |                                                                                                                                                                                                                                                                                                                                          |
| Development and Function,<br>Immune Cell Trafficking,<br>Inflammatory Response        | 3.0820                    |                       | C5, CFH, NRP1                                                                                                                                                                                                                                                                                                                            |
| Hematological Disease, Hereditary<br>Disorder, Organismal Injury and<br>Abnormalities | 3.0820                    |                       | F12, F5, FGG                                                                                                                                                                                                                                                                                                                             |
| Cancer, Gastrointestinal Disease,<br>Organismal Injury and<br>Abnormalities           | 3.0696                    |                       | ACE, ACTBL2, AHSG, ALDOB, AMBP, APOA1, BHMT, C2,<br>C5, C8G, C9, CAMP, CEP250, CFB, CFH, COL24A1,<br>COLEC11, CRP, DYNC1H1, F12, F5, FGG, HABP2, HLA-A,<br>HPX, HSPA5, HSPA8, IGF1, ITIH1, ITIH2, ITIH3, ITIH4,<br>LAP3, LBP, LCP1, LOXL1, LTF, MST1, MYOCD, NRP1,<br>PGLYRP2, PI16, PKM, PM20D1, PPIA, PROS1, PROZ,<br>PSMA7, SAA2-SAA4 |
| Cancer, Endocrine System<br>Disorders, Organismal Injury and<br>Abnormalities         | 3.0600                    |                       | ACE, AHSG, ALDOB, AMBP, APOA1, BHMT, C2, C5, C8G,<br>CEP250, CFB, CFH, COL24A1, COLEC11, CRP, DYNC1H1,<br>F12, F5, FGG, HABP2, HLA-A, HP, HPX, HSPA5, IGF1,<br>ITIH1, ITIH2, ITIH3, ITIH4, LAP3, LBP, LCP1, LOXL1, LTF,<br>MST1, NRP1, PGLYRP2, PI16, PKM, PM20D1, PPIA, PRDX2,<br>PROS1, PROZ, PSAP, PSMA7, SAA2-SAA4, SERPINF1         |
| Cancer, Organismal Injury and<br>Abnormalities, Respiratory Disease                   | 3.0600                    | -0.7140               | ACE, AHSG, ALDOB, APOA1, C9, CAMP, CEP250, CFH,<br>COL24A1, CRP, F5, FGG, HLA-A, HSPA5, HSPA8, IGF1,<br>ITIH1, ITIH2, ITIH3, LAP3, LCP1, LTF, MYOCD, NRP1,<br>PKM, PPIA, PRDX2, PROS1, PSAP, SAA2-SAA4                                                                                                                                   |
| Cell-To-Cell Signaling and<br>Interaction, Cellular Growth and<br>Proliferation       | 3.0482                    |                       | C5, CAMP, IGF1                                                                                                                                                                                                                                                                                                                           |
| Post-Translational Modification,<br>Protein Degradation, Protein<br>Synthesis         | 3.0467                    |                       | ACE, C5, F12, HABP2, HSPA8                                                                                                                                                                                                                                                                                                               |
| Cardiovascular System<br>Development and Function,<br>Organismal Development          | 3.0467                    | -0.7040               | HABP2, IGF1, NRP1, PPIA, SERPINF1                                                                                                                                                                                                                                                                                                        |



Table S1. *Cont*

| Ingenuity Canonical Pathways                                                                                                                                                                                               | -log ( <i>p</i><br>value) | Activation<br>z-score | Molecules                  |
|----------------------------------------------------------------------------------------------------------------------------------------------------------------------------------------------------------------------------|---------------------------|-----------------------|----------------------------|
| Cell Morphology, Embryonic<br>Development, Nervous System<br>Development and Function, Organ<br>Development, Organ Morphology,<br>Organismal Development, Tissue<br>Development, Visual System<br>Development and Function | 3.0458                    |                       | CFH, IGF1, LOXL1, SERPINF1 |
| Cellular Movement                                                                                                                                                                                                          | 3.0448                    |                       | IGF1, PPIA                 |
| Hereditary Disorder, Organismal<br>Injury and Abnormalities                                                                                                                                                                | 3.0448                    |                       | ACE, F12                   |
| Immunological Disease,<br>Inflammatory Disease,<br>Inflammatory Response,                                                                                                                                                  | 3.0448                    |                       | CRP, IGF1                  |
| Neurological Disease, Organismal<br>Injury and Abnormalities                                                                                                                                                               |                           |                       |                            |
| Carbohydrate Metabolism, Lipid<br>Metabolism, Small Molecule<br>Biochemistry                                                                                                                                               | 3.0448                    |                       | IGF1, LBP                  |
| Cardiovascular Disease,<br>Organismal Injury and<br>Abnormalities                                                                                                                                                          | 3.0448                    |                       | ACE, MYOCD                 |
| Cardiovascular System<br>Development and Function,<br>Cellular Development, Cellular<br>Growth and Proliferation,                                                                                                          |                           |                       |                            |
| Embryonic Development, Organ<br>Development, Organismal<br>Development, Skeletal and<br>Muscular System Development<br>and Function, Tissue Development                                                                    | 3.0448                    |                       | HSPA5, IGF1                |
| Cell-To-Cell Signaling and<br>Interaction, Cellular Movement,<br>Immune Cell Trafficking                                                                                                                                   | 3.0448                    |                       | C5, CAMP                   |
| Auditory Disease, Neurological<br>Disease                                                                                                                                                                                  | 3.0315                    |                       | CEP250, IGF1, PSAP         |

Table S1. *Cont*

| Ingenuity Canonical Pathways                                                                                                     | -log ( <i>p</i><br>value) | Activation<br>z-score | Molecules                                                                                                                                                                                                                                                                                                                                          |
|----------------------------------------------------------------------------------------------------------------------------------|---------------------------|-----------------------|----------------------------------------------------------------------------------------------------------------------------------------------------------------------------------------------------------------------------------------------------------------------------------------------------------------------------------------------------|
| Psychological Disorders                                                                                                          | 3.0278                    |                       | ACE, AMBP, CRP, IGF1, ITIH1, ITIH4, PSMA7                                                                                                                                                                                                                                                                                                          |
| Cell-To-Cell Signaling and<br>Interaction, Cellular Movement,<br>Hematological System                                            | 3.0273                    | -1.1540               | APOA1, C5, CAMP, PGLYRP2                                                                                                                                                                                                                                                                                                                           |
| Development and Function,<br>Immune Cell Trafficking<br>Lipid Metabolism, Molecular<br>Transport, Small Molecule<br>Biochemistry | 3.0237                    | -0.7880               | APOA1, APOM, BHMT, CRP, HP, PKM                                                                                                                                                                                                                                                                                                                    |
| Cancer, Gastrointestinal Disease,<br>Organismal Injury and<br>Abnormalities                                                      | 3.0195                    |                       | ALDOB, BHMT, C9, CEP250, COLEC11, F5, LBP                                                                                                                                                                                                                                                                                                          |
| Cancer, Organismal Injury and<br>Abnormalities                                                                                   | 3.0177                    |                       | ACE, ACTBL2, AHSG, ALDOB, AMBP, BHMT, C2, C5, C8G,<br>CEP250, CFB, CFH, COL24A1, COLEC11, CRP, DYNC1H1,<br>F12, F5, FGG, HABP2, HLA-A, HPX, HSPA8, IGF1, ITIH1,<br>ITIH2, ITIH3, ITIH4, LAP3, LBP, LCP1, LOXL1, LTF, MST1,<br>MYOCD, NRP1, PGLYRP2, PI16, PKM, PM20D1, PPIA,<br>PRDX2, PROS1, PROZ, PSAP, PSMA7, SAA2-SAA4,<br>SERPINA10, SERPINF1 |
| Organismal Injury and<br>Abnormalities, Renal and<br>Urological Disease                                                          | 3.0155                    |                       | ACE, IGF1, PSAP                                                                                                                                                                                                                                                                                                                                    |
| Connective Tissue Disorders,<br>Organismal Injury and<br>Abnormalities                                                           | 3.0092                    |                       | ACE, APOA1, HSPA5, IGF1                                                                                                                                                                                                                                                                                                                            |
| Cardiovascular Disease,<br>Hematological Disease,<br>Organismal Injury and<br>Abnormalities                                      | 15.4763                   | 0.5450                | C2, C5, CFB, CFH, CRP, F12, F5, FGG, HABP2, MYOCD,<br>PPIA, PRDX2, PROS1, PROZ, SERPINA10                                                                                                                                                                                                                                                          |
| Inflammatory Disease                                                                                                             | 13.3585                   |                       | ACE, AHSG, APOA1, APOM, BHMT, C2, C5, CAMP, CFB,<br>CFH, CRP, F5, HLA-A, HP, HSPA5, HSPA8, IGF1, LAP3,<br>LBP, LCP1, LTF, NRP1, PKM, PPIA, PRDX2, Serpina3g<br>(includes others)                                                                                                                                                                   |
