# Supplementary material for: Plasma Proteomic Changes of Atherosclerosis after Exercise in ApoE Knockout Mice
Source: Biology (Basel). 2022 Feb 6;11(2):253. doi: 10.3390/biology11020253 (PMC8869651; doi:10.3390/biology11020253)
Supplement: Supplementary file 1 [file biology-11-00253-s001.zip › biology-1545669-IPA analysis.xls]

## Sheet: Sheet0
	© 2000-2022 QIAGEN. All rights reserved.
	Categories	p-value	Activation z-score	Molecules
1	Cardiovascular Disease,Hematological Disease,Organismal Injury and Abnormalities	15.4763	0.545	C2,C5,CFB,CFH,CRP,F12,F5,FGG,HABP2,MYOCD,PPIA,PRDX2,PROS1,PROZ,SERPINA10
2	Inflammatory Disease	13.3585		ACE,AHSG,APOA1,APOM,BHMT,C2,C5,CAMP,CFB,CFH,CRP,F5,HLA-A,HP,HSPA5,HSPA8,IGF1,LAP3,LBP,LCP1,LTF,NRP1,PKM,PPIA,PRDX2,Serpina3g (includes others)
3	Infectious Diseases	13.3363		AHSG,APOA1,APOM,C5,CFB,CRP,F5,HSPA5,ITIH3,ITIH4,PKM,PPIA
4	Inflammatory Response	12.71	-2.109	ACE,AHSG,APOA1,C5,CAMP,CFH,CRP,F12,FGG,HLA-A,HP,IGF1,LBP,LCP1,LTF,MST1,Orm1 (includes others),PGLYRP2,PPIA,PROS1,Retnlg,SERPINF1
5	Cell-To-Cell Signaling and Interaction,Hematological System Development and Function,Immune Cell Trafficking,Inflammatory Response	12.5214	-2.274	ACE,APOA1,C5,CAMP,CFH,CRP,F5,FGG,HLA-A,IGF1,LBP,LTF,Orm1 (includes others),PPIA,PROS1,SERPINF1
6	Inflammatory Response	12.2161	1.248	ACE,AMBP,APOA1,APOM,C5,CAMP,CFB,CFH,CRP,F12,F5,HLA-A,HP,HPX,HSPA5,IGF1,LBP,LTF,MST1,PGLYRP2,PKM,PPIA,PRDX2,PROS1,Retnlg,Serpina3g (includes others)
7	Connective Tissue Disorders,Inflammatory Disease,Inflammatory Response,Organismal Injury and Abnormalities,Skeletal and Muscular Disorders	12.1512	-1.243	AHSG,APOA1,APOM,BHMT,C2,C5,CFB,CRP,FGG,HLA-A,HP,HSPA5,HSPA8,IGF1,LAP3,LBP,LCP1,LTF,NRP1,PGLYRP2,PKM,PPIA,PRDX2
8	Inflammatory Response	12.0752	1.549	ACE,AMBP,APOA1,C5,CAMP,CFB,CFH,CRP,F5,HLA-A,HP,HPX,HSPA5,IGF1,LBP,LTF,MST1,PGLYRP2,PKM,PPIA,PRDX2,PROS1,Retnlg,Serpina3g (includes others)
9	Metabolic Disease,Organismal Injury and Abnormalities	12.064		ACE,AHSG,ALDOB,AMBP,APOA1,APOM,BHMT,C2,C5,C8G,C9,CFB,CFH,COL24A1,CRP,HABP2,HLA-A,HP,HSPA5,IGF1,ITIH4,LBP,LCP1,LTF,PKM,PM20D1,PPIA,PRDX2,SERPINF1
10	Cell-To-Cell Signaling and Interaction,Hematological System Development and Function	11.9318	-2.383	ACE,C5,CAMP,CFH,CRP,F5,FGG,HLA-A,IGF1,LBP,LTF,Orm1 (includes others),PPIA,PROS1,SERPINF1
11	Connective Tissue Disorders,Inflammatory Disease,Organismal Injury and Abnormalities,Skeletal and Muscular Disorders	11.2464	-0.917	AHSG,APOA1,APOM,BHMT,C2,C5,CAMP,CFB,CFH,CRP,FGG,HLA-A,HP,HSPA5,HSPA8,IGF1,LAP3,LBP,LCP1,LTF,NRP1,PGLYRP2,PKM,PPIA,PRDX2
12	Endocrine System Disorders,Gastrointestinal Disease,Metabolic Disease,Organismal Injury and Abnormalities	11.1765		ACE,AHSG,ALDOB,AMBP,APOA1,APOM,BHMT,C2,C5,C8G,C9,CFB,CFH,COL24A1,CRP,HABP2,HLA-A,HP,HSPA5,IGF1,ITIH4,LCP1,PKM,PM20D1,PPIA,SERPINF1
13	Cellular Compromise,Inflammatory Response	11.0405		AHSG,APOA1,C5,CAMP,DYNC1H1,F5,FGG,HP,HSPA8,IGF1,ITIH3,ITIH4,LTF,PKM,PPIA,PROS1,PSAP
14	Connective Tissue Disorders,Immunological Disease,Inflammatory Disease,Inflammatory Response,Organismal Injury and Abnormalities,Skeletal and Muscular Disorders	10.9431		AHSG,APOA1,APOM,BHMT,C2,C5,CFB,CRP,HLA-A,HP,HSPA8,IGF1,LAP3,LBP,LCP1,LTF,NRP1,PPIA,PRDX2
15	Cell-To-Cell Signaling and Interaction,Hematological System Development and Function,Immune Cell Trafficking,Inflammatory Response	10.9172	-2.227	ACE,APOA1,C5,CAMP,CFH,CRP,F5,FGG,HLA-A,HPX,IGF1,LBP,LTF,Orm1 (includes others),PGLYRP2,PPIA,PROS1,PSAP,SERPINF1
16	Immunological Disease,Inflammatory Disease	10.7496		ACE,AHSG,APOA1,APOM,BHMT,C2,C5,CAMP,CFB,CFH,CRP,HLA-A,HP,HPX,HSPA5,HSPA8,IGF1,LAP3,LBP,LCP1,LTF,NRP1,PPIA,PRDX2,PSAP
17	Inflammatory Response,Organismal Injury and Abnormalities	10.5986	2.125	ACE,AMBP,APOA1,C5,CAMP,CFB,CFH,CRP,F12,F5,HLA-A,HP,HPX,HSPA5,IGF1,LBP,LTF,MST1,PGLYRP2,PKM,PPIA,PRDX2,PROS1,PSAP,Retnlg,Serpina3g (includes others)
18	Infectious Diseases	10.556		ACE,AHSG,APOA1,APOM,C5,CFB,CRP,DYNC1H1,F5,HSPA5,HSPA8,ITIH3,ITIH4,PKM,PPIA
19	Cellular Compromise,Inflammatory Response	10.4855		AHSG,APOA1,F5,FGG,IGF1,ITIH3,ITIH4,PROS1,PSAP
20	Infectious Diseases	10.1772	-1.786	ACE,AHSG,APOA1,APOM,C2,C5,CAMP,CFB,CRP,DYNC1H1,F12,F5,HLA-A,HP,HSPA5,HSPA8,IGF1,ITIH3,ITIH4,LTF,NRP1,PKM,PM20D1,PPIA,PRDX2,PROS1,PSMA7,SERPINA10
21	Cellular Movement,Immune Cell Trafficking	10.0915	-1.056	APOA1,C2,C5,CAMP,CFB,CFH,CRP,HLA-A,HP,HSPA5,LBP,LCP1,LTF,MST1,Orm1 (includes others),PGLYRP2,PI16,PPIA,PROS1,Retnlg,SERPINF1
22	Immunological Disease	10.0625		ACE,AHSG,APOA1,APOM,BHMT,C2,C5,CAMP,CFB,CFH,CRP,F5,HLA-A,HP,HSPA8,IGF1,ITIH4,LAP3,LBP,LCP1,LTF,NRP1,PPIA,PRDX2
23	Organismal Injury and Abnormalities,Renal and Urological Disease	10.0448	-0.813	ACE,AHSG,AMBP,C5,CFB,CFH,COLEC11,HPX,IGF1,MST1,PKM
24	Infectious Diseases	10.0232		ACE,AHSG,APOA1,APOM,C5,CFB,CRP,F5,HSPA5,HSPA8,ITIH3,ITIH4,PKM,PPIA
25	Cardiovascular Disease,Organismal Injury and Abnormalities	10.0186	-0.484	ACE,AHSG,APOA1,APOM,C5,CRP,F12,F5,FGG,HABP2,HP,IGF1,PKM,PPIA,PRDX2,PROS1
26	Cell-To-Cell Signaling and Interaction	9.94692	-1.221	APOA1,C5,CAMP,CFH,CRP,FGG,LBP,LCP1,LTF,PKM,PRDX2
27	Free Radical Scavenging	9.93181	0.773	ACE,APOA1,C5,CAMP,CFH,CRP,HP,IGF1,LTF,PPIA,SERPINF1
28	Cell-To-Cell Signaling and Interaction,Hematological System Development and Function,Immune Cell Trafficking,Inflammatory Response	9.89963	-1.243	ACE,APOA1,CAMP,CRP,FGG,HLA-A,IGF1,LBP,LTF,Orm1 (includes others),PROS1,PSAP,SERPINF1
	Cell-To-Cell Signaling and Interaction	9.76447	-2.418	ACE,APOA1,C5,CAMP,CFH,CRP,F5,FGG,HLA-A,HPX,IGF1,LBP,LTF,MST1,Orm1 (includes others),PGLYRP2,PKM,PPIA,PROS1,PSAP,SERPINF1
	Cellular Movement	9.67366	-1.781	AHSG,APOA1,C2,C5,CAMP,CFB,CFH,CRP,F12,HABP2,HLA-A,HP,HSPA5,HSPA8,IGF1,LBP,LCP1,LTF,MST1,MYOCD,NRP1,Orm1 (includes others),PGLYRP2,PI16,PKM,PPIA,PRDX2,PROS1,Retnlg,SERPINF1
	Cellular Movement,Hematological System Development and Function,Immune Cell Trafficking	9.59007	-1.274	APOA1,C2,C5,CAMP,CFB,CFH,CRP,HLA-A,HP,HSPA5,LBP,LCP1,LTF,MST1,PGLYRP2,PI16,PPIA,Retnlg,SERPINF1
	Cell-To-Cell Signaling and Interaction	9.57675	-1.218	APOA1,C5,CAMP,CFH,CRP,F12,F5,FGG,LBP,LCP1,LTF,NRP1,PKM,PRDX2
	Organismal Injury and Abnormalities,Respiratory Disease	9.09044	-1.58	ACE,AHSG,AMBP,C2,C5,CFB,CRP,F12,HABP2,HSPA5,IGF1
	Cardiovascular Disease	9.06601	-0.397	ACE,AHSG,APOA1,APOM,C5,CRP,F12,F5,FGG,HABP2,HP,IGF1,PKM,PPIA,PRDX2
	Cell-To-Cell Signaling and Interaction,Hematological System Development and Function,Immune Cell Trafficking,Inflammatory Response	9.0381	-1.105	ACE,CAMP,CRP,FGG,HLA-A,IGF1,LBP,LTF,Orm1 (includes others),PROS1,SERPINF1
	Infectious Diseases	9.01818	-1.97	ACE,AHSG,APOA1,APOM,C2,C5,CFB,CRP,DYNC1H1,F5,HLA-A,HSPA5,HSPA8,IGF1,ITIH3,ITIH4,LTF,PKM,PM20D1,PPIA,PSMA7
	Cardiovascular Disease,Hematological Disease,Hereditary Disorder,Organismal Injury and Abnormalities	8.92445		F5,FGG,HABP2,PROS1
	Cell-To-Cell Signaling and Interaction,Hematological System Development and Function,Inflammatory Response	8.92082	-1.444	APOA1,C5,CAMP,CFH,CRP,FGG,LBP,LCP1,PKM,PRDX2
	Cell Death and Survival	8.73755	-0.785	C5,C8G,C9,CAMP,CFB,CFH,HLA-A,HSPA5,LBP,PPIA,PRDX2
	Gastrointestinal Disease,Hepatic System Disease,Organismal Injury and Abnormalities	8.62525	1.383	ACE,AHSG,ALDOB,AMBP,APOA1,BHMT,C5,C9,CEP250,CFB,CFH,COL24A1,CRP,DYNC1H1,F12,F5,FGG,HABP2,HLA-A,HP,HPX,HSPA5,HSPA8,IGF1,ITIH1,ITIH2,ITIH4,LAP3,LBP,LCP1,LOXL1,MST1,MYOCD,PGLYRP2,PI16,PKM,PM20D1,PPIA,PRDX2,PROS1,PROZ,PSAP,SAA2-SAA4,SERPINA10
	Organismal Injury and Abnormalities,Tissue Morphology	8.61979		ACE,APOA1,CAMP,CRP,F12,F5,FGG,HABP2,HLA-A,IGF1,NRP1,PPIA,PRDX2
	Organismal Injury and Abnormalities,Renal and Urological Disease	8.4698	-1.118	AHSG,AMBP,C5,CFB,CFH,COLEC11,IGF1,MST1,PKM
	Neurological Disease,Organismal Injury and Abnormalities	8.46092		ACE,APOA1,C5,C9,CFB,CRP,DYNC1H1,F12,F5,HP,HPX,HSPA5,IGF1,LTF,MYOCD,PPIA,PRDX2,PROS1,PSAP
	Cell-To-Cell Signaling and Interaction,Hematological System Development and Function,Immune Cell Trafficking	8.44009	-1.46	APOA1,C5,CAMP,CFH,CRP,FGG,LBP,LCP1,LTF,NRP1,PKM,PRDX2
	Organismal Injury and Abnormalities,Respiratory Disease	8.2815	-1.339	ACE,AHSG,AMBP,C2,C5,CFB,F12,HABP2,HSPA5,IGF1
	Cellular Movement	8.24109	-1.117	APOA1,C2,C5,CAMP,CFB,CFH,CRP,HP,HSPA5,LBP,LCP1,LTF,MST1,PPIA,SERPINF1
	Cell Death and Survival,Connective Tissue Disorders,Hematological Disease,Organismal Injury and Abnormalities	8.19314	-0.339	C5,C8G,CAMP,CFB,CFH,HSPA5,PPIA,PRDX2
	Cardiovascular Disease,Organismal Injury and Abnormalities	8.1831	-0.397	ACE,AHSG,APOA1,APOM,C5,CRP,F12,F5,FGG,HP,IGF1,PKM,PPIA,PRDX2
	Cancer,Gastrointestinal Disease,Organismal Injury and Abnormalities	8.17653		ACE,ACTBL2,AHSG,ALDOB,AMBP,APOA1,BHMT,C5,C8G,C9,CEP250,CFB,COL24A1,COLEC11,CRP,DYNC1H1,F12,F5,FGG,HABP2,HLA-A,HP,HPX,HSPA5,HSPA8,IGF1,ITIH1,ITIH2,ITIH4,LAP3,LBP,LOXL1,LTF,MST1,MYOCD,NRP1,PGLYRP2,PI16,PKM,PM20D1,PPIA,PROZ,PSAP,SAA2-SAA4,SERPINA10
	Carbohydrate Metabolism	8.15304	-2.306	APOA1,CAMP,CFH,IGF1,ITIH2,LBP,PSAP
	Free Radical Scavenging	8.14146	-1.123	ACE,APOA1,C5,CAMP,CFB,CFH,CRP,HP,IGF1,ITIH4,LTF,PPIA,PRDX2,SERPINF1
	Cell-To-Cell Signaling and Interaction,Hematological System Development and Function	8.10182	-0.883	C5,CFH,CRP,F12,FGG,IGF1,NRP1,PPIA,PRDX2,SERPINF1
	Cardiovascular Disease,Organismal Injury and Abnormalities	8.03105	-0.086	ACE,AHSG,APOA1,APOM,C5,CRP,F5,FGG,HP,IGF1,PKM,PPIA,PRDX2
	Cardiovascular Disease,Organismal Injury and Abnormalities	7.88606	-0.21	ACE,APOA1,C5,CRP,F12,F5,FGG,HLA-A,IGF1,NRP1,PPIA,PROS1
	Cardiovascular System Development and Function,Cellular Development,Cellular Function and Maintenance,Cellular Growth and Proliferation,Organismal Development,Tissue Development	7.83565	-0.044	CAMP,F12,HABP2,HSPA5,IGF1,NRP1,PKM,PPIA,PROS1
	Cardiovascular System Development and Function,Cellular Development,Cellular Function and Maintenance,Cellular Growth and Proliferation,Organismal Development,Tissue Development	7.73283	0.329	APOA1,CAMP,F12,HABP2,HSPA5,IGF1,NRP1,PKM,PPIA,PROS1,SERPINF1
	Cell-To-Cell Signaling and Interaction	7.7122	-1.534	C5,CFH,CRP,F12,FGG,IGF1,LTF,NRP1,PPIA,PRDX2,SERPINF1
	Cardiovascular Disease,Hereditary Disorder,Organismal Injury and Abnormalities	7.54975		ACE,APOA1,CFB,CFH,CRP,F12,F5,FGG,HABP2,IGF1,NRP1,PPIA,PROS1
	Hematological System Development and Function	7.47886	-0.975	C9,CRP,F12,F5,FGG,HP,PPIA,PROS1,PROZ,SERPINF1
	Carbohydrate Metabolism	7.46597	-2.169	APOA1,CAMP,CFH,IGF1,ITIH2,LBP
	Cardiovascular Disease,Hereditary Disorder,Organismal Injury and Abnormalities	7.451		ACE,CFB,CFH,F5,FGG,HABP2,IGF1,NRP1,PROS1
	Metabolic Disease,Neurological Disease,Organismal Injury and Abnormalities,Psychological Disorders	7.44733		ACE,APOA1,C5,C9,CFB,CRP,F12,HP,HPX,HSPA5,IGF1,MYOCD,PROS1,PSAP
	Endocrine System Disorders,Organismal Injury and Abnormalities	7.37059		AHSG,APOA1,HSPA5,HSPA8,PRDX2
	Cellular Function and Maintenance	7.34775	-2.072	ACE,AMBP,APOA1,C5,CAMP,CFH,COLEC11,CRP,HP,HPX,HSPA5,HSPA8,PKM,PROS1
	Cancer,Gastrointestinal Disease,Organismal Injury and Abnormalities	7.30016	0.438	ACE,AHSG,ALDOB,AMBP,APOA1,BHMT,C5,C9,CEP250,CFB,COL24A1,CRP,DYNC1H1,F12,F5,FGG,HABP2,HLA-A,HP,HPX,HSPA5,HSPA8,IGF1,ITIH1,ITIH2,ITIH4,LAP3,LBP,LCP1,LOXL1,MST1,MYOCD,PGLYRP2,PI16,PKM,PM20D1,PPIA,PRDX2,PROZ,PSAP,SAA2-SAA4,SERPINA10
	Cancer,Gastrointestinal Disease,Hepatic System Disease,Organismal Injury and Abnormalities	7.29158		ACE,AHSG,ALDOB,AMBP,APOA1,BHMT,C5,C9,CEP250,CFB,COL24A1,CRP,DYNC1H1,F12,F5,FGG,HABP2,HP,HPX,HSPA5,HSPA8,IGF1,ITIH1,ITIH2,ITIH4,LAP3,LBP,LOXL1,MST1,MYOCD,PGLYRP2,PI16,PKM,PM20D1,PROZ,PSAP,SAA2-SAA4,SERPINA10
	Cancer,Gastrointestinal Disease,Hepatic System Disease,Organismal Injury and Abnormalities	7.25259	0.438	ACE,AHSG,ALDOB,AMBP,APOA1,BHMT,C5,C9,CEP250,CFB,COL24A1,CRP,DYNC1H1,F12,F5,FGG,HABP2,HP,HPX,HSPA5,HSPA8,IGF1,ITIH1,ITIH2,ITIH4,LAP3,LBP,LCP1,LOXL1,MST1,MYOCD,PGLYRP2,PI16,PKM,PM20D1,PPIA,PRDX2,PROZ,PSAP,SAA2-SAA4,SERPINA10
	Tissue Development	7.18442	-0.793	APOA1,C5,CAMP,F12,HABP2,HSPA5,IGF1,ITIH4,LTF,MST1,NRP1,PKM,PPIA,PROS1,SERPINF1
	Cancer,Gastrointestinal Disease,Hepatic System Disease,Organismal Injury and Abnormalities	7.1707		ACE,AHSG,ALDOB,AMBP,APOA1,BHMT,C5,C9,CEP250,CFB,COL24A1,CRP,DYNC1H1,F12,F5,FGG,HABP2,HLA-A,HP,HPX,HSPA5,HSPA8,IGF1,ITIH1,ITIH2,ITIH4,LAP3,LBP,LOXL1,MST1,MYOCD,PGLYRP2,PI16,PKM,PM20D1,PROZ,PSAP,SAA2-SAA4,SERPINA10
	Protein Synthesis	7.08249		AHSG,APOA1,F5,FGG,IGF1,ITIH2,LTF,SERPINA10
	Tissue Development	7.07883	0.128	APOA1,CAMP,CFH,F12,HABP2,HSPA5,IGF1,MST1,NRP1,PKM,PPIA,PROS1,SERPINF1
	Gastrointestinal Disease,Inflammatory Disease,Inflammatory Response,Organismal Injury and Abnormalities	7.01954	0.277	CAMP,CFB,CRP,HP,LBP,LTF,MST1,PGLYRP2,PKM,PROS1,Retnlg,Serpina3g (includes others)
	Lipid Metabolism,Molecular Transport,Small Molecule Biochemistry	6.78252	-1.561	ACE,AHSG,APOA1,APOM,BHMT,C5,CAMP,CFB,CRP,HP,HSPA5,IGF1,LBP,PKM,PSAP,SAA2-SAA4
	Developmental Disorder,Hereditary Disorder,Immunological Disease,Organismal Injury and Abnormalities	6.70333		C2,C5,C9,CFB
	Molecular Transport	6.64397		APOA1,C5,CFB,COLEC11,IGF1
	Cardiovascular Disease,Hematological Disease,Organismal Injury and Abnormalities	6.64397		F12,F5,FGG,HABP2,PROS1
	Cardiovascular System Development and Function	6.60033	-1.125	ACE,APOA1,C5,CAMP,CFB,CFH,F12,HABP2,HP,HSPA5,IGF1,MYOCD,NRP1,PKM,PPIA,PROS1,PSAP,SERPINF1
	Cardiovascular System Development and Function,Organismal Development	6.55129	-1.141	APOA1,C5,CAMP,CFB,CFH,F12,HABP2,HP,HSPA5,IGF1,MYOCD,NRP1,PKM,PPIA,PROS1,PSAP,SERPINF1
	Cardiovascular Disease,Cellular Compromise,Organismal Injury and Abnormalities	6.53611	2	CRP,HP,HPX,SERPINF1
	Cell-To-Cell Signaling and Interaction,Hematological System Development and Function,Inflammatory Response	6.50169	-0.262	CFH,CRP,F12,FGG,IGF1,PPIA,PRDX2,SERPINF1
	Hematological System Development and Function,Organismal Functions	6.48545	-0.647	C9,CRP,F12,F5,FGG,PPIA,PROS1,PROZ,SERPINF1
	Cellular Compromise,Inflammatory Response	6.48017		AHSG,C5,CAMP,DYNC1H1,HP,HSPA8,LTF,PKM,PPIA,PSAP
	Cellular Function and Maintenance	6.4318	-2.234	ACE,AHSG,APOA1,C5,CAMP,CFH,CRP,HP,HSPA5,HSPA8,PKM,PROS1
	Cellular Movement	6.4023	0.569	APOA1,C2,C5,CFB,CFH,HLA-A,HSPA5,LBP,LTF,NRP1,PI16,PPIA
	Organismal Survival	6.37263	0.121	APOA1,C5,CAMP,CFB,CFH,CRP,F12,HLA-A,HP,IGF1,LBP,LTF,NRP1,PKM,SERPINA10
	Cellular Movement,Hematological System Development and Function,Immune Cell Trafficking,Inflammatory Response	6.34679	-1.298	APOA1,C2,C5,CAMP,CFB,CFH,CRP,HP,HSPA5,LBP,MST1,PPIA,SERPINF1
	Metabolic Disease,Organismal Injury and Abnormalities	6.34199	2	ACE,APOA1,CRP,HSPA5,LBP,LCP1,PPIA,PSAP,SERPINF1
	Cell Death and Survival,Organismal Injury and Abnormalities,Renal and Urological Disease	6.33913	0.692	C5,CFB,IGF1,MST1,PKM
	Dermatological Diseases and Conditions,Organismal Injury and Abnormalities	6.32057		C5,CAMP,CRP,HLA-A,NRP1,PPIA,PSAP
	Cardiovascular Disease,Hematological Disease,Hereditary Disorder,Organismal Injury and Abnormalities	6.29843		F5,HABP2,PROS1
	Cell Death and Survival	6.29843		ACE,CAMP,LTF
	Carbohydrate Metabolism,Lipid Metabolism,Molecular Transport,Small Molecule Biochemistry	6.29843		CAMP,CFB,LBP
	Endocrine System Disorders,Gastrointestinal Disease,Inflammatory Disease,Inflammatory Response,Organismal Injury and Abnormalities	6.29073		APOA1,F5,HSPA5,IGF1,PKM,PPIA,PRDX2
	Cellular Movement,Hematological System Development and Function,Immune Cell Trafficking,Inflammatory Response	6.27901	-1.46	APOA1,C5,CAMP,HP,MST1,PPIA
	Organismal Injury and Abnormalities	6.2668	1.52	ACE,C5,CRP,F12,F5,FGG,NRP1,PGLYRP2,PPIA,PROS1,PROZ
	Cell Death and Survival	6.2652	-0.882	ACE,C9,CAMP,CFH,HLA-A,HSPA5,LTF,SERPINF1
	Cardiovascular System Development and Function,Organismal Development	6.23359	-0.955	APOA1,C5,CAMP,CFB,F12,HABP2,HSPA5,IGF1,MYOCD,NRP1,PKM,PPIA,PROS1,PSAP,SERPINF1
	Hematological Disease	6.16877	-1.067	C5,CFB,F12,F5,FGG,HSPA5,LTF,PPIA,PROS1
	Humoral Immune Response,Inflammatory Response	6.15428		C2,CFB,CFH,COLEC11,CRP,F12
	Cellular Movement	6.11238	-1.581	APOA1,C5,CAMP,HP,IGF1,LBP,LCP1,MST1,NRP1,PPIA,Retnlg,SERPINF1
	Cell-To-Cell Signaling and Interaction,Hematological System Development and Function,Inflammatory Response	6.04287	-1	CRP,FGG,LBP,LCP1,PRDX2
	Metabolic Disease,Organismal Injury and Abnormalities	6.02549	2	ACE,APOA1,CRP,HSPA5,LBP,LCP1,PPIA,PROS1,PSAP,SERPINF1
	Cell Death and Survival	6.02503	2.222	ACE,APOA1,C5,C9,CAMP,CFB,CFH,CRP,DYNC1H1,F5,HLA-A,HSPA5,HSPA8,IGF1,ITIH4,LBP,LTF,MST1,MYOCD,NRP1,PKM,PM20D1,PPIA,PRDX2,PROS1,PSAP,PSMA7,SERPINF1
	Inflammatory Response,Respiratory Disease	6.00966		ACE,AMBP,APOA1,C5,CAMP,CRP,HLA-A,HSPA5,IGF1,LBP,LTF,PPIA
	Cellular Movement,Hematological System Development and Function,Immune Cell Trafficking	6.00833	0.098	APOA1,C2,C5,CFB,CFH,HLA-A,HSPA5,LBP,LTF,PI16,PPIA
	Cell-To-Cell Signaling and Interaction	6.00436	-1.387	APOA1,C5,CFH,CRP,LCP1,LTF,PRDX2
	Cancer,Gastrointestinal Disease,Hepatic System Disease,Organismal Injury and Abnormalities	5.9914		ALDOB,BHMT,HSPA5,HSPA8
	Cardiovascular System Development and Function	5.9914	0.014	C5,CAMP,CFB,IGF1,LTF,NRP1,SERPINF1
	Hereditary Disorder,Organismal Injury and Abnormalities,Psychological Disorders	5.9914		ACE,C5,C9,CRP,DYNC1H1,FGG,HP,HSPA5,HSPA8,IGF1,ITIH3,ITIH4,PKM,PPIA,PRDX2,PSAP
	Cardiovascular System Development and Function,Cellular Movement	5.91364	-0.298	APOA1,C5,CAMP,CRP,HSPA5,IGF1,NRP1,PKM,PROS1,SERPINF1
	Cellular Function and Maintenance	5.91364	-1.899	ACE,APOA1,C5,CAMP,CFH,CRP,HP,HSPA5,PKM,PROS1
	Infectious Diseases	5.87943		C5,F12,F5,PROS1
	Cardiovascular Disease,Hematological Disease,Organismal Injury and Abnormalities,Renal and Urological Disease	5.87943		C2,C5,CFB,CFH
	Cellular Movement,Hematological System Development and Function,Immune Cell Trafficking,Inflammatory Response	5.79588	-1.698	APOA1,C5,CAMP,HP,MST1,PPIA,SERPINF1
	Hematological Disease	5.77211		F12,F5,FGG,PPIA
	Hematological Disease,Metabolic Disease,Organismal Injury and Abnormalities	5.76955		ACE,APOA1,CRP,LBP,LCP1,PPIA,SERPINF1
	Dermatological Diseases and Conditions,Organismal Injury and Abnormalities	5.76447		C5,CAMP,CRP,HSPA8,NRP1,PKM,PPIA,PSAP
	Cellular Movement,Hematological System Development and Function,Immune Cell Trafficking	5.73993	0.025	APOA1,C2,C5,CAMP,CFB,CFH,CRP,LBP,LTF,PPIA
	Cardiovascular Disease,Cell Death and Survival,Connective Tissue Disorders,Hematological Disease,Organismal Injury and Abnormalities	5.7122		C5,CFB,CFH,HSPA5,PPIA,PRDX2
	Respiratory Disease	5.6925		ACE,AHSG,C5,CAMP,F12,HABP2,HP,HSPA5,LTF
	Cardiovascular Disease,Hematological Disease,Organismal Injury and Abnormalities	5.67366		C5,CFB,CFH,PPIA
	Carbohydrate Metabolism,Lipid Metabolism,Small Molecule Biochemistry	5.67366	-1.982	C5,HSPA5,IGF1,PRDX2
	Organismal Development,Organismal Injury and Abnormalities	5.67366		ACE,AMBP,APOA1,BHMT,CFH,COLEC11,HP,HPX,IGF1,LOXL1,MST1,MYOCD,PGLYRP2,PRDX2,PSAP
	Cellular Function and Maintenance	5.66959	1.03	ACE,APOA1,C5,CAMP,CFH,CRP,F5,HLA-A,HPX,HSPA5,HSPA8,IGF1,ITIH3,LTF,MYOCD,PGLYRP2,PKM,PPIA,PRDX2,PSAP,SERPINF1
	Hematological Disease,Hereditary Disorder,Organismal Injury and Abnormalities	5.62709		F5,HABP2,PROS1
	Cellular Movement,Hematological System Development and Function,Immune Cell Trafficking,Inflammatory Response	5.62709	-0.849	APOA1,CAMP,LCP1,PPIA
	Cellular Function and Maintenance,Hematological System Development and Function	5.62525	-1.667	ACE,APOA1,C5,CAMP,CFH,CRP,PROS1
	Cardiovascular Disease,Neurological Disease,Organismal Injury and Abnormalities	5.6216		ACE,APOA1,CFH,CRP,F5,IGF1,NRP1,PROS1
	Cellular Movement,Hematological System Development and Function,Immune Cell Trafficking,Inflammatory Response	5.61261	-1.585	APOA1,C5,CAMP,HP,LCP1,MST1,PPIA
	Cellular Movement	5.54975	-1.607	C5,HABP2,HSPA5,IGF1,NRP1,PKM,PPIA,PROS1
	Cell-To-Cell Signaling and Interaction	5.54212	-0.995	CAMP,CFH,HLA-A,HSPA5,IGF1,LTF,NRP1,PKM,PROS1,SERPINF1
	Cellular Development,Cellular Growth and Proliferation,Hematological System Development and Function,Hematopoiesis,Lymphoid Tissue Structure and Development,Tissue Development	5.52578	0.389	CAMP,CRP,F5,HLA-A,HP,HPX,IGF1,LCP1,LTF,NRP1,PGLYRP2,PKM,PRDX2,PSAP
	Neurological Disease,Skeletal and Muscular Disorders	5.50446		C5,C9,CFB,CRP,FGG,HP,HSPA5,HSPA8,IGF1,ITIH3,ITIH4,LTF,PKM,PPIA,PRDX2,PSAP
	Cellular Function and Maintenance	5.49894	-1.667	ACE,APOA1,C5,CAMP,CFH,CRP,PROS1
	Cellular Movement,Hematological System Development and Function,Immune Cell Trafficking,Inflammatory Response	5.47756	-0.52	APOA1,C2,C5,CAMP,CFB,CFH,CRP,LBP,PPIA
	Cell-To-Cell Signaling and Interaction,Hematological System Development and Function,Inflammatory Response	5.43652	-0.937	C5,CAMP,CFH,CRP,PROS1
	Dermatological Diseases and Conditions,Organismal Injury and Abnormalities	5.39362		C5,CAMP,CRP,HSPA5,HSPA8,LTF,NRP1,PKM,PM20D1,PPIA,PSAP
	Cell-To-Cell Signaling and Interaction,Hematological System Development and Function,Immune Cell Trafficking	5.35262	-0.897	APOA1,C5,CFH,LBP,LCP1,LTF
	Cardiovascular System Development and Function,Cellular Movement	5.33068	-0.574	APOA1,C5,CRP,HSPA5,IGF1,NRP1,PKM,PROS1,SERPINF1
	Lipid Metabolism,Small Molecule Biochemistry	5.32606	-1.236	APOA1,CAMP,IGF1,LBP,PSAP
	Cell-To-Cell Signaling and Interaction,Cellular Function and Maintenance,Inflammatory Response	5.3098	-1.626	ACE,AHSG,APOA1,CAMP,CFH,CRP,HSPA8,PKM,PROS1
	Protein Synthesis	5.28316	-0.515	APOA1,APOM,BHMT,CRP,FGG
	Cellular Movement,Hematological System Development and Function,Immune Cell Trafficking,Inflammatory Response	5.27654	-1.512	APOA1,C5,CAMP,HP,LBP,LCP1,MST1,PPIA,Retnlg
	Cardiovascular System Development and Function,Organismal Development	5.26761	-0.133	C5,CAMP,CFB,IGF1,NRP1,SERPINF1
	Neurological Disease	5.2644		C5,C9,CRP,DYNC1H1,FGG,HP,HSPA5,HSPA8,IGF1,ITIH3,ITIH4,LTF,NRP1,PKM,PPIA,PRDX2,PSAP
	Cancer,Organismal Injury and Abnormalities	5.25571	0.245	ACE,ACTBL2,AHSG,ALDOB,AMBP,APOA1,BHMT,C2,C5,C8G,C9,CAMP,CEP250,CFB,CFH,COL24A1,COLEC11,CRP,DYNC1H1,F12,F5,FGG,HABP2,HLA-A,HP,HPX,HSPA5,HSPA8,IGF1,ITIH1,ITIH2,ITIH3,ITIH4,LAP3,LCP1,LOXL1,LTF,MST1,MYOCD,NRP1,PGLYRP2,PI16,PKM,PM20D1,PPIA,PRDX2,PROS1,PROZ,PSMA7,SAA2-SAA4,SERPINF1
	Molecular Transport	5.24795	-1.958	ACE,APOA1,CAMP,CRP,FGG,HSPA5,HSPA8,IGF1,PKM,PPIA,PSAP
	Cancer,Gastrointestinal Disease,Organismal Injury and Abnormalities	5.23807		ACE,ALDOB,AMBP,APOA1,BHMT,C5,C9,CEP250,CFB,COL24A1,CRP,DYNC1H1,F12,F5,FGG,HABP2,HLA-A,HP,HPX,HSPA5,HSPA8,IGF1,ITIH1,ITIH2,ITIH4,LAP3,LOXL1,MYOCD,PI16,PKM,PM20D1,PROZ,PSAP,SAA2-SAA4,SERPINA10
	Neurological Disease,Organismal Injury and Abnormalities,Psychological Disorders	5.22185		C9,CRP,FGG,HP,HSPA5,HSPA8,IGF1,ITIH3,ITIH4,LTF,PKM,PPIA,PRDX2,PSAP
	Cell-To-Cell Signaling and Interaction,Hematological System Development and Function	5.22185	-0.816	APOA1,CRP,FGG,LBP,LCP1,NRP1,PRDX2
	Hereditary Disorder,Ophthalmic Disease,Organismal Injury and Abnormalities	5.21824		C2,CFB
	Organismal Injury and Abnormalities,Renal and Urological Disease	5.21824		CFB,CRP
	Cardiovascular Disease,Hematological Disease,Organismal Injury and Abnormalities	5.21325		AMBP,C5,CFB,CFH,CRP,HPX,HSPA5,IGF1,PPIA,PRDX2
	Cell-To-Cell Signaling and Interaction	5.19044		CFH,HABP2,LTF
	Cancer,Organismal Injury and Abnormalities,Reproductive System Disease	5.17718		ACE,ACTBL2,ALDOB,APOA1,C2,C5,C9,CAMP,CEP250,CFB,CFH,COL24A1,COLEC11,CRP,DYNC1H1,F5,FGG,HABP2,HLA-A,HP,HPX,HSPA5,IGF1,ITIH1,ITIH2,ITIH3,ITIH4,LAP3,LBP,LCP1,LOXL1,LTF,MST1,MYOCD,NRP1,PI16,PKM,PM20D1,PPIA,PROS1,PSMA7,SAA2-SAA4,SERPINF1
	Cell Death and Survival	5.14206	1.964	HSPA5,IGF1,PROS1,SERPINF1
	Cell-To-Cell Signaling and Interaction	5.13194	-1.48	ACE,APOA1,C5,CAMP,CFH,CRP,PROS1
	Hereditary Disorder,Neurological Disease,Organismal Injury and Abnormalities,Psychological Disorders,Skeletal and Muscular Disorders	5.1296		C9,CRP,FGG,HP,HSPA5,HSPA8,IGF1,ITIH3,ITIH4,PKM,PPIA,PRDX2
	Carbohydrate Metabolism	5.10791	-0.21	AMBP,APOA1,BHMT,C5,CAMP,CFB,HSPA5,IGF1,LBP,LTF,PKM
	Carbohydrate Metabolism,Lipid Metabolism,Small Molecule Biochemistry	5.10073		APOA1,CAMP,LBP
	Cell-To-Cell Signaling and Interaction,Hematological System Development and Function,Immune Cell Trafficking,Inflammatory Response	5.0804	-1.709	APOA1,C5,CFH,CRP,LCP1,PRDX2
	Cell Death and Survival,Organismal Injury and Abnormalities,Renal and Urological Disease	5.07314	0.218	C5,CFB,IGF1,MST1
	Protein Synthesis	5.05651	-1.701	ACE,AHSG,AMBP,APOA1,APOM,C5,F12,F5,FGG,HABP2,HSPA5,HSPA8,IGF1,ITIH2,LTF,SERPINA10
	Cardiovascular Disease,Neurological Disease,Organismal Injury and Abnormalities	5.04479		APOA1,F5,IGF1,NRP1,PROS1
	Cardiovascular Disease,Organismal Injury and Abnormalities	5.01773		ACE,AHSG,APOA1,CFH,CRP,F5,IGF1,LCP1,NRP1,PROS1
	Cell Death and Survival	5.01728		C9,CFB,CFH
	Endocrine System Disorders,Metabolic Disease,Organismal Injury and Abnormalities	5.01728		ACE,APOA1,CRP,LBP,LTF,PRDX2
	Organismal Injury and Abnormalities,Respiratory Disease	5.01728		ACE,AHSG,C5,F12,HABP2,HSPA5
	Endocrine System Disorders,Gastrointestinal Disease,Inflammatory Disease,Inflammatory Response,Organismal Injury and Abnormalities	5.00745		APOA1,HSPA5,PKM,PRDX2
	Cancer,Organismal Injury and Abnormalities	4.99568		ACE,ACTBL2,APOA1,C2,C5,C9,CEP250,CFB,CFH,COL24A1,CRP,DYNC1H1,F5,HLA-A,HP,HPX,HSPA5,IGF1,ITIH3,LBP,LCP1,LOXL1,LTF,MST1,MYOCD,NRP1,PI16,PKM,PM20D1,PPIA,PSMA7,SERPINF1
	Cellular Function and Maintenance	4.99568	0.816	C5,CFH,CRP,F5,HLA-A,HPX,IGF1,PGLYRP2,PKM,PRDX2,PSAP
	Cardiovascular Disease,Hematological Disease,Metabolic Disease,Organismal Injury and Abnormalities	4.9914		APOA1,CRP,LBP,LCP1,PPIA,SERPINF1
	Cardiovascular Disease,Organismal Injury and Abnormalities	4.97062	1.342	CRP,HP,HPX,PI16,SERPINF1
	Cancer,Gastrointestinal Disease,Hepatic System Disease,Organismal Injury and Abnormalities	4.95468		ALDOB,BHMT,HSPA5,HSPA8,PKM
	Cardiovascular Disease,Cell Death and Survival,Connective Tissue Disorders,Hematological Disease,Organismal Injury and Abnormalities,Renal and Urological Disease	4.9393		C5,CFB,CFH
	Embryonic Development,Organismal Development	4.93554		ACE,APOA1,C5,CFH,HP,IGF1,LBP,MST1,MYOCD,PKM,PSAP
	Cardiovascular System Development and Function,Tissue Morphology	4.91364	-1.114	APOA1,CAMP,CRP,IGF1
	Free Radical Scavenging	4.89963	-2.236	ACE,C5,CAMP,CFB,CRP,IGF1,LTF,PPIA,PRDX2
	Carbohydrate Metabolism	4.8962	-0.926	ACE,AHSG,APOA1,C5,CAMP,HSPA5,IGF1,PKM
	Cellular Development,Cellular Growth and Proliferation,Hematological System Development and Function,Hematopoiesis,Lymphoid Tissue Structure and Development,Tissue Development	4.8962	-0.363	CAMP,CRP,F5,HLA-A,HPX,IGF1,LCP1,LTF,PGLYRP2,PKM,PRDX2,PSAP
	Free Radical Scavenging,Molecular Transport	4.88273		C5,CAMP,IGF1,PRDX2
	Embryonic Development,Organismal Development	4.8729		ACE,APOA1,C5,CFH,F5,HP,HSPA5,IGF1,LBP,LOXL1,MST1,MYOCD,NRP1,PKM,PRDX2,PSAP
	Inflammatory Response	4.86646		AHSG,CRP,LBP
	Cell Death and Survival,Organismal Injury and Abnormalities,Renal and Urological Disease	4.84771	0.692	C5,CFB,IGF1,MST1,PKM
	Cell-To-Cell Signaling and Interaction,Inflammatory Response	4.8041	-1.474	ACE,APOA1,C5,CAMP,CFH,CRP,PROS1
	Cancer,Organismal Injury and Abnormalities,Reproductive System Disease	4.7986		ACTBL2,APOA1,C2,C5,C9,CEP250,CFB,CFH,COL24A1,CRP,DYNC1H1,F5,HLA-A,HP,HPX,HSPA5,IGF1,ITIH3,LBP,LCP1,LOXL1,LTF,MST1,MYOCD,NRP1,PI16,PKM,PM20D1,PPIA,PSMA7,SERPINF1
	Dermatological Diseases and Conditions,Hematological Disease,Immunological Disease,Organismal Injury and Abnormalities	4.79588		C5,HLA-A,PPIA
	Immunological Disease	4.78516		C2,C5,C9,CFB,CFH,FGG,IGF1,LTF
	Neurological Disease	4.77211		APOA1,C9,CRP,FGG,HP,HSPA5,HSPA8,IGF1,ITIH3,ITIH4,PKM,PPIA,PRDX2
	Cardiovascular System Development and Function,Organismal Development,Visual System Development and Function	4.76447	-0.689	C5,CFB,IGF1,NRP1,SERPINF1
	Cell Death and Survival,Organismal Injury and Abnormalities	4.74958	0.201	ACE,CAMP,CRP,HSPA5,IGF1,ITIH4,MST1,PKM,PPIA,PRDX2,SERPINF1
	Organismal Injury and Abnormalities,Renal and Urological Disease	4.74232		CFB,CFH
	Cancer,Organismal Injury and Abnormalities	4.74232	-0.192	ACE,ACTBL2,AHSG,ALDOB,AMBP,APOA1,BHMT,C2,C5,C8G,C9,CEP250,CFB,CFH,COL24A1,COLEC11,CRP,DYNC1H1,F12,F5,FGG,HABP2,HLA-A,HP,HPX,HSPA5,HSPA8,IGF1,ITIH1,ITIH2,ITIH3,ITIH4,LAP3,LCP1,LOXL1,LTF,MST1,MYOCD,NRP1,PGLYRP2,PI16,PKM,PM20D1,PPIA,PRDX2,PROS1,PROZ,PSMA7,SAA2-SAA4
	Cellular Movement,Hematological System Development and Function,Immune Cell Trafficking	4.73993	-1.791	APOA1,C5,CAMP,HLA-A,HP,LCP1,MST1,PGLYRP2,PPIA,SERPINF1
	Cell-To-Cell Signaling and Interaction,Cellular Function and Maintenance,Hematological System Development and Function,Inflammatory Response	4.73993		CAMP,CFH,CRP,PROS1
	Inflammatory Response	4.73518	-1.864	ACE,AHSG,APOA1,C5,CAMP,CFH,CRP,HSPA8,LTF,PKM,PROS1
	Cardiovascular Disease,Organismal Injury and Abnormalities,Skeletal and Muscular Disorders	4.73283		ACE,APOA1,C5,CRP,PPIA
	Cellular Movement,Hematological System Development and Function,Immune Cell Trafficking,Inflammatory Response	4.73049	-0.507	APOA1,C2,C5,CFB,CFH,HSPA5,LBP,PPIA
	Dermatological Diseases and Conditions,Organismal Injury and Abnormalities	4.72816		C5,HLA-A,PPIA
	Cell-To-Cell Signaling and Interaction,Cellular Function and Maintenance,Hematological System Development and Function	4.72354	-1.145	ACE,APOA1,CAMP,CFH,CRP,PROS1
	Ophthalmic Disease,Organismal Injury and Abnormalities	4.7122		C2,C9,CFB,CFH
	Cell-To-Cell Signaling and Interaction,Cellular Function and Maintenance,Inflammatory Response	4.70333	-1.145	ACE,APOA1,CAMP,CFH,CRP,PROS1
	Cellular Movement,Hematological System Development and Function,Immune Cell Trafficking	4.70115	-0.564	APOA1,C2,C5,CFB,CFH,LBP,PPIA
	Respiratory Disease	4.70115		ACE,C5,CAMP,F12,HABP2,HP,LTF
	Gastrointestinal Disease,Organismal Injury and Abnormalities	4.68613	-1.131	C2,C5,CFB,LTF
	Cardiovascular Disease,Organismal Injury and Abnormalities	4.67985		ACE,APOA1,C5,CRP,F12,PPIA
	Antimicrobial Response,Inflammatory Response	4.67778		C5,CAMP,COLEC11,HLA-A,HSPA8,LTF,PGLYRP2,PPIA
	Organismal Development	4.67162		ACE,AMBP,APOA1,BHMT,C5,CFB,CFH,COLEC11,HP,HPX,IGF1,LOXL1,MST1,MYOCD,NRP1,PGLYRP2,PPIA,PRDX2,PSAP
	Organismal Survival	4.66555	3.415	ACE,AMBP,APOA1,C5,CAMP,CFB,CFH,CRP,DYNC1H1,F5,FGG,HP,HSPA5,IGF1,LCP1,MYOCD,NRP1,PGLYRP2,PKM,PPIA,PROS1,PROZ,PSAP,SERPINA10
	Cardiovascular Disease,Organismal Injury and Abnormalities	4.64782		APOA1,CRP,F5,FGG,IGF1,PPIA
	Cell-To-Cell Signaling and Interaction,Inflammatory Response	4.64589	-1.348	ACE,APOA1,C5,CAMP,CFH,CRP,LTF,PROS1
	Organismal Injury and Abnormalities,Renal and Urological Disease	4.62893		ACE,C5,CFB,CRP,F5,MST1,PPIA
	Gastrointestinal Disease,Inflammatory Disease,Inflammatory Response,Organismal Injury and Abnormalities	4.62709		CAMP,CFB,HP,LBP,Retnlg,Serpina3g (includes others)
	Dermatological Diseases and Conditions,Gastrointestinal Disease,Immunological Disease,Organismal Injury and Abnormalities	4.60555		C5,HLA-A,PPIA
	Infectious Diseases	4.59688		C5,CAMP,CRP,F5,HLA-A,LBP,LTF
	Cancer,Organismal Injury and Abnormalities	4.59007		ACE,ACTBL2,ALDOB,AMBP,APOA1,C2,C5,C8G,C9,CAMP,CEP250,CFB,CFH,COL24A1,COLEC11,CRP,DYNC1H1,F5,FGG,HABP2,HLA-A,HP,HPX,HSPA5,HSPA8,IGF1,ITIH1,ITIH2,ITIH3,ITIH4,LAP3,LBP,LCP1,LOXL1,LTF,MST1,MYOCD,NRP1,PI16,PKM,PM20D1,PPIA,PRDX2,PROS1,PSAP,PSMA7,SAA2-SAA4,SERPINF1
	Endocrine System Disorders,Gastrointestinal Disease,Immunological Disease,Metabolic Disease,Organismal Injury and Abnormalities	4.5784		APOM,CFB,CFH,CRP,HLA-A,IGF1,ITIH4,LCP1,PPIA
	Renal and Urological System Development and Function	4.57512		ACE,C5,CFH,COLEC11,HP,IGF1,MYOCD,PSAP
	Cancer,Organismal Injury and Abnormalities	4.57187	-0.054	ACE,ACTBL2,AHSG,ALDOB,AMBP,APOA1,BHMT,C2,C5,C8G,C9,CEP250,CFB,CFH,COL24A1,COLEC11,CRP,DYNC1H1,F12,F5,FGG,HABP2,HLA-A,HP,HPX,HSPA5,HSPA8,IGF1,ITIH1,ITIH2,ITIH3,ITIH4,LAP3,LCP1,LOXL1,LTF,MST1,MYOCD,NRP1,PGLYRP2,PI16,PKM,PM20D1,PPIA,PRDX2,PROS1,PROZ,PSMA7,SAA2-SAA4
	Dermatological Diseases and Conditions,Organismal Injury and Abnormalities	4.53313		C5,F5,PPIA,PROS1
	Cardiovascular Disease,Hematological Disease,Metabolic Disease,Organismal Injury and Abnormalities	4.51004		APOA1,CRP,LCP1,SERPINF1
	Cell-To-Cell Signaling and Interaction,Cellular Function and Maintenance,Inflammatory Response	4.51004	-0.651	ACE,CAMP,CFH,CRP
	Cellular Assembly and Organization,Inflammatory Response	4.49485		ACE,C5,HPX
	Cell-To-Cell Signaling and Interaction,Hematological System Development and Function,Immune Cell Trafficking	4.49214	-0.8	APOA1,C5,CFH,LCP1,LTF
	Cardiovascular Disease,Organismal Injury and Abnormalities,Tissue Morphology	4.47496		APOA1,CRP,F12,FGG,HLA-A,PPIA
	Organismal Injury and Abnormalities,Renal and Urological Disease	4.47496	0.152	ACE,CFB,CFH,CRP,MST1,PKM
	Cardiovascular Disease,Organismal Injury and Abnormalities	4.46471		ACE,APOA1,C5,CRP,F5,PPIA
	Cellular Movement	4.46344	-0.375	APOA1,C2,C5,CFB,CFH,HSPA5,LBP,PPIA
	Protein Synthesis	4.46218	-0.783	APOA1,APOM,BHMT,CRP
	Cardiovascular Disease,Hematological Disease,Organismal Injury and Abnormalities	4.46218		F5,HABP2,PROS1,SERPINA10
	Cancer,Organismal Injury and Abnormalities	4.45967		ACE,ACTBL2,AHSG,ALDOB,AMBP,APOA1,BHMT,C2,C5,C8G,C9,CEP250,CFB,CFH,COL24A1,COLEC11,CRP,DYNC1H1,F12,F5,FGG,HABP2,HLA-A,HP,HPX,HSPA5,HSPA8,IGF1,ITIH1,ITIH2,ITIH3,ITIH4,LAP3,LBP,LCP1,LOXL1,LTF,MST1,MYOCD,NRP1,PGLYRP2,PI16,PKM,PM20D1,PPIA,PRDX2,PROS1,PROZ,PSAP,PSMA7,SAA2-SAA4,SERPINF1
	Hematological System Development and Function	4.44129		IGF1,LBP
	Endocrine System Disorders,Gastrointestinal Disease,Immunological Disease,Inflammatory Disease,Inflammatory Response,Organismal Injury and Abnormalities	4.44129		APOA1,PKM,PRDX2
	Cellular Movement,Hair and Skin Development and Function	4.44129		APOA1,CAMP,PPIA
	Cardiovascular System Development and Function,Cell-To-Cell Signaling and Interaction	4.4168		C5,CAMP,LBP,PPIA
	Inflammatory Disease,Inflammatory Response,Organismal Injury and Abnormalities,Renal and Urological Disease	4.4045	1.467	ACE,AMBP,C5,CFB,CFH,CRP,IGF1,PPIA
	Organismal Injury and Abnormalities,Reproductive System Disease	4.39469		C5,F5,FGG,PPIA
	Cardiovascular System Development and Function,Cellular Movement	4.36051	-1.739	C5,HSPA5,IGF1,NRP1,PKM,PROS1
	Cancer,Organismal Injury and Abnormalities	4.35556	0.236	ACE,ACTBL2,AHSG,ALDOB,AMBP,APOA1,BHMT,C2,C5,C8G,C9,CAMP,CEP250,CFB,CFH,COL24A1,COLEC11,CRP,DYNC1H1,F12,F5,FGG,HABP2,HLA-A,HP,HPX,HSPA5,HSPA8,IGF1,ITIH1,ITIH2,ITIH3,ITIH4,LAP3,LCP1,LOXL1,LTF,MST1,MYOCD,NRP1,PGLYRP2,PI16,PKM,PM20D1,PPIA,PRDX2,PROS1,PROZ,PSAP,PSMA7,SAA2-SAA4,SERPINA10,SERPINF1
	Cancer,Gastrointestinal Disease,Hepatic System Disease,Organismal Injury and Abnormalities	4.35067		ACE,ALDOB,APOA1,BHMT,C5,C9,CEP250,CFB,COL24A1,DYNC1H1,F12,F5,FGG,HABP2,HP,HPX,HSPA5,HSPA8,IGF1,ITIH1,ITIH2,ITIH4,LAP3,LOXL1,MYOCD,PI16,PKM,PM20D1,PROZ,PSAP,SAA2-SAA4,SERPINA10
	Cell-To-Cell Signaling and Interaction	4.34294		C5,CAMP,IGF1
	Gastrointestinal Disease,Organismal Injury and Abnormalities	4.34294		C2,C5,CFB
	Cancer,Gastrointestinal Disease,Hepatic System Disease,Organismal Injury and Abnormalities	4.34294		HSPA5,HSPA8,LAP3
	Cell-To-Cell Signaling and Interaction,Hematological System Development and Function	4.34199	-0.447	APOA1,CRP,FGG,LBP,LCP1,PRDX2
	Cancer,Organismal Injury and Abnormalities	4.34008	-0.152	ACE,ACTBL2,AHSG,ALDOB,AMBP,APOA1,BHMT,C2,C5,C8G,C9,CEP250,CFB,CFH,COL24A1,COLEC11,CRP,DYNC1H1,F12,F5,FGG,HABP2,HLA-A,HPX,HSPA5,HSPA8,IGF1,ITIH1,ITIH2,ITIH3,ITIH4,LAP3,LCP1,LOXL1,LTF,MST1,MYOCD,NRP1,PGLYRP2,PI16,PKM,PM20D1,PPIA,PRDX2,PROS1,PROZ,PSMA7,SAA2-SAA4
	Tissue Morphology	4.33068	-1.122	AMBP,APOA1,BHMT,C5,CAMP,CFH,CRP,HLA-A,HP,HPX,HSPA5,IGF1,MST1,NRP1,PKM,PPIA,PRDX2,PROS1,PSAP,SERPINF1
	Molecular Transport	4.32975	-1.725	ACE,APOA1,APOM,CAMP,CRP,FGG,HLA-A,HP,HPX,HSPA5,HSPA8,IGF1,LBP,LTF,PKM,PPIA,PSAP,SERPINF1
	Gastrointestinal Disease,Inflammatory Disease	4.3279		CAMP,CRP,F5,IGF1,LBP,LTF,PKM
	Cancer,Organismal Injury and Abnormalities	4.31785	-0.023	AHSG,AMBP,APOA1,C5,CFH,FGG,IGF1,LTF,MYOCD,NRP1,PKM,PPIA,PRDX2,PSAP,SERPINF1
	Inflammatory Disease,Inflammatory Response,Organismal Injury and Abnormalities,Respiratory Disease	4.31605		ACE,AMBP,C5,CAMP,CRP,HLA-A,HSPA5,LBP
	Digestive System Development and Function,Gastrointestinal Disease,Hepatic System Development and Function,Hepatic System Disease,Inflammatory Disease,Inflammatory Response,Organ Development,Organismal Injury and Abnormalities	4.30539		APOA1,C5,HLA-A,HP,HPX,HSPA5,IGF1,PPIA
	Cellular Development,Embryonic Development,Nervous System Development and Function,Organ Development,Organismal Development,Tissue Development,Visual System Development and Function	4.29671		CFH,IGF1,SERPINF1
	Carbohydrate Metabolism,Lipid Metabolism,Small Molecule Biochemistry	4.29671		IGF1,LBP,PSAP
	Connective Tissue Disorders,Hematological Disease,Organismal Injury and Abnormalities	4.29073		AMBP,CRP,HPX,IGF1,PPIA
	Organismal Development	4.28819		ACE,AMBP,APOA1,BHMT,CFH,COLEC11,HP,HPX,IGF1,LOXL1,MST1,MYOCD,NRP1,PGLYRP2,PPIA,PRDX2,PSAP
	Free Radical Scavenging	4.28735	-1.131	ACE,C5,CRP,IGF1
	Cellular Development	4.28735		CFH,IGF1,MYOCD,PKM
	Cell-To-Cell Signaling and Interaction,Hematological System Development and Function,Immune Cell Trafficking,Inflammatory Response	4.2668		APOA1,CAMP,LBP,PKM
	Cellular Growth and Proliferation,Organismal Development	4.25104		APOA1,CAMP,LTF
	Cellular Movement,Embryonic Development	4.25104		APOA1,CAMP,PPIA
	Cardiovascular System Development and Function,Cellular Development,Organismal Development,Skeletal and Muscular System Development and Function,Tissue Development	4.25104		CFH,IGF1,MYOCD
	Organismal Development,Renal and Urological System Development and Function	4.25104		ACE,C5,CFH,IGF1,MST1,MYOCD,PSAP
	Cellular Movement,Hematological System Development and Function,Immune Cell Trafficking,Inflammatory Response	4.25104	-0.915	APOA1,C2,C5,CFB,CFH,LBP
	Cell Death and Survival,Organismal Injury and Abnormalities	4.24185	-1.584	CRP,HSPA5,IGF1,PPIA,PRDX2,SERPINF1
	Dermatological Diseases and Conditions,Organismal Injury and Abnormalities	4.22841		CAMP,CRP,NRP1,PPIA,PSAP
	Neurological Disease,Organismal Injury and Abnormalities	4.22548	0.147	ACE,ACTBL2,APOA1,C5,C9,CEP250,CFB,COL24A1,DYNC1H1,F12,F5,HSPA8,IGF1,ITIH2,ITIH4,LOXL1,NRP1,PGLYRP2,PKM,PM20D1,PPIA,PROS1,PROZ,PSAP,SERPINA10
	Lipid Metabolism,Molecular Transport,Small Molecule Biochemistry	4.2204		IGF1,PSAP
	Molecular Transport	4.2204		CAMP,HSPA8
	Cell Death and Survival	4.2204		CAMP,LTF
	Infectious Diseases	4.2204		C5,C9
	Infectious Diseases	4.2204		C5,C9
	Cell Morphology,Organ Morphology,Organismal Development,Renal and Urological System Development and Function	4.2204		C5,CFH
	Cell-To-Cell Signaling and Interaction	4.2204		CAMP,CFH
	DNA Replication, Recombination, and Repair	4.2204		CAMP,PPIA
	Cell Death and Survival,Organismal Injury and Abnormalities,Renal and Urological Disease	4.20761		IGF1,MST1,PKM
	Cell Death and Survival,Nervous System Development and Function	4.20761		C5,IGF1,SERPINF1
	Cardiovascular System Development and Function	4.17653		ACE,CFH,IGF1,MYOCD,NRP1,PPIA,PROS1,PSAP
	Carbohydrate Metabolism	4.17005	-1.489	ACE,AHSG,APOA1,C5,HSPA5,IGF1,PKM
	Cellular Movement,Renal and Urological System Development and Function	4.16558		APOA1,CAMP,PPIA
	Cellular Movement	4.15058	-1.288	APOA1,C5,CAMP,HP,LBP,MST1,PPIA
	Cell-To-Cell Signaling and Interaction,Hematological System Development and Function,Immune Cell Trafficking,Inflammatory Response	4.14813	-2	C5,CAMP,LBP,PPIA
	Hereditary Disorder,Ophthalmic Disease,Organismal Injury and Abnormalities	4.14691		C2,C9,CEP250,CFB,CFH,PSAP
	Molecular Transport	4.13668	-1.011	C5,HLA-A,HP,HPX,HSPA5,IGF1,LTF,PPIA,PRDX2
	Cancer,Organismal Injury and Abnormalities	4.12321	-0.023	AHSG,AMBP,APOA1,C5,FGG,IGF1,LTF,MYOCD,NRP1,PKM,PPIA,PRDX2,PSAP,SERPINF1
	Organismal Injury and Abnormalities,Renal and Urological Disease	4.12033		ACE,C5,CRP,F5,PPIA
	Cell Death and Survival	4.11014	-1.192	IGF1,NRP1,PKM,PRDX2
	Immunological Disease,Inflammatory Disease,Inflammatory Response,Organismal Injury and Abnormalities,Renal and Urological Disease	4.11014		ACE,CFH,CRP,PPIA
	Lipid Metabolism,Small Molecule Biochemistry	4.10902	-1.704	APOA1,APOM,C5,CAMP,HSPA8,IGF1,LBP,LTF,PKM,PSAP
	Cellular Movement	4.10846	-1.342	AHSG,IGF1,LTF,MST1,SERPINF1
	Cardiovascular Disease,Organismal Injury and Abnormalities	4.10513		ACE,C5,CFB,CFH,HLA-A,PPIA
	Cancer,Organismal Injury and Abnormalities	4.09098		ACE,ACTBL2,ALDOB,APOA1,C2,C5,C9,CAMP,CEP250,CFB,CFH,COL24A1,COLEC11,CRP,DYNC1H1,F5,FGG,HABP2,HLA-A,HP,HPX,HSPA5,HSPA8,IGF1,ITIH1,ITIH2,ITIH3,ITIH4,LAP3,LBP,LCP1,LOXL1,LTF,MST1,MYOCD,NRP1,PI16,PKM,PM20D1,PPIA,PROS1,PSAP,PSMA7,SAA2-SAA4,SERPINF1
	Cellular Development,Cellular Growth and Proliferation,Hematological System Development and Function,Lymphoid Tissue Structure and Development	4.08938	-0.453	CAMP,CRP,HPX,HSPA5,HSPA8,IGF1,LCP1,LTF,PRDX2,Serpina3g (includes others)
	Inflammatory Disease,Inflammatory Response,Organismal Injury and Abnormalities,Respiratory Disease	4.08566		ACE,C5,CAMP,CRP,LBP
	Hereditary Disorder,Immunological Disease,Organismal Injury and Abnormalities	4.07417		C2,C5,CFB,FGG,IGF1
	Cellular Function and Maintenance	4.06601	-1.154	ACE,APOA1,CAMP,CFH,CRP,PKM,PROS1
	Cellular Movement,Hematological System Development and Function,Immune Cell Trafficking,Inflammatory Response	4.05355	-1.29	APOA1,C5,CAMP,HP,LBP,MST1,PPIA
	Cardiovascular System Development and Function,Tissue Development	4.04769		CAMP,LTF,NRP1
	Cellular Movement,Hematological System Development and Function,Immune Cell Trafficking,Inflammatory Response	4.04769		APOA1,LCP1,PPIA
	Carbohydrate Metabolism,Small Molecule Biochemistry	4.04528		APOA1,CAMP
	Hereditary Disorder,Ophthalmic Disease,Organismal Injury and Abnormalities	4.04528		C9,CFH
	Cell Death and Survival	4.04528		CAMP,LTF
	Hematological Disease	4.04528		C5,HPX
	Gastrointestinal Disease,Hepatic System Disease,Organismal Injury and Abnormalities	4.0348		APOA1,C5,CRP,FGG,HP,HPX,PPIA
	Cellular Assembly and Organization,Cellular Function and Maintenance	4.01055		C5,CAMP,FGG
	Cardiovascular Disease,Organismal Injury and Abnormalities,Renal and Urological Disease	4.01055		C5,CFB,COLEC11
	Cell-To-Cell Signaling and Interaction,Hematological System Development and Function,Immune Cell Trafficking,Inflammatory Response	4.00745	-1.969	C5,CAMP,HLA-A,HPX,IGF1,LBP,LTF,PGLYRP2,PPIA
	Cardiovascular Disease	3.9914		APOA1,CRP,F5,FGG,IGF1,MYOCD,PPIA
	Cell-To-Cell Signaling and Interaction,Cellular Growth and Proliferation	3.9914	-2.603	APOA1,C5,CAMP,IGF1,LTF,MST1,PSAP
	Cellular Movement	3.97469		CAMP,IGF1,SERPINF1
	Cellular Movement,Organismal Injury and Abnormalities,Respiratory Disease	3.96658		C2,C5,CFB,HSPA5
	Cardiovascular Disease,Neurological Disease,Organismal Injury and Abnormalities	3.95078		APOA1,F5,IGF1,PROS1
	Cellular Compromise	3.95078	1.925	CFH,HP,HPX,IGF1
	Organ Morphology,Organismal Development,Renal and Urological System Development and Function	3.94692		ACE,C5,CFH,COLEC11,HP,IGF1,PSAP
	Cellular Development,Cellular Growth and Proliferation,Hematological System Development and Function,Lymphoid Tissue Structure and Development	3.92082	-0.564	CAMP,CRP,HPX,HSPA5,HSPA8,IGF1,LCP1,LTF,PPIA,PRDX2,Serpina3g (includes others)
	Cellular Development,Cellular Growth and Proliferation	3.92082	-0.156	APOA1,CAMP,CRP,HPX,HSPA5,HSPA8,IGF1,LCP1,LTF,PPIA,PRDX2,Serpina3g (includes others)
	Cell Signaling,Inflammatory Response	3.89963		CFB,CFH
	Cardiovascular Disease	3.89963		ACE,CRP
	Cell Death and Survival	3.89963		CAMP,CFH
	Cardiovascular Disease,Organismal Injury and Abnormalities,Skeletal and Muscular Disorders	3.89963		C5,IGF1
	Cellular Movement,Hematological System Development and Function,Immune Cell Trafficking,Inflammatory Response	3.89963		C5,MST1
	Organismal Injury and Abnormalities	3.89279		C5,CAMP,CFB,CRP,IGF1,LTF
	Organismal Injury and Abnormalities,Renal and Urological Disease	3.87615	0.784	ACE,CFB,CFH,CRP,MST1,PKM,PSAP
	Hereditary Disorder,Immunological Disease,Organismal Injury and Abnormalities	3.87615		C2,C5,CFB,FGG,IGF1,PPIA
	Cellular Function and Maintenance	3.8729		C5,HP,PROS1
	Connective Tissue Disorders,Inflammatory Disease,Inflammatory Response,Organismal Injury and Abnormalities,Skeletal and Muscular Disorders	3.86967	-1	APOA1,C5,CFB,FGG,PKM
	Cardiovascular Disease,Organismal Injury and Abnormalities	3.86967		APOA1,CRP,F5,FGG
	Respiratory Disease	3.85387		CRP,HSPA8,IGF1,LBP,LCP1,LOXL1,LTF,PRDX2
	Hereditary Disorder,Neurological Disease,Organismal Injury and Abnormalities	3.85387		ACE,AHSG,APOA1,C5,C9,CEP250,CRP,DYNC1H1,FGG,HP,HSPA5,HSPA8,IGF1,ITIH3,ITIH4,PKM,PPIA,PRDX2,PSAP,SERPINF1
	Metabolic Disease,Organismal Injury and Abnormalities,Renal and Urological Disease	3.85387		ACE,CFH,CRP,PKM
	Gastrointestinal Disease,Inflammatory Disease,Inflammatory Response,Organismal Injury and Abnormalities	3.83863		CAMP,CFB,HP,Retnlg,Serpina3g (includes others)
	Carbohydrate Metabolism,Molecular Transport,Small Molecule Biochemistry	3.83268	-1.161	ACE,AHSG,APOA1,HSPA5,IGF1,PKM
	Cardiovascular Disease,Cardiovascular System Development and Function,Organismal Injury and Abnormalities	3.82974		ACE,CFH,IGF1,MYOCD,NRP1,PROS1,PSAP
	Connective Tissue Disorders,Organismal Injury and Abnormalities,Skeletal and Muscular Disorders,Tissue Morphology	3.82974	-1.982	C5,CFB,IGF1,PKM,PRDX2
	Cell-mediated Immune Response,Cellular Development,Cellular Function and Maintenance,Cellular Growth and Proliferation,Embryonic Development,Hematological System Development and Function,Hematopoiesis,Lymphoid Tissue Structure and Development,Organ Development,Organismal Development,Tissue Development	3.79048	0.816	CRP,F5,HLA-A,HPX,IGF1,PGLYRP2,PKM,PRDX2,PSAP
	Cell Death and Survival	3.77469		CAMP,CRP,IGF1,LTF
	Cellular Movement,Hematological System Development and Function,Immune Cell Trafficking,Inflammatory Response	3.77469		C5,CAMP
	Lipid Metabolism,Small Molecule Biochemistry	3.77469		LBP,PSAP
	Cellular Movement,Hematological System Development and Function,Immune Cell Trafficking,Inflammatory Response	3.76955	-0.223	APOA1,C5,CAMP,LBP,PPIA
	Cell Death and Survival	3.767	-2.429	ACE,APOA1,C5,CAMP,CFH,HLA-A,HSPA5,HSPA8,IGF1,LTF,NRP1,PKM,PPIA,PRDX2,PSAP,PSMA7,SERPINF1
	Organismal Injury and Abnormalities,Renal and Urological Disease	3.74715		AHSG,AMBP,C5,PKM
	Inflammatory Response,Neurological Disease	3.72816	0.579	C5,CRP,F12,F5,HLA-A,HPX,HSPA5,IGF1
	Hereditary Disorder,Neurological Disease,Organismal Injury and Abnormalities	3.72125		ACE,AHSG,C5,C9,CRP,DYNC1H1,FGG,HP,HSPA5,HSPA8,IGF1,ITIH3,ITIH4,PKM,PPIA,PRDX2,PSAP
	Lipid Metabolism,Molecular Transport,Small Molecule Biochemistry	3.71897	-1.902	APOA1,APOM,HSPA8,IGF1,LBP,PSAP
	Cell Death and Survival	3.7167	-0.371	C9,CFB,CFH,HLA-A
	Lipid Metabolism,Molecular Transport,Small Molecule Biochemistry	3.7122	-1.044	APOA1,APOM,BHMT,CRP,HP,IGF1,PKM
	Cell-To-Cell Signaling and Interaction	3.70553	-1.131	C5,CRP,HSPA5,IGF1,PKM,PROS1
	Cell-To-Cell Signaling and Interaction,Hematological System Development and Function,Immune Cell Trafficking,Inflammatory Response	3.70333	-1.103	APOA1,C5,CFH,LCP1
	Cellular Development,Cellular Growth and Proliferation,Embryonic Development,Hematological System Development and Function,Hematopoiesis,Lymphoid Tissue Structure and Development,Organ Development,Organismal Development,Tissue Development	3.69897	0.227	CRP,F5,HLA-A,HPX,IGF1,LCP1,PGLYRP2,PKM,PRDX2,PSAP
	Immunological Disease	3.6968	1.067	C5,CAMP,CFH,HLA-A,HSPA5,LBP,PPIA,PSAP
	Endocrine System Disorders,Gastrointestinal Disease,Metabolic Disease,Ophthalmic Disease,Organismal Injury and Abnormalities	3.69037		CRP,IGF1,SERPINF1
	Cardiovascular Disease,Organismal Injury and Abnormalities,Skeletal and Muscular Disorders	3.68403		ACE,APOA1,C5,CRP,FGG,PPIA
	Molecular Transport	3.67366	0.399	HLA-A,HP,HPX,LTF
	Gastrointestinal Disease,Inflammatory Disease	3.66959		CAMP,CRP,F5,IGF1,LBP,LTF,PKM,Serpina3g (includes others)
	Cardiovascular Disease,Cell Death and Survival,Connective Tissue Disorders,Hematological Disease,Hereditary Disorder,Organismal Injury and Abnormalities,Renal and Urological Disease	3.66756		CFB,CFH
	Cardiovascular Disease,Hematological Disease,Organismal Injury and Abnormalities,Renal and Urological Disease	3.66756		C2,CFB
	Cell Death and Survival,Nervous System Development and Function	3.66756		IGF1,SERPINF1
	Lipid Metabolism,Small Molecule Biochemistry	3.66354	-1.698	APOA1,APOM,C5,HSPA5,IGF1,PRDX2
	Cellular Assembly and Organization,Tissue Development	3.66354		ACE,HSPA5,IGF1
	Cardiovascular Disease,Connective Tissue Disorders,Hematological Disease,Hereditary Disorder,Organismal Injury and Abnormalities	3.65956		AMBP,CRP,HPX,IGF1
	Cellular Function and Maintenance	3.65758	-1.387	ACE,APOA1,C5,CAMP,PROS1
	Organismal Injury and Abnormalities	3.65365	1.091	ACE,APOA1,C5,CRP,FGG,HP,HPX,HSPA5,IGF1,MYOCD,PPIA
	Cancer,Gastrointestinal Disease,Organismal Injury and Abnormalities	3.63639	0.498	ACE,ACTBL2,AHSG,ALDOB,AMBP,APOA1,BHMT,C2,C5,C8G,C9,CAMP,CEP250,CFB,CFH,COL24A1,COLEC11,CRP,DYNC1H1,F12,F5,FGG,HABP2,HLA-A,HP,HPX,HSPA5,HSPA8,IGF1,ITIH1,ITIH2,ITIH3,ITIH4,LAP3,LBP,LCP1,LOXL1,LTF,MST1,MYOCD,NRP1,PGLYRP2,PI16,PKM,PM20D1,PPIA,PRDX2,PROS1,PROZ,PSAP,PSMA7,SAA2-SAA4,SERPINA10
	Connective Tissue Disorders,Organismal Injury and Abnormalities,Tissue Morphology	3.63639		ACE,APOA1,IGF1
	Cell Death and Survival,Nervous System Development and Function	3.63639		HLA-A,IGF1,SERPINF1
	Post-Translational Modification,Protein Degradation,Protein Synthesis	3.63078	-1.067	ACE,C5,F12,HABP2,HSPA8,IGF1
	Endocrine System Disorders,Metabolic Disease,Organismal Injury and Abnormalities	3.60033		ACE,AHSG,APOA1,CRP,LBP,LTF,PRDX2
	Cancer,Organismal Injury and Abnormalities	3.59517		APOA1,BHMT,CFB,CFH,COL24A1,CRP,HLA-A,HP,IGF1,NRP1,PRDX2,SERPINF1
	Nutritional Disease	3.5784	1.982	APOA1,IGF1,LTF,MYOCD,PGLYRP2,PSAP
	Cardiovascular Disease	3.5784	-2	C5,CFB,COLEC11,PKM
	Organismal Injury and Abnormalities	3.57675	-1.165	APOA1,BHMT,CFB,CFH,COL24A1,CRP,HLA-A,HP,IGF1,NRP1,PRDX2,PROS1,SERPINF1
	Cell Death and Survival,Cell Morphology,Embryonic Development,Nervous System Development and Function,Ophthalmic Disease,Organ Development,Organ Morphology,Organismal Development,Organismal Injury and Abnormalities,Tissue Development,Tissue Morphology,Visual System Development and Function	3.57025		IGF1,SERPINF1
	Cardiovascular Disease,Hematological Disease,Metabolic Disease,Organismal Injury and Abnormalities	3.56543		APOA1,CRP,LBP,PPIA
	Lipid Metabolism,Molecular Transport,Small Molecule Biochemistry	3.55909	0.771	AHSG,APOA1,APOM,BHMT,CRP,IGF1,SAA2-SAA4
	Hematological System Development and Function,Tissue Morphology	3.55284	0.072	AMBP,APOA1,C5,CAMP,CFH,CRP,HLA-A,HPX,IGF1,PPIA,PRDX2,PROS1,PSAP
	Cancer,Organismal Injury and Abnormalities	3.53611		ACTBL2,APOA1,C2,C5,C8G,C9,CEP250,CFB,CFH,COL24A1,CRP,DYNC1H1,F12,F5,FGG,HLA-A,HP,HPX,HSPA5,IGF1,ITIH3,ITIH4,LBP,LCP1,LOXL1,LTF,MST1,MYOCD,NRP1,PI16,PKM,PM20D1,PPIA,PROS1,PROZ,PSMA7,SERPINF1
	Cell-To-Cell Signaling and Interaction,Hematological System Development and Function,Immune Cell Trafficking,Inflammatory Response	3.53165		CRP,LCP1,PRDX2
	Molecular Transport,Small Molecule Biochemistry	3.53165		C5,CAMP,F5
	Organismal Development	3.50031	-0.555	APOA1,F12,NRP1,PROS1,SERPINF1
	Gastrointestinal Disease,Immunological Disease,Ophthalmic Disease,Organismal Injury and Abnormalities	3.50031		APOA1,CRP,HP,PPIA
	Dermatological Diseases and Conditions,Organismal Injury and Abnormalities	3.49349	-1.353	ACE,AHSG,ALDOB,AMBP,APOA1,BHMT,C2,C5,C9,CAMP,CEP250,CFB,CFH,COL24A1,COLEC11,CRP,DYNC1H1,F12,F5,FGG,HABP2,HLA-A,HP,HPX,HSPA5,HSPA8,IGF1,ITIH1,ITIH2,ITIH3,LBP,LCP1,LTF,MST1,MYOCD,NRP1,PGLYRP2,PI16,PKM,PPIA,PROS1,PSAP,SAA2-SAA4,SERPINA10,SERPINF1
	Cancer,Organismal Injury and Abnormalities	3.49349	-0.042	ACE,ACTBL2,AHSG,ALDOB,AMBP,APOA1,BHMT,C2,C5,C8G,C9,CAMP,CEP250,CFB,CFH,COL24A1,COLEC11,CRP,DYNC1H1,F12,F5,FGG,HABP2,HLA-A,HP,HPX,HSPA5,HSPA8,IGF1,ITIH1,ITIH2,ITIH3,ITIH4,LAP3,LBP,LCP1,LOXL1,LTF,MST1,MYOCD,NRP1,PGLYRP2,PI16,PKM,PM20D1,PPIA,PRDX2,PROS1,PROZ,PSAP,PSMA7,SAA2-SAA4,SERPINA10,SERPINF1
	Hereditary Disorder,Organismal Injury and Abnormalities,Skeletal and Muscular Disorders	3.48945		ACE,DYNC1H1,HLA-A,IGF1,LBP,LOXL1,PSAP
	Cellular Function and Maintenance	3.48413		C5,CFH
	Cell Signaling	3.48413		MST1,NRP1
	Carbohydrate Metabolism,Small Molecule Biochemistry	3.48413		CFH,IGF1,ITIH2
	Inflammatory Disease,Inflammatory Response,Organismal Injury and Abnormalities,Respiratory Disease	3.48017		APOA1,C5,CRP,HSPA5,IGF1,LTF,PPIA
	Cancer,Organismal Injury and Abnormalities	3.47756		ACE,ACTBL2,ALDOB,APOA1,C2,C5,C8G,C9,CAMP,CFB,CFH,COL24A1,COLEC11,CRP,DYNC1H1,F5,FGG,HABP2,HLA-A,HP,HPX,HSPA5,HSPA8,IGF1,ITIH1,ITIH2,ITIH3,ITIH4,LAP3,LCP1,LOXL1,LTF,MST1,MYOCD,NRP1,PKM,PM20D1,PPIA,PROS1,PSAP,PSMA7,SAA2-SAA4,SERPINF1
	Developmental Disorder,Hereditary Disorder,Organismal Injury and Abnormalities,Skeletal and Muscular Disorders	3.47625		ACE,HLA-A,LBP,LOXL1,PSAP
	Cellular Movement,Hematological System Development and Function,Hypersensitivity Response,Immune Cell Trafficking	3.47496	0.605	C5,CAMP,LTF,PPIA
	Organismal Development	3.47108	-0.97	ACE,HABP2,IGF1,NRP1,PPIA,SERPINF1
	Lipid Metabolism,Small Molecule Biochemistry	3.46852	-1.768	APOA1,APOM,BHMT,C5,CAMP,HSPA5,HSPA8,IGF1,LTF,PKM,PRDX2
	Cardiovascular System Development and Function,Tissue Morphology	3.45967		APOA1,CRP,IGF1
	Cellular Development,Cellular Growth and Proliferation,Organ Development,Renal and Urological System Development and Function	3.45967		C5,IGF1,MST1
	Organismal Injury and Abnormalities,Reproductive System Disease	3.45967		C5,F5,PPIA
	Cell Death and Survival,Organismal Injury and Abnormalities	3.45967	-1.513	CRP,HSPA5,IGF1,PPIA,SERPINF1
	Nucleic Acid Metabolism,Small Molecule Biochemistry	3.4437		ACE,APOA1,CFH,HSPA8,PKM
	Cardiovascular System Development and Function,Ophthalmic Disease,Organismal Development,Organismal Injury and Abnormalities,Visual System Development and Function	3.43652		IGF1,NRP1,SERPINF1
	Inflammatory Disease,Organismal Injury and Abnormalities,Respiratory Disease	3.42597		ACE,C5,F12,HABP2
	Cell-To-Cell Signaling and Interaction,Inflammatory Response	3.41908	-1.181	ACE,APOA1,C5,CAMP,PROS1
	Dermatological Diseases and Conditions,Organismal Injury and Abnormalities	3.41454		C5,PPIA,PROS1
	Cell Death and Survival	3.40561		CAMP,LTF
	Cardiovascular Disease,Cellular Compromise,Organismal Injury and Abnormalities	3.40561		HP,HPX
	Cellular Growth and Proliferation,Organismal Development	3.40561		CAMP,LTF
	Cell Death and Survival	3.4034	2.18	CFH,HSPA5,HSPA8,IGF1,PRDX2
	Cell-To-Cell Signaling and Interaction,Hematological System Development and Function,Immune Cell Trafficking,Inflammatory Response	3.4023	-1.916	C5,CFH,F5,LTF
	Embryonic Development,Organ Development,Organismal Development,Renal and Urological System Development and Function,Tissue Development	3.39362		ACE,C5,CFH,IGF1,MST1,PSAP
	Protein Synthesis	3.39147		APOA1,CRP,FGG
	Cell Death and Survival,Nervous System Development and Function	3.39147		IGF1,PSAP,SERPINF1
	Organismal Injury and Abnormalities,Renal and Urological Disease,Renal and Urological System Development and Function	3.38722		ACE,CFH,COLEC11,HP,MYOCD,PSAP
	Cell Death and Survival	3.37161	-0.182	CAMP,CRP,LTF,PROS1,SERPINF1
	Endocrine System Disorders,Gastrointestinal Disease,Metabolic Disease,Organismal Injury and Abnormalities	3.36856		ACE,AMBP,BHMT,C9,COL24A1,CRP,IGF1,SERPINF1
	Developmental Disorder,Hereditary Disorder,Organismal Injury and Abnormalities,Skeletal and Muscular Disorders	3.36754		ACE,HLA-A,LOXL1,PSAP
	Cardiovascular System Development and Function,Cell-To-Cell Signaling and Interaction	3.36452	0	C5,F12,F5,HSPA5,NRP1
	Cancer,Gastrointestinal Disease,Organismal Injury and Abnormalities	3.36452	-1.067	ACE,ACTBL2,AHSG,ALDOB,AMBP,APOA1,BHMT,C2,C5,C8G,C9,CAMP,CEP250,CFB,CFH,COL24A1,COLEC11,CRP,DYNC1H1,F12,F5,FGG,HABP2,HLA-A,HP,HPX,HSPA5,HSPA8,IGF1,ITIH1,ITIH2,ITIH3,ITIH4,LAP3,LBP,LCP1,LOXL1,LTF,MST1,MYOCD,NRP1,PGLYRP2,PI16,PKM,PM20D1,PPIA,PROS1,PROZ,PSAP,PSMA7,SAA2-SAA4,SERPINA10
	Cancer,Organismal Injury and Abnormalities	3.36051		ACE,AHSG,C5,C9,CEP250,COL24A1,CRP,DYNC1H1,F12,F5,FGG,HLA-A,HP,HSPA5,HSPA8,IGF1,LCP1,LOXL1,MST1,MYOCD,NRP1,PGLYRP2,PI16,PKM,PPIA,SERPINF1
	Organismal Injury and Abnormalities,Renal and Urological Disease	3.35262		ACE,C5,CRP,F5,MYOCD,PPIA
	Cellular Development,Hematological System Development and Function,Lymphoid Tissue Structure and Development	3.34486	-1.067	APOA1,C5,CAMP,NRP1
	Hematological Disease,Infectious Diseases,Neurological Disease,Organismal Injury and Abnormalities	3.33442		C9,CFB
	Cell Death and Survival	3.33442		CRP,LTF
	Cell-To-Cell Signaling and Interaction	3.33442		NRP1,PKM
	Cell Death and Survival	3.31069		C5,IGF1,PSAP,SERPINF1
	Lipid Metabolism,Molecular Transport,Small Molecule Biochemistry	3.3019	-1.072	APOA1,APOM,BHMT,CRP,HP,IGF1,PKM,PSAP
	Psychological Disorders	3.30103		ACE,AMBP,CRP,IGF1,ITIH4,PSMA7
	Protein Synthesis	3.29073	0.277	AHSG,APOA1,APOM,BHMT,CRP,FGG,IGF1,PPIA
	Organismal Injury and Abnormalities,Respiratory Disease	3.28819		CRP,IGF1,LBP,LTF,PRDX2
	Nervous System Development and Function,Tissue Development	3.26761		C5,IGF1
	Hematological Disease	3.26761		FGG,PPIA
	Cellular Movement,Hematological System Development and Function,Immune Cell Trafficking,Inflammatory Response	3.26761		APOA1,C5
	Organismal Injury and Abnormalities,Respiratory Disease	3.2668		HSPA8,IGF1,LCP1,LTF,PPIA
	Cancer,Organismal Injury and Abnormalities	3.2636		ACTBL2,APOA1,C2,C5,C8G,C9,CEP250,CFB,CFH,COL24A1,COLEC11,CRP,DYNC1H1,F5,HLA-A,HP,HPX,HSPA5,IGF1,ITIH3,LBP,LCP1,LOXL1,LTF,MST1,MYOCD,NRP1,PI16,PKM,PM20D1,PPIA,PSMA7,SERPINF1
	Cancer,Organismal Injury and Abnormalities	3.25885		ACE,AHSG,ALDOB,AMBP,APOA1,BHMT,C2,C5,C8G,CEP250,CFB,CFH,COL24A1,COLEC11,CRP,DYNC1H1,F12,F5,FGG,HABP2,HLA-A,HPX,IGF1,ITIH1,ITIH2,ITIH3,ITIH4,LAP3,LBP,LCP1,LOXL1,LTF,MST1,MYOCD,NRP1,PGLYRP2,PI16,PKM,PM20D1,PPIA,PRDX2,PROS1,PROZ,PSAP,PSMA7,SAA2-SAA4,SERPINF1
	Immunological Disease	3.25571		ALDOB,C5,LTF,PPIA
	Protein Degradation,Protein Synthesis	3.25259	0.024	ACE,AMBP,APOA1,C5,F12,HABP2,HSPA5,HSPA8,IGF1
	Infectious Diseases	3.24642		C5,CRP,F5
	Cell Death and Survival	3.23582	-0.409	APOA1,C5,C9,HLA-A,HSPA5,IGF1,NRP1,PM20D1,PRDX2,SERPINF1
	Cancer,Gastrointestinal Disease,Hepatic System Disease,Organismal Injury and Abnormalities	3.22988		ALDOB,APOA1,BHMT,C9,F5,FGG,HP,HSPA5,HSPA8,IGF1,LAP3,MYOCD,PKM,PROZ
	Cancer,Organismal Injury and Abnormalities	3.21254		ACE,ACTBL2,ALDOB,APOA1,C2,C5,C8G,C9,CAMP,CFB,CFH,COL24A1,COLEC11,CRP,DYNC1H1,F5,FGG,HABP2,HLA-A,HP,HPX,HSPA5,HSPA8,IGF1,ITIH1,ITIH2,ITIH3,ITIH4,LAP3,LCP1,LOXL1,LTF,MST1,MYOCD,NRP1,PKM,PM20D1,PPIA,PROS1,PSAP,PSMA7,SAA2-SAA4
	Cell Death and Survival	3.21042	1.866	ACE,APOA1,C5,CAMP,CFB,CFH,CRP,DYNC1H1,HSPA5,HSPA8,IGF1,ITIH4,LTF,MST1,MYOCD,NRP1,PKM,PPIA,PRDX2,PROS1,PSAP,SERPINF1
	Cancer,Organismal Injury and Abnormalities	3.20901	-1	ACE,AHSG,C5,C9,CEP250,COL24A1,CRP,DYNC1H1,F12,F5,FGG,HLA-A,HP,HSPA5,HSPA8,IGF1,LCP1,LOXL1,MST1,MYOCD,NRP1,PGLYRP2,PI16,PKM,PPIA,SERPINF1
	Cell Death and Survival	3.20901	0.039	CAMP,CRP,IGF1,LTF,SERPINF1
	Cell Death and Survival	3.20761		CRP,IGF1,LTF
	Cancer,Gastrointestinal Disease,Inflammatory Disease,Organismal Injury and Abnormalities	3.20761		ALDOB,BHMT,C9
	Neurological Disease,Organismal Injury and Abnormalities	3.20761		HP,HPX,SERPINF1
	Amino Acid Metabolism,Molecular Transport,Small Molecule Biochemistry	3.20621		C5,CFH
	Connective Tissue Development and Function,Skeletal and Muscular System Development and Function	3.20621		IGF1,SERPINF1
	Cell Death and Survival,Connective Tissue Development and Function,Skeletal and Muscular System Development and Function	3.20621		IGF1,LTF
	Cancer,Organismal Injury and Abnormalities,Reproductive System Disease	3.19586		ALDOB,APOA1,C2,C5,C9,CFB,CFH,COL24A1,CRP,DYNC1H1,F5,HLA-A,HSPA5,HSPA8,IGF1,ITIH2,LCP1,LTF,MST1,MYOCD,NRP1,PKM,PM20D1,PROS1,PSAP,PSMA7
	Cellular Movement,Hematological System Development and Function,Hypersensitivity Response,Immune Cell Trafficking,Inflammatory Response	3.1891		C5,CAMP,PPIA
	Cardiovascular Disease,Organismal Injury and Abnormalities	3.1891		APOM,C5,CRP
	Developmental Disorder,Hereditary Disorder,Metabolic Disease,Organismal Injury and Abnormalities,Respiratory Disease	3.1891		CRP,IGF1,LTF
	Cellular Movement,Hematological System Development and Function,Immune Cell Trafficking,Inflammatory Response	3.18111	-2.369	APOA1,C5,CAMP,CFH,MST1,SERPINF1
	Cell-To-Cell Signaling and Interaction,Inflammatory Response	3.17263		APOA1,C5,CAMP,CRP
	Cellular Movement	3.17263	-0.13	IGF1,NRP1,PRDX2,SERPINF1
	Cardiovascular Disease,Hematological Disease,Hereditary Disorder,Metabolic Disease,Organismal Injury and Abnormalities	3.17005		APOA1,CRP,PPIA
	Cancer,Organismal Injury and Abnormalities,Reproductive System Disease	3.16813		APOA1,C2,C9,CAMP,CEP250,COL24A1,DYNC1H1,F5,HLA-A,HP,HSPA5,IGF1,ITIH3,LBP,LTF,MST1,MYOCD,PI16,PKM,PM20D1,PPIA,PSMA7,SERPINF1
	Inflammatory Disease,Inflammatory Response,Neurological Disease,Organismal Injury and Abnormalities	3.16368	0.579	C5,CRP,F12,HLA-A,HPX,HSPA5,IGF1
	Cell-To-Cell Signaling and Interaction,Cellular Movement,Hematological System Development and Function,Immune Cell Trafficking,Inflammatory Response	3.15181		APOA1,C5,CAMP
	Dermatological Diseases and Conditions,Organismal Injury and Abnormalities	3.14935		C5,PPIA
	Dermatological Diseases and Conditions,Organismal Injury and Abnormalities	3.14935		C5,PPIA
	Dermatological Diseases and Conditions,Gastrointestinal Disease,Immunological Disease,Organismal Injury and Abnormalities	3.14935		C5,PPIA
	Endocrine System Disorders,Organismal Injury and Abnormalities	3.14935		APOA1,PRDX2
	Lipid Metabolism,Small Molecule Biochemistry	3.14935		APOA1,APOM
	Cancer,Gastrointestinal Disease,Hepatic System Disease,Organismal Injury and Abnormalities	3.14206		BHMT,ITIH4,MST1,PKM
	Carbohydrate Metabolism,Lipid Metabolism,Small Molecule Biochemistry	3.13966	-2.219	APOA1,C5,HSPA5,IGF1,PRDX2
	Embryonic Development,Organ Development,Organismal Development,Respiratory System Development and Function,Tissue Development	3.1343		ACE,IGF1,MYOCD
	Cellular Growth and Proliferation,Tissue Development	3.12901	-1.516	C5,CAMP,HSPA5,IGF1,ITIH4,LTF,MST1,SERPINF1
	Cell Death and Survival,Organismal Injury and Abnormalities	3.12901	2.042	ACE,CAMP,HSPA5,IGF1,ITIH4,MST1,PKM,SERPINF1
	Post-Translational Modification	3.12901	-2.072	APOA1,CAMP,CRP,HSPA8,IGF1,MST1,NRP1,PPIA,PSAP
	Molecular Transport,Protein Trafficking	3.12263		FGG,IGF1,PPIA,PSAP
	Hematological System Development and Function,Organismal Functions	3.11634		ACE,C5,MYOCD
	Cellular Development,Hematological System Development and Function,Lymphoid Tissue Structure and Development	3.11238	-1.432	APOA1,C5,CAMP,LCP1,NRP1
	Cancer,Gastrointestinal Disease,Organismal Injury and Abnormalities	3.10018		AHSG,C2,C8G,C9,CAMP,CEP250,CFB,CFH,COL24A1,CRP,DYNC1H1,F12,F5,HLA-A,HSPA8,IGF1,ITIH2,ITIH3,ITIH4,LCP1,LTF,MYOCD,PGLYRP2,PI16,PKM,PM20D1,PPIA,PROS1,PROZ,PSMA7,SAA2-SAA4
	Organismal Injury and Abnormalities	3.09528		C5,CFB
	Dermatological Diseases and Conditions,Hematological Disease,Immunological Disease,Organismal Injury and Abnormalities	3.09528		C5,PPIA
	Cellular Function and Maintenance	3.09259		AMBP,APOA1,COLEC11,HP,HPX
	Cell Death and Survival	3.08302	1.544	CAMP,CFH,HSPA5,IGF1,PKM,SERPINF1
	Cell-To-Cell Signaling and Interaction,Hematological System Development and Function,Immune Cell Trafficking,Inflammatory Response	3.08197		C5,CFH,NRP1
	Hematological Disease,Hereditary Disorder,Organismal Injury and Abnormalities	3.08197		F12,F5,FGG
	Cancer,Gastrointestinal Disease,Organismal Injury and Abnormalities	3.06956		ACE,ACTBL2,AHSG,ALDOB,AMBP,APOA1,BHMT,C2,C5,C8G,C9,CAMP,CEP250,CFB,CFH,COL24A1,COLEC11,CRP,DYNC1H1,F12,F5,FGG,HABP2,HLA-A,HPX,HSPA5,HSPA8,IGF1,ITIH1,ITIH2,ITIH3,ITIH4,LAP3,LBP,LCP1,LOXL1,LTF,MST1,MYOCD,NRP1,PGLYRP2,PI16,PKM,PM20D1,PPIA,PROS1,PROZ,PSMA7,SAA2-SAA4
	Cancer,Endocrine System Disorders,Organismal Injury and Abnormalities	3.05998		ACE,AHSG,ALDOB,AMBP,APOA1,BHMT,C2,C5,C8G,CEP250,CFB,CFH,COL24A1,COLEC11,CRP,DYNC1H1,F12,F5,FGG,HABP2,HLA-A,HP,HPX,HSPA5,IGF1,ITIH1,ITIH2,ITIH3,ITIH4,LAP3,LBP,LCP1,LOXL1,LTF,MST1,NRP1,PGLYRP2,PI16,PKM,PM20D1,PPIA,PRDX2,PROS1,PROZ,PSAP,PSMA7,SAA2-SAA4,SERPINF1
	Cancer,Organismal Injury and Abnormalities,Respiratory Disease	3.05998	-0.714	ACE,AHSG,ALDOB,APOA1,C9,CAMP,CEP250,CFH,COL24A1,CRP,F5,FGG,HLA-A,HSPA5,HSPA8,IGF1,ITIH1,ITIH2,ITIH3,LAP3,LCP1,LTF,MYOCD,NRP1,PKM,PPIA,PRDX2,PROS1,PSAP,SAA2-SAA4
	Cell-To-Cell Signaling and Interaction,Cellular Growth and Proliferation	3.04818		C5,CAMP,IGF1
	Post-Translational Modification,Protein Degradation,Protein Synthesis	3.04672		ACE,C5,F12,HABP2,HSPA8
	Cardiovascular System Development and Function,Organismal Development	3.04672	-0.704	HABP2,IGF1,NRP1,PPIA,SERPINF1
	Cell Morphology,Embryonic Development,Nervous System Development and Function,Organ Development,Organ Morphology,Organismal Development,Tissue Development,Visual System Development and Function	3.04576		CFH,IGF1,LOXL1,SERPINF1
	Cellular Movement	3.04479		IGF1,PPIA
	Hereditary Disorder,Organismal Injury and Abnormalities	3.04479		ACE,F12
	Immunological Disease,Inflammatory Disease,Inflammatory Response,Neurological Disease,Organismal Injury and Abnormalities	3.04479		CRP,IGF1
	Carbohydrate Metabolism,Lipid Metabolism,Small Molecule Biochemistry	3.04479		IGF1,LBP
	Cardiovascular Disease,Organismal Injury and Abnormalities	3.04479		ACE,MYOCD
	Cardiovascular System Development and Function,Cellular Development,Cellular Growth and Proliferation,Embryonic Development,Organ Development,Organismal Development,Skeletal and Muscular System Development and Function,Tissue Development	3.04479		HSPA5,IGF1
	Cell-To-Cell Signaling and Interaction,Cellular Movement,Immune Cell Trafficking	3.04479		C5,CAMP
	Auditory Disease,Neurological Disease	3.03152		CEP250,IGF1,PSAP
	Psychological Disorders	3.0278		ACE,AMBP,CRP,IGF1,ITIH1,ITIH4,PSMA7
	Cell-To-Cell Signaling and Interaction,Cellular Movement,Hematological System Development and Function,Immune Cell Trafficking	3.02733	-1.154	APOA1,C5,CAMP,PGLYRP2
	Lipid Metabolism,Molecular Transport,Small Molecule Biochemistry	3.02365	-0.788	APOA1,APOM,BHMT,CRP,HP,PKM
	Cancer,Gastrointestinal Disease,Organismal Injury and Abnormalities	3.01954		ALDOB,BHMT,C9,CEP250,COLEC11,F5,LBP
	Cancer,Organismal Injury and Abnormalities	3.01773		ACE,ACTBL2,AHSG,ALDOB,AMBP,BHMT,C2,C5,C8G,CEP250,CFB,CFH,COL24A1,COLEC11,CRP,DYNC1H1,F12,F5,FGG,HABP2,HLA-A,HPX,HSPA8,IGF1,ITIH1,ITIH2,ITIH3,ITIH4,LAP3,LBP,LCP1,LOXL1,LTF,MST1,MYOCD,NRP1,PGLYRP2,PI16,PKM,PM20D1,PPIA,PRDX2,PROS1,PROZ,PSAP,PSMA7,SAA2-SAA4,SERPINA10,SERPINF1
	Organismal Injury and Abnormalities,Renal and Urological Disease	3.01547		ACE,IGF1,PSAP
	Connective Tissue Disorders,Organismal Injury and Abnormalities	3.00922		ACE,APOA1,HSPA5,IGF1
