# Supplementary material for: Plasma Proteomic Changes of Atherosclerosis after Exercise in ApoE Knockout Mice
Source: Biology (Basel). 2022 Feb 6;11(2):253. doi: 10.3390/biology11020253 (PMC8869651; doi:10.3390/biology11020253)
Supplement: Supplementary file 1 [file biology-11-00253-s001.zip › biology-1545669-proteomic results.xlsx]

## Sheet: ApoE-ApoEH-Total
Group-Info	ApoE Sample-13(T-SPC= 43597)	ApoE Sample-14(T-SPC= 45131)	ApoE Sample-15(T-SPC= 43291)	ApoE Sample-16(T-SPC= 44431)	ApoE Sample-17(T-SPC= 45738)	ApoE Sample-18(T-SPC= 45018)	ApoE-H Sample-19(T-SPC= 45249)	ApoE-H Sample-20(T-SPC= 44984)	ApoE-H Sample-21(T-SPC= 44858)	ApoE-H Sample-22(T-SPC= 45635)	ApoE-H Sample-23(T-SPC= 44629)	ApoE-H Sample-24(T-SPC= 47037)
2	File:2 , EC1_190409.raw , (SPC=43597)	File:2 , EC2_190409.raw , (SPC=45131)	File:2 , EC3_190409.raw , (SPC=43291)	File:2 , EC5_190409.raw , (SPC=44431)	File:2 , EC6_190409.raw , (SPC=45738)	File:2 , EC7_190409.raw , (SPC=45018)	File:1 , EH1_190409.raw , (SPC=45249)	File:1 , EH3_190409.raw , (SPC=44984)	File:1 , EH4_190409.raw , (SPC=44858)	File:1 , EH5_190409.raw , (SPC=45635)	File:1 , EH7_190409.raw , (SPC=44629)	File:1 , EH8_190409.raw , (SPC=47037)
7,13,
Protein Name	ApoE Sample-13(T-SPC= 43597)	ApoE Sample-14(T-SPC= 45131)	ApoE Sample-15(T-SPC= 43291)	ApoE Sample-16(T-SPC= 44431)	ApoE Sample-17(T-SPC= 45738)	ApoE Sample-18(T-SPC= 45018)	ApoE-H Sample-19(T-SPC= 45249)	ApoE-H Sample-20(T-SPC= 44984)	ApoE-H Sample-21(T-SPC= 44858)	ApoE-H Sample-22(T-SPC= 45635)	ApoE-H Sample-23(T-SPC= 44629)	ApoE-H Sample-24(T-SPC= 47037)	ApoE (Mean ± SD)	ApoE-H (Mean ± SD)	Fold ApoE vs ApoE-H	T-test ApoE vs ApoE-H	MW	Chain_Info	<Biological Process>	<Cellular Component>	<Molecular Function>
Alpha-1-antitrypsin 1-2 <sp|P22599|A1AT2_MOUSE>	291.473	305.111	313.988	295.967	323.327	340.3	298.444	330.715	304.994	293.009	290.685	348.285	311.694 ± 18.213	311.022 ± 23.276	-1.002	0.95673	45974.6	CHAIN 1-413	-->acute-phase response -->in utero embryonic development -->negative regulation of endopeptidase activity -->protein N-linked glycosylation -->regulation of proteolysis -->response to cytokine -->response to peptide hormone	-->extracellular region -->extracellular space	-->serine-type endopeptidase inhibitor activity
Alpha-1-antitrypsin 1-1 <sp|P07758|A1AT1_MOUSE>	313.816	317.865	324.216	329.849	346.56	347.185	312.144	329.731	312.89	299.801	285.725	349.226	329.915 ± 14.228	314.919 ± 22.312	-1.048	0.200455	46002.6	CHAIN 1-413	-->acute-phase response -->negative regulation of endopeptidase activity -->protein N-linked glycosylation -->regulation of proteolysis -->response to cytokine -->response to peptide hormone	-->extracellular region -->extracellular space	-->serine-type endopeptidase inhibitor activity
Alpha-1-antitrypsin 1-4 <sp|Q00897|A1AT4_MOUSE>	300.613	311.979	335.466	303.939	339.784	354.07	299.423	331.699	303.02	297.861	291.677	347.344	324.308 ± 21.809	311.837 ± 22.311	-1.04	0.350624	45998.4	CHAIN 1-413	-->negative regulation of endopeptidase activity -->regulation of proteolysis -->response to cytokine -->response to peptide hormone	-->extracellular region -->extracellular space	-->serine-type endopeptidase inhibitor activity
Alpha-1-antitrypsin 1-5 <sp|Q00898|A1AT5_MOUSE>	247.803	213.872	259.782	261.089	261.372	274.404	197.658	197.838	179.64	195.986	251.993	256.978	253.054 ± 20.965	213.349 ± 32.623	-1.186	0.0347712	45891.4	CHAIN 1-413	-->negative regulation of endopeptidase activity -->response to cytokine -->response to peptide hormone	-->endoplasmic reticulum -->extracellular space -->extracellular vesicular exosome -->Golgi apparatus	-->glycoprotein binding -->identical protein binding -->protease binding -->serine-type endopeptidase inhibitor activity
Haptoglobin <sp|Q61646|HPT_MOUSE>	20.3117	4.90532	21.478	4.98261	13.5526	33.4399	112.528	108.27	109.561	71.797	135.918	167.553	16.445 ± 10.973	117.604 ± 31.957	7.151	0.000290253	38752.3	CHAIN 1-347	-->acute-phase response -->defense response to bacterium -->immune system process -->liver development -->organ regeneration -->response to cobalamin -->response to drug -->response to glucocorticoid -->response to heat -->response to hypoxia -->response to L-ascorbic acid -->response to lead ion -->response to lipopolysaccharide -->response to magnesium ion -->response to X-ray	-->endoplasmic reticulum -->extracellular space -->Golgi apparatus	-->antioxidant activity -->serine-type endopeptidase activity
Complement C3 <sp|P01027|CO3_MOUSE>	345.299	327.676	325.239	326.859	299.126	333.416	291.595	314.967	327.696	471.532	270.843	284.276	326.269 ± 15.188	326.818 ± 73.847	1.002	0.986405	186484	CHAIN 1-1663	-->complement activation -->complement activation, alternative pathway -->complement activation, classical pathway -->fatty acid metabolic process -->inflammatory response -->positive regulation of activation of membrane attack complex -->positive regulation of angiogenesis -->positive regulation of apoptotic cell clearance -->positive regulation of glucose transport -->positive regulation of G-p…	-->blood microparticle -->extracellular vesicular exosome	-->C5L2 anaphylatoxin chemotactic receptor binding -->endopeptidase inhibitor activity
Murinoglobulin-1 <sp|P28665|MUG1_MOUSE>	294.519	270.774	265.918	269.061	297.19	298.009	302.358	330.715	344.475	230.915	221.238	271.097	282.578 ± 15.452	283.467 ± 51.183	1.003	0.968887	165298	CHAIN 1-1476	-->embryo implantation	-->extracellular space	-->serine-type endopeptidase inhibitor activity
Hemoglobin subunit beta-1 <sp|P02088|HBB1_MOUSE>	187.883	213.872	145.232	158.447	182.96	201.623	146.776	165.357	171.744	159.118	102.186	129.901	181.67 ± 25.855	145.847 ± 26.034	-1.246	0.0378624	15840.2	CHAIN 1-147	-	-->hemoglobin complex	-->heme binding -->iron ion binding -->oxygen binding -->oxygen transporter activity
Inter-alpha-trypsin inhibitor heavy chain H1 <sp|Q61702|ITIH1_MOUSE>	71.0909	68.6745	59.3203	71.7495	68.7312	67.8634	69.474	78.7417	76.9888	68.8863	76.3917	72.4809	67.905 ± 4.47	73.827 ± 4.145	1.087	0.038766	101067	CHAIN 1-907	-->hyaluronan metabolic process	-->blood microparticle -->extracellular vesicular exosome	-->serine-type endopeptidase inhibitor activity
Ig gamma-2A chain C region secreted form <sp|P01864|GCAB_MOUSE>	17.2649	42.1858	29.6601	31.8887	64.859	30.4893	82.1945	44.2922	60.2092	0	65.4786	67.7744	36.058 ± 16.184	53.325 ± 28.853	1.479	0.23752			-	-	-
Fibrinogen alpha chain <sp|E9PV24|FIBA_MOUSE>	154.369	139.311	143.187	156.454	144.239	151.463	178.088	149.609	152.003	140.683	182.546	170.377	148.17 ± 6.88	162.218 ± 17.081	1.095	0.106567	87429.3	CHAIN 1-789	-->blood coagulation -->blood coagulation, common pathway -->cell-matrix adhesion -->negative regulation of endothelial cell apoptotic process -->negative regulation of extrinsic apoptotic signaling pathway via death domain receptors -->platelet aggregation -->positive regulation of ERK1 and ERK2 cascade -->positive regulation of exocytosis -->positive regulation of heterotypic cell-cell adhesion…	-->blood microparticle -->cell cortex -->external side of plasma membrane -->extracellular vesicular exosome -->fibrinogen complex -->platelet alpha granule	-->structural molecule activity
Alpha-2-HS-glycoprotein <sp|P29699|FETUA_MOUSE>	131.01	119.69	136.027	111.61	127.782	124.908	118.399	117.128	115.483	125.16	104.171	117.664	125.171 ± 8.635	116.334 ± 6.83	-1.076	0.0791552	37325.6	CHAIN 1-345	-->acute-phase response -->negative regulation of bone mineralization -->ossification -->positive regulation of phagocytosis -->regulation of inflammatory response	-->blood microparticle -->extracellular vesicular exosome	-->cysteine-type endopeptidase inhibitor activity
Plasminogen <sp|P20918|PLMN_MOUSE>	150.306	157.951	158.528	155.457	158.759	147.529	163.411	154.531	161.874	129.041	141.87	153.434	154.755 ± 4.754	150.693 ± 13.082	-1.027	0.500317	90807.9	CHAIN 1-812	-->blood coagulation -->fibrinolysis -->labyrinthine layer blood vessel development -->mononuclear cell migration -->muscle cell cellular homeostasis -->myoblast differentiation -->negative regulation of angiogenesis -->proteolysis involved in cellular protein catabolic process -->tissue regeneration -->tissue remodeling -->trophoblast giant cell differentiation	-->extracellular region -->extracellular space -->extrinsic component of plasma membrane -->intracellular membrane-bounded organelle -->plasma lipoprotein particle	-->serine-type endopeptidase activity
Complement C4-B <sp|P01029|CO4B_MOUSE>	60.9351	44.1479	45.0016	50.8226	39.6898	60.9787	72.4095	63.9776	70.0795	129.041	64.4865	66.8331	50.263 ± 9.01	77.804 ± 25.309	1.548	0.0442917	192915	CHAIN 1-1738	-->complement activation, classical pathway -->inflammatory response -->innate immune response	-->extracellular space	-->endopeptidase inhibitor activity
Fibrinogen beta chain <sp|Q8K0E8|FIBB_MOUSE>	276.239	243.304	241.372	240.162	241.043	243.915	281.81	260.832	274.396	245.468	320.448	305.926	247.672 ± 14.066	281.48 ± 27.891	1.137	0.0313279	54752.7	CHAIN 1-481	-->cell-matrix adhesion -->cellular response to interleukin-1 -->cellular response to leptin stimulus -->negative regulation of endothelial cell apoptotic process -->negative regulation of extrinsic apoptotic signaling pathway via death domain receptors -->platelet aggregation -->positive regulation of ERK1 and ERK2 cascade -->positive regulation of exocytosis -->positive regulation of heterotypi…	-->blood microparticle -->cell cortex -->external side of plasma membrane -->extracellular vesicular exosome -->fibrinogen complex -->platelet alpha granule	-->structural molecule activity
Apolipoprotein A-IV <sp|P06728|APOA4_MOUSE>	189.914	182.478	206.598	165.423	208.13	182.936	275.939	252.958	230.966	245.468	222.23	251.33	189.246 ± 16.195	246.482 ± 18.778	1.302	0.000228779	45029	CHAIN 1-395	-->cholesterol efflux -->cholesterol homeostasis -->cholesterol metabolic process -->hydrogen peroxide catabolic process -->innate immune response in mucosa -->leukocyte cell-cell adhesion -->lipoprotein metabolic process -->multicellular organismal lipid catabolic process -->negative regulation of plasma lipoprotein particle oxidation -->phosphatidylcholine metabolic process -->phospholipid effl…	-->blood microparticle -->cell surface -->chylomicron -->cytosol -->extracellular region -->extracellular space -->extracellular vesicular exosome -->high-density lipoprotein particle -->very-low-density lipoprotein particle	-->antioxidant activity -->cholesterol transporter activity -->copper ion binding -->phosphatidylcholine binding -->phosphatidylcholine-sterol O-acyltransferase activator activity
Serine protease inhibitor A3K <sp|P07759|SPA3K_MOUSE>	259.99	237.418	270.009	282.015	295.254	298.009	263.218	260.832	267.487	217.331	241.08	274.863	273.782 ± 22.99	254.135 ± 21.261	-1.077	0.15552	46879.9	CHAIN 1-418	-->negative regulation of endopeptidase activity -->regulation of proteolysis -->response to cytokine -->response to peptide hormone	-->extracellular region -->extracellular space	-->serine-type endopeptidase inhibitor activity
Serine protease inhibitor A3M <sp|Q03734|SPA3M_MOUSE>	104.605	97.1254	116.595	105.631	111.325	117.04	104.7	103.348	102.652	79.5588	92.2653	108.251	108.72 ± 7.732	98.463 ± 10.695	-1.104	0.0889488	47064.2	CHAIN 1-418	-->negative regulation of endopeptidase activity -->regulation of proteolysis -->response to cytokine -->response to peptide hormone	-->extracellular region -->extracellular space	-->serine-type endopeptidase inhibitor activity
Fibronectin <sp|P11276|FINC_MOUSE>	174.681	155.989	171.824	179.374	171.344	194.738	231.906	224.414	220.109	185.314	211.317	253.213	174.658 ± 12.594	221.045 ± 22.522	1.266	0.00238464	272538	CHAIN 1-2477	-->acute-phase response -->angiogenesis -->calcium-independent cell-matrix adhesion -->cell adhesion -->cell-matrix adhesion -->cell-substrate junction assembly -->peptide cross-linking -->positive regulation of axon extension -->positive regulation of peptidase activity -->regulation of cell shape -->substrate adhesion-dependent cell spreading -->wound healing	-->apical plasma membrane -->basal lamina -->basement membrane -->blood microparticle -->endoplasmic reticulum-Golgi intermediate compartment -->extracellular matrix -->extracellular vesicular exosome -->fibrinogen complex -->proteinaceous extracellular matrix	-->heparin binding -->peptidase activator activity
Complement factor H <sp|P06909|CFAH_MOUSE>	153.353	140.292	148.301	158.447	136.494	148.513	182.002	163.389	161.874	165.909	178.578	184.497	147.567 ± 8.109	172.708 ± 10.102	1.17	0.000880311	139138	CHAIN 1-1234	-->complement activation, alternative pathway -->regulation of complement activation	-->extracellular region	-->complement component C3b binding -->heparin binding
Serum amyloid P-component <sp|P12246|SAMP_MOUSE>	0	0	0	0	0	0	2.93552	0	1.97407	1.94046	11.9052	7.53049	0 ± 0	4.381 ± 4.462	100	0.0612575	26247	CHAIN 1-224	-->innate immune response -->negative regulation of exo-alpha-sialidase activity -->negative regulation of glycoprotein metabolic process -->negative regulation of monocyte differentiation -->negative regulation of viral entry into host cell -->protein complex assembly	-->blood microparticle -->extracellular matrix -->extracellular vesicular exosome -->nucleus -->protein complex	-->calcium ion binding -->carbohydrate binding -->virion binding
Complement component C8 alpha chain <sp|Q8K182|CO8A_MOUSE>	41.639	36.2994	42.956	33.8817	40.6579	40.3246	42.0758	36.418	34.5462	29.1069	40.6761	40.4764	39.293 ± 3.467	37.217 ± 4.894	-1.056	0.418326	66080.3	CHAIN 1-587	-->complement activation -->complement activation, alternative pathway -->complement activation, classical pathway -->cytolysis	-->blood microparticle -->extracellular vesicular exosome -->membrane attack complex	-
Serine protease inhibitor A3N <sp|Q91WP6|SPA3N_MOUSE>	56.8727	51.0154	53.1837	53.8121	60.0188	56.0611	61.6459	48.2293	52.3129	47.5413	51.5892	64.0091	55.161 ± 3.17	54.221 ± 6.957	-1.017	0.772208	46718	CHAIN 1-418	-->acute-phase response -->negative regulation of endopeptidase activity -->response to cytokine -->response to peptide hormone	-->blood microparticle -->extracellular region -->extracellular space -->extracellular vesicular exosome	-->serine-type endopeptidase inhibitor activity
Ceruloplasmin <sp|Q61147|CERU_MOUSE>	154.369	149.122	156.483	157.45	151.015	151.463	193.744	194.886	205.303	226.064	186.515	197.675	153.317 ± 3.303	200.698 ± 13.835	1.309	0.00026619	121151	CHAIN 1-1061	-->cellular iron ion homeostasis -->copper ion transport	-->blood microparticle -->extracellular space -->extracellular vesicular exosome -->lysosomal membrane	-->copper ion binding -->ferroxidase activity
Albumin <sp|P07724|ALBU_MOUSE>	2611.07	2614.54	2696	2705.56	2605.01	2612.25	2199.68	2415.4	2634.4	2621.56	2120.12	2257.26	2640.737 ± 46.713	2374.737 ± 218.757	-1.112	0.0300334	68692.5	CHAIN 1-608	-->cellular response to starvation -->hemolysis by symbiont of host erythrocytes -->maintenance of mitochondrion location -->negative regulation of apoptotic process -->positive regulation of circadian sleep/wake cycle, non-REM sleep -->response to mercury ion -->response to nutrient -->response to organic substance -->response to platinum ion -->retina homeostasis -->transport	-->basement membrane -->blood microparticle -->cytoplasm -->extracellular region -->extracellular space -->extracellular vesicular exosome -->nucleus -->protein complex	-->DNA binding -->drug binding -->fatty acid binding -->oxygen binding -->pyridoxal phosphate binding -->toxic substance binding -->zinc ion binding
Phosphatidylinositol-glycan-specific phospholipase D <sp|O70362|PHLD_MOUSE>	37.5766	34.3373	32.7284	34.8782	37.7537	38.3576	41.0973	46.2607	43.4296	26.1962	22.8183	35.7698	35.939 ± 2.273	35.929 ± 9.554	-1	0.998097	93255.3	CHAIN 1-837	-->cell migration involved in sprouting angiogenesis -->cellular response to calcium ion -->cellular response to cholesterol -->cellular response to drug -->cellular response to insulin stimulus -->cellular response to pH -->cellular response to triglyceride -->chondrocyte differentiation -->complement receptor mediated signaling pathway -->GPI anchor release -->insulin receptor signaling pathway…	-->cytoplasm -->extracellular exosome -->extracellular region -->extracellular space -->high-density lipoprotein particle -->intracellular -->intracellular membrane-bounded organelle -->lysosomal membrane -->proteinaceous extracellular matrix	-->glycosylphosphatidylinositol phospholipase D activity -->phospholipase D activity -->sodium channel regulator activity
Pregnancy zone protein <sp|Q61838|PZP_MOUSE>	306.706	293.338	255.691	284.009	294.286	306.861	305.294	325.794	312.89	308.533	269.851	256.978	290.148 ± 19.004	296.557 ± 26.911	1.022	0.645107	165853	CHAIN 1-1495	-->embryo implantation -->negative regulation of endopeptidase activity	-->extracellular region -->extracellular space	-->endopeptidase inhibitor activity -->serine-type endopeptidase inhibitor activity
Inter alpha-trypsin inhibitor, heavy chain 4 <sp|A6X935|ITIH4_MOUSE>	68.0442	60.826	64.4341	67.7634	63.891	60.9787	95.8936	77.7574	84.885	86.3504	103.178	116.723	64.323 ± 3.14	94.131 ± 14.209	1.463	0.00311286	104660	CHAIN 1-942	-->acute-phase response -->hyaluronan metabolic process -->response to cytokine	-->blood microparticle -->cytoplasm -->extracellular vesicular exosome -->plasma membrane	-->serine-type endopeptidase inhibitor activity
Histidine-rich glycoprotein <sp|Q9ESB3|HRG_MOUSE>	50.7792	51.9964	58.2975	45.84	45.4981	44.2587	48.9253	53.1506	55.274	48.5115	41.6682	49.8895	49.445 ± 5.332	49.57 ± 4.678	1.003	0.966472	59162.8	CHAIN 1-525	-->angiogenesis -->chemotaxis -->defense response to fungus -->fibrinolysis -->heme export -->heme transport -->negative regulation of angiogenesis -->negative regulation of blood vessel endothelial cell migration -->negative regulation of cell adhesion -->negative regulation of cell adhesion mediated by integrin -->negative regulation of cell growth -->negative regulation of cell proliferation -…	-->blood microparticle -->endolysosome -->extracellular vesicular exosome -->phagolysosome membrane -->vesicle	-->cysteine-type endopeptidase inhibitor activity -->heme binding -->heparan sulfate proteoglycan binding -->heparin binding -->immunoglobulin binding -->metal ion binding -->receptor binding -->serine-type endopeptidase inhibitor activity -->zinc ion binding
Ig lambda-2 chain C region <sp|P01844|LAC2_MOUSE>	9.14026	11.7728	9.20487	13.9513	9.68045	12.7859	10.7636	10.827	15.7926	0	5.9526	14.1197	11.089 ± 2.043	9.576 ± 5.781	-1.158	0.566805	11254.5	CHAIN 1-104	-->B cell receptor signaling pathway -->complement activation, classical pathway -->defense response to bacterium -->innate immune response -->phagocytosis, engulfment -->phagocytosis, recognition -->positive regulation of B cell activation	-->blood microparticle -->external side of plasma membrane -->immunoglobulin complex, circulating -->plasma membrane	-->antigen binding -->immunoglobulin receptor binding
Ig lambda-3 chain C region <sp|P01845|LAC3_MOUSE>	8.12468	5.88639	6.13658	7.97217	6.77631	7.86822	5.87104	6.88989	10.8574	0	2.9763	8.4718	7.127 ± 0.99	5.844 ± 3.886	-1.22	0.464836	11370.6	CHAIN 1-104	-->B cell receptor signaling pathway -->complement activation, classical pathway -->defense response to bacterium -->innate immune response -->phagocytosis, engulfment -->phagocytosis, recognition -->positive regulation of B cell activation	-->blood microparticle -->immunoglobulin complex, circulating -->external side of plasma membrane -->plasma membrane	-->antigen binding -->immunoglobulin receptor binding
Inter-alpha-trypsin inhibitor heavy chain H3 <sp|Q61704|ITIH3_MOUSE>	37.5766	38.2615	37.8422	38.8643	44.5301	40.3246	58.7104	60.0405	60.2092	62.0947	73.4154	78.1288	39.567 ± 2.621	65.433 ± 8.217	1.654	0.000323852	99357.8	CHAIN 1-889	-->hyaluronan metabolic process	-->extracellular region	-->serine-type endopeptidase inhibitor activity
Gelsolin <sp|P13020|GELS_MOUSE>	88.3558	92.2201	95.117	98.6556	87.124	86.5504	86.1086	91.5372	100.678	96.0527	98.2179	109.192	91.337 ± 4.862	96.964 ± 7.912	1.062	0.174665	85941.6	CHAIN 1-780	-->actin filament capping -->actin filament polymerization -->actin filament severing -->aging -->apoptotic process -->cellular response to cadmium ion -->cilium morphogenesis -->oligodendrocyte development -->phosphatidylinositol-mediated signaling -->regulation of cell adhesion -->response to ethanol -->response to folic acid -->tissue regeneration -->vesicle-mediated transport	-->actin cytoskeleton -->blood microparticle -->cytosol -->extracellular region -->extracellular vesicular exosome -->lamellipodium -->perinuclear region of cytoplasm -->protein complex -->ruffle	-->metal ion binding
Coagulation factor XII <sp|Q80YC5|FA12_MOUSE>	20.3117	18.6402	22.5008	21.9235	25.1692	20.6541	18.5916	23.6225	22.7018	22.3153	22.8183	28.2393	21.533 ± 2.234	23.048 ± 3.093	1.07	0.355927	65701.3	CHAIN 1-597	-->blood coagulation -->Factor XII activation -->fibrinolysis -->plasma kallikrein-kinin cascade -->positive regulation of blood coagulation -->positive regulation of fibrinolysis -->positive regulation of plasminogen activation -->protein autoprocessing -->protein processing -->regulation of blood coagulation -->response to misfolded protein -->zymogen activation	-->extracellular space -->extracellular vesicular exosome	-->peptidase activity -->serine-type aminopeptidase activity -->serine-type endopeptidase activity
Ig kappa chain V-III region PC 2880/PC 1229 <sp|P01654|KV3A1_MOUSE>	9.14026	8.82958	7.15934	8.96869	10.6485	6.88469	8.80656	10.827	7.89628	0	12.8973	8.4718	8.605 ± 1.392	8.15 ± 4.398	-1.056	0.817019	11980.4	CHAIN 1-111	-	-	-->antigen binding
Ig kappa chain V-III region 50S10.1 <sp|P03977|KV3A4_MOUSE>	9.14026	9.81065	5.11382	8.96869	8.7124	4.91764	6.84954	10.827	6.90925	0	10.9131	7.53049	7.777 ± 2.171	7.172 ± 3.977	-1.084	0.752025	12042.4	CHAIN 1-111	-	-	-->antigen binding
Ig kappa chain V-III region PC 6308 <sp|P01667|KV3AF_MOUSE>	3.04675	3.92426	3.06829	7.97217	6.77631	2.95058	3.91403	6.88989	4.93518	0	5.9526	4.70655	4.623 ± 2.193	4.4 ± 2.391	-1.051	0.869471	12071.2	CHAIN 1-111	-	-	-->antigen binding
Ig kappa chain V-III region PC 3741/TEPC 111 <sp|P01660|KV3A8_MOUSE>	0	0	0	0	0	0	5.87104	6.88989	5.92221	0	10.9131	6.58918	0 ± 0	6.031 ± 3.501	100	0.00833405	12099.4	CHAIN 1-111	-	-	-->antigen binding
Vitamin D-binding protein <sp|P21614|VTDB_MOUSE>	97.4961	101.05	111.481	103.638	91.9643	112.122	115.464	130.908	129.302	113.517	90.2811	126.136	102.959 ± 7.892	117.601 ± 15.195	1.142	0.071736	53600.3	CHAIN 1-476	-->vitamin D metabolic process	-->blood microparticle -->extracellular vesicular exosome	-->actin binding -->calcidiol binding -->vitamin transporter activity
Serotransferrin <sp|Q921I1|TRFE_MOUSE>	701.769	690.67	759.913	677.634	709.577	690.436	689.847	743.124	772.849	785.886	679.589	683.392	705 ± 29.028	725.781 ± 47.646	1.029	0.387417	76723.8	CHAIN 1-697	-->actin filament organization -->activation of JUN kinase activity -->cellular iron ion homeostasis -->ERK1 and ERK2 cascade -->iron ion transport -->osteoclast differentiation -->positive regulation of bone resorption -->positive regulation of cell motility -->positive regulation of phosphorylation -->positive regulation of transcription, DNA-templated -->SMAD protein signal transduction	-->coated pit -->dense body -->early endosome -->endocytic vesicle -->endosome -->extracellular region -->recycling endosome -->vesicle coat	-->ferric iron binding
Zinc-alpha-2-glycoprotein <sp|Q64726|ZA2G_MOUSE>	38.5922	32.3751	37.8422	38.8643	35.8177	40.3246	32.2907	40.3551	44.4166	32.0176	37.6998	40.4764	37.303 ± 2.829	37.876 ± 4.924	1.015	0.810925	35331.9	CHAIN 1-307	-->antigen processing and presentation of peptide antigen via MHC class I -->cell adhesion -->detection of chemical stimulus involved in sensory perception of bitter taste -->immune response -->positive regulation of T cell mediated cytotoxicity -->regulation of multicellular organism growth -->retina homeostasis	-->extracellular space -->extracellular vesicular exosome -->MHC class I protein complex -->nucleus	-->peptide antigen binding
Carboxylesterase 1C <sp|P23953|EST1C_MOUSE>	141.166	150.103	128.868	131.541	125.846	125.891	116.442	123.034	118.444	117.398	90.2811	95.0724	133.903 ± 9.749	110.112 ± 13.777	-1.216	0.00723784	61055.8	CHAIN 1-554	-->metabolic process	-->endoplasmic reticulum -->extracellular space	-->carboxylic ester hydrolase activity -->hydrolase activity, acting on ester bonds
Ig gamma-2B chain C region <sp|P01867|IGG2B_MOUSE>	34.5299	43.1668	26.5918	44.8435	60.0188	37.374	52.8393	28.5439	45.4036	0	57.5418	39.5351	41.087 ± 11.347	37.311 ± 20.928	-1.101	0.708074	44259.4	CHAIN 1-404	-->B cell receptor signaling pathway -->complement activation, classical pathway -->defense response to bacterium -->humoral immune response mediated by circulating immunoglobulin -->immunoglobulin mediated immune response -->innate immune response -->phagocytosis, engulfment -->phagocytosis, recognition -->positive regulation of B cell activation -->positive regulation of immune response -->posi…	-->blood microparticle -->external side of plasma membrane -->extracellular space -->immunoglobulin complex, circulating -->integral component of membrane	-->antigen binding -->immunoglobulin receptor binding
Retinol-binding protein 4 <sp|Q00724|RET4_MOUSE>	23.3584	22.5645	24.5463	24.913	24.2011	21.6376	24.4627	25.591	24.6759	16.4939	10.9131	28.2393	23.537 ± 1.26	21.729 ± 6.601	-1.083	0.537218	23206.1	CHAIN 1-201	-->cardiac muscle tissue development -->detection of light stimulus involved in visual perception -->embryonic organ morphogenesis -->embryonic retina morphogenesis in camera-type eye -->embryonic skeletal system development -->eye development -->female genitalia morphogenesis -->gluconeogenesis -->glucose homeostasis -->heart development -->heart trabecula formation -->lung development -->mainte…	-->extracellular space -->extracellular vesicular exosome	-->retinal binding -->retinol binding -->retinol transporter activity
Lumican <sp|P51885|LUM_MOUSE>	13.2026	16.6781	18.4097	13.9513	14.5207	12.7859	19.5701	13.7798	13.8185	13.5832	15.8736	15.061	14.925 ± 2.185	15.281 ± 2.283	1.024	0.788054	38265	CHAIN 1-338	-->cartilage development -->collagen fibril organization -->positive regulation of transcription from RNA polymerase II promoter -->response to growth factor -->response to organic cyclic compound -->visual perception	-->extracellular space -->extracellular vesicular exosome -->fibrillar collagen trimer -->proteinaceous extracellular matrix	-
Coagulation factor V <sp|O88783|FA5_MOUSE>	20.3117	20.6024	20.4553	17.9374	13.5526	24.5882	30.3337	42.3236	27.637	19.4046	25.7946	29.1806	19.575 ± 3.646	29.112 ± 7.529	1.487	0.0259673	247230	CHAIN 1-2183	-->blood circulation -->blood coagulation -->platelet activation	-->endoplasmic reticulum -->extracellular space -->Golgi apparatus -->membrane -->platelet alpha granule -->vesicle	-->copper ion binding -->serine-type endopeptidase activity
Vitronectin <sp|P29788|VTNC_MOUSE>	36.561	35.3183	37.8422	36.8713	36.7857	41.3081	33.2692	38.3866	37.5073	32.0176	34.7235	31.0633	37.448 ± 2.057	34.495 ± 2.956	-1.086	0.0757468	54849	CHAIN 1-478	-->cell adhesion mediated by integrin -->cell-matrix adhesion -->extracellular matrix organization -->immune response -->negative regulation of endopeptidase activity -->positive regulation of cell-substrate adhesion -->positive regulation of peptidyl-tyrosine phosphorylation -->positive regulation of protein binding -->positive regulation of receptor-mediated endocytosis -->positive regulation o…	-->blood microparticle -->extracellular vesicular exosome -->proteinaceous extracellular matrix	-->extracellular matrix binding -->heparin binding -->polysaccharide binding -->scavenger receptor activity
Serum amyloid A-2 protein <sp|P05367|SAA2_MOUSE>	0	0	0	0	0	0	2.93552	1.96854	6.90925	2.91069	25.7946	32.0046	0 ± 0	12.087 ± 13.28	100	0.0762105	13622.2	CHAIN 1-122	-->acute-phase response -->cell chemotaxis -->response to stilbenoid	-->cytoplasmic microtubule -->extracellular exosome -->extracellular space -->high-density lipoprotein particle	-->chemoattractant activity -->G-protein coupled receptor binding
Serum amyloid A-4 protein <sp|P31532|SAA4_MOUSE>	15.2338	12.7538	10.2276	13.9513	16.4568	17.7035	19.5701	21.654	21.7148	13.5832	17.8578	18.8262	14.388 ± 2.689	18.868 ± 3.01	1.311	0.0218442	15087.9	CHAIN 1-130	-->acute-phase response -->cell chemotaxis	-->Extracellular region or secreted Cytosol Plasma membrane Cytoskeleton Lysosome Endosome Peroxisome ER Golgi apparatus Nucleus Mitochondrion Manual annotation Automatic computational assertionGraphics by Christian Stolte; -->extracellular space -->high-density lipoprotein particle	-->chemoattractant activity
Corticosteroid-binding globulin <sp|Q06770|CBG_MOUSE>	22.3429	25.5077	16.3642	21.9235	18.3929	19.6705	14.6776	20.6697	14.8055	23.2855	16.8657	19.7675	20.7 ± 3.24	18.345 ± 3.464	-1.128	0.251974	44769.2	CHAIN 1-397	-->glucocorticoid metabolic process -->negative regulation of endopeptidase activity -->regulation of proteolysis -->transport	-->extracellular space -->extracellular vesicular exosome	-->serine-type endopeptidase inhibitor activity -->steroid binding
Hemoglobin subunit alpha <sp|P01942|HBA_MOUSE>	158.431	180.516	126.823	131.541	158.759	153.43	112.528	132.877	129.302	150.386	90.2811	113.899	151.583 ± 19.767	121.545 ± 20.676	-1.247	0.0278267	15085.2	CHAIN 1-142	-->response to stilbenoid	-->hemoglobin complex	-->heme binding -->iron ion binding -->oxygen binding -->oxygen transporter activity
Afamin <sp|O89020|AFAM_MOUSE>	48.7481	48.0722	38.865	44.8435	48.4022	43.2752	44.0328	42.3236	43.4296	39.7794	41.6682	35.7698	45.368 ± 3.87	41.167 ± 3.032	-1.102	0.0644122	69379.1	CHAIN 1-608	-->vitamin transport	-->blood microparticle -->extracellular space -->extracellular vesicular exosome	-->vitamin E binding
Carboxypeptidase N subunit 2 <sp|Q9DBB9|CPN2_MOUSE>	11.1714	11.7728	12.2732	10.9617	10.6485	11.8023	7.82805	8.85844	14.8055	9.7023	6.9447	5.64786	11.438 ± 0.61	8.964 ± 3.195	-1.276	0.117567	60479.2	CHAIN 1-547	-	-->blood microparticle -->extracellular vesicular exosome	-
Complement factor D <sp|P03953|CFAD_MOUSE>	22.3429	25.5077	25.5691	23.9165	22.265	22.6211	17.6131	13.7798	18.7537	20.3748	11.9052	14.1197	23.704 ± 1.541	16.091 ± 3.302	-1.473	0.00132559	28056.8	CHAIN 1-259	-->complement activation, alternative pathway	-->extracellular space -->extracellular vesicular exosome	-->serine-type endopeptidase activity
Complement component C9 <sp|P06683|CO9_MOUSE>	31.4831	33.3562	38.865	28.8991	28.0733	35.407	41.0973	36.418	34.5462	33.958	39.684	32.9459	32.681 ± 4.077	36.442 ± 3.291	1.115	0.11056	62002.3	CHAIN 1-548	-->cell killing -->complement activation, alternative pathway -->complement activation, classical pathway -->cytolysis -->protein homooligomerization	-->blood microparticle -->cytosol -->extracellular exosome -->extracellular space -->membrane attack complex -->other organism cell membrane -->plasma membrane	-
Fibrinogen gamma chain <sp|Q8VCM7|FIBG_MOUSE>	198.039	176.592	156.483	176.384	176.184	181.953	213.314	210.634	188.524	195.986	235.128	225.915	177.606 ± 13.32	211.583 ± 17.542	1.191	0.00408733	49391.4	CHAIN 1-436	-->cell-matrix adhesion -->negative regulation of endothelial cell apoptotic process -->negative regulation of extrinsic apoptotic signaling pathway via death domain receptors -->platelet aggregation -->positive regulation of ERK1 and ERK2 cascade -->positive regulation of exocytosis -->positive regulation of heterotypic cell-cell adhesion -->positive regulation of peptide hormone secretion -->po…	-->blood microparticle -->cell cortex -->external side of plasma membrane -->extracellular vesicular exosome -->fibrinogen complex -->platelet alpha granule	-->metal ion binding -->structural molecule activity
Ig heavy chain V region 3-6 <sp|P18531|HVM60_MOUSE>	1.01558	3.92426	2.04553	3.98608	3.87218	2.95058	6.84954	3.93708	6.90925	0	5.9526	4.70655	2.966 ± 1.219	4.726 ± 2.598	1.593	0.176068			-	-	-
Ig kappa chain V-VI region NQ2-6.1 <sp|P04945|KV6AB_MOUSE>	1.01558	6.86745	4.09105	1.99304	2.90413	3.93411	3.91403	0.984271	3.94814	0	3.9684	2.82393	3.468 ± 2.033	2.606 ± 1.723	-1.331	0.447495	11713.3	CHAIN 1-108	-->immune response -->immunoglobulin production	-->extracellular space	-->antigen binding
Ig kappa chain V-VI region XRPC 44 <sp|P01675|KV6A1_MOUSE>	5.07792	5.88639	4.09105	1.99304	4.84022	2.95058	2.93552	3.93708	2.96111	0	5.9526	4.70655	4.14 ± 1.445	3.415 ± 2.024	-1.212	0.49354	11627.1	CHAIN 1-107	-	-	-->antigen binding
Ig kappa chain V-VI region J539 <sp|P01679|KV6A5_MOUSE>	0	0	0	0	0	0	0.978506	0.984271	0.987035	0	1.9842	1.88262	0 ± 0	1.136 ± 0.726	100	0.0122265	11502	CHAIN 1-107	-	-	-->antigen binding
Ig gamma-2A chain C region, membrane-bound form <sp|P01865|GCAM_MOUSE>	7.10909	12.7538	12.2732	12.9548	23.2331	10.8188	19.5701	16.7326	14.8055	0	22.8183	18.8262	13.19 ± 5.377	15.459 ± 8.043	1.172	0.580252	43949.2	CHAIN 1-398	-->antibody-dependent cellular cytotoxicity -->antigen processing and presentation -->B cell receptor signaling pathway -->complement activation, classical pathway -->defense response to bacterium -->early endosome to late endosome transport -->endosome to lysosome transport -->humoral immune response mediated by circulating immunoglobulin -->immunoglobulin mediated immune response -->innate immu…	-->Extracellular region or secreted Cytosol Plasma membrane Cytoskeleton Lysosome Endosome Peroxisome ER Golgi apparatus Nucleus Mitochondrion Manual annotation Automatic computational assertionGraphics by Christian Stolte; -->cytosol -->multivesicular body -->blood microparticle -->immunoglobulin complex, circulating -->external side of plasma membrane -->integral component of membrane	-->antigen binding -->immunoglobulin receptor binding
Ig gamma-2A chain C region, A allele <sp|P01863|GCAA_MOUSE>	7.10909	12.7538	12.2732	12.9548	23.2331	10.8188	19.5701	16.7326	14.8055	0	22.8183	18.8262	13.19 ± 5.377	15.459 ± 8.043	1.172	0.580252	36389.4	CHAIN 1-330	-->B cell receptor signaling pathway -->complement activation, classical pathway -->defense response to bacterium -->innate immune response -->phagocytosis, engulfment -->phagocytosis, recognition -->positive regulation of B cell activation	-->Extracellular region or secreted Cytosol Plasma membrane Cytoskeleton Lysosome Endosome Peroxisome ER Golgi apparatus Nucleus Mitochondrion Manual annotation Automatic computational assertionGraphics by Christian Stolte; -->blood microparticle -->immunoglobulin complex, circulating -->external side of plasma membrane	-->antigen binding -->immunoglobulin receptor binding
Clusterin <sp|Q06890|CLUS_MOUSE>	35.5455	36.2994	36.8195	38.8643	33.8816	40.3246	54.7964	45.2765	44.4166	45.6008	41.6682	42.359	36.956 ± 2.319	45.686 ± 4.733	1.236	0.00445566	51655.6	CHAIN 1-448	-->cell morphogenesis -->central nervous system myelin maintenance -->chaperone-mediated protein complex assembly -->chaperone-mediated protein folding -->intrinsic apoptotic signaling pathway -->microglial cell activation -->microglial cell proliferation -->negative regulation of beta-amyloid formation -->negative regulation of intrinsic apoptotic signaling pathway in response to DNA damage -->n…	-->apical dendrite -->blood microparticle -->chromaffin granule -->cytoplasm -->cytosol -->endoplasmic reticulum -->extracellular matrix -->extracellular space -->extracellular vesicular exosome -->mitochondrial membrane -->neurofibrillary tangle -->nucleus -->perinuclear region of cytoplasm -->spherical high-density lipoprotein particle	-->misfolded protein binding -->ubiquitin protein ligase binding
Ig gamma-3 chain C region <sp|P03987|IGHG3_MOUSE>	37.5766	52.9775	38.865	44.8435	36.7857	33.4399	18.5916	45.2765	49.3518	0	32.7393	41.4177	40.748 ± 7.058	31.229 ± 18.798	-1.305	0.287148	43929.1	CHAIN 1-398	-	-->Extracellular region or secreted Cytosol Plasma membrane Cytoskeleton Lysosome Endosome Peroxisome ER Golgi apparatus Nucleus Mitochondrion Manual annotation Automatic computational assertionGraphics by Christian Stolte; -->extracellular region -->plasma membrane -->integral component of membrane	-->antigen binding -->immunoglobulin receptor binding
H-2 class I histocompatibility antigen, Q10 alpha chain <sp|P01898|HA10_MOUSE>	40.6234	44.1479	38.865	40.8574	39.6898	46.2258	34.2477	45.2765	40.4685	37.839	33.7314	46.1242	41.735 ± 2.843	39.615 ± 5.324	-1.054	0.4157	37251	CHAIN 1-325	-->antigen processing and presentation of peptide antigen via MHC class I -->immune response -->positive regulation of T cell mediated cytotoxicity	-->integral component of lumenal side of endoplasmic reticulum membrane -->MHC class I protein complex -->phagocytic vesicle membrane	-->peptide antigen binding
H-2 class I histocompatibility antigen, Q8 alpha chain <sp|P14430|HA18_MOUSE>	6.09351	4.90532	5.11382	6.97565	5.80827	6.88469	5.87104	7.87417	6.90925	5.82138	3.9684	9.41311	5.964 ± 0.867	6.643 ± 1.881	1.114	0.447939	37410.6	CHAIN 1-326	-->antigen processing and presentation of exogenous peptide antigen via MHC class I, TAP-dependent -->antigen processing and presentation of peptide antigen via MHC class I -->immune response	-->integral component of lumenal side of endoplasmic reticulum membrane -->MHC class I protein complex -->phagocytic vesicle membrane -->plasma membrane	-->peptide antigen binding -->receptor binding
Ig heavy chain V region AC38 205.12 <sp|P06330|HVM51_MOUSE>	14.2182	19.6213	16.3642	20.9269	20.3289	16.72	24.4627	20.6697	24.6759	0	19.842	26.3567	18.03 ± 2.654	19.334 ± 9.798	1.072	0.764065	12934.3	CHAIN 1-118	-	-	-->antigen binding
Ig kappa chain V-II region VKappa167 <sp|P01627|KV2A2_MOUSE>	2.03117	4.90532	1.02276	3.98608	5.80827	0	1.95701	1.96854	2.96111	0	1.9842	1.88262	2.959 ± 2.295	1.792 ± 0.968	-1.651	0.290338	13280.1	CHAIN 1-120	-->immune response -->immunoglobulin production	-->extracellular space	-->antigen binding
Apolipoprotein B-100 <sp|E9Q414|APOB_MOUSE>	74.1377	79.4662	64.4341	108.621	79.3797	82.6163	66.5384	79.7259	84.885	90.2314	91.2732	111.075	81.442 ± 14.771	87.288 ± 14.723	1.072	0.507953	509432	CHAIN 1-4505	-->artery morphogenesis -->cellular response to prostaglandin stimulus -->cellular response to tumor necrosis factor -->cholesterol efflux -->cholesterol homeostasis -->cholesterol metabolic process -->cholesterol transport -->fertilization -->in utero embryonic development -->lipid catabolic process -->lipid metabolic process -->lipoprotein biosynthetic process -->lipoprotein catabolic process -…	-->actin cytoskeleton -->chylomicron -->cytoplasm -->endoplasmic reticulum -->extracellular region -->extracellular vesicular exosome -->Golgi apparatus -->intermediate-density lipoprotein particle -->low-density lipoprotein particle -->mature chylomicron -->plasma membrane -->very-low-density lipoprotein particle -->vesicle lumen -->vesicle membrane	-->cholesterol transporter activity -->heparin binding -->lipase binding -->low-density lipoprotein particle receptor binding -->phospholipid binding
Prothrombin <sp|P19221|THRB_MOUSE>	101.558	97.1254	104.322	97.6591	97.7725	98.3527	117.421	109.254	119.431	93.1421	91.2732	106.368	99.465 ± 2.857	106.148 ± 11.863	1.067	0.231748	70268.7	CHAIN 1-618	-->acute-phase response -->cytosolic calcium ion homeostasis -->fibrinolysis -->negative regulation of astrocyte differentiation -->negative regulation of proteolysis -->platelet activation -->positive regulation of blood coagulation -->positive regulation of cell growth -->positive regulation of cell proliferation -->positive regulation of collagen biosynthetic process -->positive regulation of …	-->blood microparticle -->extracellular vesicular exosome	-->calcium ion binding -->peptidase activity -->serine-type endopeptidase activity -->thrombospondin receptor activity
Secreted phosphoprotein 24 <sp|Q8K1I3|SPP24_MOUSE>	5.07792	4.90532	5.11382	4.98261	5.80827	5.90116	7.82805	5.90562	5.92221	2.91069	1.9842	5.64786	5.298 ± 0.438	5.033 ± 2.17	-1.053	0.780211	23136.1	CHAIN 1-203	-->bone remodeling	-->extracellular exosome	-
Major urinary protein 1 <sp|P11588|MUP1_MOUSE>	32.4987	31.3941	37.8422	31.8887	38.7218	45.2423	41.0973	42.3236	33.5592	19.4046	32.7393	40.4764	36.265 ± 5.407	34.933 ± 8.616	-1.038	0.756361	20648.5	CHAIN 1-180	-->aerobic respiration -->cellular response to food -->cellular response to lipid -->cellular response to starvation -->cellular response to testosterone stimulus -->energy reserve metabolic process -->glucose homeostasis -->heat generation -->insulin receptor signaling pathway -->locomotor rhythm -->mitochondrion morphogenesis -->negative regulation of gluconeogenesis -->negative regulation of i…	-->cytosol -->extracellular space -->nucleus	-->insulin-activated receptor activity -->pheromone binding -->small molecule binding -->transporter activity
Major urinary protein 17 <sp|B5X0G2|MUP17_MOUSE>	27.4208	25.5077	34.7739	27.9026	32.9135	43.2752	37.1832	36.418	26.65	16.4939	27.7788	38.5937	31.966 ± 6.566	30.52 ± 8.528	-1.047	0.749301	20638.4	CHAIN 1-180	-	-->extracellular region	-->pheromone binding -->small molecule binding -->transporter activity
Major urinary protein 2 <sp|P11589|MUP2_MOUSE>	30.4675	31.3941	35.7967	30.8922	36.7857	44.2587	38.1617	39.3708	34.5462	19.4046	29.763	36.7111	34.932 ± 5.29	32.993 ± 7.466	-1.059	0.616129	20663.5	CHAIN 1-180	-->aerobic respiration -->cellular response to lipid -->energy reserve metabolic process -->glucose homeostasis -->heat generation -->insulin receptor signaling pathway -->locomotor rhythm -->mitochondrion morphogenesis -->negative regulation of gluconeogenesis -->negative regulation of insulin secretion involved in cellular response to glucose stimulus -->negative regulation of lipid biosyntheti…	-->cytosol -->extracellular space -->nucleus	-->insulin-activated receptor activity -->pheromone binding -->small molecule binding -->transporter activity
Ig heavy chain V-III region J606 <sp|P01801|HVM32_MOUSE>	0	0	0	0	0	0	13.6991	13.7798	12.8315	0	8.9289	14.1197	0 ± 0	10.56 ± 5.518	100	0.00539552	12810.3	CHAIN 1-115	-	-	-->antigen binding
Coagulation factor X <sp|O88947|FA10_MOUSE>	20.3117	20.6024	17.387	19.9304	17.4248	24.5882	22.5056	25.591	18.7537	15.5237	16.8657	16.0023	20.041 ± 2.644	19.207 ± 4.029	-1.043	0.6821	54018	CHAIN 1-481	-->blood coagulation -->positive regulation of protein kinase B signaling	-->Extracellular region or secreted Cytosol Plasma membrane Cytoskeleton Lysosome Endosome Peroxisome ER Golgi apparatus Nucleus Mitochondrion Manual annotation Automatic computational assertionGraphics by Christian Stolte; -->extracellular region	-->calcium ion binding -->phospholipid binding -->serine-type endopeptidase activity
Plasma kallikrein <sp|P26262|KLKB1_MOUSE>	54.8416	55.9207	56.252	62.7808	53.2425	59.0116	52.8393	51.1821	54.2869	36.8687	32.7393	39.5351	57.008 ± 3.405	44.575 ± 9.286	-1.279	0.0202889	71382.6	CHAIN 1-638	-->blood coagulation -->fibrinolysis -->inflammatory response -->plasminogen activation -->positive regulation of fibrinolysis	-->extracellular space -->extracellular vesicular exosome	-->serine-type endopeptidase activity
Antithrombin-III <sp|P32261|ANT3_MOUSE>	69.0597	64.7503	72.6162	64.7739	72.6034	80.6492	68.4954	63.9776	71.0665	65.9756	47.6208	59.3026	70.742 ± 5.991	62.74 ± 8.425	-1.128	0.0903467	52003.6	CHAIN 1-465	-->blood coagulation -->negative regulation of endopeptidase activity -->negative regulation of inflammatory response -->regulation of blood coagulation, intrinsic pathway -->regulation of proteolysis -->response to nutrient	-->blood microparticle -->extracellular region -->extracellular vesicular exosome	-->heparin binding -->serine-type endopeptidase inhibitor activity
Carboxypeptidase N catalytic chain <sp|Q9JJN5|CBPN_MOUSE>	20.3117	15.697	17.387	14.9478	19.3609	22.6211	14.6776	17.7169	19.7407	17.4641	10.9131	15.061	18.388 ± 2.92	15.929 ± 3.084	-1.154	0.186706	51845.4	CHAIN 1-457	-->bradykinin catabolic process -->insulin processing -->response to glucocorticoid	-->extracellular space -->Golgi apparatus -->synaptic membrane -->neuronal cell body -->secretory granule	-->carboxypeptidase activity -->metallocarboxypeptidase activity -->serine-type carboxypeptidase activity -->zinc ion binding
Mannose-binding protein C <sp|P41317|MBL2_MOUSE>	12.187	13.7349	12.2732	10.9617	10.6485	11.8023	14.6776	14.7641	17.7666	18.4344	9.921	11.2957	11.935 ± 1.099	14.477 ± 3.391	1.213	0.13093	25957.1	CHAIN 1-244	-->complement activation, classical pathway -->complement activation, lectin pathway -->defense response to Gram-positive bacterium -->killing by host of symbiont cells -->negative regulation of growth of symbiont in host -->negative regulation of viral process -->positive regulation of phagocytosis	-->collagen trimer -->extracellular space	-->mannose binding
Fetuin-B <sp|Q9QXC1|FETUB_MOUSE>	51.7948	56.9018	58.2975	50.8226	51.3064	48.1928	44.0328	44.2922	51.3258	40.7496	30.7551	35.7698	52.886 ± 3.883	41.154 ± 7.196	-1.285	0.00843308	42712.8	CHAIN 1-388	-->binding of sperm to zona pellucida -->negative regulation of endopeptidase activity -->single fertilization	-->extracellular region -->extracellular space	-->cysteine-type endopeptidase inhibitor activity -->metalloendopeptidase inhibitor activity
Immunoglobulin kappa constant <sp|P01837|IGKC_MOUSE>	50.7792	64.7503	56.252	67.7634	62.9229	55.0775	84.1515	65.9461	69.0925	0	81.3522	81.894	59.591 ± 6.537	63.739 ± 32.102	1.07	0.768013	11777.9	CHAIN 1-106	-->B cell differentiation -->B cell receptor signaling pathway -->complement activation, classical pathway -->defense response to bacterium -->innate immune response -->phagocytosis, engulfment -->phagocytosis, recognition -->positive regulation of B cell activation	-->blood microparticle -->external side of plasma membrane -->immunoglobulin complex, circulating -->plasma membrane	-->antigen binding -->immunoglobulin receptor binding
Ig kappa chain V-V region MOPC 173 <sp|P01643|KV5AA_MOUSE>	6.09351	7.84852	7.15934	4.98261	9.68045	7.86822	6.84954	6.88989	6.90925	0	7.9368	4.70655	7.272 ± 1.621	5.549 ± 2.917	-1.311	0.242233			-	-	-
Hemopexin <sp|Q91X72|HEMO_MOUSE>	144.213	130.482	173.87	85.7008	113.261	144.579	215.271	169.295	192.472	170.76	200.404	121.429	132.017 ± 30.191	178.272 ± 32.95	1.35	0.0297642	51317.8	CHAIN 1-460	-->heme metabolic process -->hemoglobin metabolic process -->positive regulation of humoral immune response mediated by circulating immunoglobulin -->positive regulation of immunoglobulin production -->positive regulation of interferon-gamma-mediated signaling pathway -->positive regulation of response to interferon-gamma -->positive regulation of tyrosine phosphorylation of Stat1 protein -->regu…	-->blood microparticle -->extracellular vesicular exosome	-->metal ion binding
Inhibitor of carbonic anhydrase <sp|Q9DBD0|ICA_MOUSE>	85.3091	90.258	94.0942	91.68	90.9962	84.5834	93.9366	98.4271	95.7424	74.7077	71.4312	91.3071	89.487 ± 3.753	87.592 ± 11.533	-1.022	0.715048	76765.7	CHAIN 1-700	-->cellular iron ion homeostasis -->iron ion transport	-->extracellular region	-->enzyme inhibitor activity
Alpha-1-acid glycoprotein 1 <sp|Q60590|A1AG1_MOUSE>	28.4364	23.5456	31.7057	25.9096	27.1053	24.5882	32.2907	32.4809	22.7018	32.0176	38.6919	45.1829	26.882 ± 2.935	33.894 ± 7.534	1.261	0.0743836	23895.3	CHAIN 1-207	-->acute-phase response -->regulation of immune system process -->transport	-->extracellular space	-
Immunoglobulin heavy constant mu <sp|P01872|IGHM_MOUSE>	22.3429	36.2994	31.7057	27.9026	45.4981	24.5882	81.216	57.0877	45.4036	0.97023	74.4075	55.5373	31.389 ± 8.527	52.437 ± 28.427	1.671	0.133934	49972	CHAIN 1-454	-->activation of MAPK activity -->antigen processing and presentation -->B cell receptor signaling pathway -->defense response to Gram-negative bacterium -->early endosome to late endosome transport -->humoral immune response mediated by circulating immunoglobulin -->immunoglobulin mediated immune response -->positive regulation of B cell activation -->positive regulation of B cell proliferation …	-->B cell receptor complex -->external side of plasma membrane -->extracellular space -->immunoglobulin complex, circulating -->integral component of membrane -->perinuclear region of cytoplasm -->plasma membrane	-->antigen binding -->transmembrane signaling receptor activity
Leukemia inhibitory factor receptor <sp|P42703|LIFR_MOUSE>	19.2961	24.5266	22.5008	19.9304	22.265	23.6047	11.7421	13.7798	13.8185	5.82138	10.9131	10.3544	22.021 ± 2.043	11.072 ± 2.947	-1.989	4.00302e-05	122574	CHAIN 1-1092	-->positive regulation of cell proliferation	-->extracellular region -->integral component of membrane -->plasma membrane	-->leukemia inhibitory factor receptor activity -->oncostatin-M receptor activity
Prenylcysteine oxidase <sp|Q9CQF9|PCYOX_MOUSE>	1.01558	0.981065	3.06829	0.996521	1.93609	1.96705	5.87104	4.92135	3.94814	3.88092	3.9684	0.941311	1.661 ± 0.833	3.922 ± 1.654	2.361	0.01901	56494.7	CHAIN 1-505	-->prenylated protein catabolic process -->prenylcysteine catabolic process	-->extracellular exosome -->lysosome -->plasma membrane -->vacuolar membrane -->very-low-density lipoprotein particle	-->chloride-transporting ATPase activity -->prenylcysteine oxidase activity
Apolipoprotein A-I <sp|Q00623|APOA1_MOUSE>	172.649	171.686	187.166	164.426	176.184	207.524	252.455	208.665	198.394	195.016	195.444	204.264	179.939 ± 15.422	209.04 ± 21.921	1.162	0.0261254	30615.5	CHAIN 1-264	-->adrenal gland development -->blood vessel endothelial cell migration -->cholesterol biosynthetic process -->cholesterol efflux -->cholesterol homeostasis -->cholesterol import -->cholesterol metabolic process -->cholesterol transport -->endothelial cell proliferation -->glucocorticoid metabolic process -->G-protein coupled receptor signaling pathway -->high-density lipoprotein particle assembl…	-->blood microparticle -->cytosol -->endocytic vesicle -->extracellular region -->extracellular space -->extracellular vesicular exosome -->nucleus -->spherical high-density lipoprotein particle -->very-low-density lipoprotein particle	-->beta-amyloid binding -->cholesterol binding -->cholesterol transporter activity -->high-density lipoprotein particle binding -->identical protein binding -->lipase inhibitor activity -->lipid binding -->lipid transporter activity -->lipoprotein particle binding -->phosphatidylcholine-sterol O-acyltransferase activator activity -->phospholipid binding -->phospholipid transporter activity
Napsin-A <sp|O09043|NAPSA_MOUSE>	1.01558	1.96213	1.02276	2.98956	2.90413	1.96705	2.93552	2.95281	2.96111	0.97023	3.9684	1.88262	1.977 ± 0.863	2.612 ± 1.04	1.321	0.27744			-	-	-
Inter-alpha-trypsin inhibitor heavy chain H2 <sp|Q61703|ITIH2_MOUSE>	49.7636	51.9964	57.2747	47.833	51.3064	50.1599	48.9253	52.1663	49.3518	60.1542	52.5813	48.9482	51.389 ± 3.219	52.021 ± 4.304	1.012	0.779616	105928	CHAIN 1-946	-->hyaluronan metabolic process	-->blood microparticle -->extracellular vesicular exosome	-->serine-type endopeptidase inhibitor activity
Complement C5 <sp|P06684|CO5_MOUSE>	50.7792	45.129	49.0926	43.8469	39.6898	54.094	61.6459	61.0248	42.4425	65.9756	60.5181	48.9482	47.105 ± 5.212	56.759 ± 9.024	1.205	0.0529412	188878	CHAIN 1-1680	-->cellular calcium ion homeostasis -->chemotaxis -->complement activation, alternative pathway -->complement activation, classical pathway -->cytolysis -->glucose homeostasis -->in utero embryonic development -->leukocyte migration involved in inflammatory response -->negative regulation of dopamine secretion -->negative regulation of macrophage chemotaxis -->negative regulation of norepinephrin…	-->extracellular space -->extracellular vesicular exosome -->membrane attack complex	-->endopeptidase inhibitor activity
Complement C1s-A subcomponent <sp|Q8CG14|CS1A_MOUSE>	17.2649	17.6592	17.387	22.92	15.4887	22.6211	21.5271	23.6225	25.6629	9.7023	16.8657	20.7088	18.89 ± 3.103	19.682 ± 5.715	1.042	0.773489	76857.6	CHAIN 1-688	-->complement activation, classical pathway -->complement activation, lectin pathway	-->Extracellular region or secreted Cytosol Plasma membrane Cytoskeleton Lysosome Endosome Peroxisome ER Golgi apparatus Nucleus Mitochondrion Manual annotation Automatic computational assertionGraphics by Christian Stolte; -->extracellular space	-->calcium ion binding -->identical protein binding -->serine-type endopeptidase activity
Complement C1s-B subcomponent <sp|Q8CFG8|CS1B_MOUSE>	0	0	0	0	0	0	12.7206	12.7955	12.8315	5.82138	8.9289	11.2957	0 ± 0	10.732 ± 2.839	100	0.000246947	76700.2	CHAIN 1-688	-->complement activation, classical pathway -->complement activation, lectin pathway	-->Extracellular region or secreted Cytosol Plasma membrane Cytoskeleton Lysosome Endosome Peroxisome ER Golgi apparatus Nucleus Mitochondrion Manual annotation Automatic computational assertionGraphics by Christian Stolte; -->extracellular space	-->calcium ion binding -->identical protein binding -->serine-type endopeptidase activity
Complement factor B <sp|P04186|CFAB_MOUSE>	78.2	79.4662	74.6617	77.7287	69.6992	83.5998	90.0226	92.5214	103.639	97.9932	94.2495	87.5419	77.226 ± 4.692	94.328 ± 5.796	1.221	0.00025977	85004.5	CHAIN 1-761	-->cell proliferation -->complement activation, alternative pathway	-->extracellular region	-->serine-type endopeptidase activity
Kininogen-1 <sp|O08677|KNG1_MOUSE>	137.104	136.368	144.21	133.534	141.335	133.76	130.141	126.971	137.198	117.398	111.115	127.077	137.718 ± 4.257	124.983 ± 9.317	-1.102	0.0187031	73102.1	CHAIN 1-661	-->blood coagulation -->inflammatory response -->vasodilation	-->extracellular region	-->cysteine-type endopeptidase inhibitor activity
Apolipoprotein C-II <sp|Q05020|APOC2_MOUSE>	12.187	12.7538	11.2504	16.9409	13.5526	13.7694	24.4627	30.5124	22.7018	21.3451	21.8262	29.1806	13.409 ± 1.96	25.005 ± 3.921	1.865	0.000276666	10741.3	CHAIN 1-97	-->cholesterol efflux -->chylomicron remnant clearance -->high-density lipoprotein particle clearance -->lipid catabolic process -->negative regulation of cholesterol transport -->negative regulation of lipid metabolic process -->negative regulation of receptor-mediated endocytosis -->negative regulation of very-low-density lipoprotein particle clearance -->phospholipid efflux -->positive regulat…	-->cytosol -->chylomicron -->extracellular exosome -->extracellular region -->extracellular space -->intermediate-density lipoprotein particle -->low-density lipoprotein particle -->spherical high-density lipoprotein particle -->very-low-density lipoprotein particle	-->lipase inhibitor activity -->lipid binding -->lipoprotein lipase activator activity -->phospholipase activator activity -->phospholipase binding -->protein homodimerization activity
Macrophage colony-stimulating factor 1 receptor <sp|P09581|CSF1R_MOUSE>	3.04675	4.90532	3.06829	7.97217	7.74436	3.93411	3.91403	4.92135	3.94814	2.91069	3.9684	4.70655	5.112 ± 2.235	4.062 ± 0.71	-1.258	0.314744	109179	CHAIN 1-977	-->axon guidance -->cell-cell junction maintenance -->cell proliferation -->cellular response to cytokine stimulus -->cellular response to macrophage colony-stimulating factor stimulus -->cytokine-mediated signaling pathway -->forebrain neuron differentiation -->hemopoiesis -->inflammatory response -->innate immune response -->macrophage colony-stimulating factor signaling pathway -->negative reg…	-->nucleoplasm -->plasma membrane -->cell surface -->CSF1-CSF1R complex -->integral component of membrane -->intracellular membrane-bounded organelle -->membrane	-->ATP binding -->cytokine binding -->macrophage colony-stimulating factor receptor activity -->protein homodimerization activity -->protein phosphatase binding -->transmembrane receptor protein tyrosine kinase activity
Ig kappa chain V-V region MOPC 41 <sp|P01639|KV5A7_MOUSE>	4.06234	3.92426	5.11382	1.99304	4.84022	3.93411	4.89253	8.85844	13.8185	0	8.9289	5.64786	3.978 ± 1.094	7.024 ± 4.668	1.766	0.174573	14311.1	CHAIN 1-130	-->immune response -->immunoglobulin production	-->extracellular space	-->antigen binding
Beta-2-glycoprotein 1 <sp|Q01339|APOH_MOUSE>	79.2156	82.4094	80.7983	81.7147	81.3158	72.781	79.259	79.7259	89.8202	65.0054	64.4865	66.8331	79.706 ± 3.559	74.188 ± 10.327	-1.074	0.261	38618.8	CHAIN 1-345	-->blood coagulation, intrinsic pathway -->negative regulation of angiogenesis -->negative regulation of blood coagulation -->negative regulation of endothelial cell migration -->negative regulation of endothelial cell proliferation -->negative regulation of fibrinolysis -->negative regulation of myeloid cell apoptotic process -->negative regulation of smooth muscle cell apoptotic process -->plas…	-->cell surface -->chylomicron -->extracellular matrix -->extracellular space -->extracellular vesicular exosome -->high-density lipoprotein particle -->very-low-density lipoprotein particle	-->glycoprotein binding -->heparin binding -->identical protein binding -->lipid binding -->lipoprotein lipase activator activity -->phospholipid binding
Peroxiredoxin-2 <sp|Q61171|PRDX2_MOUSE>	6.09351	5.88639	4.09105	4.98261	2.90413	4.91764	3.91403	1.96854	3.94814	5.82138	1.9842	4.70655	4.813 ± 1.183	3.724 ± 1.52	-1.292	0.19813	21778.7	CHAIN 1-198	-->activation of MAPK activity -->homeostasis of number of cells -->hydrogen peroxide catabolic process -->hydrogen peroxide metabolic process -->negative regulation of extrinsic apoptotic signaling pathway -->negative regulation of extrinsic apoptotic signaling pathway in absence of ligand -->negative regulation of lipopolysaccharide-mediated signaling pathway -->negative regulation of NF-kappaB…	-->mitochondrion	-->peroxidase activity -->selenium binding -->thioredoxin peroxidase activity
Platelet glycoprotein Ib alpha chain <sp|O35930|GP1BA_MOUSE>	6.09351	10.7917	6.13658	5.97913	6.77631	6.88469	12.7206	10.827	8.88332	9.7023	6.9447	5.64786	7.11 ± 1.843	9.121 ± 2.571	1.283	0.153697	80055.4	CHAIN 1-734	-->blood coagulation -->cell adhesion -->cell morphogenesis -->fibrinolysis -->hemostasis	-->anchored component of external side of plasma membrane -->integral component of plasma membrane	-
Immunoglobulin J chain <sp|P01592|IGJ_MOUSE>	10.1558	8.82958	12.2732	13.9513	8.7124	7.86822	12.7206	10.827	9.87035	0	16.8657	9.41311	10.298 ± 2.36	9.949 ± 5.578	-1.035	0.891894	18013.5	CHAIN 1-159	-->adaptive immune response -->antibacterial humoral response -->glomerular filtration -->humoral immune response -->innate immune response -->positive regulation of protein oligomerization -->positive regulation of respiratory burst -->retina homeostasis	-->blood microparticle -->dimeric IgA immunoglobulin complex -->extracellular exosome -->extracellular space -->monomeric IgA immunoglobulin complex -->pentameric IgM immunoglobulin complex -->secretory dimeric IgA immunoglobulin complex -->secretory IgA immunoglobulin complex	-->antigen binding -->IgA binding -->immunoglobulin receptor binding -->peptidoglycan binding -->phosphatidylcholine binding -->protein binding, bridging -->protein homodimerization activity -->single-stranded DNA binding
Cathepsin B <sp|P10605|CATB_MOUSE>	9.14026	7.84852	7.15934	5.97913	7.74436	7.86822	11.7421	10.827	11.8444	7.76184	7.9368	13.1784	7.623 ± 1.034	10.548 ± 2.222	1.384	0.0219824	37279.8	CHAIN 1-339	-->cellular response to thyroid hormone stimulus -->collagen catabolic process -->decidualization -->epithelial cell differentiation -->proteolysis involved in cellular protein catabolic process -->regulation of catalytic activity	-->extracellular vesicular exosome -->lysosome -->mitochondrion -->nucleolus -->perinuclear region of cytoplasm	-->cysteine-type endopeptidase activity
Alpha-1-acid glycoprotein 2 <sp|P07361|A1AG2_MOUSE>	21.3273	15.697	22.5008	19.9304	19.3609	17.7035	23.4842	22.6382	17.7666	23.2855	33.7314	37.6524	19.42 ± 2.458	26.426 ± 7.58	1.361	0.0744066	23843.4	CHAIN 1-207	-->acute-phase response -->regulation of immune system process -->transport	-->extracellular space	-
Complement factor I <sp|Q61129|CFAI_MOUSE>	35.5455	27.4698	27.6146	36.8713	30.0094	30.4893	34.2477	26.5753	27.637	28.1367	26.7867	28.2393	31.333 ± 3.991	28.604 ± 2.848	-1.095	0.205638	67260.5	CHAIN 1-603	-->complement activation, classical pathway -->innate immune response	-->extracellular space -->extracellular vesicular exosome -->membrane -->nucleus	-->metal ion binding -->scavenger receptor activity -->serine-type endopeptidase activity
Ig gamma-1 chain C region, membrane-bound form <sp|P01869|IGH1M_MOUSE>	23.3584	23.5456	15.3414	24.913	19.3609	23.6047	14.6776	14.7641	16.7796	0	13.8894	16.9436	21.687 ± 3.633	12.842 ± 6.409	-1.689	0.0189177	43386.5	CHAIN 1-393	-	-->integral component of membrane -->plasma membrane	-->antigen binding
Ig gamma-1 chain C region secreted form <sp|P01868|IGHG1_MOUSE>	0	0	0	0	0	0	14.6776	14.7641	16.7796	0	13.8894	16.9436	0 ± 0	12.842 ± 6.409	100	0.00444369	35704.6	CHAIN 1-324	-	-->extracellular region	-->antigen binding
Complement C1q subcomponent subunit A <sp|P98086|C1QA_MOUSE>	6.09351	2.94319	3.06829	3.98608	1.93609	5.90116	3.91403	4.92135	5.92221	2.91069	4.9605	4.70655	3.988 ± 1.688	4.556 ± 1.03	1.142	0.501082	25974.4	CHAIN 1-245	-->complement activation, classical pathway -->innate immune response -->response to iron ion	-->extracellular exosome -->extracellular space -->collagen trimer	-
Ig kappa chain V-I region S107A <sp|P01632|KV1A1_MOUSE>	3.04675	2.94319	2.04553	2.98956	2.90413	1.96705	3.91403	2.95281	1.97407	0	2.9763	2.82393	2.649 ± 0.501	2.44 ± 1.345	-1.086	0.732596	12717.5	CHAIN 1-114	-->immune response -->immunoglobulin production	-->extracellular space	-->antigen binding
Ig heavy chain V region 108A <sp|P01758|HVM14_MOUSE>	5.07792	5.88639	6.13658	5.97913	7.74436	3.93411	8.80656	4.92135	4.93518	0	6.9447	10.3544	5.793 ± 1.26	5.994 ± 3.634	1.035	0.902385			-	-	-
Coagulation factor XIII B chain <sp|Q07968|F13B_MOUSE>	49.7636	38.2615	41.9333	31.8887	34.8496	40.3246	42.0758	32.4809	33.5592	26.1962	29.763	33.8872	39.504 ± 6.213	32.994 ± 5.301	-1.197	0.0801574	76195.4	CHAIN 1-669	-->blood coagulation	-->extracellular region	-
Fructose-bisphosphate aldolase B <sp|Q91Y97|ALDOB_MOUSE>	0	0	1.02276	0	0	0.983527	1.95701	9.84271	11.8444	15.5237	4.9605	11.2957	0.334 ± 0.518	9.237 ± 4.944	27.656	0.00675815	39507	CHAIN 1-364	-->fructose 1,6-bisphosphate metabolic process -->fructose metabolic process -->glycolytic process -->NADH oxidation -->positive regulation of ATPase activity -->vacuolar proton-transporting V-type ATPase complex assembly	-->centriolar satellite -->extracellular vesicular exosome	-->fructose binding -->fructose-bisphosphate aldolase activity
Serum amyloid A-1 protein <sp|P05366|SAA1_MOUSE>	1.01558	0.981065	2.04553	1.99304	0.968045	0.983527	7.82805	3.93708	6.90925	4.85115	24.8025	27.298	1.331 ± 0.534	12.604 ± 10.537	9.47	0.0470235	13770.3	CHAIN 1-122	-->acute-phase response -->cell chemotaxis -->cholesterol metabolic process	-->cytoplasmic microtubule -->extracellular exosome -->extracellular space -->high-density lipoprotein particle	-->chemoattractant activity -->G-protein coupled receptor binding -->heparin binding
Ig heavy chain V region 3 <sp|P01749|HVM05_MOUSE>	5.07792	7.84852	9.20487	8.96869	9.68045	7.86822	10.7636	6.88989	8.88332	0	6.9447	5.64786	8.108 ± 1.657	6.522 ± 3.666	-1.243	0.366343			-	-	-
Insulin-like growth factor-binding protein complex acid labile subunit <sp|P70389|ALS_MOUSE>	2.03117	7.84852	4.09105	3.98608	4.84022	6.88469	6.84954	5.90562	7.89628	1.94046	0.9921	2.82393	4.947 ± 2.114	4.401 ± 2.851	-1.124	0.715006	66960	CHAIN 1-603	-->cell adhesion	-->Extracellular region or secreted Cytosol Plasma membrane Cytoskeleton Lysosome Endosome Peroxisome ER Golgi apparatus Nucleus Mitochondrion Manual annotation Automatic computational assertionGraphics by Christian Stolte; -->insulin-like growth factor ternary complex -->nucleoplasm	-->insulin-like growth factor binding
Thyroxine-binding globulin <sp|P61939|THBG_MOUSE>	3.04675	4.90532	2.04553	5.97913	2.90413	3.93411	5.87104	10.827	7.89628	16.4939	4.9605	3.76524	3.802 ± 1.445	8.302 ± 4.718	2.184	0.0674443	47052.2	CHAIN 1-418	-->thyroid hormone transport	-->extracellular exosome -->extracellular space	-->serine-type endopeptidase inhibitor activity
C-C motif chemokine 8 <sp|Q9Z121|CCL8_MOUSE>	0	0	0	0	0	0	0.978506	0	0.987035	0	0	1.88262	0 ± 0	0.641 ± 0.776	100	0.0986771	11017.3	CHAIN 1-97	-->cellular response to interferon-gamma -->cellular response to interleukin-1 -->cellular response to tumor necrosis factor -->chemokine-mediated signaling pathway -->G-protein coupled receptor signaling pathway -->inflammatory response -->lymphocyte chemotaxis -->monocyte chemotaxis -->neutrophil chemotaxis -->positive regulation of ERK1 and ERK2 cascade -->positive regulation of GTPase activit…	-->extracellular space	-->CCR chemokine receptor binding -->chemokine activity -->heparin binding
Ig heavy chain V region VH558 A1/A4 <sp|P06327|HVM52_MOUSE>	0	0.981065	1.02276	2.98956	0.968045	0.983527	0.978506	0.984271	0.987035	0	1.9842	6.58918	1.157 ± 0.981	1.921 ± 2.372	1.66	0.491265			-	-	-
N-acetylmuramoyl-L-alanine amidase <sp|Q8VCS0|PGRP2_MOUSE>	15.2338	18.6402	18.4097	17.9374	20.3289	19.6705	20.5486	22.6382	23.6888	31.0474	28.7709	27.298	18.37 ± 1.768	25.665 ± 4.013	1.397	0.00491083	57706.8	CHAIN 1-530	-->defense response to Gram-positive bacterium -->detection of bacterium -->growth of symbiont in host -->negative regulation of interferon-gamma production -->negative regulation of natural killer cell differentiation involved in immune response -->peptidoglycan catabolic process -->regulation of inflammatory response	-->extracellular exosome -->membrane	-->N-acetylmuramoyl-L-alanine amidase activity -->peptidoglycan binding -->peptidoglycan receptor activity -->zinc ion binding
Phosphatidylcholine-sterol acyltransferase <sp|P16301|LCAT_MOUSE>	11.1714	12.7538	9.20487	12.9548	9.68045	14.7529	12.7206	12.7955	11.8444	8.73207	12.8973	13.1784	11.753 ± 2.125	12.028 ± 1.676	1.023	0.808735	49746.9	CHAIN 1-438	-->cholesterol esterification -->cholesterol homeostasis -->cholesterol metabolic process -->cholesterol transport -->high-density lipoprotein particle remodeling -->lipoprotein biosynthetic process -->phosphatidylcholine biosynthetic process -->phosphatidylcholine metabolic process -->phospholipid metabolic process -->regulation of high-density lipoprotein particle assembly -->reverse cholestero…	-->extracellular exosome -->extracellular space -->high-density lipoprotein particle	-->apolipoprotein A-I binding -->phosphatidylcholine-sterol O-acyltransferase activity
Ig heavy chain V region 36-65 <sp|P01747|HVM03_MOUSE>	3.04675	2.94319	4.09105	2.98956	6.77631	1.96705	4.89253	2.95281	2.96111	0	10.9131	9.41311	3.636 ± 1.679	5.189 ± 4.185	1.427	0.428538			-	-	-
Ig heavy chain V region 93G7 <sp|P01746|HVM02_MOUSE>	3.04675	2.94319	4.09105	2.98956	6.77631	1.96705	4.89253	2.95281	2.96111	0	10.9131	9.41311	3.636 ± 1.679	5.189 ± 4.185	1.427	0.428538			-	-	-
Serine protease inhibitor A3G <sp|Q5I2A0|SPA3G_MOUSE>	35.5455	29.4319	30.6829	29.8956	31.9455	30.4893	28.3767	23.6225	24.6759	24.2557	24.8025	21.6501	31.332 ± 2.233	24.564 ± 2.194	-1.276	0.000350427	49021.4	CHAIN 1-440	-->adaptive immune response -->apoptotic process -->negative regulation of endopeptidase activity -->response to cytokine -->response to peptide hormone	-->cytoplasm -->extracellular space -->nucleus	-->cysteine-type endopeptidase inhibitor activity -->serine-type endopeptidase inhibitor activity
Ig kappa chain V-V region MOPC 149 <sp|P01636|KV5A4_MOUSE>	1.01558	3.92426	2.04553	2.98956	4.84022	1.96705	2.93552	2.95281	2.96111	0	3.9684	2.82393	2.797 ± 1.408	2.607 ± 1.345	-1.073	0.81587	12030.4	CHAIN 1-108	-	-	-->antigen binding
Cathepsin S <sp|O70370|CATS_MOUSE>	0	0	2.04553	0	0.968045	1.96705	0.978506	1.96854	0.987035	2.91069	1.9842	3.76524	0.83 ± 0.986	2.099 ± 1.092	2.529	0.0609589	38474.5	CHAIN 1-340	-->antigen processing and presentation -->antigen processing and presentation of exogenous peptide antigen via MHC class I, TAP-independent -->antigen processing and presentation of peptide antigen -->basement membrane disassembly -->collagen catabolic process -->immune response -->positive regulation of cation channel activity -->positive regulation of inflammatory response -->protein processing…	-->early endosome lumen -->extracellular space -->intracellular membrane-bounded organelle -->lysosome -->membrane	-->collagen binding -->cysteine-type endopeptidase activity -->fibronectin binding -->laminin binding -->peptidase activity -->proteoglycan binding
Ig kappa chain V-II region 26-10 <sp|P01631|KV2A7_MOUSE>	10.1558	7.84852	9.20487	5.97913	8.7124	9.83527	7.82805	7.87417	9.87035	0	8.9289	5.64786	8.623 ± 1.533	6.692 ± 3.568	-1.289	0.263904	12272.8	CHAIN 1-113	-	-	-->antigen binding
Angiotensinogen <sp|P11859|ANGT_MOUSE>	12.187	15.697	11.2504	7.97217	10.6485	13.7694	9.78506	11.8112	12.8315	5.82138	7.9368	7.53049	11.921 ± 2.661	9.286 ± 2.687	-1.284	0.118727	51990.5	CHAIN 1-477	-->activation of NF-kappaB-inducing kinase activity -->angiotensin-mediated vasoconstriction involved in regulation of systemic arterial blood pressure -->astrocyte activation -->blood vessel development -->brain renin-angiotensin system -->branching involved in ureteric bud morphogenesis -->cell-matrix adhesion -->drinking behavior -->establishment of blood-nerve barrier -->excretion -->extracel…	-->Extracellular region or secreted Cytosol Plasma membrane Cytoskeleton Lysosome Endosome Peroxisome ER Golgi apparatus Nucleus Mitochondrion Manual annotation Automatic computational assertionGraphics by Christian Stolte; -->extracellular region -->extracellular space -->intracellular	-->serine-type endopeptidase inhibitor activity -->type 1 angiotensin receptor binding -->type 2 angiotensin receptor binding
Protein AMBP <sp|Q07456|AMBP_MOUSE>	22.3429	19.6213	15.3414	19.9304	18.3929	20.6541	22.5056	26.5753	24.6759	21.3451	19.842	24.4741	19.38 ± 2.368	23.236 ± 2.465	1.199	0.020061	39029.2	CHAIN 1-349	-->protein catabolic process -->protein-chromophore linkage -->protein maturation	-->blood microparticle -->cell surface -->extracellular vesicular exosome -->intracellular membrane-bounded organelle -->plasma membrane	-->heme binding -->IgA binding -->protein homodimerization activity -->serine-type endopeptidase inhibitor activity -->small molecule binding
Proteasome subunit alpha type-7 <sp|Q9Z2U0|PSA7_MOUSE>	0	0	0	0	0	0	2.93552	1.96854	1.97407	5.82138	4.9605	6.58918	0 ± 0	4.042 ± 2.015	100	0.00442273	27854.8	CHAIN 1-248	-->ubiquitin-dependent protein catabolic process	-->cytosol -->extracellular vesicular exosome -->nucleus -->proteasome core complex -->proteasome core complex, alpha-subunit complex	-->threonine-type endopeptidase activity
Epidermal growth factor receptor <sp|Q01279|EGFR_MOUSE>	25.3896	18.6402	24.5463	22.92	24.2011	28.5223	29.3552	27.5596	19.7407	18.4344	25.7946	28.2393	24.037 ± 3.244	24.854 ± 4.632	1.034	0.731494	134853	CHAIN 1-1210	-->activation of MAPKK activity -->alkanesulfonate metabolic process -->astrocyte activation -->cell morphogenesis -->cell proliferation -->cellular response to amino acid stimulus -->cellular response to dexamethasone stimulus -->cellular response to drug -->cellular response to estradiol stimulus -->cellular response to growth factor stimulus -->cellular response to mechanical stimulus -->cereb…	-->apical plasma membrane -->basolateral plasma membrane -->cell surface -->endocytic vesicle -->endoplasmic reticulum -->endosome -->Golgi apparatus -->integral component of membrane -->intracellular -->membrane raft -->nucleus -->perinuclear region of cytoplasm -->plasma membrane -->receptor complex	-->ATP binding -->chromatin binding -->epidermal growth factor-activated receptor activity -->kinase activity -->nitric-oxide synthase regulator activity -->protein tyrosine kinase activity -->receptor signaling protein tyrosine kinase activity -->signal transducer activity
Alpha-2-antiplasmin <sp|Q61247|A2AP_MOUSE>	20.3117	24.5266	23.5235	21.9235	21.297	21.6376	19.5701	21.654	20.7277	20.3748	20.8341	18.8262	22.203 ± 1.545	20.331 ± 1.001	-1.092	0.0356096	54971.9	CHAIN 1-491	-->acute-phase response -->blood vessel morphogenesis -->collagen fibril organization -->negative regulation of endopeptidase activity -->negative regulation of fibrinolysis -->negative regulation of plasminogen activation -->positive regulation of cell differentiation -->positive regulation of collagen biosynthetic process -->positive regulation of ERK1 and ERK2 cascade -->positive regulation of…	-->blood microparticle -->cell surface -->extracellular space -->extracellular vesicular exosome -->fibrinogen complex	-->serine-type endopeptidase inhibitor activity
Apolipoprotein M <sp|Q9Z1R3|APOM_MOUSE>	8.12468	8.82958	7.15934	6.97565	8.7124	8.85175	4.89253	3.93708	1.97407	1.94046	2.9763	2.82393	8.109 ± 0.851	3.091 ± 1.15	-2.623	1.07543e-05	21273.3	CHAIN 1-190	-->cholesterol efflux -->high-density lipoprotein particle assembly -->high-density lipoprotein particle clearance -->high-density lipoprotein particle remodeling -->lipoprotein metabolic process -->negative regulation of plasma lipoprotein particle oxidation -->response to glucose -->reverse cholesterol transport	-->discoidal high-density lipoprotein particle -->extracellular region -->extracellular vesicular exosome -->high-density lipoprotein particle -->low-density lipoprotein particle -->spherical high-density lipoprotein particle -->very-low-density lipoprotein particle	-->antioxidant activity -->lipid transporter activity -->phospholipid binding
CD5 antigen-like <sp|Q9QWK4|CD5L_MOUSE>	11.1714	15.697	19.4325	15.9443	23.2331	11.8023	41.0973	25.591	21.7148	6.79161	40.6761	24.4741	16.213 ± 4.579	26.724 ± 12.884	1.648	0.106817	38862.7	CHAIN 1-352	-->apoptotic process -->immune system process -->inflammatory response	-->blood microparticle -->extracellular exosome -->cytoplasm -->membrane	-->scavenger receptor activity
Protein Z-dependent protease inhibitor <sp|Q8R121|ZPI_MOUSE>	5.07792	3.92426	4.09105	5.97913	7.74436	9.83527	10.7636	8.85844	9.87035	16.4939	10.9131	16.9436	6.109 ± 2.302	12.307 ± 3.498	2.015	0.00590168	51797.4	CHAIN 1-448	-->blood coagulation -->negative regulation of endopeptidase activity -->regulation of proteolysis	-->extracellular space	-->heparin binding -->serine-type endopeptidase inhibitor activity
Complement component C8 beta chain <sp|Q8BH35|CO8B_MOUSE>	36.561	34.3373	35.7967	34.8782	31.9455	36.3905	26.4197	23.6225	18.7537	19.4046	36.7077	28.2393	34.985 ± 1.72	25.525 ± 6.636	-1.371	0.0161997	66229.3	CHAIN 1-589	-->complement activation, alternative pathway -->complement activation, classical pathway -->cytolysis	-->extracellular space -->membrane attack complex	-
Carbonic anhydrase 2 <sp|P00920|CAH2_MOUSE>	8.12468	8.82958	7.15934	3.98608	7.74436	9.83527	7.82805	8.85844	4.93518	11.6428	12.8973	6.58918	7.613 ± 2.003	8.792 ± 3.021	1.155	0.447011	29032.6	CHAIN 1-260	-->angiotensin-activated signaling pathway -->carbon dioxide transport -->kidney development -->morphogenesis of an epithelium -->odontogenesis of dentin-containing tooth -->one-carbon metabolic process -->positive regulation of bone resorption -->positive regulation of cellular pH reduction -->positive regulation of dipeptide transmembrane transport -->positive regulation of osteoclast different…	-->apical part of cell -->axon -->basolateral plasma membrane -->cytoplasm -->cytosol -->extracellular space -->extracellular vesicular exosome -->microvillus -->myelin sheath -->plasma membrane	-->carbonate dehydratase activity -->zinc ion binding
Biotinidase <sp|Q8CIF4|BTD_MOUSE>	2.03117	2.94319	3.06829	1.99304	1.93609	3.93411	1.95701	3.93708	2.96111	2.91069	1.9842	0.941311	2.651 ± 0.804	2.449 ± 1.041	-1.082	0.714652	58154.4	CHAIN 1-520	-->biotin metabolic process -->central nervous system development	-->Extracellular region or secreted Cytosol Plasma membrane Cytoskeleton Lysosome Endosome Peroxisome ER Golgi apparatus Nucleus Mitochondrion Manual annotation Automatic computational assertionGraphics by Christian Stolte; -->extracellular space -->nucleolus -->apical part of cell -->perikaryon	-->biotinidase activity
Cathelicidin antimicrobial peptide <sp|P51437|CAMP_MOUSE>	0	0	0	0	0	0	0.978506	0.984271	0.987035	0	0.9921	0.941311	0 ± 0	0.814 ± 0.399	100	0.00412305	19581.5	CHAIN 1-173	-->antibacterial humoral response -->cellular response to interleukin-1 -->cellular response to interleukin-6 -->cellular response to lipopolysaccharide -->cellular response to peptidoglycan -->cellular response to tumor necrosis factor -->defense response to Gram-negative bacterium -->defense response to Gram-positive bacterium -->innate immune response in mucosa -->killing by host of symbiont c…	-->cell projection -->extracellular space -->extracellular vesicular exosome -->specific granule	-
Ig kappa chain V-II region 17S29.1 <sp|P03976|KV2A5_MOUSE>	8.12468	5.88639	6.13658	2.98956	3.87218	4.91764	8.80656	7.87417	7.89628	0	8.9289	4.70655	5.321 ± 1.819	6.369 ± 3.476	1.197	0.532506	12390	CHAIN 1-113	-	-	-->antigen binding
C-reactive protein <sp|P14847|CRP_MOUSE>	10.1558	11.7728	11.2504	7.97217	10.6485	12.7859	13.6991	13.7798	15.7926	13.5832	14.8815	13.1784	10.764 ± 1.644	14.152 ± 0.984	1.315	0.00238511	25360	CHAIN 1-225	-->acute-phase response -->aging -->cellular response to calcium ion -->complement activation, classical pathway -->negative regulation of lipid storage -->negative regulation of macrophage derived foam cell differentiation -->positive regulation of dendrite development -->protein polymerization -->regulation of interleukin-8 secretion -->response to ethanol -->response to hypoxia -->response to …	-->extracellular space -->extracellular vesicular exosome -->filopodium -->growth cone	-->calcium ion binding -->cholesterol binding -->low-density lipoprotein particle binding
Serine protease inhibitor A3F <sp|Q80X76|SPA3F_MOUSE>	28.4364	27.4698	25.5691	27.9026	23.2331	24.5882	25.4412	22.6382	19.7407	20.3748	21.8262	21.6501	26.2 ± 2.065	21.945 ± 2.006	-1.194	0.00469565	50003.3	CHAIN 1-445	-->response to cytokine -->response to peptide hormone	-->extracellular space	-->serine-type endopeptidase inhibitor activity
Transthyretin <sp|P07309|TTHY_MOUSE>	3.04675	4.90532	7.15934	5.97913	4.84022	5.90116	3.91403	5.90562	4.93518	3.88092	3.9684	2.82393	5.305 ± 1.395	4.238 ± 1.056	-1.252	0.168069	15775.9	CHAIN 1-147	-->retinol metabolic process -->transport	-->extracellular space -->extracellular vesicular exosome -->protein complex	-->hormone binding
Tetranectin <sp|P43025|TETN_MOUSE>	2.03117	2.94319	2.04553	5.97913	2.90413	2.95058	3.91403	2.95281	1.97407	1.94046	4.9605	2.82393	3.142 ± 1.457	3.094 ± 1.169	-1.016	0.951129	22257.5	CHAIN 1-202	-->bone mineralization -->ossification -->positive regulation of plasminogen activation -->skeletal system development	-->cytoplasm -->extracellular exosome -->extracellular space -->granular component -->proteinaceous extracellular matrix	-->calcium ion binding -->carbohydrate binding -->heparin binding -->kringle domain binding
Secretoglobin family 2B member 24 <sp|Q7M747|S2B24_MOUSE>	6.09351	5.88639	2.04553	2.98956	3.87218	3.93411	2.93552	3.93708	2.96111	1.94046	1.9842	2.82393	4.137 ± 1.593	2.764 ± 0.739	-1.497	0.0966892	12534.5	CHAIN 1-112	-	-->extracellular space	-
Glutathione peroxidase 3 <sp|P46412|GPX3_MOUSE>	22.3429	26.4887	22.5008	17.9374	19.3609	20.6541	16.6346	14.7641	17.7666	21.3451	21.8262	16.0023	21.547 ± 2.986	18.056 ± 2.905	-1.193	0.0672134	25424.2	CHAIN 1-226	-->hydrogen peroxide catabolic process -->protein homotetramerization	-->extracellular space -->extracellular vesicular exosome	-->glutathione peroxidase activity -->selenium binding
Extracellular superoxide dismutase [Cu-Zn] <sp|O09164|SODE_MOUSE>	3.04675	5.88639	4.09105	1.99304	4.84022	3.93411	4.89253	8.85844	4.93518	4.85115	5.9526	5.64786	3.965 ± 1.357	5.856 ± 1.54	1.477	0.0480074	27391.9	CHAIN 1-251	-->cellular response to oxidative stress -->response to copper ion -->response to hypoxia	-->cytoplasm -->extracellular exosome -->extracellular matrix -->extracellular space -->Golgi lumen -->nucleus	-->copper ion binding -->superoxide dismutase activity -->zinc ion binding
Coagulation factor XIII A chain <sp|Q8BH61|F13A_MOUSE>	20.3117	20.6024	19.4325	15.9443	17.4248	21.6376	18.5916	12.7955	16.7796	21.3451	12.8973	15.061	19.226 ± 2.142	16.245 ± 3.356	-1.184	0.101871	83207.3	CHAIN 1-732	-->blood coagulation -->peptide cross-linking	-->blood microparticle -->cytoplasm	-->metal ion binding -->protein-glutamine gamma-glutamyltransferase activity
Ig lambda-1 chain C region <sp|P01843|LAC1_MOUSE>	6.09351	6.86745	5.11382	3.98608	12.5846	5.90116	7.82805	7.87417	12.8315	0	7.9368	7.53049	6.758 ± 3.017	7.333 ± 4.122	1.085	0.78862	11574.8	CHAIN 1-105	-	-->plasma membrane	-->antigen binding
Hepatocyte growth factor activator <sp|Q9R098|HGFA_MOUSE>	9.14026	8.82958	9.20487	11.9583	9.68045	10.8188	6.84954	9.84271	7.89628	3.88092	7.9368	9.41311	9.939 ± 1.21	7.637 ± 2.14	-1.301	0.0513923	70567.9	CHAIN 1-653	-	-->Extracellular region or secreted Cytosol Plasma membrane Cytoskeleton Lysosome Endosome Peroxisome ER Golgi apparatus Nucleus Mitochondrion Manual annotation Automatic computational assertionGraphics by Christian Stolte; -->rough endoplasmic reticulum -->extracellular space -->cytoplasm	-->serine-type endopeptidase activity
Apolipoprotein A-II <sp|P09813|APOA2_MOUSE>	79.2156	80.4473	53.1837	92.6765	85.1879	70.814	85.1301	92.5214	87.8461	40.7496	39.684	73.4222	76.921 ± 13.675	69.892 ± 23.837	-1.101	0.548513	11309.1	CHAIN 1-102	-->acute inflammatory response -->beta-glucoside transport -->cholesterol efflux -->cholesterol homeostasis -->cholesterol metabolic process -->diacylglycerol catabolic process -->fatty acid metabolic process -->high-density lipoprotein particle assembly -->high-density lipoprotein particle clearance -->high-density lipoprotein particle remodeling -->lipid transport -->lipoprotein metabolic proce…	-->blood microparticle -->chylomicron -->cytosol -->extracellular exosome -->extracellular region -->extracellular space -->high-density lipoprotein particle -->spherical high-density lipoprotein particle -->very-low-density lipoprotein particle	-->apolipoprotein receptor binding -->cholesterol binding -->cholesterol transporter activity -->high-density lipoprotein particle binding -->high-density lipoprotein particle receptor binding -->lipase inhibitor activity -->lipid binding -->lipid transporter activity -->phosphatidylcholine binding -->phosphatidylcholine-sterol O-acyltransferase activator activity -->phospholipid binding -->prote…
Neutrophil gelatinase-associated lipocalin <sp|P11672|NGAL_MOUSE>	0	0	0	0	0	0	0	0	0	0	1.9842	1.88262	0 ± 0	0.644 ± 0.999	100	0.174872	22875	CHAIN 1-200	-->cellular iron ion homeostasis -->cellular response to hydrogen peroxide -->cellular response to interleukin-1 -->cellular response to lipopolysaccharide -->cellular response to nutrient levels -->cellular response to tumor necrosis factor -->extrinsic apoptotic signaling pathway in absence of ligand -->innate immune response -->ion transport -->positive regulation of cell projection organizati…	-->cytosol -->extracellular exosome -->extracellular region -->extracellular space	-->iron ion binding -->small molecule binding -->transporter activity
Apolipoprotein C-III <sp|P33622|APOC3_MOUSE>	52.8104	38.2615	36.8195	61.7843	55.1786	55.0775	49.9038	72.836	54.2869	32.9878	35.7156	60.2439	49.989 ± 10.108	50.996 ± 15.049	1.02	0.894844	10982.4	CHAIN 1-99	-->cholesterol homeostasis -->cholesterol metabolic process -->lipid transport -->lipoprotein metabolic process -->negative regulation of high-density lipoprotein particle clearance -->negative regulation of lipoprotein lipase activity -->negative regulation of low-density lipoprotein particle clearance -->negative regulation of triglyceride catabolic process -->negative regulation of very-low-de…	-->cytosol -->chylomicron -->extracellular region -->intermediate-density lipoprotein particle -->spherical high-density lipoprotein particle -->very-low-density lipoprotein particle	-->high-density lipoprotein particle receptor binding -->lipase inhibitor activity -->phospholipid binding
Major urinary protein 20 <sp|Q5FW60|MUP20_MOUSE>	6.09351	3.92426	4.09105	2.98956	3.87218	6.88469	4.89253	7.87417	3.94814	7.76184	6.9447	7.53049	4.643 ± 1.502	6.492 ± 1.663	1.398	0.0711139	20929.9	CHAIN 1-181	-->aerobic respiration -->cellular response to lipid -->energy reserve metabolic process -->glucose homeostasis -->heat generation -->locomotor rhythm -->mitochondrion morphogenesis -->negative regulation of gluconeogenesis -->negative regulation of insulin secretion involved in cellular response to glucose stimulus -->negative regulation of lipid biosynthetic process -->negative regulation of li…	-->cytosol -->extracellular region -->extracellular space -->nucleus	-->insulin-activated receptor activity -->mating pheromone activity -->pheromone binding -->small molecule binding -->transporter activity
Actin, cytoplasmic 2 <sp|P63260|ACTG_MOUSE>	11.1714	12.7538	13.2959	8.96869	12.5846	26.5552	14.6776	15.7483	13.8185	15.5237	20.8341	16.9436	14.222 ± 6.24	16.258 ± 2.476	1.143	0.48341	41792.8	CHAIN 1-375	-->retina homeostasis -->sarcomere organization	-->actin cytoskeleton -->blood microparticle -->costamere -->cytosol -->extracellular vesicular exosome -->filamentous actin -->myofibril -->nucleus	-->ATP binding -->structural constituent of cytoskeleton
Actin, cytoplasmic 1 <sp|P60710|ACTB_MOUSE>	11.1714	12.7538	13.2959	8.96869	12.5846	26.5552	14.6776	15.7483	13.8185	15.5237	20.8341	16.9436	14.222 ± 6.24	16.258 ± 2.476	1.143	0.48341	41736.7	CHAIN 1-375	-->ATP-dependent chromatin remodeling -->axonogenesis -->retina homeostasis -->substantia nigra development	-->axon -->blood microparticle -->cortical cytoskeleton -->cytosol -->extracellular vesicular exosome -->MLL5-L complex -->NuA4 histone acetyltransferase complex -->nuclear chromatin -->postsynaptic density -->ribonucleoprotein complex	-->ATP binding -->RNA polymerase II core promoter proximal region sequence-specific DNA binding -->RNA polymerase II distal enhancer sequence-specific DNA binding
Actin, alpha cardiac muscle 1 <sp|P68033|ACTC_MOUSE>	9.14026	8.82958	10.2276	5.97913	9.68045	15.7364	11.7421	10.827	9.87035	12.613	13.8894	12.237	9.932 ± 3.203	11.863 ± 1.405	1.194	0.219239	42019	CHAIN 1-377	-->actin-mediated cell contraction -->actin-myosin filament sliding -->actomyosin structure organization -->cardiac muscle contraction -->cardiac muscle tissue morphogenesis -->cardiac myofibril assembly -->negative regulation of apoptotic process -->response to drug -->response to ethanol -->skeletal muscle thin filament assembly	-->actomyosin, actin portion -->blood microparticle -->extracellular vesicular exosome -->I band	-->ATPase activity -->ATP binding
Actin, alpha skeletal muscle <sp|P68134|ACTS_MOUSE>	9.14026	8.82958	10.2276	5.97913	9.68045	15.7364	11.7421	10.827	9.87035	12.613	13.8894	12.237	9.932 ± 3.203	11.863 ± 1.405	1.194	0.219239	42051	CHAIN 1-377	-->cell growth -->response to extracellular stimulus -->response to lithium ion -->response to mechanical stimulus -->response to steroid hormone -->skeletal muscle fiber adaptation -->skeletal muscle fiber development -->skeletal muscle thin filament assembly	-->actin filament -->blood microparticle -->extracellular vesicular exosome -->protein complex -->stress fiber -->striated muscle thin filament	-->ATP binding
Beta-actin-like protein 2 <sp|Q8BFZ3|ACTBL_MOUSE>	4.06234	3.92426	3.06829	1.99304	3.87218	8.85175	4.89253	4.92135	5.92221	5.82138	6.9447	6.58918	4.295 ± 2.364	5.849 ± 0.84	1.362	0.178255	42004.2	CHAIN 1-376	-	-->cytoplasm -->cytoskeleton -->extracellular space -->extracellular vesicular exosome	-->ATP binding
Ig kappa chain V-II region 2S1.3 <sp|P01629|KV2A4_MOUSE>	7.10909	5.88639	4.09105	1.99304	3.87218	2.95058	5.87104	5.90562	3.94814	0	6.9447	4.70655	4.317 ± 1.885	4.563 ± 2.466	1.057	0.850464	12220.8	CHAIN 1-112	-	-	-->antigen binding
Properdin <sp|P11680|PROP_MOUSE>	20.3117	14.716	17.387	15.9443	12.5846	18.687	16.6346	19.6854	15.7926	23.2855	15.8736	15.061	16.605 ± 2.788	17.722 ± 3.169	1.067	0.531635	50327.2	CHAIN 1-464	-->complement activation, alternative pathway	-->extracellular matrix -->extracellular region	-
Ig alpha chain C region <sp|P01878|IGHA_MOUSE>	13.2026	12.7538	10.2276	6.97565	12.5846	14.7529	5.87104	7.87417	7.89628	0	9.921	5.64786	11.75 ± 2.755	6.202 ± 3.417	-1.895	0.0119145	36875.9	CHAIN 1-344	-	-	-->antigen binding -->immunoglobulin receptor binding
Complement C1q subcomponent subunit B <sp|P14106|C1QB_MOUSE>	5.07792	4.90532	4.09105	4.98261	3.87218	3.93411	4.89253	3.93708	8.88332	1.94046	3.9684	3.76524	4.477 ± 0.567	4.565 ± 2.325	1.02	0.931915	26717.3	CHAIN 1-253	-->complement activation, classical pathway -->innate immune response -->inner ear development	-->blood microparticle -->collagen trimer -->extracellular exosome	-->protein homodimerization activity
Pigment epithelium-derived factor <sp|P97298|PEDF_MOUSE>	10.1558	12.7538	11.2504	12.9548	13.5526	15.7364	13.6991	14.7641	13.8185	14.5534	12.8973	15.061	12.734 ± 1.928	14.132 ± 0.806	1.11	0.147144	46234.1	CHAIN 1-417	-->aging -->cellular response to cobalt ion -->cellular response to dexamethasone stimulus -->cellular response to glucose stimulus -->cellular response to retinoic acid -->kidney development -->negative regulation of angiogenesis -->negative regulation of endopeptidase activity -->negative regulation of endothelial cell migration -->negative regulation of epithelial cell proliferation involved i…	-->axon hillock -->basement membrane -->extracellular region -->extracellular space -->extracellular vesicular exosome -->melanosome -->perinuclear region of cytoplasm	-->serine-type endopeptidase inhibitor activity
Plasma protease C1 inhibitor <sp|P97290|IC1_MOUSE>	14.2182	11.7728	15.3414	15.9443	14.5207	14.7529	9.78506	11.8112	11.8444	10.6725	14.8815	14.1197	14.425 ± 1.438	12.186 ± 1.966	-1.184	0.0503262	55584.5	CHAIN 1-504	-->blood coagulation -->complement activation, classical pathway -->fibrinolysis -->innate immune response -->negative regulation of complement activation, lectin pathway -->negative regulation of endopeptidase activity -->regulation of proteolysis	-->blood microparticle -->extracellular space -->extracellular vesicular exosome	-->serine-type endopeptidase inhibitor activity
Complement component C8 gamma chain <sp|Q8VCG4|CO8G_MOUSE>	9.14026	8.82958	10.2276	9.96521	10.6485	10.8188	10.7636	9.84271	8.88332	12.613	10.9131	7.53049	9.938 ± 0.804	10.091 ± 1.764	1.015	0.852509	22507.9	CHAIN 1-202	-->complement activation, alternative pathway -->complement activation, classical pathway -->cytolysis	-->blood microparticle -->extracellular vesicular exosome -->membrane attack complex	-->retinol binding
N-fatty-acyl-amino acid synthase/hydrolase PM20D1 <sp|Q8C165|P20D1_MOUSE>	5.07792	5.88639	3.06829	5.97913	3.87218	5.90116	4.89253	5.90562	2.96111	3.88092	3.9684	4.70655	4.964 ± 1.229	4.386 ± 1.013	-1.132	0.39547	55663.1	CHAIN 1-503	-->negative regulation of neuron death -->regulation of defense response to virus by host -->regulation of viral process	-->extracellular exosome	-->metal ion binding -->peptidase activity
Ig heavy chain V region <sp|P01741|HVM00_MOUSE>	0	0	0	0	0	0.983527	0	0	0	0	0	0.941311	0.164 ± 0.402	0.157 ± 0.384	-1.045	0.975873	12554.9	CHAIN 1-114	-	-	-->antigen binding
Pyruvate kinase PKM <sp|P52480|KPYM_MOUSE>	11.1714	3.92426	8.1821	5.97913	7.74436	13.7694	12.7206	15.7483	9.87035	6.79161	17.8578	13.1784	8.462 ± 3.546	12.695 ± 3.976	1.5	0.0806267	57844.9	CHAIN 1-531	-->glycolytic process -->programmed cell death	-->cilium -->extracellular matrix -->extracellular vesicular exosome -->mitochondrion -->nucleus -->plasma membrane	-->ATP binding -->magnesium ion binding -->poly(A) RNA binding -->potassium ion binding -->pyruvate kinase activity
Lysyl oxidase homolog 1 <sp|P97873|LOXL1_MOUSE>	0	0.981065	0	0	0.968045	0.983527	1.95701	0.984271	1.97407	0.97023	0	0.941311	0.489 ± 0.535	1.138 ± 0.742	2.327	0.116058	66506.3	CHAIN 1-607	-	-->extracellular space -->proteinaceous extracellular matrix	-->copper ion binding -->oxidoreductase activity, acting on the CH-NH2 group of donors, oxygen as acceptor
Catalase <sp|P24270|CATA_MOUSE>	1.01558	2.94319	2.04553	1.99304	0.968045	3.93411	0.978506	3.93708	2.96111	1.94046	0	2.82393	2.15 ± 1.143	2.107 ± 1.438	-1.02	0.955381	59795.3	CHAIN 1-527	-->aerobic respiration -->cellular response to growth factor stimulus -->cholesterol metabolic process -->hemoglobin metabolic process -->hydrogen peroxide catabolic process -->menopause -->negative regulation of apoptotic process -->negative regulation of NF-kappaB transcription factor activity -->osteoblast differentiation -->positive regulation of cell division -->positive regulation of NF-kap…	-->cytosol -->endoplasmic reticulum -->extracellular vesicular exosome -->Golgi apparatus -->lysosome -->mitochondrial intermembrane space -->mitochondrion -->peroxisomal membrane -->peroxisome -->plasma membrane	-->aminoacylase activity -->catalase activity -->heme binding -->metal ion binding -->NADP binding -->oxidoreductase activity, acting on peroxide as acceptor
Complement C1r-A subcomponent <sp|Q8CG16|C1RA_MOUSE>	16.2494	14.716	11.2504	20.9269	16.4568	12.7859	22.5056	14.7641	13.8185	2.91069	14.8815	13.1784	15.398 ± 3.374	13.676 ± 6.273	-1.126	0.570963	80073.4	CHAIN 1-707	-->complement activation, classical pathway -->innate immune response	-->blood microparticle -->extracellular exosome -->extracellular space	-->calcium ion binding -->serine-type endopeptidase activity
Ig heavy chain V region 1-72 <sp|P06328|HVM49_MOUSE>	0	0	0	0	0	0	17.6131	8.85844	12.8315	0	15.8736	11.2957	0 ± 0	11.079 ± 6.269	100	0.0075059			-	-	-
Ig heavy chain V region 1-62-3 <sp|P01754|HVM10_MOUSE>	0	0	0	0	0	0	17.6131	8.85844	12.8315	0	15.8736	11.2957	0 ± 0	11.079 ± 6.269	100	0.0075059			-	-	-
Ig kappa chain V-II region 7S34.1 <sp|P01630|KV2A6_MOUSE>	8.12468	6.86745	6.13658	2.98956	3.87218	2.95058	6.84954	7.87417	5.92221	0	8.9289	4.70655	5.157 ± 2.187	5.714 ± 3.162	1.108	0.731086	12496.2	CHAIN 1-113	-	-	-->antigen binding
Cadherin-5 <sp|P55284|CADH5_MOUSE>	3.04675	0.981065	2.04553	2.98956	2.90413	3.93411	2.93552	2.95281	4.93518	1.94046	0.9921	4.70655	2.65 ± 1.014	3.077 ± 1.535	1.161	0.584147	87903	CHAIN 1-784	-->blood vessel maturation -->cell-cell adhesion -->cell-cell junction assembly -->homophilic cell adhesion via plasma membrane adhesion molecules -->negative regulation of cell proliferation -->positive regulation of establishment of endothelial barrier -->regulation of establishment of cell polarity -->transforming growth factor beta receptor signaling pathway	-->external side of plasma membrane -->plasma membrane -->adherens junction -->bicellular tight junction -->cell junction -->cell periphery -->cell surface -->cell-cell adherens junction -->cell-cell junction -->integral component of membrane	-->beta-catenin binding -->calcium ion binding -->ion channel binding -->protein phosphatase binding -->receptor binding
Apolipoprotein D <sp|P51910|APOD_MOUSE>	14.2182	14.716	12.2732	14.9478	17.4248	16.72	16.6346	16.7326	14.8055	15.5237	12.8973	14.1197	15.05 ± 1.841	15.119 ± 1.49	1.005	0.94465	21529.8	CHAIN 1-189	-->aging -->brain development -->glucose metabolic process -->lipid metabolic process -->negative regulation of cytokine production involved in inflammatory response -->negative regulation of focal adhesion assembly -->negative regulation of lipoprotein lipid oxidation -->negative regulation of monocyte chemotactic protein-1 production -->negative regulation of platelet-derived growth factor rece…	-->cytosolic ribosome -->endoplasmic reticulum -->extracellular exosome -->extracellular region -->extracellular space -->dendrite -->intracellular -->neuronal cell body -->perinuclear region of cytoplasm	-->cholesterol binding -->transporter activity
Complement C1q subcomponent subunit C <sp|Q02105|C1QC_MOUSE>	4.06234	2.94319	5.11382	4.98261	3.87218	4.91764	2.93552	2.95281	3.94814	1.94046	2.9763	3.76524	4.315 ± 0.847	3.086 ± 0.717	-1.398	0.0223473	25991.6	CHAIN 1-246	-->complement activation, classical pathway -->innate immune response -->negative regulation of granulocyte differentiation -->negative regulation of macrophage differentiation	-->blood microparticle -->collagen trimer -->extracellular vesicular exosome -->membrane	-
Ig kappa chain V-III region PC 2154 <sp|P01674|KV3AM_MOUSE>	1.01558	0.981065	1.02276	0.996521	1.93609	0	4.89253	0.984271	1.97407	0	3.9684	4.70655	0.992 ± 0.613	2.754 ± 2.058	2.776	0.0921356	11699	CHAIN 1-108	-	-	-->antigen binding
Odorant-binding protein 1a <sp|Q9D3H2|OBP1A_MOUSE>	9.14026	15.697	5.11382	3.98608	4.84022	4.91764	2.93552	5.90562	7.89628	2.91069	3.9684	2.82393	7.283 ± 4.503	4.407 ± 2.075	-1.653	0.198172	18469.1	CHAIN 1-163	-->response to stimulus -->sensory perception of smell	-->extracellular region	-->odorant binding -->transporter activity
Thrombospondin-1 <sp|P35441|TSP1_MOUSE>	3.04675	14.716	13.2959	6.97565	0	3.93411	11.7421	3.93708	7.89628	2.91069	0.9921	2.82393	6.995 ± 5.886	5.05 ± 4.003	-1.385	0.520568	129647	CHAIN 1-1170	-->behavioral response to pain -->blood vessel morphogenesis -->cell adhesion -->endocardial cushion development -->growth plate cartilage development -->inflammatory response -->negative regulation of angiogenesis -->outflow tract morphogenesis -->positive regulation of cell-substrate adhesion -->positive regulation of macrophage chemotaxis -->positive regulation of transforming growth factor be…	-->endoplasmic reticulum -->extracellular matrix -->extracellular space -->sarcoplasmic reticulum	-->calcium ion binding -->extracellular matrix binding -->heparin binding
Serum paraoxonase/arylesterase 1 <sp|P52430|PON1_MOUSE>	9.14026	11.7728	8.1821	9.96521	9.68045	11.8023	7.82805	9.84271	10.8574	7.76184	7.9368	5.64786	10.091 ± 1.448	8.312 ± 1.822	-1.214	0.0923249	39565.2	CHAIN 1-355	-->aromatic compound catabolic process -->blood circulation -->carboxylic acid catabolic process -->cholesterol metabolic process -->dephosphorylation -->organophosphate catabolic process -->phosphatidylcholine metabolic process -->positive regulation of binding -->positive regulation of cholesterol efflux -->positive regulation of transporter activity -->response to fatty acid -->response to flu…	-->blood microparticle -->extracellular vesicular exosome -->intracellular membrane-bounded organelle -->spherical high-density lipoprotein particle	-->aryldialkylphosphatase activity -->arylesterase activity -->calcium ion binding -->high-density lipoprotein particle binding -->phospholipid binding
Hepatocyte growth factor-like protein <sp|P26928|HGFL_MOUSE>	5.07792	5.88639	3.06829	6.97565	7.74436	7.86822	7.82805	4.92135	5.92221	6.79161	5.9526	5.64786	6.103 ± 1.837	6.177 ± 1.008	1.012	0.933428	80619.1	CHAIN 1-716	-->embryo implantation -->mammary duct terminal end bud growth -->mammary gland development -->negative regulation of epithelial cell apoptotic process -->negative regulation of gluconeogenesis -->positive regulation of gene expression -->positive regulation of mammary gland epithelial cell proliferation -->regulation of cAMP-dependent protein kinase activity -->regulation of JAK-STAT cascade -->…	-->extracellular exosome -->extracellular space -->vacuole	-->receptor tyrosine kinase binding -->serine-type endopeptidase activity
Vitamin K-dependent protein C <sp|P33587|PROC_MOUSE>	2.03117	4.90532	4.09105	4.98261	3.87218	5.90116	2.93552	4.92135	1.97407	2.91069	2.9763	2.82393	4.297 ± 1.324	3.09 ± 0.974	-1.391	0.104965	51818.1	CHAIN 1-460	-->blood coagulation -->liver development -->negative regulation of apoptotic process -->negative regulation of blood coagulation -->negative regulation of coagulation -->negative regulation of inflammatory response -->positive regulation of establishment of endothelial barrier -->regulation of circulating fibrinogen levels	-->endoplasmic reticulum -->extracellular space -->Golgi apparatus	-->calcium ion binding -->peptidase activity -->serine-type endopeptidase activity
Cytochrome c, somatic <sp|P62897|CYC_MOUSE>	6.09351	5.88639	6.13658	3.98608	4.84022	7.86822	3.91403	5.90562	3.94814	7.76184	5.9526	4.70655	5.802 ± 1.319	5.365 ± 1.478	-1.081	0.60093	11605.4	CHAIN 1-105	-->apoptotic process -->oxidation-reduction process	-->mitochondrion -->respiratory chain	-->electron carrier activity -->heme binding -->iron ion binding
Complement C2 <sp|P21180|CO2_MOUSE>	4.06234	5.88639	7.15934	5.97913	4.84022	10.8188	5.87104	7.87417	12.8315	8.73207	4.9605	10.3544	6.458 ± 2.384	8.437 ± 2.9	1.306	0.226644	84741.5	CHAIN 1-760	-->complement activation -->complement activation, classical pathway -->innate immune response -->positive regulation of apoptotic cell clearance -->response to nutrient	-->extracellular exosome -->extracellular space	-->metal ion binding -->serine-type endopeptidase activity
Sulfhydryl oxidase 1 <sp|Q8BND5|QSOX1_MOUSE>	21.3273	22.5645	20.4553	22.92	16.4568	26.5552	24.4627	22.6382	19.7407	23.2855	26.7867	29.1806	21.713 ± 3.316	24.349 ± 3.304	1.121	0.197902	82785.4	CHAIN 1-748	-->cell redox homeostasis -->negative regulation of macroautophagy	-->Extracellular region or secreted Cytosol Plasma membrane Cytoskeleton Lysosome Endosome Peroxisome ER Golgi apparatus Nucleus Mitochondrion Manual annotation Automatic computational assertionGraphics by Christian Stolte; -->endoplasmic reticulum -->extracellular exosome -->extracellular space -->intercellular bridge -->Golgi apparatus -->integral component of Golgi membrane -->intracellular me…	-->flavin-linked sulfhydryl oxidase activity -->protein disulfide isomerase activity
Beta-2-microglobulin <sp|P01887|B2MG_MOUSE>	23.3584	27.4698	29.6601	25.9096	24.2011	25.5717	25.4412	27.5596	21.7148	24.2557	16.8657	17.8849	26.028 ± 2.278	22.287 ± 4.26	-1.168	0.0960831	13779	CHAIN 1-119	-->antigen processing and presentation of exogenous protein antigen via MHC class Ib, TAP-dependent -->antigen processing and presentation of peptide antigen via MHC class I -->cellular defense response -->iron ion homeostasis -->positive regulation of T cell mediated cytotoxicity -->protein refolding -->response to cadmium ion -->response to drug -->response to molecule of bacterial origin -->re…	-->external side of plasma membrane -->extracellular space -->extracellular vesicular exosome -->Golgi apparatus -->MHC class I protein complex -->phagocytic vesicle membrane	-
Glyceraldehyde-3-phosphate dehydrogenase <sp|P16858|G3P_MOUSE>	0	1.96213	0	0	0.968045	1.96705	2.93552	1.96854	0.987035	0.97023	0.9921	4.70655	0.816 ± 0.965	2.093 ± 1.5	2.565	0.115216	35810	CHAIN 1-333	-->glucose metabolic process -->glycolytic process -->microtubule cytoskeleton organization -->negative regulation of translation -->neuron apoptotic process -->peptidyl-cysteine S-trans-nitrosylation -->protein stabilization	-->cytoplasm -->cytosol -->GAIT complex -->microtubule cytoskeleton -->nucleus	-->enzyme binding -->glyceraldehyde-3-phosphate dehydrogenase (NAD+) (phosphorylating) activity -->microtubule binding -->NAD binding -->NADP binding -->peptidyl-cysteine S-nitrosylase activity
Peptidase inhibitor 16 <sp|Q9ET66|PI16_MOUSE>	2.03117	2.94319	4.09105	1.99304	3.87218	3.93411	2.93552	3.93708	1.97407	2.91069	2.9763	5.64786	3.144 ± 0.965	3.397 ± 1.266	1.08	0.705931			-	-	-
GDH/6PGL endoplasmic bifunctional protein <sp|Q8CFX1|G6PE_MOUSE>	0	0	0	0.996521	0	0	0	0	1.97407	2.91069	0	0	0.166 ± 0.407	0.814 ± 1.296	4.904	0.286919	88927.8	CHAIN 1-789	-->glucose metabolic process -->pentose-phosphate shunt	-->endoplasmic reticulum lumen	-->6-phosphogluconolactonase activity -->glucose 1-dehydrogenase [NAD(P)] activity -->glucose-6-phosphate dehydrogenase activity -->NADP binding
Interleukin-1 receptor accessory protein <sp|Q61730|IL1AP_MOUSE>	21.3273	28.4509	25.5691	20.9269	21.297	23.6047	23.4842	23.6225	22.7018	16.4939	17.8578	22.5915	23.529 ± 3	21.125 ± 3.116	-1.114	0.20333	65740.8	CHAIN 1-570	-->cytokine-mediated signaling pathway -->inflammatory response -->innate immune response -->interleukin-2 biosynthetic process -->interleukin-33-mediated signaling pathway -->interleukin-4 secretion -->positive regulation of dendrite development -->positive regulation of interleukin-13 production -->positive regulation of interleukin-5 production -->positive regulation of interleukin-6 secretion…	-->extracellular space -->plasma membrane -->integral component of membrane -->membrane	-->interleukin-1 receptor activity -->interleukin-33 receptor activity -->protein tyrosine kinase binding -->signal transducer activity
Vitamin K-dependent protein Z <sp|Q9CQW3|PROZ_MOUSE>	4.06234	3.92426	4.09105	6.97565	2.90413	4.91764	2.93552	2.95281	2.96111	2.91069	3.9684	4.70655	4.479 ± 1.381	3.406 ± 0.759	-1.315	0.134921	44304.4	CHAIN 1-399	-->blood coagulation -->negative regulation of blood coagulation	-->extracellular exosome -->extracellular region -->extracellular space	-->calcium ion binding -->serine-type endopeptidase activity
Proteasome subunit alpha type-6 <sp|Q9QUM9|PSA6_MOUSE>	2.03117	1.96213	2.04553	3.98608	1.93609	1.96705	0.978506	1.96854	1.97407	2.91069	0.9921	0	2.321 ± 0.817	1.471 ± 1.021	-1.578	0.143469	27372.4	CHAIN 1-246	-->positive regulation of NF-kappaB transcription factor activity -->proteolysis involved in cellular protein catabolic process -->skeletal muscle tissue development -->ubiquitin-dependent protein catabolic process	-->cytoplasm -->cytoplasmic mRNA processing body -->cytosol -->extracellular vesicular exosome -->myofibril -->nuclear matrix -->polysome -->proteasome core complex -->proteasome core complex, alpha-subunit complex -->sarcomere	-->RNA binding -->threonine-type endopeptidase activity
Fructose-bisphosphate aldolase A <sp|P05064|ALDOA_MOUSE>	2.03117	0.981065	2.04553	0	0.968045	2.95058	4.89253	2.95281	3.94814	3.88092	3.9684	3.76524	1.496 ± 1.047	3.901 ± 0.618	2.608	0.0012346	39355.9	CHAIN 1-364	-->glycolytic process -->protein homotetramerization	-->membrane -->protein complex -->Z disc	-->fructose-bisphosphate aldolase activity -->protease binding
Mannan-binding lectin serine protease 1 <sp|P98064|MASP1_MOUSE>	7.10909	6.86745	5.11382	4.98261	5.80827	5.90116	4.89253	7.87417	4.93518	9.7023	8.9289	3.76524	5.964 ± 0.877	6.683 ± 2.464	1.121	0.524604	79968.3	CHAIN 1-704	-->complement activation, lectin pathway	-->Extracellular region or secreted Cytosol Plasma membrane Cytoskeleton Lysosome Endosome Peroxisome ER Golgi apparatus Nucleus Mitochondrion Manual annotation Automatic computational assertionGraphics by Christian Stolte; -->cytosol -->extracellular space -->nucleoplasm	-->calcium-dependent protein binding -->calcium ion binding -->protein homodimerization activity -->serine-type endopeptidase activity
Proteasome subunit alpha type-1 <sp|Q9R1P4|PSA1_MOUSE>	0	0	0	0	0	0	0.978506	1.96854	0	1.94046	1.9842	2.82393	0 ± 0	1.616 ± 0.984	100	0.0100982	29546.5	CHAIN 1-263	-->immune system process -->negative regulation of inflammatory response to antigenic stimulus -->ubiquitin-dependent protein catabolic process	-->cytosol -->nucleus -->proteasome complex -->proteasome core complex -->proteasome core complex, alpha-subunit complex	-->lipopolysaccharide binding -->threonine-type endopeptidase activity
Fumarylacetoacetase <sp|P35505|FAAA_MOUSE>	0	0	0	0	0	0	0	0.984271	0.987035	6.79161	0	0.941311	0 ± 0	1.617 ± 2.579	100	0.18512	46175.8	CHAIN 1-419	-->arginine catabolic process -->L-phenylalanine catabolic process -->tyrosine catabolic process	-->extracellular vesicular exosome	-->fumarylacetoacetase activity -->metal ion binding
Ig heavy chain V region 5-84 <sp|P18525|HVM54_MOUSE>	3.04675	3.92426	4.09105	4.98261	4.84022	2.95058	6.84954	2.95281	6.90925	0	3.9684	0.941311	3.973 ± 0.859	3.604 ± 2.902	-1.102	0.775449			-	-	-
Ig heavy chain V region 5-76 <sp|P18529|HVM58_MOUSE>	2.03117	2.94319	3.06829	3.98608	2.90413	0.983527	8.80656	3.93708	5.92221	0	0.9921	0.941311	2.653 ± 1.027	3.433 ± 3.443	1.294	0.614155			-	-	-
Coagulation factor IX <sp|P16294|FA9_MOUSE>	8.12468	6.86745	8.1821	8.96869	6.77631	7.86822	4.89253	10.827	5.92221	3.88092	5.9526	10.3544	7.798 ± 0.841	6.972 ± 2.909	-1.118	0.529491	52977.9	CHAIN 1-471	-->blood coagulation -->proteolysis -->zymogen activation	-->extracellular exosome -->extracellular space	-->calcium ion binding -->endopeptidase activity -->peptidase activity -->serine-type endopeptidase activity
Mannan-binding lectin serine protease 2 <sp|Q91WP0|MASP2_MOUSE>	1.01558	9.81065	5.11382	7.97217	8.7124	6.88469	7.82805	8.85844	9.87035	7.76184	3.9684	8.4718	6.585 ± 3.166	7.793 ± 2.027	1.183	0.45251	75516.6	CHAIN 1-685	-->complement activation, classical pathway -->complement activation, lectin pathway	-->extracellular exosome -->extracellular space	-->calcium-dependent protein binding -->calcium ion binding -->complement component C4b binding -->peptidase activity -->serine-type endopeptidase activity
Resistin-like gamma <sp|Q8K426|RETNG_MOUSE>	1.01558	0.981065	1.02276	0.996521	2.90413	0.983527	0.978506	1.96854	0.987035	0.97023	1.9842	1.88262	1.317 ± 0.778	1.462 ± 0.531	1.11	0.715621			-	-	-
Heparin cofactor 2 <sp|P49182|HEP2_MOUSE>	10.1558	11.7728	10.2276	6.97565	6.77631	14.7529	13.6991	13.7798	12.8315	13.5832	7.9368	9.41311	10.11 ± 3.009	11.874 ± 2.544	1.174	0.299299	54496.7	CHAIN 1-478	-->blood coagulation -->negative regulation of endopeptidase activity	-->extracellular space -->extracellular vesicular exosome	-->heparin binding -->serine-type endopeptidase inhibitor activity
Extracellular matrix protein 1 <sp|Q61508|ECM1_MOUSE>	8.12468	7.84852	9.20487	7.97217	8.7124	10.8188	7.82805	7.87417	6.90925	6.79161	5.9526	9.41311	8.78 ± 1.122	7.461 ± 1.195	-1.177	0.0771791	62832.3	CHAIN 1-559	-->angiogenesis -->biomineral tissue development -->inflammatory response -->negative regulation of bone mineralization -->negative regulation of cytokine-mediated signaling pathway -->negative regulation of peptidase activity -->ossification -->positive regulation of angiogenesis -->positive regulation of endothelial cell proliferation -->positive regulation of I-kappaB kinase/NF-kappaB signalin…	-->extracellular exosome -->extracellular matrix -->extracellular space -->proteinaceous extracellular matrix	-->enzyme binding -->interleukin-2 receptor binding -->laminin binding -->protease binding -->protein C-terminus binding -->signal transducer activity
Carboxypeptidase Q <sp|Q9WVJ3|CBPQ_MOUSE>	3.04675	0.981065	3.06829	0.996521	2.90413	1.96705	2.93552	2.95281	3.94814	4.85115	2.9763	5.64786	2.161 ± 0.995	3.885 ± 1.153	1.798	0.0199879	51813.3	CHAIN 1-470	-->peptide catabolic process -->proteolysis -->thyroid hormone generation -->tissue regeneration	-->Extracellular region or secreted Cytosol Plasma membrane Cytoskeleton Lysosome Endosome Peroxisome ER Golgi apparatus Nucleus Mitochondrion Manual annotation Automatic computational assertionGraphics by Christian Stolte; -->endoplasmic reticulum -->extracellular space -->Golgi apparatus -->lysosome -->cytoplasm -->intracellular membrane-bounded organelle	-->carboxypeptidase activity -->metal ion binding -->metallodipeptidase activity -->protein homodimerization activity
Plastin-2 <sp|Q61233|PLSL_MOUSE>	0	0.981065	0	0.996521	0.968045	1.96705	1.95701	1.96854	0.987035	2.91069	1.9842	4.70655	0.819 ± 0.74	2.419 ± 1.275	2.954	0.0287946	70149.3	CHAIN 1-627	-->actin filament bundle assembly -->cell migration -->organ regeneration -->protein kinase A signaling -->regulation of intracellular protein transport -->T cell activation involved in immune response	-->actin filament -->cytoplasm -->cytosol -->extracellular space -->extracellular vesicular exosome -->filopodium -->focal adhesion -->phagocytic cup -->ruffle -->stress fiber	-->actin filament binding -->calcium ion binding -->identical protein binding
Apolipoprotein C-I <sp|P34928|APOC1_MOUSE>	37.5766	36.2994	38.865	30.8922	32.9135	36.3905	45.9898	39.3708	50.3388	31.0474	32.7393	39.5351	35.49 ± 3	39.837 ± 7.431	1.122	0.228074	9696.4	CHAIN 1-88	-->cholesterol efflux -->cholesterol metabolic process -->chylomicron remnant clearance -->lipoprotein metabolic process -->negative regulation of cholesterol transport -->negative regulation of fatty acid biosynthetic process -->negative regulation of lipoprotein lipase activity -->negative regulation of phosphatidylcholine catabolic process -->negative regulation of receptor-mediated endocytosi…	-->endoplasmic reticulum -->extracellular exosome -->high-density lipoprotein particle -->very-low-density lipoprotein particle	-->fatty acid binding -->phospholipase inhibitor activity
Major urinary protein 4 <sp|P11590|MUP4_MOUSE>	1.01558	6.86745	0	0	0	0.983527	0	0.984271	3.94814	4.85115	0	2.82393	1.478 ± 2.685	2.101 ± 2.077	1.422	0.663013	20541.7	CHAIN 1-178	-->aerobic respiration -->cellular response to lipid -->energy reserve metabolic process -->glucose homeostasis -->heat generation -->locomotor rhythm -->mitochondrion morphogenesis -->negative regulation of gluconeogenesis -->negative regulation of insulin secretion involved in cellular response to glucose stimulus -->negative regulation of lipid biosynthetic process -->negative regulation of li…	-->cytosol -->extracellular space -->nucleus	-->insulin-activated receptor activity -->pheromone binding -->small molecule binding -->transporter activity
Alpha-amylase 1 <sp|P00687|AMY1_MOUSE>	6.09351	7.84852	11.2504	5.97913	4.84022	8.85175	6.84954	5.90562	6.90925	2.91069	2.9763	2.82393	7.477 ± 2.34	4.729 ± 2.032	-1.581	0.0554953	57643.7	CHAIN 1-511	-->carbohydrate catabolic process	-->extracellular exosome -->extracellular space	-->alpha-amylase activity -->amylase activity -->calcium ion binding -->chloride ion binding
Selenoprotein P <sp|P70274|SEPP1_MOUSE>	15.2338	14.716	16.3642	15.9443	17.4248	14.7529	13.6991	16.7326	18.7537	17.4641	11.9052	11.2957	15.739 ± 1.053	14.975 ± 3.103	-1.051	0.588136	41205.2	CHAIN 1-380	-->brain development -->growth -->locomotory behavior -->post-embryonic development -->selenium compound metabolic process -->sexual reproduction	-->extracellular exosome -->extracellular region -->extracellular space	-->selenium binding
H-2 class I histocompatibility antigen, D-K alpha chain <sp|P14426|HA13_MOUSE>	3.04675	2.94319	2.04553	4.98261	2.90413	3.93411	1.95701	1.96854	1.97407	2.91069	2.9763	5.64786	3.309 ± 1.015	2.906 ± 1.426	-1.139	0.585998	40619.9	CHAIN 1-362	-->antigen processing and presentation of endogenous peptide antigen via MHC class I via ER pathway, TAP-dependent -->antigen processing and presentation of exogenous peptide antigen via MHC class I, TAP-dependent -->antigen processing and presentation of peptide antigen via MHC class I -->immune response -->negative regulation of neuron projection development -->positive regulation of T cell med…	-->cell surface -->endoplasmic reticulum -->endoplasmic reticulum exit site -->external side of plasma membrane -->extracellular exosome -->Golgi apparatus -->Golgi medial cisterna -->integral component of lumenal side of endoplasmic reticulum membrane -->membrane -->MHC class I protein complex -->phagocytic vesicle membrane -->plasma membrane	-->beta-2-microglobulin binding -->peptide antigen binding -->poly(A) RNA binding -->receptor binding -->TAP binding -->T cell receptor binding
Apolipoprotein C-IV <sp|Q61268|APOC4_MOUSE>	19.2961	18.6402	15.3414	21.9235	13.5526	17.7035	17.6131	22.6382	16.7796	10.6725	17.8578	21.6501	17.743 ± 2.967	17.869 ± 4.245	1.007	0.953908	14288.5	CHAIN 1-124	-->positive regulation of sequestering of triglyceride -->triglyceride homeostasis	-->high-density lipoprotein particle -->very-low-density lipoprotein particle	-->lipid transporter activity
Fibrinogen-like protein 1 <sp|Q71KU9|FGL1_MOUSE>	0	0	0	0	0	0	1.95701	0	0	0	0	2.82393	0 ± 0	0.797 ± 1.265	100	0.183351	36439.5	CHAIN 1-314	-->adipose tissue development -->cholesterol metabolic process -->regulation of glucose metabolic process -->response to stilbenoid	-->extracellular exosome	-
Chymotrypsin-like elastase family member 2A <sp|P05208|CEL2A_MOUSE>	2.03117	0.981065	1.02276	0	3.87218	2.95058	0.978506	1.96854	0.987035	1.94046	0	0.941311	1.81 ± 1.427	1.136 ± 0.737	-1.593	0.336326	28913.7	CHAIN 1-271	-->establishment of skin barrier -->proteolysis	-->extracellular space -->keratohyalin granule	-->serine hydrolase activity -->serine-type endopeptidase activity
Thioredoxin <sp|P10639|THIO_MOUSE>	0	0	0	0	0	0.983527	0	0	0	1.94046	0	0	0.164 ± 0.402	0.323 ± 0.792	1.97	0.672575	11675.4	CHAIN 1-105	-->cell redox homeostasis -->cellular response to oxidative stress -->glycerol ether metabolic process -->negative regulation of hydrogen peroxide-induced cell death -->negative regulation of protein export from nucleus -->negative regulation of transcription from RNA polymerase II promoter -->oxidation-reduction process -->positive regulation of DNA binding -->positive regulation of peptidyl-ser…	-->cytoplasm -->cytosol -->extracellular exosome -->mitochondrion -->nucleus	-->oxidoreductase activity, acting on a sulfur group of donors, disulfide as acceptor -->peptide disulfide oxidoreductase activity -->poly(A) RNA binding -->protein disulfide oxidoreductase activity
Endoplasmic reticulum chaperone BiP <sp|P20029|BIP_MOUSE>	2.03117	1.96213	4.09105	1.99304	0.968045	3.93411	1.95701	2.95281	2.96111	2.91069	4.9605	2.82393	2.497 ± 1.241	3.094 ± 0.992	1.239	0.379483	72422.1	CHAIN 1-655	-->activation of signaling protein activity involved in unfolded protein response -->cellular response to antibiotic -->cellular response to glucose starvation -->cellular response to interleukin-4 -->cerebellar Purkinje cell layer development -->cerebellum structural organization -->ER overload response -->maintenance of protein localization in endoplasmic reticulum -->negative regulation of apo…	-->cell surface -->COP9 signalosome -->endoplasmic reticulum -->endoplasmic reticulum chaperone complex -->endoplasmic reticulum-Golgi intermediate compartment -->endoplasmic reticulum lumen -->endoplasmic reticulum membrane -->extracellular region -->extracellular vesicular exosome -->integral component of endoplasmic reticulum membrane -->membrane -->midbody -->plasma membrane	-->ATP binding -->misfolded protein binding -->ribosome binding
Ig kappa chain V-IV region S107B <sp|P01680|KV4A1_MOUSE>	3.04675	2.94319	2.04553	0.996521	1.93609	0.983527	2.93552	3.93708	1.97407	0	1.9842	2.82393	1.992 ± 0.898	2.276 ± 1.33	1.143	0.675332	13722.5	CHAIN 1-129	-	-	-->antigen binding
Ig heavy chain V region MOPC 173 <sp|P01812|HVM42_MOUSE>	0	0	0	0	0	0	1.95701	2.95281	4.93518	0	0	1.88262	0 ± 0	1.955 ± 1.872	100	0.0508161			-	-	-
Ig heavy chain V region 441 <sp|P01806|HVM36_MOUSE>	1.01558	0.981065	1.02276	1.99304	7.74436	3.93411	1.95701	2.95281	4.93518	0	0	1.88262	2.782 ± 2.685	1.955 ± 1.872	-1.423	0.55131			-	-	-
Ig heavy chain V region T601 <sp|P01808|HVM38_MOUSE>	1.01558	0.981065	1.02276	1.99304	7.74436	3.93411	1.95701	2.95281	4.93518	0	0	1.88262	2.782 ± 2.685	1.955 ± 1.872	-1.423	0.55131			-	-	-
Ig heavy chain V region X44 <sp|P01807|HVM37_MOUSE>	1.01558	0.981065	1.02276	1.99304	7.74436	3.93411	1.95701	2.95281	4.93518	0	0	1.88262	2.782 ± 2.685	1.955 ± 1.872	-1.423	0.55131			-	-	-
Peptidyl-prolyl cis-trans isomerase C <sp|P30412|PPIC_MOUSE>	0	0	0	0.996521	0	0	0	0	0.987035	1.94046	0.9921	0	0.166 ± 0.407	0.653 ± 0.795	3.934	0.221012	22794.2	CHAIN 1-212	-->protein folding	-->cytoplasm -->extracellular exosome	-->cyclosporin A binding -->peptidyl-prolyl cis-trans isomerase activity
BPI fold-containing family A member 2 <sp|P07743|BPIA2_MOUSE>	1.01558	0.981065	9.20487	0.996521	0.968045	0.983527	0.978506	0.984271	1.97407	0	0	0.941311	2.358 ± 3.354	0.813 ± 0.741	-2.9	0.316475	24752.9	CHAIN 1-235	-->defense response to bacterium	-->extracellular exosome -->extracellular region -->secretory granule	-->lipopolysaccharide binding
Heat shock cognate 71 kDa protein <sp|P63017|HSP7C_MOUSE>	1.01558	0.981065	1.02276	0.996521	0.968045	1.96705	0.978506	1.96854	1.97407	2.91069	0.9921	2.82393	1.159 ± 0.397	1.941 ± 0.842	1.675	0.0778143	70871.1	CHAIN 1-646	-->ATP catabolic process -->chaperone mediated protein folding requiring cofactor -->clathrin coat disassembly -->mRNA processing -->negative regulation of fibril organization -->negative regulation of transcription, DNA-templated -->protein folding -->protein refolding -->regulation of cell cycle -->response to stress -->RNA splicing -->transcription, DNA-templated	-->blood microparticle -->cytosol -->extracellular vesicular exosome -->intracellular -->nucleolus -->nucleus -->plasma membrane -->Prp19 complex -->ribonucleoprotein complex -->spliceosomal complex	-->ATPase activity, coupled -->ATP binding -->poly(A) RNA binding -->unfolded protein binding
Heat shock 70 kDa protein 1-like <sp|P16627|HS71L_MOUSE>	1.01558	0.981065	1.02276	0.996521	0.968045	0.983527	0.978506	0.984271	0.987035	2.91069	0.9921	1.88262	0.995 ± 0.021	1.456 ± 0.798	1.463	0.216006	70637.3	CHAIN 1-641	-->binding of sperm to zona pellucida -->cell differentiation -->multicellular organismal development -->protein refolding -->response to stress -->spermatogenesis	-->blood microparticle -->cell body -->COP9 signalosome -->cytosol -->mitochondrial matrix -->zona pellucida receptor complex	-->ATP binding
H-2 class I histocompatibility antigen, K-D alpha chain <sp|P01902|HA1D_MOUSE>	3.04675	1.96213	2.04553	3.98608	1.93609	1.96705	1.95701	1.96854	0	0	0.9921	2.82393	2.491 ± 0.849	1.29 ± 1.155	-1.931	0.0699384	41489.9	CHAIN 1-368	-->antigen processing and presentation of endogenous peptide antigen via MHC class I via ER pathway, TAP-dependent -->antigen processing and presentation of exogenous peptide antigen via MHC class I -->defense response to bacterium -->immune response -->inner ear development -->positive regulation of T cell mediated cytotoxicity	-->cell surface -->endoplasmic reticulum -->endoplasmic reticulum exit site -->external side of plasma membrane -->extracellular vesicular exosome -->Golgi apparatus -->Golgi medial cisterna -->integral component of lumenal side of endoplasmic reticulum membrane -->membrane -->MHC class I protein complex -->phagocytic vesicle membrane	-->beta-2-microglobulin binding -->peptide antigen binding -->poly(A) RNA binding -->receptor binding -->TAP binding -->T cell receptor binding
Ig heavy chain V region M511 <sp|P01790|HVM21_MOUSE>	0	0	0	0	0	0	0.978506	0	0.987035	0	8.9289	0.941311	0 ± 0	1.973 ± 3.441	100	0.219196	13652.2	CHAIN 1-122	-	-	-->antigen binding
Ig heavy chain V region M603 <sp|P01789|HVM20_MOUSE>	0	0	0	0	0	0	1.95701	0	0.987035	0	6.9447	0	0 ± 0	1.648 ± 2.711	100	0.196562	13626.3	CHAIN 1-122	-	-	-->antigen binding
Neuropilin-1 <sp|P97333|NRP1_MOUSE>	0	0	0	0	0	0.983527	0.978506	0.984271	0.987035	0.97023	0	0.941311	0.164 ± 0.402	0.81 ± 0.397	4.939	0.0187076			-	-	-
Angiotensin-converting enzyme <sp|P09470|ACE_MOUSE>	1.01558	0.981065	0	0	0.968045	1.96705	1.95701	1.96854	0	1.94046	2.9763	1.88262	0.822 ± 0.741	1.787 ± 0.97	2.174	0.0833993	150918	CHAIN 1-1312	-->arachidonic acid secretion -->beta-amyloid metabolic process -->cell proliferation in bone marrow -->heart contraction -->hormone catabolic process -->kidney development -->negative regulation of gap junction assembly -->negative regulation of gene expression -->negative regulation of protein binding -->neutrophil mediated immunity -->peptide catabolic process -->positive regulation of peptidy…	-->cytoplasm -->endosome -->external side of plasma membrane -->extracellular exosome -->extracellular space -->integral component of membrane -->lysosome -->plasma membrane	-->actin binding -->bradykinin receptor binding -->carboxypeptidase activity -->chloride ion binding -->drug binding -->endopeptidase activity -->exopeptidase activity -->metallodipeptidase activity -->metallopeptidase activity -->mitogen-activated protein kinase binding -->mitogen-activated protein kinase kinase binding -->peptidase activity -->peptidyl-dipeptidase activity -->tripeptidyl-peptid…
Ubiquitin-60S ribosomal protein L40 <sp|P62984|RL40_MOUSE>	1.01558	2.94319	2.04553	0.996521	0.968045	1.96705	1.95701	1.96854	0.987035	0.97023	0	0.941311	1.656 ± 0.803	1.137 ± 0.741	-1.456	0.272111	14728.3	CHAIN 1-128	-->translation	-->cytosol -->nucleoplasm -->ribosome	-->structural constituent of ribosome
Glutathione S-transferase omega-1 <sp|O09131|GSTO1_MOUSE>	7.10909	9.81065	7.15934	4.98261	5.80827	4.91764	4.89253	5.90562	7.89628	3.88092	4.9605	7.53049	6.631 ± 1.841	5.844 ± 1.587	-1.135	0.446639	27497.6	CHAIN 1-240	-->cellular oxidant detoxification -->cellular response to arsenic-containing substance -->L-ascorbic acid biosynthetic process -->L-ascorbic acid metabolic process -->negative regulation of ryanodine-sensitive calcium-release channel activity -->positive regulation of ryanodine-sensitive calcium-release channel activity -->regulation of release of sequestered calcium ion into cytosol by sarcopla…	-->axon -->basement membrane -->cell body -->cytoplasm -->cytosol -->extracellular exosome -->myelin sheath -->nuclear membrane	-->glutathione dehydrogenase (ascorbate) activity -->glutathione transferase activity -->methylarsonate reductase activity -->oxidoreductase activity
Platelet factor 4 <sp|Q9Z126|PLF4_MOUSE>	1.01558	4.90532	7.15934	1.99304	0.968045	3.93411	3.91403	1.96854	3.94814	0.97023	0	2.82393	3.329 ± 2.459	2.271 ± 1.597	-1.466	0.400704	11243.5	CHAIN 1-105	-->chemokine-mediated signaling pathway -->cytokine-mediated signaling pathway -->G-protein coupled receptor signaling pathway -->immune response -->inflammatory response -->leukocyte chemotaxis -->negative regulation of angiogenesis -->negative regulation of cytolysis -->negative regulation of extrinsic apoptotic signaling pathway in absence of ligand -->negative regulation of megakaryocyte diff…	-->extracellular space -->platelet alpha granule -->protein complex	-->chemokine activity -->CXCR3 chemokine receptor binding -->CXCR chemokine receptor binding -->heparin binding
Alpha-2-macroglobulin-P <sp|Q6GQT1|A2MG_MOUSE>	5.07792	9.81065	7.15934	5.97913	7.74436	7.86822	6.84954	8.85844	5.92221	7.76184	6.9447	6.58918	7.273 ± 1.644	7.154 ± 1.024	-1.017	0.884019	164353	CHAIN 1-1474	-->female pregnancy -->negative regulation of complement activation, lectin pathway -->stem cell differentiation	-->blood microparticle -->extracellular exosome	-->calcium-dependent protein binding -->enzyme binding -->growth factor binding -->interleukin-1 binding -->interleukin-8 binding -->peptidase inhibitor activity -->protease binding -->receptor binding -->serine-type endopeptidase inhibitor activity -->tumor necrosis factor binding
Vinculin <sp|Q64727|VINC_MOUSE>	2.03117	0.981065	3.06829	1.99304	1.93609	8.85175	0.978506	2.95281	0.987035	3.88092	1.9842	1.88262	3.144 ± 2.873	2.111 ± 1.136	-1.489	0.441914	116717	CHAIN 1-1066	-->adherens junction assembly -->apical junction assembly -->cell adhesion -->epithelial cell-cell adhesion -->lamellipodium assembly -->morphogenesis of an epithelium -->protein localization to cell surface -->regulation of cell migration	-->actin cytoskeleton -->adherens junction -->cell-cell junction -->costamere -->cytoplasm -->extracellular vesicular exosome -->fascia adherens -->focal adhesion -->plasma membrane -->protein complex	-->structural molecule activity
C4b-binding protein <sp|P08607|C4BPA_MOUSE>	4.06234	2.94319	4.09105	3.98608	2.90413	4.91764	6.84954	4.92135	3.94814	6.79161	6.9447	8.4718	3.817 ± 0.771	6.321 ± 1.619	1.656	0.01076	51523.7	CHAIN 1-469	-->complement activation, classical pathway -->innate immune response	-->Extracellular region or secreted Cytosol Plasma membrane Cytoskeleton Lysosome Endosome Peroxisome ER Golgi apparatus Nucleus Mitochondrion Manual annotation Automatic computational assertionGraphics by Christian Stolte; -->extracellular region	-
Ig kappa chain V19-17 <sp|P01633|KV5A1_MOUSE>	7.10909	8.82958	7.15934	5.97913	6.77631	5.90116	8.80656	5.90562	6.90925	0	10.9131	9.41311	6.959 ± 1.065	6.991 ± 3.863	1.005	0.984974	16433.6	CHAIN 1-149	-->immune response -->immunoglobulin production	-->Extracellular region or secreted Cytosol Plasma membrane Cytoskeleton Lysosome Endosome Peroxisome ER Golgi apparatus Nucleus Mitochondrion Manual annotation Automatic computational assertionGraphics by Christian Stolte; -->extracellular space -->plasma membrane	-->antigen binding
Ig kappa chain V-V region MOPC 21 <sp|P01634|KV5A2_MOUSE>	6.09351	5.88639	4.09105	2.98956	6.77631	3.93411	5.87104	6.88989	3.94814	0	5.9526	6.58918	4.962 ± 1.492	4.875 ± 2.599	-1.018	0.945265	14901.9	CHAIN 1-136	-->immune response -->immunoglobulin production	-->extracellular space	-->antigen binding
Ig kappa chain V-V region UPC 61 <sp|P01650|KV5AH_MOUSE>	5.07792	2.94319	2.04553	0	1.93609	0.983527	1.95701	1.96854	0.987035	0	2.9763	1.88262	2.164 ± 1.746	1.629 ± 1.017	-1.328	0.53406			-	-	-
Ig kappa chain V-V region J606 <sp|P01652|KV5AK_MOUSE>	0	0	0	0	0	0	1.95701	1.96854	0.987035	0	2.9763	1.88262	0 ± 0	1.629 ± 1.017	100	0.0111399	11810.3	CHAIN 1-108	-	-	-->antigen binding
Ig kappa chain V-V region W3082 <sp|P01653|KV5AL_MOUSE>	5.07792	2.94319	2.04553	0	1.93609	0.983527	1.95701	1.96854	0.987035	0	2.9763	1.88262	2.164 ± 1.746	1.629 ± 1.017	-1.328	0.53406			-	-	-
Transferrin receptor protein 1 <sp|Q62351|TFR1_MOUSE>	3.04675	3.92426	5.11382	3.98608	3.87218	3.93411	3.91403	5.90562	3.94814	5.82138	1.9842	1.88262	3.98 ± 0.659	3.909 ± 1.758	-1.018	0.929843	85731.4	CHAIN 1-763	-->acute-phase response -->aging -->cellular iron ion homeostasis -->cellular response to drug -->cellular response to extracellular stimulus -->cellular response to iron ion -->iron ion import -->osteoclast differentiation -->positive regulation of bone resorption -->response to copper ion -->response to hypoxia -->response to manganese ion -->response to nutrient -->response to retinoic acid	-->basolateral plasma membrane -->blood microparticle -->cell surface -->coated pit -->cytoplasmic, membrane-bounded vesicle -->endosome -->external side of plasma membrane -->extracellular exosome -->extracellular region -->extracellular space -->extracellular vesicle -->HFE-transferrin receptor complex -->integral component of plasma membrane -->intracellular membrane-bounded organelle -->melan…	-->double-stranded RNA binding -->glycoprotein binding -->identical protein binding -->iron ion transmembrane transporter activity -->poly(A) RNA binding -->protein homodimerization activity -->transferrin receptor activity -->transferrin transmembrane transporter activity
Cystatin-C <sp|P21460|CYTC_MOUSE>	1.01558	2.94319	2.04553	1.99304	1.93609	2.95058	0.978506	1.96854	1.97407	0.97023	1.9842	4.70655	2.147 ± 0.726	2.097 ± 1.369	-1.024	0.938672	15530.8	CHAIN 1-140	-->apoptotic process -->brain development -->cell activation -->cellular response to hydrogen peroxide -->circadian sleep/wake cycle, REM sleep -->defense response -->embryo implantation -->extracellular fibril organization -->eye development -->negative regulation of blood vessel remodeling -->negative regulation of cell death -->negative regulation of collagen catabolic process -->negative regu…	-->axon -->basement membrane -->contractile fiber -->endoplasmic reticulum -->extracellular exosome -->extracellular region -->extracellular space -->lysosome -->multivesicular body -->neuronal cell body -->nuclear membrane -->perinuclear region of cytoplasm	-->beta-amyloid binding -->cysteine-type endopeptidase inhibitor activity -->endopeptidase inhibitor activity -->identical protein binding -->protease binding
Mannosyl-oligosaccharide 1,2-alpha-mannosidase IA <sp|P45700|MA1A1_MOUSE>	1.01558	0.981065	1.02276	1.99304	0.968045	0.983527	0.978506	0.984271	0.987035	0.97023	0.9921	1.88262	1.161 ± 0.408	1.132 ± 0.368	-1.026	0.90243	73275.8	CHAIN 1-655	-->N-glycan processing	-->cytoplasm -->endoplasmic reticulum -->endoplasmic reticulum-Golgi intermediate compartment -->extracellular exosome -->Golgi apparatus -->Golgi membrane -->integral component of membrane -->membrane	-->calcium ion binding -->mannosyl-oligosaccharide 1,2-alpha-mannosidase activity
Ribonuclease 4 <sp|Q9JJH1|RNAS4_MOUSE>	3.04675	2.94319	4.09105	2.98956	3.87218	2.95058	3.91403	1.96854	3.94814	1.94046	2.9763	3.76524	3.316 ± 0.522	3.085 ± 0.945	-1.075	0.616048	17024.6	CHAIN 1-148	-->cellular response to starvation	-->extracellular exosome -->extracellular region	-->endonuclease activity -->nucleic acid binding -->ribonuclease activity
Lysozyme C-2 <sp|P08905|LYZ2_MOUSE>	3.04675	2.94319	3.06829	3.98608	1.93609	2.95058	2.93552	2.95281	3.94814	2.91069	2.9763	2.82393	2.988 ± 0.651	3.091 ± 0.423	1.034	0.753484	16689	CHAIN 1-148	-->cytolysis -->defense response to bacterium -->defense response to Gram-negative bacterium -->defense response to Gram-positive bacterium	-->extracellular space -->extracellular vesicular exosome	-->identical protein binding -->lysozyme activity
Carbonic anhydrase 1 <sp|P13634|CAH1_MOUSE>	4.06234	8.82958	4.09105	4.98261	5.80827	7.86822	5.87104	4.92135	6.90925	5.82138	1.9842	5.64786	5.94 ± 1.997	5.193 ± 1.696	-1.144	0.500806	28330.6	CHAIN 1-261	-->one-carbon metabolic process	-->cytoplasm -->extracellular exosome	-->arylesterase activity -->carbonate dehydratase activity -->hydro-lyase activity -->zinc ion binding
Pyrethroid hydrolase Ces2e <sp|Q8BK48|EST2E_MOUSE>	0	0	0	0	0	0	1.95701	0.984271	2.96111	1.94046	0	0.941311	0 ± 0	1.464 ± 1.035	100	0.0179604	62317.7	CHAIN 1-559	-->metabolic process	-->endoplasmic reticulum -->extracellular space	-->carboxylic ester hydrolase activity
Pyrethroid hydrolase Ces2a <sp|Q8QZR3|EST2A_MOUSE>	0	0	0	0	0	0	1.95701	0.984271	1.97407	1.94046	0	0.941311	0 ± 0	1.3 ± 0.802	100	0.0106369	61940.2	CHAIN 1-558	-->protein glycosylation	-	-->carboxylic ester hydrolase activity
Cadherin-13 <sp|Q9WTR5|CAD13_MOUSE>	0	0	0	0	0	0	0	0.984271	0.987035	0	0	0	0 ± 0	0.329 ± 0.509	100	0.174688	78185.6	CHAIN 1-714	-->calcium-dependent cell-cell adhesion via plasma membrane cell adhesion molecules -->endothelial cell migration -->homophilic cell adhesion via plasma membrane adhesion molecules -->keratinocyte proliferation -->lamellipodium assembly -->localization within membrane -->low-density lipoprotein particle mediated signaling -->mitotic cell cycle -->negative regulation of cell adhesion -->negative r…	-->anchored component of membrane -->caveola -->cytoplasm -->external side of plasma membrane -->extracellular exosome -->extracellular space -->focal adhesion -->neuron projection -->perinuclear region of cytoplasm -->plasma membrane	-->adiponectin binding -->cadherin binding -->calcium ion binding -->lipoprotein particle binding -->low-density lipoprotein particle binding -->protein homodimerization activity
Transcobalamin-2 <sp|O88968|TCO2_MOUSE>	5.07792	5.88639	1.02276	0.996521	2.90413	3.93411	2.93552	2.95281	2.96111	4.85115	3.9684	0.941311	3.304 ± 2.045	3.102 ± 1.308	-1.065	0.843301	47585.8	CHAIN 1-430	-->cobalamin transport -->cobalt ion transport	-->extracellular exosome -->extracellular space	-->cobalamin binding -->metal ion binding
Lactotransferrin <sp|P08071|TRFL_MOUSE>	7.10909	6.86745	6.13658	9.96521	6.77631	6.88469	8.80656	10.827	8.88332	9.7023	16.8657	15.061	7.29 ± 1.351	11.691 ± 3.436	1.604	0.0242587	77837.8	CHAIN 1-707	-->antibacterial humoral response -->antifungal humoral response -->bone morphogenesis -->cellular iron ion homeostasis -->innate immune response in mucosa -->iron ion transport -->negative regulation of apoptotic process -->negative regulation of lipopolysaccharide-mediated signaling pathway -->negative regulation of osteoclast development -->negative regulation of single-species biofilm formati…	-->cytoplasm -->extracellular space -->extracellular vesicular exosome -->nucleus -->specific granule	-->ferric iron binding -->heparin binding -->peptidase activity -->protein serine/threonine kinase activator activity -->serine-type peptidase activity
von Willebrand factor <sp|Q8CIZ8|VWF_MOUSE>	0	1.96213	1.02276	0	0	0	1.95701	0	0.987035	1.94046	0	0	0.497 ± 0.826	0.814 ± 0.958	1.638	0.553893	309269	CHAIN 1-2813	-->blood coagulation -->cell adhesion -->cell-substrate adhesion -->hemostasis -->liver development -->placenta development -->platelet activation -->protein homooligomerization	-->endoplasmic reticulum -->external side of plasma membrane -->extracellular exosome -->extracellular matrix -->extracellular region -->extracellular space -->proteinaceous extracellular matrix -->Weibel-Palade body	-->chaperone binding -->collagen binding -->glycoprotein binding -->identical protein binding -->immunoglobulin binding -->integrin binding -->protease binding -->protein homodimerization activity -->protein N-terminus binding
Proteasome subunit beta type-5 <sp|O55234|PSB5_MOUSE>	0	0	0	0	0	0	0	1.96854	0	0.97023	0.9921	0	0 ± 0	0.655 ± 0.803	100	0.102197	28532.4	CHAIN 1-264	-->proteasome-mediated ubiquitin-dependent protein catabolic process -->response to oxidative stress	-->cytosol -->extracellular vesicular exosome -->nucleus -->proteasome core complex	-->peptidase activity -->threonine-type endopeptidase activity
L-selectin <sp|P18337|LYAM1_MOUSE>	1.01558	2.94319	1.02276	0	0	0.983527	0.978506	1.96854	0.987035	0	0.9921	1.88262	0.994 ± 1.075	1.135 ± 0.722	1.142	0.796415	42288	CHAIN 1-372	-->cell adhesion -->leukocyte migration -->response to ATP	-->external side of plasma membrane -->plasma membrane -->cell surface -->integral component of membrane	-->carbohydrate binding -->cell adhesion molecule binding -->protease binding
Coagulation factor VII <sp|P70375|FA7_MOUSE>	2.03117	2.94319	2.04553	1.99304	1.93609	3.93411	2.93552	1.96854	2.96111	1.94046	1.9842	3.76524	2.481 ± 0.806	2.593 ± 0.75	1.045	0.808381	50276.3	CHAIN 1-446	-->animal organ regeneration -->blood coagulation -->circadian rhythm -->positive regulation of blood coagulation -->positive regulation of leukocyte chemotaxis -->positive regulation of platelet-derived growth factor receptor signaling pathway -->positive regulation of positive chemotaxis -->positive regulation of protein kinase B signaling -->protein processing -->response to 2,3,7,8-tetrachlor…	-->extracellular region -->extracellular space -->serine-type peptidase complex -->vesicle	-->calcium ion binding -->receptor binding -->serine-type endopeptidase activity
Proteasome subunit beta type-2 <sp|Q9R1P3|PSB2_MOUSE>	1.01558	0	1.02276	1.99304	0.968045	0.983527	1.95701	0.984271	3.94814	0.97023	1.9842	2.82393	0.997 ± 0.631	2.111 ± 1.14	2.117	0.0703328	22906.4	CHAIN 1-201	-->proteasomal ubiquitin-independent protein catabolic process -->proteasome-mediated ubiquitin-dependent protein catabolic process -->response to organic cyclic compound -->response to organonitrogen compound	-->cytoplasm -->cytosol -->extracellular exosome -->membrane -->nucleoplasm -->nucleus -->proteasome complex -->proteasome core complex	-->endopeptidase activity -->threonine-type endopeptidase activity
H-2 class I histocompatibility antigen, K-W28 alpha chain <sp|P03991|HA1W_MOUSE>	2.03117	1.96213	1.02276	2.98956	1.93609	1.96705	0.978506	0.984271	0.987035	0.97023	0.9921	1.88262	1.985 ± 0.623	1.132 ± 0.368	-1.754	0.0200356	41103.7	CHAIN 1-368	-->antigen processing and presentation of endogenous peptide antigen via MHC class I via ER pathway, TAP-dependent -->antigen processing and presentation of exogenous peptide antigen via MHC class I -->defense response to bacterium -->immune response -->inner ear development -->negative regulation of neuron projection development -->positive regulation of T cell mediated cytotoxicity	-->Extracellular region or secreted Cytosol Plasma membrane Cytoskeleton Lysosome Endosome Peroxisome ER Golgi apparatus Nucleus Mitochondrion Manual annotation Automatic computational assertionGraphics by Christian Stolte; -->endoplasmic reticulum -->endoplasmic reticulum exit site -->integral component of lumenal side of endoplasmic reticulum membrane -->Golgi apparatus -->Golgi medial cisterna…	-->beta-2-microglobulin binding -->peptide antigen binding -->receptor binding -->TAP binding -->T cell receptor binding
Transgelin-2 <sp|Q9WVA4|TAGL2_MOUSE>	0	0	0	0	0	1.96705	0	0	0	0	0	0.941311	0.328 ± 0.803	0.157 ± 0.384	-2.089	0.652047	22395.4	CHAIN 1-199	-->epithelial cell differentiation	-->extracellular vesicular exosome	-
Proteasome subunit alpha type-3 <sp|O70435|PSA3_MOUSE>	0	0	1.02276	0	0	1.96705	0.978506	0.984271	0.987035	0	0.9921	0.941311	0.498 ± 0.828	0.814 ± 0.399	1.635	0.427273	28405.2	CHAIN 1-255	-->antigen processing and presentation of exogenous peptide antigen via MHC class I, TAP-dependent -->regulation of endopeptidase activity -->ubiquitin-dependent protein catabolic process	-->cytosol -->extracellular exosome -->nucleus -->proteasome complex -->proteasome core complex -->proteasome core complex, alpha-subunit complex	-->threonine-type endopeptidase activity
Major urinary protein 3 <sp|P04939|MUP3_MOUSE>	1.01558	1.96213	1.02276	0.996521	0.968045	1.96705	0.978506	0.984271	0.987035	1.94046	0.9921	3.76524	1.322 ± 0.498	1.608 ± 1.124	1.216	0.586927	21464.7	CHAIN 1-184	-->aerobic respiration -->cellular response to lipid -->energy reserve metabolic process -->glucose homeostasis -->heat generation -->locomotor rhythm -->mitochondrion morphogenesis -->negative regulation of gluconeogenesis -->negative regulation of insulin secretion involved in cellular response to glucose stimulus -->negative regulation of lipid biosynthetic process -->negative regulation of li…	-->cytosol -->extracellular space -->nucleus	-->insulin-activated receptor activity -->pheromone binding -->small molecule binding -->transporter activity
Liver carboxylesterase 1 <sp|Q8VCC2|EST1_MOUSE>	12.187	15.697	11.2504	9.96521	8.7124	12.7859	8.80656	10.827	8.88332	10.6725	5.9526	4.70655	11.766 ± 2.429	8.308 ± 2.491	-1.416	0.0351955	62679.9	CHAIN 1-565	-->metabolic process	-->endoplasmic reticulum	-->carboxylic ester hydrolase activity
Insulin-like growth factor-binding protein 2 <sp|P47877|IBP2_MOUSE>	3.04675	1.96213	3.06829	1.99304	3.87218	3.93411	1.95701	0	0	0	0	0.941311	2.979 ± 0.864	0.483 ± 0.814	-6.168	0.000435196	32846.7	CHAIN 1-305	-->aging -->cellular response to hormone stimulus -->female pregnancy -->positive regulation of activated T cell proliferation -->regulation of cell growth -->regulation of insulin-like growth factor receptor signaling pathway -->response to drug -->response to estradiol -->response to estrogen -->response to glucocorticoid -->response to lithium ion -->response to mechanical stimulus -->response…	-->extracellular exosome -->extracellular region -->extracellular space -->apical plasma membrane -->cytoplasmic vesicle	-->insulin-like growth factor binding -->insulin-like growth factor I binding -->insulin-like growth factor II binding
Insulin-like growth factor I <sp|P05017|IGF1_MOUSE>	1.01558	0.981065	4.09105	0	0.968045	1.96705	1.95701	5.90562	1.97407	1.94046	2.9763	2.82393	1.504 ± 1.412	2.93 ± 1.53	1.948	0.124604	17093	CHAIN 1-153	-->activation of MAPK activity -->activation of protein kinase B activity -->blood vessel remodeling -->bone mineralization involved in bone maturation -->branching morphogenesis of an epithelial tube -->cell activation -->cell development -->cell proliferation -->cellular response to amyloid-beta -->cellular response to glucose stimulus -->cellular response to insulin-like growth factor stimulus…	-->extracellular space -->insulin-like growth factor ternary complex -->alphav-beta3 integrin-IGF-1-IGF1R complex -->exocytic vesicle	-->growth factor activity -->hormone activity -->insulin-like growth factor receptor binding -->insulin receptor binding -->integrin binding
Betaine--homocysteine S-methyltransferase 1 <sp|O35490|BHMT1_MOUSE>	0	0	0	0	0	0	0.978506	4.92135	3.94814	2.91069	1.9842	1.88262	0 ± 0	2.771 ± 1.459	100	0.00557962	45020.5	CHAIN 1-407	-->amino-acid betaine catabolic process -->methionine biosynthetic process	-->cytoplasm	-->betaine-homocysteine S-methyltransferase activity -->S-adenosylmethionine-homocysteine S-methyltransferase activity -->zinc ion binding
Ig heavy chain V region AMPC1 <sp|P01803|HVM34_MOUSE>	4.06234	3.92426	4.09105	3.98608	3.87218	2.95058	2.93552	3.93708	3.94814	0	1.9842	5.64786	3.814 ± 0.431	3.075 ± 1.939	-1.24	0.40029			-	-	-
Proteasome subunit beta type-8 <sp|P28063|PSB8_MOUSE>	0	0	0	0	0	0	0	0	0.987035	0	0	0.941311	0 ± 0	0.321 ± 0.498	100	0.174838	30260.2	CHAIN 1-276	-->antigen processing and presentation -->antigen processing and presentation of exogenous peptide antigen via MHC class I, TAP-dependent -->fat cell differentiation -->proteolysis involved in cellular protein catabolic process -->regulation of endopeptidase activity	-->cytosol -->extracellular exosome -->nucleus -->proteasome complex -->proteasome core complex -->spermatoproteasome complex	-->threonine-type endopeptidase activity
Carboxypeptidase B2 <sp|Q9JHH6|CBPB2_MOUSE>	11.1714	8.82958	9.20487	8.96869	13.5526	9.83527	18.5916	15.7483	13.8185	10.6725	8.9289	11.2957	10.26 ± 1.826	13.176 ± 3.583	1.284	0.116555	48870.6	CHAIN 1-422	-->blood coagulation -->cellular response to glucose stimulus -->fibrinolysis -->liver regeneration -->negative regulation of fibrinolysis -->negative regulation of hepatocyte proliferation -->negative regulation of plasminogen activation -->positive regulation of extracellular matrix constituent secretion -->response to drug -->response to heat	-->Extracellular region or secreted Cytosol Plasma membrane Cytoskeleton Lysosome Endosome Peroxisome ER Golgi apparatus Nucleus Mitochondrion Manual annotation Automatic computational assertionGraphics by Christian Stolte; -->extracellular space -->cell	-->carboxypeptidase activity -->metallocarboxypeptidase activity -->zinc ion binding
Hyaluronan-binding protein 2 <sp|Q8K0D2|HABP2_MOUSE>	2.03117	4.90532	7.15934	2.98956	3.87218	4.91764	5.87104	4.92135	3.94814	3.88092	6.9447	5.64786	4.313 ± 1.787	5.202 ± 1.19	1.206	0.337433			-	-	-
Fatty acid-binding protein, adipocyte <sp|P04117|FABP4_MOUSE>	0	1.96213	0	0	0	0	1.95701	0.984271	0	0	0	0	0.327 ± 0.801	0.49 ± 0.819	1.498	0.734439	14649.9	CHAIN 1-132	-->brown fat cell differentiation -->cellular response to lithium ion -->cholesterol homeostasis -->cytokine production -->negative regulation of protein kinase activity -->negative regulation of transcription, DNA-templated -->positive regulation of inflammatory response -->white fat cell differentiation	-->cytoplasm -->nucleoplasm	-->lipid binding -->transporter activity
Superoxide dismutase [Cu-Zn] <sp|P08228|SODC_MOUSE>	1.01558	2.94319	1.02276	1.99304	1.93609	1.96705	0	0.984271	1.97407	0.97023	0	0.941311	1.813 ± 0.722	0.812 ± 0.74	-2.233	0.0392101	15942.7	CHAIN 1-154	-->activation of MAPK activity -->aging -->anterograde axon cargo transport -->auditory receptor cell stereocilium organization -->cell aging -->cellular iron ion homeostasis -->embryo implantation -->glutathione metabolic process -->heart contraction -->hydrogen peroxide biosynthetic process -->locomotory behavior -->muscle cell cellular homeostasis -->myeloid cell homeostasis -->negative regula…	-->cytoplasm -->cytoplasmic vesicle -->cytosol -->dendrite cytoplasm -->extracellular matrix -->extracellular space -->extracellular vesicular exosome -->mitochondrion -->neuronal cell body -->nucleus -->peroxisome -->plasma membrane -->protein complex	-->chaperone binding -->copper ion binding -->protein phosphatase 2B binding -->superoxide dismutase activity -->zinc ion binding
Pancreatic alpha-amylase <sp|P00688|AMYP_MOUSE>	3.04675	3.92426	4.09105	2.98956	3.87218	2.95058	3.91403	1.96854	2.96111	0.97023	0.9921	0.941311	3.479 ± 0.535	1.958 ± 1.247	-1.777	0.0295849	57318.3	CHAIN 1-508	-->carbohydrate catabolic process	-->extracellular space	-->alpha-amylase activity -->calcium ion binding -->chloride ion binding
Proteasome subunit beta type-6 <sp|Q60692|PSB6_MOUSE>	2.03117	0.981065	0	0.996521	0.968045	0	0	0.984271	0	0.97023	0.9921	0.941311	0.829 ± 0.76	0.648 ± 0.502	-1.279	0.637752	25378.7	CHAIN 1-238	-->proteolysis involved in cellular protein catabolic process	-->cytosol -->extracellular vesicular exosome -->nucleus -->proteasome core complex	-->threonine-type endopeptidase activity
Platelet-activating factor acetylhydrolase <sp|Q60963|PAFA_MOUSE>	4.06234	2.94319	3.06829	1.99304	2.90413	4.91764	4.89253	3.93708	3.94814	3.88092	3.9684	5.64786	3.315 ± 1.024	4.379 ± 0.731	1.321	0.067948	49258.3	CHAIN 1-440	-->inflammatory response -->lipid catabolic process -->lipid oxidation -->low-density lipoprotein particle remodeling -->plasma lipoprotein oxidation -->platelet activating factor metabolic process -->positive regulation of monocyte chemotaxis	-->low-density lipoprotein particle -->cytoplasm	-->1-alkyl-2-acetylglycerophosphocholine esterase activity -->calcium-independent phospholipase A2 activity -->phospholipid binding
NADP-dependent malic enzyme <sp|P06801|MAOX_MOUSE>	0	0	0	0	0	0	0	1.96854	1.97407	5.82138	2.9763	1.88262	0 ± 0	2.437 ± 1.92	100	0.0265551	63953.8	CHAIN 1-572	-->malate metabolic process -->protein tetramerization -->response to hormone	-->cytosol -->mitochondrion	-->malate dehydrogenase (decarboxylating) (NAD+) activity -->malate dehydrogenase (decarboxylating) (NADP+) activity -->malic enzyme activity -->manganese ion binding -->NAD binding -->oxaloacetate decarboxylase activity
Glutathione peroxidase 1 <sp|P11352|GPX1_MOUSE>	1.01558	1.96213	0	0.996521	0.968045	0	2.93552	0.984271	1.97407	4.85115	1.9842	0.941311	0.824 ± 0.74	2.278 ± 1.462	2.765	0.0641299	22329.3	CHAIN 1-201	-->aging -->angiogenesis involved in wound healing -->apoptotic process -->blood vessel endothelial cell migration -->cell proliferation -->cell redox homeostasis -->endothelial cell development -->fat cell differentiation -->glutathione metabolic process -->heart contraction -->hydrogen peroxide catabolic process -->interaction with symbiont -->intrinsic apoptotic signaling pathway in response t…	-->cytoplasm -->extracellular vesicular exosome -->mitochondrion -->nucleus	-->glutathione binding -->glutathione peroxidase activity -->phospholipid-hydroperoxide glutathione peroxidase activity -->selenium binding
Vitamin K-dependent protein S <sp|Q08761|PROS_MOUSE>	2.03117	3.92426	5.11382	1.99304	2.90413	2.95058	2.93552	2.95281	5.92221	4.85115	3.9684	1.88262	3.153 ± 1.196	3.752 ± 1.467	1.19	0.456657	74934.5	CHAIN 1-675	-->blood coagulation -->fibrinolysis	-->blood microparticle -->extracellular exosome -->extracellular space	-->calcium ion binding
MLV-related proviral Env polyprotein <sp|P10404|ENV1_MOUSE>	0	0	0	0	0	0	3.91403	4.92135	0	0.97023	1.9842	4.70655	0 ± 0	2.749 ± 2.06	100	0.0222106	69612.9	CHAIN 1-641	-->viral life cycle	-->integral component of membrane -->plasma membrane -->viral capsid -->viral envelope -->virion membrane	-->metal ion binding -->structural molecule activity
Ig heavy chain V region MOPC 47A <sp|P01786|HVM17_MOUSE>	2.03117	2.94319	2.04553	1.99304	1.93609	1.96705	2.93552	1.96854	2.96111	0	0.9921	0.941311	2.153 ± 0.389	1.633 ± 1.194	-1.318	0.349679			-	-	-
Cathepsin Z <sp|Q9WUU7|CATZ_MOUSE>	0	0	0	0.996521	0	0	0	0.984271	0	0	0.9921	0	0.166 ± 0.407	0.329 ± 0.51	1.982	0.554262	33996.2	CHAIN 1-306	-->epithelial tube branching involved in lung morphogenesis -->proteolysis involved in cellular protein catabolic process	-->endoplasmic reticulum -->extracellular exosome -->extracellular space -->intracellular membrane-bounded organelle -->lysosome	-->cysteine-type endopeptidase activity
Ig heavy chain V region 102 <sp|P01750|HVM06_MOUSE>	7.10909	8.82958	6.13658	10.9617	9.68045	7.86822	14.6776	5.90562	9.87035	0	19.842	8.4718	8.431 ± 1.758	9.795 ± 6.894	1.162	0.656283			-	-	-
Cathepsin E <sp|P70269|CATE_MOUSE>	1.01558	0.981065	1.02276	0.996521	0.968045	1.96705	0.978506	1.96854	0.987035	1.94046	2.9763	0.941311	1.159 ± 0.397	1.632 ± 0.817	1.408	0.240923	42937.7	CHAIN 1-397	-->antigen processing and presentation of exogenous peptide antigen via MHC class II -->protein autoprocessing -->protein catabolic process	-->endosome -->extracellular exosome	-->aspartic-type endopeptidase activity -->protein homodimerization activity
Cytosol aminopeptidase <sp|Q9CPY7|AMPL_MOUSE>	3.04675	2.94319	3.06829	0.996521	0.968045	0.983527	1.95701	2.95281	5.92221	8.73207	2.9763	4.70655	2.001 ± 1.116	4.541 ± 2.496	2.269	0.057411	56141.3	CHAIN 1-519	-	-->cytoplasm -->extracellular vesicular exosome -->focal adhesion -->mitochondrion -->nucleoplasm -->nucleus -->trans-Golgi network	-->aminopeptidase activity -->manganese ion binding -->metalloexopeptidase activity -->peptidase activity
Flavin reductase (NADPH) <sp|Q923D2|BLVRB_MOUSE>	5.07792	2.94319	2.04553	1.99304	2.90413	5.90116	1.95701	2.95281	2.96111	1.94046	1.9842	2.82393	3.477 ± 1.631	2.437 ± 0.524	-1.427	0.187096	22197.3	CHAIN 1-206	-->heme catabolic process	-->cytoplasm -->cytosol -->extracellular exosome -->nucleoplasm -->plasma membrane	-->biliverdin reductase activity -->riboflavin reductase (NADPH) activity
Anionic trypsin-2 <sp|P07146|TRY2_MOUSE>	5.07792	3.92426	4.09105	1.99304	2.90413	4.91764	2.93552	2.95281	2.96111	3.88092	0.9921	5.64786	3.818 ± 1.187	3.228 ± 1.517	-1.183	0.471745	26203.5	CHAIN 1-246	-->collagen catabolic process -->digestion -->proteolysis -->response to caffeine -->response to nicotine -->response to nutrient	-->extracellular region -->extracellular space	-->calcium ion binding -->serine-type endopeptidase activity
Ficolin-1 <sp|O70165|FCN1_MOUSE>	4.06234	5.88639	6.13658	6.97565	3.87218	3.93411	1.95701	3.93708	5.92221	6.79161	3.9684	2.82393	5.145 ± 1.352	4.233 ± 1.829	-1.215	0.351527	36298.5	CHAIN 1-334	-->cell surface pattern recognition receptor signaling pathway -->complement activation, lectin pathway -->G-protein coupled receptor signaling pathway -->positive regulation of interleukin-8 secretion	-->extracellular region -->extrinsic component of external side of plasma membrane -->collagen trimer	-->carbohydrate binding -->carbohydrate derivative binding -->metal ion binding -->signaling pattern recognition receptor activity
C-type lectin domain family 4 member F <sp|P70194|CLC4F_MOUSE>	0	0	0	0	0	0	0	0	0	0	0	2.82393	0 ± 0	0.471 ± 1.153	100	0.363217	61268.8	CHAIN 1-548	-->endocytosis -->NK T cell activation	-->Extracellular region or secreted Cytosol Plasma membrane Cytoskeleton Lysosome Endosome Peroxisome ER Golgi apparatus Nucleus Mitochondrion Manual annotation Automatic computational assertionGraphics by Christian Stolte; -->plasma membrane -->integral component of membrane	-->galactose binding -->glycolipid binding
Collectin-11 <sp|Q3SXB8|COL11_MOUSE>	0	0	0	0.996521	0.968045	0.983527	0.978506	0.984271	0.987035	1.94046	0.9921	0.941311	0.491 ± 0.538	1.137 ± 0.394	2.316	0.0413087	28988.9	CHAIN 1-272	-->developmental process -->multicellular organism development	-->extracellular space -->collagen trimer	-->mannose binding
Ig heavy chain V region MOPC 141 <sp|P01819|HVM43_MOUSE>	0	0	0	0	0	0	1.95701	1.96854	1.97407	0	2.9763	0.941311	0 ± 0	1.636 ± 1.028	100	0.011422			-	-	-
Ig heavy chain V region PJ14 <sp|P01820|HVM44_MOUSE>	0	0	0	0	0	0	1.95701	1.96854	1.97407	0	2.9763	0.941311	0 ± 0	1.636 ± 1.028	100	0.011422			-	-	-
Mannose-binding protein A <sp|P39039|MBL1_MOUSE>	9.14026	12.7538	12.2732	13.9513	16.4568	11.8023	12.7206	14.7641	9.87035	6.79161	9.921	11.2957	12.73 ± 2.422	10.894 ± 2.731	-1.169	0.246622	25396	CHAIN 1-239	-->complement activation, classical pathway -->complement activation, lectin pathway -->defense response to Gram-positive bacterium -->killing by host of symbiont cells -->negative regulation of growth of symbiont in host -->positive regulation of phagocytosis -->protein homotetramerization -->protein homotrimerization	-->Extracellular region or secreted Cytosol Plasma membrane Cytoskeleton Lysosome Endosome Peroxisome ER Golgi apparatus Nucleus Mitochondrion Manual annotation Automatic computational assertionGraphics by Christian Stolte; -->extracellular space -->collagen trimer	-->calcium-dependent protein binding -->calcium ion binding -->mannose binding -->phosphatidylinositol-4-phosphate binding -->polysaccharide binding -->protease binding -->protein homodimerization activity
Endoplasmin <sp|P08113|ENPL_MOUSE>	0	0	0	0	0	0	0	0	0	0.97023	0	0	0 ± 0	0.162 ± 0.396	100	0.363217	92475.8	CHAIN 1-802	-->actin rod assembly -->cellular response to ATP -->ER-associated ubiquitin-dependent protein catabolic process -->negative regulation of apoptotic process -->protein folding -->regulation of phosphoprotein phosphatase activity -->response to hypoxia	-->cytosol -->endoplasmic reticulum -->endoplasmic reticulum lumen -->endoplasmic reticulum membrane -->extracellular region -->extracellular vesicular exosome -->midbody -->nucleus -->perinuclear region of cytoplasm -->plasma membrane	-->ATP binding -->low-density lipoprotein particle receptor binding -->protein phosphatase binding -->RNA binding -->virion binding
Retinal dehydrogenase 1 <sp|P24549|AL1A1_MOUSE>	1.01558	1.96213	0	1.99304	1.93609	0.983527	0	1.96854	1.97407	2.91069	0	2.82393	1.315 ± 0.799	1.613 ± 1.312	1.227	0.647245	54467.8	CHAIN 1-501	-->9-cis-retinoic acid biosynthetic process -->embryonic eye morphogenesis -->estrous cycle phase -->kidney development -->liver development -->midgut development -->optic cup morphogenesis involved in camera-type eye development -->positive regulation of apoptotic process -->protein homotetramerization -->response to drug -->response to estradiol -->response to ethanol -->response to oxidative s…	-->cytoplasm -->nucleus	-->3-chloroallyl aldehyde dehydrogenase activity -->benzaldehyde dehydrogenase (NAD+) activity -->retinal dehydrogenase activity
Phospholipid transfer protein <sp|P55065|PLTP_MOUSE>	0	0	0	0	0	0	0	0.984271	0	0	0	0	0 ± 0	0.164 ± 0.402	100	0.363217	54453.1	CHAIN 1-493	-->ceramide transport -->flagellated sperm motility -->high-density lipoprotein particle remodeling -->lipid metabolic process -->lipid transport -->phospholipid transport -->positive regulation of cholesterol efflux -->vitamin E biosynthetic process	-->extracellular space -->high-density lipoprotein particle	-->ceramide binding -->ceramide transporter activity -->diacylglycerol binding -->lipid transporter activity -->phosphatidic acid binding -->phosphatidic acid transporter activity -->phosphatidylcholine binding -->phosphatidylcholine transporter activity -->phosphatidylethanolamine binding -->phosphatidylethanolamine transporter activity -->phosphatidylglycerol binding -->phospholipid transporter…
Bisphosphoglycerate mutase <sp|P15327|PMGE_MOUSE>	0	0	0	0	0	0	0.978506	0	0	0	0	0	0 ± 0	0.163 ± 0.399	100	0.363217	29978.2	CHAIN 1-259	-->gluconeogenesis -->glycolytic process -->regulation of pentose-phosphate shunt	-->cytosol -->extracellular exosome	-->2,3-bisphosphoglycerate-dependent phosphoglycerate mutase activity -->bisphosphoglycerate 2-phosphatase activity -->bisphosphoglycerate mutase activity
Prosaposin <sp|Q61207|SAP_MOUSE>	0	0	0	0	0	0	0.978506	0.984271	0.987035	0.97023	0.9921	0.941311	0 ± 0	0.976 ± 0.018	100	5.12191e-10	61422.1	CHAIN 1-557	-->adenylate cyclase-inhibiting G-protein coupled receptor signaling pathway -->cellular response to organic substance -->developmental growth -->epithelial cell differentiation involved in prostate gland development -->negative regulation of hydrogen peroxide-induced cell death -->positive regulation of MAPK cascade -->prostate gland growth -->regulation of lipid metabolic process -->regulation …	-->extracellular space -->extracellular vesicular exosome -->Golgi apparatus -->intracellular membrane-bounded organelle -->lysosome -->mitochondrion -->nucleolus -->nucleoplasm	-->G-protein coupled receptor binding
Epididymal secretory glutathione peroxidase <sp|P21765|GPX5_MOUSE>	0	0	0	0	0	0	2.93552	1.96854	1.97407	4.85115	1.9842	1.88262	0 ± 0	2.599 ± 1.172	100	0.00286267	25392.6	CHAIN 1-221	-->cellular response to oxidative stress	-->extracellular space -->sperm plasma membrane	-->glutathione peroxidase activity
Ras-related protein Rap-1b <sp|Q99JI6|RAP1B_MOUSE>	0	0.981065	0	0	0	2.95058	0	0	0	0	0	0	0.655 ± 1.191	0 ± 0	-100	0.235594	20824.8	CHAIN 1-184	-->cell proliferation -->cellular response to cAMP -->establishment of endothelial barrier -->metabolic process -->negative regulation of calcium ion-dependent exocytosis -->negative regulation of synaptic vesicle exocytosis -->positive regulation of ERK1 and ERK2 cascade -->Rap protein signal transduction -->regulation of cell junction assembly -->regulation of establishment of cell polarity -->…	-->cell-cell junction -->cytosol -->extracellular vesicular exosome -->intracellular -->lipid particle -->plasma membrane	-->GDP binding -->GTPase activity -->GTP binding -->protein complex binding
Cholinesterase <sp|Q03311|CHLE_MOUSE>	2.03117	3.92426	2.04553	0.996521	1.93609	3.93411	3.91403	1.96854	1.97407	0	0	0	2.478 ± 1.191	1.309 ± 1.6	-1.893	0.184257	68462.3	CHAIN 1-603	-->choline metabolic process -->learning -->negative regulation of cell proliferation -->negative regulation of synaptic transmission -->neuroblast differentiation -->response to alkaloid -->response to drug -->response to folic acid -->response to glucocorticoid	-->blood microparticle -->endoplasmic reticulum -->endoplasmic reticulum lumen -->extracellular space -->membrane -->nuclear envelope lumen	-->acetylcholinesterase activity -->choline binding -->cholinesterase activity -->identical protein binding
Lipopolysaccharide-binding protein <sp|Q61805|LBP_MOUSE>	2.03117	1.96213	3.06829	1.99304	2.90413	1.96705	2.93552	3.93708	1.97407	2.91069	2.9763	2.82393	2.321 ± 0.518	2.926 ± 0.623	1.261	0.0983297	53055.5	CHAIN 1-481	-->acute-phase response -->cellular response to lipopolysaccharide -->cellular response to lipoteichoic acid -->defense response to Gram-negative bacterium -->defense response to Gram-positive bacterium -->detection of molecule of bacterial origin -->innate immune response -->leukocyte chemotaxis involved in inflammatory response -->lipopolysaccharide-mediated signaling pathway -->lipopolysacchar…	-->extracellular exosome -->extracellular space -->cell surface -->membrane	-->lipopeptide binding -->lipopolysaccharide binding -->lipoteichoic acid binding -->receptor binding
Apolipoprotein E <sp|P08226|APOE_MOUSE>	1.01558	0	2.04553	1.99304	1.93609	0.983527	4.89253	2.95281	4.93518	1.94046	1.9842	4.70655	1.329 ± 0.813	3.569 ± 1.446	2.685	0.0109914	35866.6	CHAIN 1-311	-->aging -->artery morphogenesis -->cardiovascular system development -->cellular calcium ion homeostasis -->cellular response to cholesterol -->cellular response to growth factor stimulus -->cellular response to interleukin-1 -->cGMP-mediated signaling -->cholesterol catabolic process -->cholesterol efflux -->cholesterol homeostasis -->cholesterol metabolic process -->chylomicron remnant clearan…	-->blood microparticle -->chylomicron -->cytosol -->dendrite -->extracellular region -->extracellular space -->extracellular vesicular exosome -->extrinsic component of external side of plasma membrane -->Golgi apparatus -->high-density lipoprotein particle -->intermediate-density lipoprotein particle -->late endosome -->low-density lipoprotein particle -->neuronal cell body -->nucleus	-->antioxidant activity -->beta-amyloid binding -->cholesterol transporter activity -->heparin binding -->hydroxyapatite binding -->lipoprotein particle binding -->metal chelating activity -->phosphatidylcholine-sterol O-acyltransferase activator activity -->phospholipid binding
Monocyte differentiation antigen CD14 <sp|P10810|CD14_MOUSE>	0	0	0	0	0	0	0	0	0	0.97023	0	0	0 ± 0	0.162 ± 0.396	100	0.363217	39203.9	CHAIN 1-366	-->cellular response to lipopolysaccharide -->cellular response to lipoteichoic acid -->inflammatory response -->innate immune response -->positive regulation of cytokine secretion -->positive regulation of endocytosis -->positive regulation of tumor necrosis factor production -->positive regulation of type I interferon production -->receptor-mediated endocytosis -->response to electrical stimulu…	-->anchored component of membrane -->cell surface -->extracellular space -->extracellular vesicular exosome -->membrane raft -->plasma membrane	-->lipopolysaccharide binding -->lipoteichoic acid binding
Proteasome subunit beta type-1 <sp|O09061|PSB1_MOUSE>	0	0	0	0	0	0	0.978506	1.96854	0.987035	4.85115	0	1.88262	0 ± 0	1.778 ± 1.668	100	0.0476477	26372.2	CHAIN 1-240	-->proteolysis involved in cellular protein catabolic process	-->cytosol -->extracellular vesicular exosome -->nucleus -->proteasome complex -->proteasome core complex	-->threonine-type endopeptidase activity
Proteasome subunit alpha type-4 <sp|Q9R1P0|PSA4_MOUSE>	0	0	0	0	0	0	0.978506	0.984271	0	0.97023	1.9842	0.941311	0 ± 0	0.976 ± 0.628	100	0.0125001	29470.8	CHAIN 1-261	-->ubiquitin-dependent protein catabolic process	-->cytoplasmic mRNA processing body -->cytosol -->extracellular vesicular exosome -->nucleus -->proteasome core complex -->proteasome core complex, alpha-subunit complex	-->threonine-type endopeptidase activity
Proteoglycan 4 <sp|Q9JM99|PRG4_MOUSE>	1.01558	0.981065	1.02276	0.996521	0.968045	0	1.95701	0.984271	0.987035	0.97023	1.9842	1.88262	0.831 ± 0.407	1.461 ± 0.527	1.758	0.044577	115996	CHAIN 1-1054	-->hematopoietic stem cell proliferation -->immune response -->negative regulation of interleukin-6 biosynthetic process -->regulation of cell proliferation	-->extracellular space	-->polysaccharide binding -->scavenger receptor activity
Peptidyl-prolyl cis-trans isomerase A <sp|P17742|PPIA_MOUSE>	3.04675	3.92426	2.04553	1.99304	4.84022	3.93411	3.91403	2.95281	3.94814	3.88092	1.9842	2.82393	3.297 ± 1.141	3.251 ± 0.8	-1.014	0.93645	17971.3	CHAIN 1-164	-->negative regulation of protein phosphatase type 2B activity -->protein folding -->protein peptidyl-prolyl isomerization -->regulation of viral genome replication	-->cytosol -->extracellular region -->nucleus	-->cyclosporin A binding -->peptidyl-prolyl cis-trans isomerase activity
Peroxiredoxin-6 <sp|O08709|PRDX6_MOUSE>	1.01558	0.981065	0	0.996521	0.968045	0.983527	0	0.984271	0.987035	0.97023	0	0.941311	0.824 ± 0.404	0.647 ± 0.502	-1.274	0.516806	24870.7	CHAIN 1-224	-->bleb assembly -->lipid catabolic process -->response to reactive oxygen species	-->cytoplasmic vesicle -->cytosol -->lysosome -->mitochondrion	-->glutathione peroxidase activity -->hydrolase activity -->peroxidase activity -->peroxiredoxin activity
Ig kappa chain V-VI region NQ2-48.2.2 <sp|P04941|KV6A7_MOUSE>	3.04675	4.90532	2.04553	0.996521	2.90413	1.96705	4.89253	1.96854	2.96111	0	1.9842	2.82393	2.644 ± 1.332	2.438 ± 1.601	-1.084	0.813781			-	-	-
Ig kappa chain V-VI region NQ2-17.4.1 <sp|P04940|KV6A6_MOUSE>	3.04675	4.90532	2.04553	0.996521	2.90413	1.96705	4.89253	1.96854	2.96111	0	1.9842	2.82393	2.644 ± 1.332	2.438 ± 1.601	-1.084	0.813781			-	-	-
Ig kappa chain V-VI region NQ5-78.2.6 <sp|P04944|KV6AA_MOUSE>	0	0	0	0	0	0	4.89253	1.96854	2.96111	0	1.9842	2.82393	0 ± 0	2.438 ± 1.601	100	0.0135646			-	-	-
Regenerating islet-derived protein 3-beta <sp|P35230|REG3B_MOUSE>	0	0	0	0	0	0	0.978506	0	0	1.94046	0	0	0 ± 0	0.486 ± 0.813	100	0.202496	19476.2	CHAIN 1-175	-->acute-phase response -->defense response to Gram-negative bacterium -->defense response to Gram-positive bacterium	-->extracellular region	-->carbohydrate binding -->identical protein binding
Ig heavy chain V region 36-60 <sp|P01823|HVM47_MOUSE>	0	0	0	0.996521	0	0	0.978506	0	0.987035	0	0	0	0.166 ± 0.407	0.328 ± 0.508	1.976	0.557242			-	-	-
Ig lambda-1 chain V region <sp|P01723|LV1A_MOUSE>	1.01558	2.94319	2.04553	2.98956	1.93609	1.96705	2.93552	2.95281	2.96111	0	2.9763	3.76524	2.15 ± 0.736	2.598 ± 1.314	1.208	0.486367	12221.7	CHAIN 1-117	-	-->plasma membrane	-->antigen binding
Ig lambda-1 chain V region S43 <sp|P01727|LV1E_MOUSE>	1.01558	2.94319	2.04553	2.98956	1.93609	1.96705	2.93552	2.95281	2.96111	0	2.9763	3.76524	2.15 ± 0.736	2.598 ± 1.314	1.208	0.486367	13529.3	CHAIN 1-129	-	-	-->antigen binding
Ig lambda-2 chain V region <sp|P01728|LV2A_MOUSE>	1.01558	2.94319	1.02276	1.99304	1.93609	3.93411	1.95701	3.93708	2.96111	0	1.9842	3.76524	2.141 ± 1.135	2.434 ± 1.46	1.137	0.706303	12221.8	CHAIN 1-117	-->immune response -->immunoglobulin production	-->extracellular space	-->antigen binding
Ig heavy chain V region AC38 15.3 <sp|P06329|HVM50_MOUSE>	3.04675	1.96213	2.04553	2.98956	2.90413	3.93411	3.91403	1.96854	3.94814	0	5.9526	1.88262	2.814 ± 0.73	2.944 ± 2.085	1.046	0.889453			-	-	-
Chymotrypsin-like elastase family member 1 <sp|Q91X79|CELA1_MOUSE>	2.03117	0.981065	2.04553	1.99304	0.968045	0.983527	1.95701	0.984271	0.987035	0.97023	1.9842	0.941311	1.5 ± 0.573	1.304 ± 0.517	-1.15	0.547081	28900.6	CHAIN 1-266	-->digestive system development -->elastin catabolic process -->exocrine pancreas development -->inflammatory response -->multicellular organism growth -->negative regulation of transcription from RNA polymerase II promoter -->pancreas morphogenesis -->positive regulation of angiogenesis -->positive regulation of transcription from RNA polymerase II promoter -->post-embryonic development -->prote…	-->extracellular space	-->metal ion binding -->serine-type endopeptidase activity
Fibulin-1 <sp|Q08879|FBLN1_MOUSE>	1.01558	1.96213	1.02276	0	0.968045	0.983527	0	0.984271	0.987035	3.88092	1.9842	0	0.992 ± 0.621	1.306 ± 1.463	1.317	0.643736	78032.8	CHAIN 1-705	-->blood coagulation, fibrin clot formation -->embryo implantation -->extracellular matrix organization -->negative regulation of cell adhesion -->negative regulation of cell motility -->negative regulation of ERK1 and ERK2 cascade -->negative regulation of protein phosphorylation -->negative regulation of stem cell proliferation -->negative regulation of substrate adhesion-dependent cell spreadi…	-->basement membrane -->elastic fiber -->extracellular exosome -->extracellular space -->fibrinogen complex -->proteinaceous extracellular matrix	-->calcium ion binding -->extracellular matrix structural constituent -->fibrinogen binding -->fibronectin binding -->identical protein binding -->integrin binding -->peptidase activator activity -->protein complex binding -->protein C-terminus binding
Transitional endoplasmic reticulum ATPase <sp|Q01853|TERA_MOUSE>	1.01558	0	0	0	0	1.96705	0	0	0	0	0	0	0.497 ± 0.827	0 ± 0	-100	0.200812	89321.8	CHAIN 1-806	-->activation of cysteine-type endopeptidase activity involved in apoptotic process -->aggresome assembly -->cellular response to DNA damage stimulus -->double-strand break repair -->ER-associated ubiquitin-dependent protein catabolic process -->ER to Golgi vesicle-mediated transport -->positive regulation of Lys63-specific deubiquitinase activity -->positive regulation of proteasomal ubiquitin-d…	-->cytosol -->endoplasmic reticulum -->extracellular vesicular exosome -->Hrd1p ubiquitin ligase complex -->lipid particle -->nucleus -->perinuclear region of cytoplasm -->proteasome complex -->protein complex -->site of double-strand break	-->ADP binding -->ATPase activity -->ATP binding -->deubiquitinase activator activity -->lipid binding -->poly(A) RNA binding -->polyubiquitin binding
Coagulation factor XI <sp|Q91Y47|FA11_MOUSE>	0	0	0	0	0	0	0.978506	0	0.987035	0	0	0	0 ± 0	0.328 ± 0.508	100	0.174693			-	-	-
Vascular cell adhesion protein 1 <sp|P29533|VCAM1_MOUSE>	5.07792	1.96213	2.04553	1.99304	1.93609	1.96705	4.89253	4.92135	1.97407	2.91069	3.9684	2.82393	2.497 ± 1.265	3.582 ± 1.206	1.435	0.159419	81317.5	CHAIN 1-739	-->amine metabolic process -->calcium-mediated signaling using intracellular calcium source -->cell adhesion -->cell-matrix adhesion -->cellular response to glucose stimulus -->chorio-allantoic fusion -->embryonic placenta morphogenesis -->heart development -->heterophilic cell-cell adhesion via plasma membrane cell adhesion molecules -->leukocyte cell-cell adhesion -->leukocyte tethering or roll…	-->podosome -->endoplasmic reticulum -->early endosome -->extracellular exosome -->extracellular space -->Golgi apparatus -->alpha9-beta1 integrin-vascular cell adhesion molecule-1 complex -->external side of plasma membrane -->anchored component of membrane -->apical part of cell -->cell periphery -->cell surface -->filopodium -->integral component of membrane -->microvillus	-->cell adhesion molecule binding -->integrin binding -->primary amine oxidase activity
Melanotransferrin <sp|Q9R0R1|TRFM_MOUSE>	3.04675	1.96213	2.04553	0.996521	0.968045	1.96705	2.93552	1.96854	0.987035	0.97023	1.9842	1.88262	1.831 ± 0.775	1.788 ± 0.736	-1.024	0.92346			-	-	-
Insulin-like growth factor-binding protein 3 <sp|P47878|IBP3_MOUSE>	2.03117	0.981065	1.02276	0.996521	0	1.96705	1.95701	0.984271	0.987035	0	0.9921	0.941311	1.166 ± 0.753	0.977 ± 0.619	-1.193	0.644553	31686.9	CHAIN 1-292	-->negative regulation of cell proliferation -->negative regulation of protein phosphorylation -->negative regulation of smooth muscle cell migration -->negative regulation of smooth muscle cell proliferation -->osteoblast differentiation -->positive regulation of apoptotic process -->positive regulation of insulin-like growth factor receptor signaling pathway -->positive regulation of MAPK casca…	-->extracellular exosome -->extracellular space -->insulin-like growth factor ternary complex -->nucleus	-->fibronectin binding -->insulin-like growth factor binding -->insulin-like growth factor I binding -->insulin-like growth factor II binding -->protein tyrosine phosphatase activator activity
Kidney androgen-regulated protein <sp|P61110|ANRE_MOUSE>	0	0.981065	0	0	0.968045	0	0.978506	0.984271	0.987035	0.97023	0	1.88262	0.325 ± 0.503	0.967 ± 0.596	2.975	0.0720831			-	-	-
Hepatic triacylglycerol lipase <sp|P27656|LIPC_MOUSE>	0	0	0	0	0	0	0.978506	0	0.987035	0	0	0.941311	0 ± 0	0.484 ± 0.531	100	0.0756759	57388.9	CHAIN 1-510	-->cholesterol homeostasis -->cholesterol metabolic process -->cholesterol transport -->fatty acid biosynthetic process -->high-density lipoprotein particle remodeling -->low-density lipoprotein particle remodeling -->triglyceride catabolic process -->triglyceride homeostasis -->very-low-density lipoprotein particle remodeling	-->extracellular space -->high-density lipoprotein particle	-->heparin binding -->lipase activity -->triglyceride lipase activity
Intercellular adhesion molecule 1 <sp|P13597|ICAM1_MOUSE>	1.01558	0.981065	0	0.996521	0	0	0	0	0	0.97023	0	0	0.499 ± 0.547	0.162 ± 0.396	-3.08	0.251833	58844.3	CHAIN 1-537	-->acute inflammatory response to antigenic stimulus -->adhesion of symbiont to host -->cell adhesion -->cell adhesion mediated by integrin -->cell aging -->cellular response to alkaloid -->cellular response to dexamethasone stimulus -->cellular response to glucose stimulus -->cellular response to hypoxia -->cellular response to interferon-gamma -->cellular response to interleukin-1 -->cellular r…	-->extracellular exosome -->extracellular matrix -->extracellular space -->external side of plasma membrane -->immunological synapse -->integral component of plasma membrane -->cell surface -->focal adhesion -->membrane	-->integrin binding
Talin-1 <sp|P26039|TLN1_MOUSE>	0	0	0	0	0.968045	5.90116	0	0	0	0	0	0	1.145 ± 2.362	0 ± 0	-100	0.288455	269821	CHAIN 1-2541	-->cell adhesion -->cell-substrate junction assembly -->cortical actin cytoskeleton organization -->cytoskeletal anchoring at plasma membrane	-->actin cytoskeleton -->cytoplasm -->extracellular vesicular exosome -->focal adhesion -->microtubule organizing center -->plasma membrane -->ruffle	-->structural constituent of cytoskeleton
Sorbitol dehydrogenase <sp|Q64442|DHSO_MOUSE>	0	0	0	0	0	0	0	1.96854	0.987035	3.88092	0	2.82393	0 ± 0	1.61 ± 1.57	100	0.0537432	38249.4	CHAIN 1-357	-->fructose biosynthetic process -->L-xylitol catabolic process -->sorbitol catabolic process -->sorbitol metabolic process -->sperm motility	-->extracellular vesicular exosome -->membrane -->mitochondrion -->motile cilium	-->L-iditol 2-dehydrogenase activity -->NAD binding -->zinc ion binding
Proteasome subunit beta type-7 <sp|P70195|PSB7_MOUSE>	0	0	0	0	0	0	0	0	0	0	0	1.88262	0 ± 0	0.314 ± 0.769	100	0.363217	29891.4	CHAIN 1-277	-->proteolysis involved in cellular protein catabolic process	-->cytoplasm -->cytosol -->extracellular vesicular exosome -->microtubule cytoskeleton -->nucleoplasm -->nucleus -->proteasome complex -->proteasome core complex	-->threonine-type endopeptidase activity
Apolipoprotein F <sp|Q91V80|APOF_MOUSE>	0	0	0	0	0	0	0	0	0	0	1.9842	1.88262	0 ± 0	0.644 ± 0.999	100	0.174872	34359.3	CHAIN 1-315	-->cholesterol efflux -->cholesterol metabolic process -->triglyceride metabolic process	-->extracellular space -->high-density lipoprotein particle -->low-density lipoprotein particle	-
Proteasome subunit beta type-10 <sp|O35955|PSB10_MOUSE>	0	0	0	0	0	0	0	0.984271	0.987035	0	0.9921	0	0 ± 0	0.494 ± 0.541	100	0.0755891	29063.2	CHAIN 1-273	-->cell morphogenesis -->proteolysis involved in cellular protein catabolic process -->T cell proliferation	-->Extracellular region or secreted Cytosol Plasma membrane Cytoskeleton Lysosome Endosome Peroxisome ER Golgi apparatus Nucleus Mitochondrion Manual annotation Automatic computational assertionGraphics by Christian Stolte; -->cytosol -->nucleoplasm -->proteasome core complex -->proteasome core complex, beta-subunit complex -->spermatoproteasome complex	-->threonine-type endopeptidase activity
Ig heavy chain V region MOPC 315 <sp|P01822|HVM46_MOUSE>	0	0	0	0	0	0	2.93552	0.984271	1.97407	0	0.9921	0.941311	0 ± 0	1.305 ± 1.014	100	0.0253521			-	-	-
Carboxylesterase 3A <sp|Q63880|EST3A_MOUSE>	0	0	0	0.996521	0	0	0.978506	0	0.987035	0	0	0.941311	0.166 ± 0.407	0.484 ± 0.531	2.916	0.272463	63317.7	CHAIN 1-571	-->metabolic process	-->endoplasmic reticulum	-->carboxylic ester hydrolase activity
Collagen alpha-1(I) chain <sp|P11087|CO1A1_MOUSE>	0	0	0	0	0	0	0.978506	0	0.987035	0	0.9921	0.941311	0 ± 0	0.65 ± 0.504	100	0.0250866	138032	CHAIN 1-1453	-->blood vessel development -->bone trabecula formation -->cartilage development involved in endochondral bone morphogenesis -->cellular response to amino acid stimulus -->cellular response to mechanical stimulus -->cellular response to retinoic acid -->cellular response to transforming growth factor beta stimulus -->collagen biosynthetic process -->collagen fibril organization -->embryonic skele…	-->collagen trimer -->collagen type I trimer -->cytoplasm -->extracellular matrix -->extracellular space -->proteinaceous extracellular matrix	-->extracellular matrix structural constituent -->metal ion binding
Apolipoprotein A-V <sp|Q8C7G5|APOA5_MOUSE>	0	0	0	0	0	0	1.95701	0	0	0	0.9921	0.941311	0 ± 0	0.648 ± 0.797	100	0.102948	41262.2	CHAIN 1-368	-->acylglycerol homeostasis -->cholesterol biosynthetic process -->cholesterol efflux -->cholesterol homeostasis -->high-density lipoprotein particle assembly -->lipid transport -->lipoprotein metabolic process -->neuron projection regeneration -->phosphatidylcholine metabolic process -->phospholipid efflux -->positive regulation of cholesterol esterification -->positive regulation of fatty acid …	-->cytosol -->blood microparticle -->chylomicron -->extracellular region -->extracellular space -->high-density lipoprotein particle -->very-low-density lipoprotein particle	-->cholesterol binding -->cholesterol transporter activity -->enzyme activator activity -->enzyme binding -->heparin binding -->lipase activator activity -->lipase binding -->lipid binding -->lipoprotein lipase activator activity -->lipoprotein particle receptor binding -->low-density lipoprotein particle receptor binding -->phosphatidylcholine binding -->phosphatidylcholine-sterol O-acyltransfer…
NADH dehydrogenase [ubiquinone] flavoprotein 1, mitochondrial <sp|Q91YT0|NDUV1_MOUSE>	0	0	0	0	0	0	0.978506	0.984271	0.987035	0.97023	0.9921	0.941311	0 ± 0	0.976 ± 0.018	100	5.12191e-10	50834.2	CHAIN 1-464	-->mitochondrial ATP synthesis coupled electron transport	-->cytosol -->mitochondrial inner membrane -->mitochondrial respiratory chain complex I -->mitochondrion	-->4 iron, 4 sulfur cluster binding -->FMN binding -->metal ion binding -->NAD binding -->NADH dehydrogenase (ubiquinone) activity
C-type lectin domain family 11 member A <sp|O88200|CLC11_MOUSE>	0	0	0	0	0.968045	0.983527	0	0.984271	0	0.97023	0	0.941311	0.325 ± 0.504	0.483 ± 0.529	1.486	0.609249	36451.4	CHAIN 1-328	-->ossification -->positive regulation of cell proliferation	-->extracellular region -->extracellular space -->cytoplasm	-->carbohydrate binding -->growth factor activity
Immunoglobulin-like and fibronectin type III domain-containing protein 1 <sp|Q3KNY0|IGFN1_MOUSE>	2.03117	1.96213	2.04553	1.99304	1.93609	1.96705	1.95701	1.96854	1.97407	1.94046	2.9763	1.88262	1.989 ± 0.042	2.117 ± 0.423	1.064	0.494991	303658	CHAIN 1-2849	-	-->nucleus -->Z disc	-
Myoglobin <sp|P04247|MYG_MOUSE>	0	0	0	0	0	0	3.91403	0.984271	0.987035	0	0	0	0 ± 0	0.981 ± 1.516	100	0.173825	17069.7	CHAIN 1-154	-->brown fat cell differentiation -->enucleate erythrocyte differentiation -->heart development -->response to hormone -->response to hydrogen peroxide -->response to hypoxia -->slow-twitch skeletal muscle fiber contraction	-->extracellular exosome	-->heme binding -->metal ion binding -->oxygen binding -->oxygen carrier activity
Peroxiredoxin-1 <sp|P35700|PRDX1_MOUSE>	0	0	0	0	0	0	0.978506	2.95281	0.987035	0.97023	0.9921	0.941311	0 ± 0	1.304 ± 0.808	100	0.0108336	22176.5	CHAIN 1-199	-->cell proliferation -->erythrocyte homeostasis -->hydrogen peroxide catabolic process -->natural killer cell mediated cytotoxicity -->regulation of NF-kappaB import into nucleus -->regulation of stress-activated MAPK cascade -->removal of superoxide radicals -->response to oxidative stress -->response to reactive oxygen species -->retina homeostasis	-->cytosol -->extracellular space -->extracellular vesicular exosome -->mitochondrial matrix -->mitochondrion -->nuclear euchromatin -->nucleolus -->peroxisomal matrix	-->heme binding -->identical protein binding -->poly(A) RNA binding -->thioredoxin peroxidase activity
Angiopoietin-related protein 3 <sp|Q9R182|ANGL3_MOUSE>	0	0	0	0.996521	0.968045	0	0	0.984271	1.97407	0	0	0	0.327 ± 0.507	0.493 ± 0.825	1.508	0.686039	52543.1	CHAIN 1-455	-->acylglycerol homeostasis -->angiogenesis -->artery morphogenesis -->cell-matrix adhesion -->cholesterol homeostasis -->cholesterol metabolic process -->fatty acid metabolic process -->glycerol metabolic process -->lipid homeostasis -->lipid storage -->negative regulation of lipoprotein lipase activity -->negative regulation of phospholipase activity -->phospholipid catabolic process -->phospho…	-->early endosome -->extracellular region -->extracellular space -->Golgi apparatus -->cell surface -->lamellipodium	-->enzyme inhibitor activity -->growth factor activity -->heparin binding -->integrin binding -->phospholipase inhibitor activity
Insulin-like growth factor-binding protein 4 <sp|P47879|IBP4_MOUSE>	0	0	0	0	0	0	0.978506	0.984271	0.987035	1.94046	0	0.941311	0 ± 0	0.972 ± 0.614	100	0.0116612			-	-	-
Vasorin <sp|Q9CZT5|VASN_MOUSE>	0	0	0	0	0.968045	0	0	0	0.987035	0	0	0	0.161 ± 0.395	0.165 ± 0.403	1.025	0.989311	72261.3	CHAIN 1-673	-->cell surface receptor signaling pathway -->cellular response to hypoxia -->cellular response to redox state -->negative regulation of epithelial to mesenchymal transition -->negative regulation of transforming growth factor beta receptor signaling pathway	-->extracellular exosome -->extracellular space -->lysosomal membrane -->mitochondrion -->plasma membrane -->cell surface -->integral component of membrane	-->cadherin binding -->transforming growth factor beta binding
Matrix metalloproteinase-21 <sp|Q8K3F2|MMP21_MOUSE>	0	0	0	0	0	0	0.978506	0.984271	0.987035	0.97023	0.9921	0.941311	0 ± 0	0.976 ± 0.018	100	5.12191e-10			-	-	-
Carboxylesterase 4A <sp|Q8R0W5|EST4A_MOUSE>	0	0	0	0	0	0	0.978506	0.984271	0.987035	0.97023	0.9921	0.941311	0 ± 0	0.976 ± 0.018	100	5.12191e-10			-	-	-
Centrosomal protein of 131 kDa <sp|Q62036|CP131_MOUSE>	0	0	0	0	0	0	2.93552	2.95281	3.94814	2.91069	2.9763	2.82393	0 ± 0	3.091 ± 0.423	100	9.99832e-06			-	-	-
Nucleobindin-1 <sp|Q02819|NUCB1_MOUSE>	0	0	0	0	0	0	0	0	0	0	0.9921	0.941311	0 ± 0	0.322 ± 0.499	100	0.174872	53408.7	CHAIN 1-459	-->regulation of protein targeting -->response to cisplatin	-->cis-Golgi network -->early endosome -->endoplasmic reticulum-Golgi intermediate compartment -->extracellular exosome -->extracellular space -->extrinsic component of Golgi membrane -->Golgi apparatus -->Golgi-associated vesicle -->Golgi cisterna membrane -->lumenal side of Golgi membrane -->membrane -->microtubule cytoskeleton -->nucleus -->rough endoplasmic reticulum -->trans-Golgi network	-->calcium ion binding -->DNA binding
Periostin <sp|Q62009|POSTN_MOUSE>	0	0	0	0	0	0	0.978506	0	0	0	0	0	0 ± 0	0.163 ± 0.399	100	0.363217	93143.6	CHAIN 1-838	-->bone regeneration -->cell adhesion -->cellular response to fibroblast growth factor stimulus -->cellular response to transforming growth factor beta stimulus -->cellular response to tumor necrosis factor -->cellular response to vitamin K -->extracellular matrix organization -->negative regulation of cell-matrix adhesion -->negative regulation of substrate adhesion-dependent cell spreading -->n…	-->extracellular matrix -->extracellular space -->neuromuscular junction -->proteinaceous extracellular matrix -->trans-Golgi network	-->cell adhesion molecule binding -->heparin binding -->metal ion binding
Proteasome subunit alpha type-2 <sp|P49722|PSA2_MOUSE>	0	0	0	0	0	0	0	0.984271	0.987035	3.88092	0.9921	0.941311	0 ± 0	1.298 ± 1.325	100	0.0616469	25926.6	CHAIN 1-234	-->response to virus -->ubiquitin-dependent protein catabolic process	-->cytoplasmic mRNA processing body -->cytosol -->extracellular vesicular exosome -->nucleus -->proteasome core complex -->proteasome core complex, alpha-subunit complex	-->threonine-type endopeptidase activity
Interferon regulatory factor 1 <sp|P15314|IRF1_MOUSE>	4.06234	0.981065	1.02276	0.996521	2.90413	2.95058	0.978506	0.984271	0.987035	0.97023	0.9921	0.941311	2.153 ± 1.329	0.976 ± 0.018	-2.206	0.0821887			-	-	-
Alcohol dehydrogenase 1 <sp|P00329|ADH1_MOUSE>	0	0	0	0	0	0	0	0.984271	0	0.97023	0	0	0 ± 0	0.326 ± 0.505	100	0.174702	39771.4	CHAIN 1-375	-->behavioral response to ethanol -->ethanol catabolic process -->response to retinoic acid -->response to steroid hormone -->response to testosterone -->retinoic acid metabolic process -->retinoid metabolic process -->retinol metabolic process	-->intracellular -->mitochondrion	-->alcohol dehydrogenase (NAD) activity -->protein homodimerization activity -->zinc ion binding
Immunoglobulin superfamily member 10 <sp|Q3V1M1|IGS10_MOUSE>	0	0.981065	1.02276	0	0.968045	0.983527	0	0.984271	0.987035	0	0	0	0.659 ± 0.511	0.329 ± 0.509	-2.003	0.287635	285598	CHAIN 1-2594	-->ossification	-->extracellular region	-
Ran GTPase-activating protein 1 <sp|P46061|RAGP1_MOUSE>	0	0	0	0	0	0	0	0.984271	0.987035	0.97023	0.9921	0.941311	0 ± 0	0.812 ± 0.398	100	0.00412338	63531	CHAIN 1-589	-->cellular response to vasopressin -->negative regulation of protein export from nucleus -->response to axon injury -->signal transduction	-->axon cytoplasm -->condensed chromosome kinetochore -->cytoplasm -->cytoplasmic periphery of the nuclear pore complex -->cytosol -->dendrite -->intracellular membrane-bounded organelle -->mitotic spindle -->nuclear membrane -->nuclear pore cytoplasmic filaments -->perinuclear region of cytoplasm	-->GTPase activator activity
1-phosphatidylinositol 4,5-bisphosphate phosphodiesterase eta-1 <sp|Q4KWH5|PLCH1_MOUSE>	1.01558	0	0	0.996521	0	0	0	0	0	0	0	0	0.335 ± 0.52	0 ± 0	-100	0.174712	187743	CHAIN 1-1682	-->lipid catabolic process -->phosphatidylinositol-mediated signaling	-->cytoplasm -->cytosol -->intracellular membrane-bounded organelle -->membrane	-->calcium-dependent phospholipase C activity -->calcium ion binding -->phosphatidylinositol phospholipase C activity -->signal transducer activity
Protein BCAP <sp|Q9D478|ODF2L_MOUSE>	0	0	0	0	0	0	0	0	0	0	0	0.941311	0 ± 0	0.157 ± 0.384	100	0.363217	74150.5	CHAIN 1-642	-	-->centrosome	-
Rab11 family-interacting protein 3 <sp|Q8CHD8|RFIP3_MOUSE>	0	0	0	0	0	0	0	0	0	0	0	0.941311	0 ± 0	0.157 ± 0.384	100	0.363217	118535	CHAIN 1-1047	-->cytokinesis -->endocytic recycling -->negative regulation of adiponectin secretion -->protein localization to cilium	-->centrosome -->cleavage furrow -->endosome -->intercellular bridge -->intracellular membrane-bounded organelle -->membrane -->microtubule organizing center -->midbody -->nucleoplasm -->recycling endosome -->recycling endosome membrane	-->ADP-ribosylation factor binding -->calcium ion binding -->dynein light intermediate chain binding -->protein homodimerization activity -->Rab GTPase binding
Cytosolic carboxypeptidase 4 <sp|Q09M05|CBPC4_MOUSE>	0	0	0	0	0	0	0	0	0	0	0	0.941311	0 ± 0	0.157 ± 0.384	100	0.363217	109368	CHAIN 1-972	-->C-terminal protein deglutamylation -->protein side chain deglutamylation	-->cytosol	-->metallocarboxypeptidase activity -->tubulin binding -->zinc ion binding
Ataxin-1-like <sp|P0C7T6|ATX1L_MOUSE>	0	0	0	0	0	0	0.978506	0.984271	0.987035	1.94046	0.9921	0.941311	0 ± 0	1.137 ± 0.394	100	0.00087437			-	-	-
Collagen alpha-1(XXIV) chain <sp|Q30D77|COOA1_MOUSE>	0	0	0	0	0	0	0.978506	0.984271	1.97407	0.97023	0.9921	0.941311	0 ± 0	1.14 ± 0.409	100	0.00102714	175733	CHAIN 1-1733	-->hematopoietic progenitor cell differentiation	-->collagen trimer -->proteinaceous extracellular matrix	-->extracellular matrix structural constituent
Creatine kinase B-type <sp|Q04447|KCRB_MOUSE>	0	0	0	0	0	0	0.978506	0	0	0	0	0	0 ± 0	0.163 ± 0.399	100	0.363217	42713.3	CHAIN 1-381	-->cellular chloride ion homeostasis -->substantia nigra development	-->extracellular vesicular exosome -->mitochondrion	-->ATP binding -->creatine kinase activity
Collagen alpha-2(V) chain <sp|Q3U962|CO5A2_MOUSE>	0	0	0	0	0	0	0	0	0	0.97023	0	0	0 ± 0	0.162 ± 0.396	100	0.363217	145018	CHAIN 1-1497	-->cellular response to amino acid stimulus -->collagen fibril organization -->eye morphogenesis -->negative regulation of endodermal cell differentiation -->ossification -->skeletal system development -->skin development	-->collagen trimer -->collagen type V trimer -->extracellular matrix	-->extracellular matrix structural constituent -->metal ion binding -->SMAD binding
Pentatricopeptide repeat domain-containing protein 3, mitochondrial <sp|Q14C51|PTCD3_MOUSE>	1.01558	1.96213	1.02276	0.996521	0	1.96705	1.95701	1.96854	1.97407	1.94046	0.9921	0.941311	1.161 ± 0.736	1.629 ± 0.513	1.403	0.233297	77796.2	CHAIN 1-685	-->mitochondrial translation -->regulation of translation	-->cytosol -->mitochondrion -->nucleoplasm -->plasma membrane -->ribosome	-->ribosomal small subunit binding -->RNA binding -->rRNA binding
Zonadhesin <sp|O88799|ZAN_MOUSE>	0	0	0	0	0	0	1.95701	2.95281	1.97407	0.97023	1.9842	1.88262	0 ± 0	1.953 ± 0.628	100	0.000618935			-	-	-
ATP-binding cassette sub-family A member 13 <sp|Q5SSE9|ABCAD_MOUSE>	0	0	0	0	0	0	2.93552	1.96854	1.97407	0.97023	1.9842	1.88262	0 ± 0	1.953 ± 0.623	100	0.000595669	568897	CHAIN 1-5034	-->cholesterol efflux -->phospholipid efflux -->transmembrane transport	-->integral component of plasma membrane -->intracellular membrane-bounded organelle	-->ATPase activity, coupled to transmembrane movement of substances -->ATP binding -->cholesterol transporter activity -->phospholipid transporter activity
Nuclear pore complex protein Nup160 <sp|Q9Z0W3|NU160_MOUSE>	0	0	0	0	0	0	1.95701	1.96854	1.97407	0.97023	1.9842	1.88262	0 ± 0	1.789 ± 0.403	100	0.000114079	158232	CHAIN 1-1402	-->mRNA export from nucleus -->protein transport	-->kinetochore -->nuclear pore -->nuclear pore outer ring	-->nucleocytoplasmic transporter activity
Rho guanine nucleotide exchange factor 12 <sp|Q8R4H2|ARHGC_MOUSE>	0	0	0	0.996521	0.968045	0	0	0	0.987035	0	0.9921	0.941311	0.327 ± 0.507	0.487 ± 0.533	1.489	0.607663	172348	CHAIN 1-1543	-->G-protein coupled receptor signaling pathway -->regulation of Rho protein signal transduction -->Rho protein signal transduction	-->cytoplasm -->membrane	-->G-protein coupled receptor binding -->GTPase activator activity -->Rho guanyl-nucleotide exchange factor activity
Dedicator of cytokinesis protein 2 <sp|Q8C3J5|DOCK2_MOUSE>	0	0	0	0	0	0	0.978506	0.984271	0.987035	0.97023	0	0.941311	0 ± 0	0.81 ± 0.397	100	0.00411994	211704	CHAIN 1-1828	-->actin cytoskeleton organization -->alpha-beta T cell activation -->alpha-beta T cell proliferation -->chemotaxis -->cytoskeleton organization -->establishment of T cell polarity -->immunological synapse formation -->macropinocytosis -->membrane raft polarization -->myeloid dendritic cell activation involved in immune response -->negative thymic T cell selection -->positive regulation of GTPase…	-->cytoplasm -->cytoskeleton -->endomembrane system -->extracellular exosome -->membrane	-->GTPase activator activity -->Rac guanyl-nucleotide exchange factor activity -->T cell receptor binding
Sodium channel protein type 10 subunit alpha <sp|Q6QIY3|SCNAA_MOUSE>	1.01558	0	0	0.996521	0.968045	0	0.978506	0	0	0	0.9921	0	0.497 ± 0.544	0.328 ± 0.509	-1.515	0.592372	220552	CHAIN 1-1958	-->AV node cell action potential -->bundle of His cell action potential -->cardiac conduction -->membrane depolarization during action potential -->neuronal action potential -->regulation of atrial cardiac muscle cell membrane depolarization -->regulation of cardiac muscle contraction -->regulation of heart rate -->regulation of ion transmembrane transport -->regulation of postsynaptic membrane p…	-->axon -->C-fiber -->extracellular exosome -->plasma membrane -->voltage-gated sodium channel complex	-->ion channel binding -->voltage-gated sodium channel activity
Histone-lysine N-methyltransferase 2A <sp|P55200|KMT2A_MOUSE>	0	0	0	0	0	0	0	1.96854	0	1.94046	0	0.941311	0 ± 0	0.808 ± 0.96	100	0.0940549	429649	CHAIN 1-3966	-->anterior/posterior pattern specification -->circadian regulation of gene expression -->cognition -->definitive hemopoiesis -->DNA methylation -->embryonic hemopoiesis -->exploration behavior -->histone H3-K4 dimethylation -->histone H3-K4 methylation -->histone H3-K4 trimethylation -->histone H4-K16 acetylation -->homeostasis of number of cells within a tissue -->membrane depolarization -->neg…	-->cytoplasm -->histone methyltransferase complex -->MLL1 complex -->nucleoplasm -->nucleus	-->chromatin binding -->core promoter sequence-specific DNA binding -->DNA binding -->histone methyltransferase activity (H3-K4 specific) -->identical protein binding -->lysine-acetylated histone binding -->protein homodimerization activity -->transcription regulatory region DNA binding -->unmethylated CpG binding -->zinc ion binding
Microtubule-actin cross-linking factor 1 <sp|Q9QXZ0|MACF1_MOUSE>	1.01558	2.94319	1.02276	2.98956	0.968045	0.983527	0	0.984271	0.987035	0.97023	0	1.88262	1.654 ± 1.017	0.804 ± 0.714	-2.057	0.128398	831878	CHAIN 1-7354	-->cell cycle arrest -->establishment or maintenance of cell polarity -->Golgi to plasma membrane protein transport -->mesoderm formation -->metabolic process -->positive regulation of Wnt signaling pathway -->posttranslational protein targeting to membrane -->protein localization -->regulation of epithelial cell migration -->regulation of focal adhesion assembly -->regulation of microtubule-base…	-->actin cytoskeleton -->cell cortex -->cytoplasm -->Golgi apparatus -->membrane -->microtubule -->microtubule cytoskeleton -->neuronal postsynaptic density -->ruffle membrane	-->actin binding -->ATPase activity -->calcium ion binding -->microtubule binding
Serine hydroxymethyltransferase, mitochondrial <sp|Q9CZN7|GLYM_MOUSE>	1.01558	0	0	0	0	0	0	0.984271	0	0	0	0.941311	0.169 ± 0.415	0.321 ± 0.497	1.899	0.579222	55758.7	CHAIN 1-504	-->glycine biosynthetic process from serine -->L-serine biosynthetic process -->one-carbon metabolic process -->positive regulation of cell proliferation -->protein homotetramerization -->tetrahydrofolate interconversion	-->extracellular vesicular exosome -->microtubule cytoskeleton -->mitochondrial inner membrane -->mitochondrial intermembrane space -->mitochondrial matrix -->mitochondrial nucleoid -->mitochondrion	-->amino acid binding -->chromatin binding -->glycine hydroxymethyltransferase activity -->L-allo-threonine aldolase activity -->pyridoxal phosphate binding
Beta-alanine-activating enzyme <sp|Q80WC9|ACSF4_MOUSE>	0	0	0	0	0	0	0.978506	0	0	0	0	0	0 ± 0	0.163 ± 0.399	100	0.363217			-	-	-
Aldo-keto reductase family 1 member B1 <sp|P45376|ALDR_MOUSE>	0	0.981065	0	0	0	0.983527	0	0.984271	0	0	0	0	0.327 ± 0.507	0.164 ± 0.402	-1.994	0.550815	35732.2	CHAIN 1-316	-->daunorubicin metabolic process -->doxorubicin metabolic process	-->cytoplasm -->extracellular vesicular exosome -->nucleus	-->alditol:NADP+ 1-oxidoreductase activity -->glyceraldehyde oxidoreductase activity
Glutamate dehydrogenase 1, mitochondrial <sp|P26443|DHE3_MOUSE>	0	0	0	0	0	0	0	0	0	0.97023	0.9921	0.941311	0 ± 0	0.484 ± 0.53	100	0.0756848	61336.8	CHAIN 1-558	-->glutamine metabolic process -->long-term memory -->positive regulation of insulin secretion -->response to aluminum ion -->tricarboxylic acid metabolic process	-->mitochondrial inner membrane -->mitochondrion	-->ATP binding -->glutamate dehydrogenase (NAD+) activity -->glutamate dehydrogenase [NAD(P)+] activity -->GTP binding
Coagulation factor VIII <sp|Q06194|FA8_MOUSE>	0	0	0	0	0	0	0	0	0	0.97023	0.9921	1.88262	0 ± 0	0.641 ± 0.775	100	0.0988057	266196	CHAIN 1-2319	-->acute-phase response -->platelet activation	-->extracellular space	-->copper ion binding -->oxidoreductase activity
Ig heavy chain V region MC101 <sp|P01821|HVM45_MOUSE>	1.01558	0.981065	1.02276	0.996521	0.968045	0.983527	0.978506	0	0.987035	0	0.9921	0.941311	0.995 ± 0.021	0.65 ± 0.504	-1.531	0.154542			-	-	-
Selenium-binding protein 2 <sp|Q63836|SBP2_MOUSE>	0	0	0	0	0	0	0	0.984271	0	0	0	0	0 ± 0	0.164 ± 0.402	100	0.363217	52610	CHAIN 1-472	-->protein transport	-->cytoplasm -->membrane -->nucleus	-->selenium binding
Lysine-specific demethylase PHF2 <sp|Q9WTU0|PHF2_MOUSE>	0	0.981065	1.02276	0	0	0.983527	0.978506	0.984271	0	0	0.9921	0.941311	0.498 ± 0.546	0.649 ± 0.503	1.303	0.628071	120814	CHAIN 1-1096	-->histone H3-K9 demethylation -->negative regulation of chromatin silencing at rDNA -->protein demethylation -->transcription, DNA-templated	-->condensed chromosome kinetochore -->cytoplasm -->nucleolus -->nucleus	-->dioxygenase activity -->histone demethylase activity (H3-K9 specific) -->iron ion binding -->methylated histone binding -->transcription coactivator activity -->zinc ion binding
Plasminogen activator inhibitor 1 RNA-binding protein <sp|Q9CY58|PAIRB_MOUSE>	0	0	0	0	0	0	0	0	0	0.97023	0	0	0 ± 0	0.162 ± 0.396	100	0.363217	44714.1	CHAIN 1-407	-->regulation of apoptotic process	-->cytoplasm -->extracellular vesicular exosome -->membrane -->nucleus -->perinuclear region of cytoplasm -->plasma membrane	-->mRNA 3'-UTR binding -->poly(A) RNA binding
4-aminobutyrate aminotransferase, mitochondrial <sp|P61922|GABT_MOUSE>	0	0	0	0	0.968045	0	0	0	0.987035	0.97023	0	0.941311	0.161 ± 0.395	0.483 ± 0.529	3	0.262575	56451.8	CHAIN 1-500	-->behavioral response to cocaine -->copulation -->gamma-aminobutyric acid metabolic process -->locomotory behavior -->negative regulation of blood pressure -->neurotransmitter catabolic process -->response to drug -->response to ethanol -->response to hypoxia -->response to iron ion -->response to nicotine	-->4-aminobutyrate transaminase complex -->extracellular vesicular exosome -->mitochondrion -->neuron projection	-->(S)-3-amino-2-methylpropionate transaminase activity -->4-aminobutyrate transaminase activity -->protein homodimerization activity -->pyridoxal phosphate binding -->succinate-semialdehyde dehydrogenase binding
Synaptotagmin-3 <sp|O35681|SYT3_MOUSE>	1.01558	0.981065	1.02276	1.99304	0.968045	0.983527	0.978506	0.984271	0.987035	0.97023	0.9921	0.941311	1.161 ± 0.408	0.976 ± 0.018	-1.19	0.317617			-	-	-
Ferroxidase HEPHL1 <sp|Q3V1H3|HPHL1_MOUSE>	5.07792	3.92426	3.06829	3.98608	1.93609	0	0.978506	2.95281	1.97407	2.91069	1.9842	4.70655	2.999 ± 1.804	2.584 ± 1.269	-1.161	0.656475	130888	CHAIN 1-1159	-->copper ion transport -->oxidation-reduction process	-->integral component of membrane	-->copper ion binding -->ferroxidase activity
Leukocyte receptor cluster member 8 homolog <sp|Q8CBY3|LENG8_MOUSE>	0	0	0	0	0	0	0	0	0	0.97023	0	0	0 ± 0	0.162 ± 0.396	100	0.363217			-	-	-
Ferrochelatase, mitochondrial <sp|P22315|HEMH_MOUSE>	0	0	0	0	0	0	0.978506	0.984271	0.987035	0.97023	0.9921	0.941311	0 ± 0	0.976 ± 0.018	100	5.12191e-10	47130.4	CHAIN 1-420	-->cellular response to dexamethasone stimulus -->cholesterol metabolic process -->detection of UV -->erythrocyte differentiation -->heme biosynthetic process -->iron ion homeostasis -->porphyrin-containing compound biosynthetic process -->protoporphyrinogen IX metabolic process -->regulation of eIF2 alpha phosphorylation by heme -->regulation of gene expression -->regulation of hemoglobin biosyn…	-->mitochondrial inner membrane -->mitochondrion	-->2 iron, 2 sulfur cluster binding -->ferrochelatase activity -->heme binding -->iron ion binding -->iron-responsive element binding -->tetrapyrrole binding
Acetyl-CoA acetyltransferase, cytosolic <sp|Q8CAY6|THIC_MOUSE>	0	0	0	0	0	0	0	0	0	0.97023	0	0	0 ± 0	0.162 ± 0.396	100	0.363217	41297.7	CHAIN 1-397	-->positive regulation of intestinal cholesterol absorption	-->cytoplasm -->extracellular exosome -->mitochondrion -->nucleolus -->nucleoplasm -->nucleus	-->acetyl-CoA C-acetyltransferase activity
Interferon alpha/beta receptor 2 <sp|O35664|INAR2_MOUSE>	0	0.981065	0	0	0	0.983527	0	0	0	0	0	0	0.327 ± 0.507	0 ± 0	-100	0.174688			-	-	-
Golgin subfamily A member 4 <sp|Q91VW5|GOGA4_MOUSE>	0	0	0	0	0	0	0	0.984271	0.987035	0.97023	1.9842	0.941311	0 ± 0	0.978 ± 0.628	100	0.0124307	257564	CHAIN 1-2238	-->Golgi to plasma membrane protein transport -->positive regulation of axon extension -->protein targeting to Golgi	-->cytoplasm -->extracellular exosome -->Golgi apparatus -->Golgi membrane -->intracellular membrane-bounded organelle -->nucleoplasm	-->GTPase binding
Obscurin <sp|A2AAJ9|OBSCN_MOUSE>	0	0	1.02276	0.996521	0	0	0.978506	0	0.987035	0	0	0	0.337 ± 0.521	0.328 ± 0.508	-1.027	0.976539	966372	CHAIN 1-8891	-->cell differentiation -->multicellular organismal development	-->M band -->striated muscle myosin thick filament -->Z disc	-->ankyrin binding -->ATP binding -->protein serine/threonine kinase activity -->Rho guanyl-nucleotide exchange factor activity -->titin binding
Tyrosine-protein kinase BAZ1B <sp|Q9Z277|BAZ1B_MOUSE>	1.01558	0.981065	1.02276	0.996521	0.968045	0.983527	0	0.984271	0.987035	0	0.9921	0	0.995 ± 0.021	0.494 ± 0.541	-2.014	0.0727305	170651	CHAIN 1-1479	-->cellular response to DNA damage stimulus -->chromatin assembly or disassembly -->chromatin-mediated maintenance of transcription -->chromatin remodeling -->double-strand break repair -->heart morphogenesis -->histone phosphorylation -->peptidyl-tyrosine phosphorylation -->positive regulation of receptor activity -->regulation of transcription, DNA-templated -->transcription, DNA-templated	-->condensed chromosome -->nuclear replication fork -->nucleus -->pericentric heterochromatin	-->ATP binding -->chromatin binding -->histone binding -->histone kinase activity -->lysine-acetylated histone binding -->non-membrane spanning protein tyrosine kinase activity -->protein tyrosine kinase activity -->vitamin D receptor activator activity -->zinc ion binding
Serine/threonine-protein kinase PLK2 <sp|P53351|PLK2_MOUSE>	0	0	0	0	0	0	0.978506	0.984271	0.987035	0.97023	0.9921	0.941311	0 ± 0	0.976 ± 0.018	100	5.12191e-10			-	-	-
Zinc finger homeobox protein 2 <sp|Q2MHN3|ZFHX2_MOUSE>	0	0	0	0	0	0	0	0.984271	0	0	0	0	0 ± 0	0.164 ± 0.402	100	0.363217	273485	CHAIN 1-2562	-->adult behavior -->regulation of transcription, DNA-templated	-->nucleus	-->sequence-specific DNA binding -->zinc ion binding
Ryanodine receptor 2 <sp|E9Q401|RYR2_MOUSE>	1.01558	1.96213	1.02276	0	0.968045	1.96705	0	0.984271	0	0.97023	1.9842	1.88262	1.156 ± 0.737	0.97 ± 0.865	-1.192	0.697639	564819	CHAIN 1-4966	-->BMP signaling pathway -->calcium ion transmembrane transport -->calcium ion transport -->calcium ion transport into cytosol -->calcium-mediated signaling -->calcium-mediated signaling using intracellular calcium source -->canonical Wnt signaling pathway -->cardiac muscle contraction -->cardiac muscle hypertrophy -->cellular calcium ion homeostasis -->cellular response to caffeine -->cellular r…	-->calcium channel complex -->extracellular vesicular exosome -->integral component of membrane -->membrane -->protein complex -->sarcomere -->sarcoplasmic reticulum -->sarcoplasmic reticulum membrane -->smooth endoplasmic reticulum -->Z disc	-->calcium channel activity -->calcium-induced calcium release activity -->calcium ion binding -->calcium-release channel activity -->calmodulin binding -->enzyme binding -->identical protein binding -->intracellular ligand-gated calcium channel activity -->organic cyclic compound binding -->protein kinase A catalytic subunit binding -->protein kinase A regulatory subunit binding -->protein kinas…
Girdin <sp|Q5SNZ0|GRDN_MOUSE>	1.01558	1.96213	1.02276	0	0	0	0.978506	1.96854	0	0	0.9921	0.941311	0.667 ± 0.807	0.813 ± 0.739	1.219	0.749629	215918	CHAIN 1-1873	-->activation of protein kinase B activity -->cell migration -->DNA replication -->lamellipodium assembly -->membrane organization -->regulation of actin cytoskeleton organization -->regulation of cell proliferation -->regulation of DNA replication -->regulation of neuron projection development -->regulation of protein phosphorylation -->TOR signaling	-->cell leading edge -->cytoplasmic, membrane-bounded vesicle -->cytoplasmic vesicle -->cytosol -->endoplasmic reticulum -->Golgi apparatus -->lamellipodium -->membrane -->plasma membrane	-->actin binding -->microtubule binding -->phosphatidylinositol binding -->protein homodimerization activity -->protein kinase B binding
Uncharacterized protein C4orf54 homolog <sp|E0CYV9|CD054_MOUSE>	0	0.981065	0	0	0	0	0	0	0	0	0	0	0.164 ± 0.401	0 ± 0	-100	0.363217			-	-	-
CAP-Gly domain-containing linker protein 2 <sp|Q9Z0H8|CLIP2_MOUSE>	0	0	1.02276	0	0.968045	0	0.978506	0.984271	0	0.97023	0	0	0.332 ± 0.514	0.489 ± 0.536	1.473	0.615705	115910	CHAIN 1-1047	-	-->cytoplasmic microtubule -->dendritic microtubule -->lamellar body	-->microtubule plus-end binding
Sacsin <sp|Q9JLC8|SACS_MOUSE>	0	0	0	0.996521	0	0	0	0	0	0.97023	0	0.941311	0.166 ± 0.407	0.319 ± 0.494	1.922	0.572639	520685	CHAIN 1-4582	-->negative regulation of inclusion body assembly	-->mitochondrion -->nucleus	-->low-density lipoprotein particle receptor binding
RNA polymerase I-specific transcription initiation factor RRN3 <sp|B2RS91|RRN3_MOUSE>	0	0.981065	1.02276	0.996521	1.93609	0.983527	0.978506	0	0.987035	0	0.9921	0.941311	0.987 ± 0.613	0.65 ± 0.504	-1.518	0.323561			-	-	-
Microtubule cross-linking factor 1 <sp|Q3UHU5|MTCL1_MOUSE>	0	0	0	0	0	0.983527	0	0	0	0	0.9921	0	0.164 ± 0.402	0.165 ± 0.405	1.006	0.995224	213862	CHAIN 1-1945	-->establishment or maintenance of epithelial cell apical/basal polarity -->microtubule bundle formation -->positive regulation of microtubule motor activity -->positive regulation of protein targeting to membrane -->regulation of autophagy	-->apical plasma membrane -->apicolateral plasma membrane -->cytoplasm -->cytoskeleton -->extracellular space -->lateral plasma membrane -->microtubule bundle -->midbody -->spindle pole	-->microtubule binding -->poly(A) RNA binding -->protein homodimerization activity
Cathepsin D <sp|P18242|CATD_MOUSE>	0	0	0	0	0	0	0.978506	0.984271	0.987035	0	0	0	0 ± 0	0.492 ± 0.539	100	0.0755896	44953.8	CHAIN 1-410	-->autophagosome assembly -->protein catabolic process -->proteolysis	-->extracellular exosome -->extracellular space -->lysosome -->melanosome -->membrane raft -->mitochondrion	-->aspartic-type endopeptidase activity -->hydrolase activity -->peptidase activity -->peptide binding
DBF4-type zinc finger-containing protein 2 homolog <sp|Q5SS00|ZDBF2_MOUSE>	1.01558	0.981065	0	0	0.968045	0	0.978506	0	0.987035	0	0.9921	2.82393	0.494 ± 0.541	0.964 ± 1.031	1.951	0.354097			-	-	-
THO complex subunit 2 <sp|B1AZI6|THOC2_MOUSE>	0	0	1.02276	0	0	0	0.978506	0.984271	0	0	0.9921	0	0.17 ± 0.418	0.492 ± 0.54	2.894	0.276105	182773	CHAIN 1-1594	-->blastocyst development -->cell morphogenesis -->mRNA export from nucleus -->mRNA processing -->poly(A)+ mRNA export from nucleus -->regulation of gene expression -->regulation of mRNA export from nucleus -->RNA splicing -->stem cell division -->viral mRNA export from host cell nucleus	-->nuclear speck -->nucleoplasm -->nucleus -->THO complex -->THO complex part of transcription export complex -->transcription export complex	-->mRNA binding
Dermatopontin <sp|Q9QZZ6|DERM_MOUSE>	0	0	0	0	0	0	0.978506	0	0	0.97023	0	0	0 ± 0	0.325 ± 0.503	100	0.174693	23994.8	CHAIN 1-201	-->cell adhesion -->collagen fibril organization -->negative regulation of cell proliferation	-->extracellular exosome -->extracellular space -->proteinaceous extracellular matrix	-
A disintegrin and metalloproteinase with thrombospondin motifs 12 <sp|Q811B3|ATS12_MOUSE>	0	0	0	0	0	0	0	0	0.987035	0	0	0	0 ± 0	0.165 ± 0.403	100	0.363217	177769	CHAIN 1-1600	-->cell-matrix adhesion -->cell migration -->cellular response to BMP stimulus -->cellular response to interleukin-1 -->cellular response to tumor necrosis factor -->negative regulation of cellular response to hepatocyte growth factor stimulus -->negative regulation of cellular response to vascular endothelial growth factor stimulus -->negative regulation of chondrocyte differentiation -->negativ…	-->extracellular matrix -->proteinaceous extracellular matrix	-->metalloendopeptidase activity -->zinc ion binding
Striated muscle-specific serine/threonine-protein kinase <sp|Q62407|SPEG_MOUSE>	2.03117	0.981065	0	1.99304	1.93609	0	0.978506	0.984271	0.987035	1.94046	1.9842	0.941311	1.157 ± 0.978	1.303 ± 0.511	1.126	0.755057	354343	CHAIN 1-3262	-->cardiac muscle cell development -->cardiovascular system development -->in utero embryonic development -->respiratory system development	-->nucleus	-->ATP binding -->protein serine/threonine kinase activity
DNA cross-link repair 1A protein <sp|Q9JIC3|DCR1A_MOUSE>	0	0	0	0	0	0	0	0.984271	0	0	0	0	0 ± 0	0.164 ± 0.402	100	0.363217	113567	CHAIN 1-1026	-->cell division -->double-strand break repair via nonhomologous end joining -->interstrand cross-link repair -->mitotic nuclear division -->nucleic acid phosphodiester bond hydrolysis -->nucleotide-excision repair -->protection from non-homologous end joining at telomere	-->nuclear chromosome, telomeric region -->nucleolus -->nucleus	-->5'-3' exodeoxyribonuclease activity -->damaged DNA binding
Probable G-protein coupled receptor 83 <sp|P30731|GPR83_MOUSE>	2.03117	1.96213	2.04553	2.98956	4.84022	3.93411	1.95701	1.96854	1.97407	4.85115	2.9763	3.76524	2.967 ± 1.198	2.915 ± 1.198	-1.018	0.941855			-	-	-
Cytoplasmic dynein 1 heavy chain 1 <sp|Q9JHU4|DYHC1_MOUSE>	0	0	0	0	0	0	0.978506	0.984271	1.97407	0	1.9842	0.941311	0 ± 0	1.144 ± 0.748	100	0.0133586	532045	CHAIN 1-4644	-->cilium movement -->cytoplasmic mRNA processing body assembly -->stress granule assembly -->transport	-->axonemal dynein complex -->centrosome -->cytoplasm -->extracellular vesicular exosome -->filopodium -->microtubule	-->ATPase activity -->ATP binding -->dynein light intermediate chain binding -->microtubule motor activity -->poly(A) RNA binding
3'-5' exoribonuclease 1 <sp|Q7TMF2|ERI1_MOUSE>	0	0	0	0	0	0	0.978506	0	0	0.97023	0.9921	0	0 ± 0	0.49 ± 0.537	100	0.0756048			-	-	-
B-cell CLL/lymphoma 6 member B protein <sp|O88282|BCL6B_MOUSE>	1.01558	1.96213	3.06829	0	0.968045	2.95058	0.978506	0	0	0.97023	1.9842	0.941311	1.661 ± 1.216	0.812 ± 0.743	-2.046	0.18159			-	-	-
Traf2 and NCK-interacting protein kinase <sp|P83510|TNIK_MOUSE>	0	0	0	0	0.968045	0.983527	0	0	0.987035	0	0.9921	0.941311	0.325 ± 0.504	0.487 ± 0.533	1.498	0.601724			-	-	-
Phosphatidate phosphatase LPIN1 <sp|Q91ZP3|LPIN1_MOUSE>	0	0	0	0	0	0	0.978506	0	0	0	0	0	0 ± 0	0.163 ± 0.399	100	0.363217	102002	CHAIN 1-924	-->actin cytoskeleton reorganization -->cellular response to insulin stimulus -->dephosphorylation -->fat cell differentiation -->fatty acid catabolic process -->lipid metabolic process -->mitochondrial fission -->negative regulation of transcription from RNA polymerase II promoter -->positive regulation of histone deacetylation -->positive regulation of transcription from RNA polymerase II promo…	-->cytoplasm -->endoplasmic reticulum membrane -->mitochondrial outer membrane -->nuclear membrane -->nucleus -->transcription factor complex	-->histone deacetylase binding -->peroxisome proliferator activated receptor binding -->phosphatidate phosphatase activity -->RNA polymerase II transcription factor binding -->transcription coactivator activity
Probable RNA-binding protein 46 <sp|P86049|RBM46_MOUSE>	0	0	0	0	0	0	0	0	0	0	0.9921	0	0 ± 0	0.165 ± 0.405	100	0.363217	60077.5	CHAIN 1-533	-->mRNA stabilization -->trophectodermal cell differentiation	-->Extracellular region or secreted Cytosol Plasma membrane Cytoskeleton Lysosome Endosome Peroxisome ER Golgi apparatus Nucleus Mitochondrion Manual annotation Automatic computational assertionGraphics by Christian Stolte; -->nucleus	-->RNA binding
Protein KRBA1 <sp|Q6NXZ1|KRBA1_MOUSE>	0	0	0	0	0	0	0.978506	0	0	0	0	0	0 ± 0	0.163 ± 0.399	100	0.363217			-	-	-
Rootletin <sp|Q8CJ40|CROCC_MOUSE>	1.01558	0.981065	1.02276	1.99304	0.968045	0.983527	0	0.984271	0.987035	0.97023	1.9842	1.88262	1.161 ± 0.408	1.135 ± 0.727	-1.023	0.941126	226945	CHAIN 1-2009	-->cell cycle -->cell projection organization -->centriole-centriole cohesion -->centrosome organization -->ciliary basal body organization -->epithelial structure maintenance -->establishment of organelle localization -->photoreceptor cell maintenance -->protein localization -->protein localization to organelle	-->actin cytoskeleton -->centriole -->centrosome -->ciliary rootlet -->cytoplasm -->extracellular exosome -->photoreceptor inner segment -->plasma membrane	-->actin binding -->kinesin binding -->structural molecule activity
Cerebral cavernous malformations 2 protein-like <sp|Q8VCC6|CCM2L_MOUSE>	2.03117	1.96213	1.02276	0.996521	0.968045	1.96705	0.978506	0.984271	1.97407	0.97023	0.9921	0.941311	1.491 ± 0.544	1.14 ± 0.409	-1.308	0.236831			-	-	-
cAMP-regulated phosphoprotein 19 <sp|P56212|ARP19_MOUSE>	0	0	0	0	0	0	0	0	0.987035	0	0	0	0 ± 0	0.165 ± 0.403	100	0.363217			-	-	-
E3 ubiquitin-protein ligase MYCBP2 <sp|Q7TPH6|MYCB2_MOUSE>	0	0.981065	0	0	0.968045	0.983527	0	1.96854	0	0.97023	1.9842	1.88262	0.489 ± 0.535	1.134 ± 0.957	2.319	0.187996	517738	CHAIN 1-4711	-->branchiomotor neuron axon guidance -->cell morphogenesis involved in neuron differentiation -->central nervous system projection neuron axonogenesis -->motor neuron axon guidance -->negative regulation of protein catabolic process -->regulation of cytoskeleton organization -->regulation of protein localization -->regulation of transcription, DNA-templated -->transcription, DNA-templated	-->axon -->membrane -->microtubule cytoskeleton -->nucleus	-->ligase activity -->protein homodimerization activity -->ubiquitin-protein transferase activity -->zinc ion binding
MLX-interacting protein <sp|Q2VPU4|MLXIP_MOUSE>	0	0	0	0	0	0	0	0	0	0.97023	0	0	0 ± 0	0.162 ± 0.396	100	0.363217			-	-	-
Voltage-dependent N-type calcium channel subunit alpha-1B <sp|O55017|CAC1B_MOUSE>	0	0	0	0	0	0.983527	0	0	0	0	0	0	0.164 ± 0.402	0 ± 0	-100	0.363217	261481	CHAIN 1-2327	-->calcium ion transmembrane transport -->calcium ion transport -->locomotory behavior -->membrane depolarization during action potential -->neurotransmitter secretion -->regulation of blood pressure -->regulation of calcium ion transport -->regulation of heart contraction -->response to pain	-->dendrite -->membrane -->neuronal cell body -->presynapse -->voltage-gated calcium channel complex	-->ATP binding -->calcium ion binding -->high voltage-gated calcium channel activity -->protein C-terminus binding -->voltage-gated calcium channel activity
Collagen alpha-1(XVIII) chain <sp|P39061|COIA1_MOUSE>	0	0	0	0	0	0	0.978506	0	0	1.94046	0	0	0 ± 0	0.486 ± 0.813	100	0.202496	182172	CHAIN 1-1774	-->angiogenesis -->cell adhesion -->endothelial cell morphogenesis -->extracellular matrix organization -->positive regulation of cell migration -->positive regulation of cell proliferation -->positive regulation of endothelial cell apoptotic process -->response to drug -->response to hydrostatic pressure	-->basement membrane -->collagen trimer -->extracellular space -->extracellular vesicular exosome	-->metal ion binding -->structural molecule activity
FYVE and coiled-coil domain-containing protein 1 <sp|Q8VDC1|FYCO1_MOUSE>	0	0	0	0	0	0	1.95701	0.984271	0.987035	1.94046	1.9842	0	0 ± 0	1.309 ± 0.8	100	0.0102292	162336	CHAIN 1-1437	-->'de novo' protein folding -->chaperone-mediated protein folding -->plus-end-directed vesicle transport along microtubule -->positive regulation of autophagosome maturation	-->Extracellular region or secreted Cytosol Plasma membrane Cytoskeleton Lysosome Endosome Peroxisome ER Golgi apparatus Nucleus Mitochondrion Manual annotation Automatic computational assertionGraphics by Christian Stolte; -->late endosome -->Golgi apparatus -->lysosome -->autophagosome -->intracellular membrane-bounded organelle	-->ATP binding -->metal ion binding -->protein binding involved in protein folding -->unfolded protein binding
Rac GTPase-activating protein 1 <sp|Q9WVM1|RGAP1_MOUSE>	0	0	0	0	0	0	0	0	0.987035	0.97023	0.9921	0.941311	0 ± 0	0.648 ± 0.503	100	0.0250865	70158.5	CHAIN 1-628	-->actomyosin contractile ring assembly -->embryo development -->intracellular signal transduction -->mitotic cytokinesis -->mitotic spindle midzone assembly -->neuroblast proliferation -->positive regulation of cytokinesis -->positive regulation of GTPase activity -->regulation of attachment of spindle microtubules to kinetochore -->regulation of GTPase activity -->spermatogenesis -->sulfate tra…	-->acrosomal vesicle -->centralspindlin complex -->cleavage furrow -->cytoplasm -->extracellular exosome -->extrinsic component of cytoplasmic side of plasma membrane -->midbody -->mitotic spindle -->nucleoplasm -->nucleus -->spindle midzone	-->alpha-tubulin binding -->beta-tubulin binding -->gamma-tubulin binding -->GTPase activator activity -->metal ion binding -->microtubule binding -->phosphatidylinositol-3,4,5-trisphosphate binding -->protein kinase binding
Anoctamin-8 <sp|Q6PB70|ANO8_MOUSE>	0	0	0	0	0	0	0	0	0	0	0	0.941311	0 ± 0	0.157 ± 0.384	100	0.363217	119101	CHAIN 1-1060	-->chloride transmembrane transport -->chloride transport	-->integral component of membrane -->intracellular -->plasma membrane	-->intracellular calcium activated chloride channel activity
ATP-binding cassette sub-family C member 9 <sp|P70170|ABCC9_MOUSE>	0	0	0	0	0	0	0	0	0	0.97023	0.9921	0	0 ± 0	0.327 ± 0.507	100	0.174721	174239	CHAIN 1-1546	-->defense response to virus -->potassium ion transmembrane transport	-->plasma membrane -->sarcolemma -->sarcomere -->voltage-gated potassium channel complex	-->ATPase activity, coupled to transmembrane movement of substances -->ATP binding -->ion channel binding -->sulfonylurea receptor activity
Chromodomain-helicase-DNA-binding protein 7 <sp|A2AJK6|CHD7_MOUSE>	2.03117	0	0	0	0.968045	0	0	0.984271	0	0.97023	1.9842	0.941311	0.5 ± 0.844	0.813 ± 0.744	1.626	0.510641	334061	CHAIN 1-2986	-->adult heart development -->adult walking behavior -->aorta development -->aorta morphogenesis -->artery morphogenesis -->atrioventricular canal development -->blood circulation -->blood vessel development -->blood vessel remodeling -->camera-type eye development -->cardiac septum morphogenesis -->central nervous system development -->chromatin remodeling -->cognition -->cranial nerve developme…	-->nucleus	-->ATP binding -->helicase activity -->promoter-specific chromatin binding -->RNA polymerase II core promoter proximal region sequence-specific DNA binding
Pyridoxal phosphate phosphatase PHOSPHO2 <sp|Q9D9M5|PHOP2_MOUSE>	0	0	0	0	0	0	0	0	0	0	0.9921	1.88262	0 ± 0	0.479 ± 0.794	100	0.199376			-	-	-
Nucleoredoxin-like protein 2 <sp|Q9D531|NXNL2_MOUSE>	0	0	0	0	0	0	0	0.984271	0	0	0.9921	0	0 ± 0	0.329 ± 0.51	100	0.174692			-	-	-
Coiled-coil domain-containing protein 40 <sp|Q8BI79|CCD40_MOUSE>	0	0	0	0	0	0	2.93552	0.984271	0	0	0	1.88262	0 ± 0	0.967 ± 1.226	100	0.111249	136772	CHAIN 1-1192	-->axonemal dynein complex assembly -->cilium movement -->determination of digestive tract left/right asymmetry -->determination of liver left/right asymmetry -->determination of pancreatic left/right asymmetry -->epithelial cilium movement -->epithelial cilium movement involved in determination of left/right asymmetry -->heart looping -->inner dynein arm assembly -->lung development -->motile ci…	-->axoneme -->cilium -->cytoplasm	-
Neutrophil cytosol factor 2 <sp|O70145|NCF2_MOUSE>	0	0	0	0	0	0	0	0.984271	0	0	0	0	0 ± 0	0.164 ± 0.402	100	0.363217	59485.3	CHAIN 1-525	-->NADP catabolic process -->oxidation-reduction process -->superoxide anion generation -->superoxide metabolic process	-->acrosomal vesicle -->cytoplasm -->cytosol -->nucleolus	-->protein C-terminus binding -->Rac GTPase binding
Dynein heavy chain 3, axonemal <sp|Q8BW94|DYH3_MOUSE>	0	0	0	0	0	0	0.978506	0.984271	0	0	0	0	0 ± 0	0.327 ± 0.507	100	0.17469	467777	CHAIN 1-4083	-->microtubule-based movement	-->inner dynein arm -->microtubule	-->ATP binding -->microtubule motor activity
Trinucleotide repeat-containing gene 18 protein <sp|Q80WC3|TNC18_MOUSE>	0	0	0	0.996521	0.968045	0	0.978506	0	0	0	0.9921	0	0.327 ± 0.507	0.328 ± 0.509	1.003	0.997329	307635	CHAIN 1-2878	-->chromatin silencing -->heterochromatin assembly	-->chromatin -->chromatin silencing complex -->cytoplasm -->mitochondrion -->nuclear membrane -->nucleoplasm -->nucleus	-->chromatin binding -->transcription regulatory region sequence-specific DNA binding
Titin <sp|A2ASS6|TITIN_MOUSE>	1.01558	1.96213	0	1.99304	0	0.983527	1.95701	0.984271	0.987035	3.88092	2.9763	1.88262	0.992 ± 0.885	2.111 ± 1.139	2.128	0.088384	3.90649e+06	CHAIN 1-35213	-->cardiac muscle contraction -->cardiac muscle fiber development -->cardiac muscle hypertrophy -->cardiac muscle tissue morphogenesis -->heart development -->mitotic chromosome condensation -->regulation of protein kinase activity -->regulation of relaxation of cardiac muscle -->response to calcium ion -->sarcomerogenesis -->skeletal muscle myosin thick filament assembly -->skeletal muscle thin …	-->condensed nuclear chromosome -->extracellular vesicular exosome -->Golgi apparatus -->I band -->striated muscle thin filament	-->ankyrin binding -->ATP binding -->calcium ion binding -->protein serine/threonine kinase activity -->structural constituent of muscle
Testis-expressed protein 11 <sp|Q14AT2|TEX11_MOUSE>	0	0	0	0	0	0	0.978506	0.984271	0.987035	0	0	0	0 ± 0	0.492 ± 0.539	100	0.0755896			-	-	-
Nuclear pore membrane glycoprotein 210-like <sp|Q9D2F7|P210L_MOUSE>	0	0	0	0	0	0	0	0	0	0	0.9921	0	0 ± 0	0.165 ± 0.405	100	0.363217	208700	CHAIN 1-1881	-->Sertoli cell development -->spermatid development	-->integral component of membrane -->nuclear pore	-
Multimerin-1 <sp|B2RPV6|MMRN1_MOUSE>	0	0	0	0	0	0	0	0	0	0	0	0.941311	0 ± 0	0.157 ± 0.384	100	0.363217	136105	CHAIN 1-1210	-->blood coagulation	-->extracellular matrix	-->calcium ion binding
Parkinson disease protein 7 homolog <sp|Q99LX0|PARK7_MOUSE>	0	0	0	0	0	0	0	0.984271	0	0	0	0	0 ± 0	0.164 ± 0.402	100	0.363217	20021.3	CHAIN 1-189	-->adult locomotory behavior -->autophagy -->cell proliferation -->cellular response to glyoxal -->cellular response to hydrogen peroxide -->cellular response to oxidative stress -->cellular response to reactive oxygen species -->dopamine uptake involved in synaptic transmission -->enzyme active site formation via L-cysteine sulfinic acid -->glycolate biosynthetic process -->glyoxal catabolic pro…	-->cell body -->cytoplasm -->cytosol -->extracellular vesicular exosome -->mitochondrial intermembrane space -->mitochondrial matrix -->mitochondrion -->neuron projection -->nucleus -->plasma membrane	-->glyoxalase (glycolic acid-forming) activity -->glyoxalase III activity -->mRNA binding -->peptidase activity -->peroxiredoxin activity -->protein homodimerization activity -->RNA binding
Probable tRNA N6-adenosine threonylcarbamoyltransferase <sp|Q8BWU5|OSGEP_MOUSE>	0	0	0	0	0	0	0	0.984271	0	0	0	0	0 ± 0	0.164 ± 0.402	100	0.363217	36300.8	CHAIN 1-335	-->tRNA threonylcarbamoyladenosine modification	-->cytoplasm -->EKC/KEOPS complex -->nucleus	-->metal ion binding -->N(6)-L-threonylcarbamoyladenine synthase
Transient receptor potential cation channel subfamily M member 6 <sp|Q8CIR4|TRPM6_MOUSE>	0	0	0	0	0	0	0	0	0	1.94046	0	0	0 ± 0	0.323 ± 0.792	100	0.363217			-	-	-
AT-rich interactive domain-containing protein 2 <sp|E9Q7E2|ARID2_MOUSE>	0	0	1.02276	0	0	0	0	0	0	0	0	0	0.17 ± 0.418	0 ± 0	-100	0.363217			-	-	-
Leucine-rich repeat-containing protein 41 <sp|Q8K1C9|LRC41_MOUSE>	0	0	0	0	0	0	0	0	0	0	0.9921	0	0 ± 0	0.165 ± 0.405	100	0.363217			-	-	-
Protein sidekick-1 <sp|Q3UH53|SDK1_MOUSE>	1.01558	0	0	0.996521	0	0.983527	0	0	0	0.97023	0.9921	0.941311	0.499 ± 0.547	0.484 ± 0.53	-1.031	0.961659	240306	CHAIN 1-2193	-->behavioral response to cocaine -->homophilic cell adhesion via plasma membrane adhesion molecules -->regulation of dendritic spine development -->retina layer formation -->synapse assembly	-->cell junction -->extracellular exosome -->integral component of membrane -->plasma membrane -->synapse	-->identical protein binding
Voltage-dependent L-type calcium channel subunit alpha-1D <sp|Q99246|CAC1D_MOUSE>	0	0	0	0	0	0	0.978506	1.96854	0.987035	0	0.9921	2.82393	0 ± 0	1.292 ± 0.975	100	0.022836	247061	CHAIN 1-2179	-->adenylate cyclase-modulating G-protein coupled receptor signaling pathway -->calcium ion import -->calcium ion transmembrane transport -->calcium ion transport -->cardiac conduction -->membrane depolarization during SA node cell action potential -->positive regulation of calcium ion transport -->regulation of atrial cardiac muscle cell membrane repolarization -->regulation of heart rate by car…	-->integral component of plasma membrane -->L-type voltage-gated calcium channel complex -->plasma membrane -->voltage-gated calcium channel complex -->Z disc	-->alpha-actinin binding -->ankyrin binding -->high voltage-gated calcium channel activity -->metal ion binding -->voltage-gated calcium channel activity -->voltage-gated calcium channel activity involved SA node cell action potential
Zinc finger protein 638 <sp|Q61464|ZN638_MOUSE>	0	0	0	0	0	0	0	0	0	1.94046	0	0	0 ± 0	0.323 ± 0.792	100	0.363217	218134	CHAIN 1-1960	-->regulation of transcription, DNA-templated -->transcription, DNA-templated	-->intracellular membrane-bounded organelle -->nuclear speck -->nucleoplasm	-->DNA binding -->nucleotide binding -->poly(A) RNA binding -->zinc ion binding
Hyaluronan synthase 2 <sp|P70312|HYAS2_MOUSE>	0	0	0	0	0	0	0	0	0	0	0	0.941311	0 ± 0	0.157 ± 0.384	100	0.363217	63510.3	CHAIN 1-552	-->atrioventricular canal development -->bone morphogenesis -->cell adhesion -->cellular response to fluid shear stress -->cellular response to interleukin-1 -->cellular response to platelet-derived growth factor stimulus -->cellular response to tumor necrosis factor -->endocardial cushion to mesenchymal transition -->estrous cycle -->extracellular matrix assembly -->extracellular polysaccharide …	-->cytoplasm -->integral component of plasma membrane	-->hyaluronan synthase activity
DNA-directed RNA polymerase II subunit RPB1 <sp|P08775|RPB1_MOUSE>	0	0	0	0	0	0	0	0	0.987035	0	0	0	0 ± 0	0.165 ± 0.403	100	0.363217	217176	CHAIN 1-1970	-->cellular response to oxygen levels -->DNA-templated transcription, termination -->piRNA metabolic process -->positive regulation of RNA splicing -->response to organic cyclic compound -->transcription from RNA polymerase II promoter	-->DNA-directed RNA polymerase II, core complex -->nuclear euchromatin -->nucleoplasm -->nucleus	-->core promoter binding -->DNA binding -->DNA-directed RNA polymerase activity -->metal ion binding -->poly(A) RNA binding -->ubiquitin protein ligase binding
Pantetheinase <sp|Q9Z0K8|VNN1_MOUSE>	0	0	0	0	0	0	0	0.984271	0	0	0	0	0 ± 0	0.164 ± 0.402	100	0.363217			-	-	-
CAP-Gly domain-containing linker protein 1 <sp|Q922J3|CLIP1_MOUSE>	0	0	0	0	0	0	0	0	1.97407	0	0	0	0 ± 0	0.329 ± 0.806	100	0.363217	155814	CHAIN 1-1391	-->microtubule bundle formation -->positive regulation of microtubule polymerization -->protein transport into plasma membrane raft	-->centrosome -->cytoplasm -->cytoplasmic vesicle membrane -->macropinosome -->microtubule -->microtubule cytoskeleton -->microtubule end -->microtubule plus-end -->nuclear envelope -->ruffle	-->microtubule binding -->microtubule plus-end binding -->tubulin binding -->zinc ion binding
E3 ubiquitin-protein ligase RNF8 <sp|Q8VC56|RNF8_MOUSE>	0	0	0	0	0	0	0	0	0.987035	0	0.9921	0	0 ± 0	0.33 ± 0.511	100	0.17469	55516.9	CHAIN 1-488	-->cell division -->cellular response to DNA damage stimulus -->double-strand break repair -->double-strand break repair via nonhomologous end joining -->histone exchange -->histone H2A K63-linked ubiquitination -->histone H2A ubiquitination -->histone H2B ubiquitination -->isotype switching -->mitotic nuclear division -->negative regulation of transcription elongation from RNA polymerase II prom…	-->chromosome, telomeric region -->midbody -->nucleolus -->nucleus -->site of double-strand break -->ubiquitin ligase complex	-->chromatin binding -->histone binding -->ligase activity -->protein homodimerization activity -->ubiquitin protein ligase activity -->ubiquitin protein ligase binding -->ubiquitin-protein transferase activity -->zinc ion binding
Deoxynucleoside triphosphate triphosphohydrolase SAMHD1 <sp|Q60710|SAMH1_MOUSE>	0	0	0	0	0	0	0.978506	0	2.96111	1.94046	0	0	0 ± 0	0.98 ± 1.243	100	0.111371	72650.4	CHAIN 1-627	-->dATP catabolic process -->defense response to virus -->dGTP catabolic process -->innate immune response -->protein homotetramerization -->regulation of innate immune response	-->nucleoplasm -->nucleus -->plasma membrane	-->dGTPase activity -->dGTP binding -->nucleic acid binding -->RNA binding -->zinc ion binding
Collagen alpha-1(VII) chain <sp|Q63870|CO7A1_MOUSE>	0	0	0	0	0	0	0	0	0	0.97023	0	0	0 ± 0	0.162 ± 0.396	100	0.363217	295232	CHAIN 1-2944	-->cell adhesion -->endodermal cell differentiation	-->basement membrane -->collagen trimer -->extracellular region -->extracellular space	-->identical protein binding -->serine-type endopeptidase inhibitor activity
Ryanodine receptor 3 <sp|A2AGL3|RYR3_MOUSE>	1.01558	0	0	0	0	0	0	1.96854	0	0	0	0	0.169 ± 0.415	0.328 ± 0.804	1.941	0.679156	551335	CHAIN 1-4863	-->calcium ion transmembrane transport -->calcium ion transport -->cellular calcium ion homeostasis -->cellular response to ATP -->cellular response to caffeine -->cellular response to calcium ion -->cellular response to magnesium ion -->protein homotetramerization -->release of sequestered calcium ion into cytosol -->striated muscle contraction	-->Extracellular region or secreted Cytosol Plasma membrane Cytoskeleton Lysosome Endosome Peroxisome ER Golgi apparatus Nucleus Mitochondrion Manual annotation Automatic computational assertionGraphics by Christian Stolte; -->sarcoplasmic reticulum membrane -->plasma membrane -->integral component of membrane -->junctional membrane complex	-->calcium ion binding -->calcium-release channel activity -->calmodulin binding -->ryanodine-sensitive calcium-release channel activity
Nesprin-1 <sp|Q6ZWR6|SYNE1_MOUSE>	1.01558	0.981065	0	0	0	0	1.95701	0	0.987035	0	0	0	0.333 ± 0.516	0.491 ± 0.82	1.474	0.699542	1.00993e+06	CHAIN 1-8799	-->cytoskeletal anchoring at nuclear membrane -->establishment of nucleus localization -->Golgi organization -->muscle cell differentiation -->nuclear matrix anchoring at nuclear membrane	-->cytoplasm -->cytoskeleton -->Golgi apparatus -->integral component of membrane -->LINC complex -->nuclear envelope -->nuclear membrane -->nuclear outer membrane -->nucleoplasm -->nucleus -->postsynaptic membrane -->sarcomere	-->actin binding -->actin filament binding -->lamin binding -->poly(A) RNA binding -->protein homodimerization activity
Inositol polyphosphate-4-phosphatase type I A <sp|Q9EPW0|INP4A_MOUSE>	0	0	0	0	0	0	0	0	0	0.97023	0	0.941311	0 ± 0	0.319 ± 0.494	100	0.174749			-	-	-
DmX-like protein 2 <sp|Q8BPN8|DMXL2_MOUSE>	1.01558	0	1.02276	0.996521	0	0	0	0	0	1.94046	0	0.941311	0.506 ± 0.554	0.48 ± 0.808	-1.054	0.950569	338209	CHAIN 1-3032	-	-->cell junction -->extracellular space -->synaptic vesicle -->synaptic vesicle membrane	-->Rab GTPase binding
Leucine-rich repeat protein SHOC-2 <sp|O88520|SHOC2_MOUSE>	0	0	0	0	0	0	0	0	0	0	0	1.88262	0 ± 0	0.314 ± 0.769	100	0.363217			-	-	-
Acid-sensing ion channel 4 <sp|Q7TNS7|ASIC4_MOUSE>	0	0	0	0	0	0	0.978506	0	0	0	0	0	0 ± 0	0.163 ± 0.399	100	0.363217			-	-	-
ATP-binding cassette sub-family B member 6, mitochondrial <sp|Q9DC29|ABCB6_MOUSE>	0	0	0	0	0	0	0	0	0	0	0.9921	0	0 ± 0	0.165 ± 0.405	100	0.363217	93770.4	CHAIN 1-842	-->brain development -->heme transport -->porphyrin-containing compound biosynthetic process -->skin development	-->Extracellular region or secreted Cytosol Plasma membrane Cytoskeleton Lysosome Endosome Peroxisome ER Golgi apparatus Nucleus Mitochondrion Manual annotation Automatic computational assertionGraphics by Christian Stolte; -->cytosol -->endoplasmic reticulum -->endoplasmic reticulum membrane -->endosome -->endosome membrane -->Golgi apparatus -->Golgi membrane -->integral component of mitochondr…	-->ATP binding -->efflux transmembrane transporter activity -->heme binding -->heme-transporting ATPase activity
Sodium-coupled monocarboxylate transporter 1 <sp|Q8BYF6|SC5A8_MOUSE>	0	0	0	0	0	0	0	0	0	0.97023	0	0	0 ± 0	0.162 ± 0.396	100	0.363217			-	-	-
Gamma-aminobutyric acid receptor subunit rho-2 <sp|P56476|GBRR2_MOUSE>	0	0	0	0	0	0	0	0	0	0	0.9921	0	0 ± 0	0.165 ± 0.405	100	0.363217			-	-	-
Prolow-density lipoprotein receptor-related protein 1 <sp|Q91ZX7|LRP1_MOUSE>	0	0	0	0	0	0	0.978506	0	0	0	0	0	0 ± 0	0.163 ± 0.399	100	0.363217	504742	CHAIN 1-4545	-->aging -->aorta morphogenesis -->apoptotic cell clearance -->beta-amyloid clearance -->cell proliferation -->cholesterol metabolic process -->lipoprotein metabolic process -->negative regulation of neuron apoptotic process -->negative regulation of platelet-derived growth factor receptor-beta signaling pathway -->negative regulation of smooth muscle cell migration -->negative regulation of Wnt …	-->clathrin-coated vesicle -->coated pit -->dendrite -->endosome -->integral component of plasma membrane -->lysosomal membrane -->membrane -->neuronal cell body -->nucleus -->perinuclear region of cytoplasm -->receptor complex	-->calcium ion binding -->poly(A) RNA binding
Multidrug resistance-associated protein 9 <sp|Q80WJ6|MRP9_MOUSE>	0	0	0	0	0	0	0	0	0.987035	0	0	0	0 ± 0	0.165 ± 0.403	100	0.363217	153060	CHAIN 1-1366	-	-->integral component of membrane -->mitochondrion	-->ATPase activity, coupled to transmembrane movement of substances -->ATP binding
Coronin-1C <sp|Q9WUM4|COR1C_MOUSE>	0	0	0	0	0	0	0	0.984271	0	0	0	0	0 ± 0	0.164 ± 0.402	100	0.363217	53120.9	CHAIN 1-474	-->actin cortical patch assembly -->actin cytoskeleton organization -->activation of GTPase activity -->establishment of protein localization -->negative regulation of epithelial cell migration -->negative regulation of focal adhesion assembly -->negative regulation of protein kinase activity by regulation of protein phosphorylation -->negative regulation of protein phosphorylation -->negative re…	-->actin cytoskeleton -->cytoplasm -->cytoskeleton -->flotillin complex -->focal adhesion -->lamellipodium -->lateral plasma membrane -->vesicle	-->actin filament binding -->Rac GTPase binding
Dystonin <sp|Q91ZU6|DYST_MOUSE>	1.01558	0	0	0	0.968045	0	0	0	0	1.94046	0	0	0.331 ± 0.512	0.323 ± 0.792	-1.025	0.985524	834218	CHAIN 1-7393	-->axonogenesis -->cell adhesion -->cell cycle arrest -->intermediate filament cytoskeleton organization -->intracellular transport -->retrograde axon cargo transport	-->actin cytoskeleton -->axon -->cell cortex -->cytoplasm -->cytoplasmic membrane-bounded vesicle -->cytoplasmic side of plasma membrane -->endoplasmic reticulum membrane -->focal adhesion -->hemidesmosome -->H zone -->integral component of membrane -->intercalated disc -->intermediate filament -->membrane -->microtubule cytoskeleton	-->calcium ion binding -->microtubule plus-end binding -->protein homodimerization activity
MAX gene-associated protein <sp|A2AWL7|MGAP_MOUSE>	0	0	0	0	0	0.983527	0	0	0	1.94046	0	0	0.164 ± 0.402	0.323 ± 0.792	1.97	0.672575	328802	CHAIN 1-3003	-->transcription, DNA-templated	-->cytoplasm -->MLL1 complex -->nucleoplasm -->transcription factor complex	-->DNA binding -->sequence-specific DNA binding transcription factor activity
Hemicentin-2 <sp|A2AJ76|HMCN2_MOUSE>	0	0	0	0	0	0	0	0	0	1.94046	0	0	0 ± 0	0.323 ± 0.792	100	0.363217	547198	CHAIN 1-5100	-->response to stimulus	-->basement membrane -->cell cortex -->cell junction -->extracellular region	-->calcium ion binding
Ryanodine receptor 1 <sp|E9PZQ0|RYR1_MOUSE>	1.01558	0	0	0	0	0	0.978506	0.984271	0	0	0	0	0.169 ± 0.415	0.327 ± 0.507	1.935	0.568423	565039	CHAIN 1-5035	-->calcium ion transport -->cellular response to caffeine -->muscle contraction -->ossification involved in bone maturation -->outflow tract morphogenesis -->regulation of muscle contraction -->release of sequestered calcium ion into cytosol -->release of sequestered calcium ion into cytosol by sarcoplasmic reticulum -->response to hypoxia -->skeletal muscle fiber development -->skin development	-->cell cortex -->cytoplasm -->extracellular vesicular exosome -->I band -->integral component of membrane -->junctional membrane complex -->membrane -->plasma membrane -->protein complex -->sarcoplasmic reticulum -->sarcoplasmic reticulum membrane -->smooth endoplasmic reticulum -->T-tubule	-->calcium channel activity -->enzyme binding -->protease binding -->ryanodine-sensitive calcium-release channel activity -->voltage-gated calcium channel activity
Myocardin <sp|Q8VIM5|MYCD_MOUSE>	0	0	0	0	0	0	0.978506	0	0	0.97023	0.9921	0.941311	0 ± 0	0.647 ± 0.501	100	0.02508			-	-	-
Transmembrane protein KIAA1109 <sp|A2AAE1|K1109_MOUSE>	0	0	0	0	0.968045	0	0.978506	0	0	0.97023	1.9842	0.941311	0.161 ± 0.395	0.812 ± 0.743	5.043	0.0966257	555365	CHAIN 1-5005	-->adipose tissue development -->fat cell differentiation -->lipid metabolic process -->lipid storage -->nucleus localization -->regulation of cell growth -->spermatogenesis	-->integral component of membrane -->nucleus	-
E3 ubiquitin-protein ligase RNF213 <sp|E9Q555|RN213_MOUSE>	0	0	0	0.996521	0	0	0	0.984271	0.987035	0	1.9842	0.941311	0.166 ± 0.407	0.816 ± 0.744	4.916	0.0985394	584499	CHAIN 1-5150	-->protein autoubiquitination -->protein ubiquitination	-->cytoplasm -->membrane -->nucleolus	-->ATPase activity -->ligase activity -->ubiquitin-protein transferase activity -->zinc ion binding
DNA mismatch repair protein Msh3 <sp|P13705|MSH3_MOUSE>	0	0	0	0	0	0	0.978506	0.984271	0.987035	0	0.9921	0.941311	0 ± 0	0.814 ± 0.399	100	0.00412305			-	-	-
E3 ubiquitin-protein ligase PDZRN3 <sp|Q69ZS0|PZRN3_MOUSE>	0	0	0	0	0	0	0.978506	0	0	0	0	0	0 ± 0	0.163 ± 0.399	100	0.363217	119401	CHAIN 1-1063	-->neuromuscular junction development -->protein ubiquitination	-->neuromuscular junction	-->ligase activity -->ubiquitin protein ligase activity -->ubiquitin-protein transferase activity -->zinc ion binding
Putative monooxygenase p33MONOX <sp|Q9DBN4|P33MX_MOUSE>	0	0	0	0	0	0	0	0	0	0.97023	0.9921	0	0 ± 0	0.327 ± 0.507	100	0.174721	32715.1	CHAIN 1-303	-	-->cytoplasm	-->oxidoreductase activity
Tetratricopeptide repeat protein 28 <sp|Q80XJ3|TTC28_MOUSE>	0	0	0	0	0	0	0	0.984271	0	0	0	0	0 ± 0	0.164 ± 0.402	100	0.363217	267459	CHAIN 1-2450	-->cell division -->mitotic nuclear division -->regulation of mitotic cell cycle	-->centrosome -->cytoplasm -->midbody -->mitotic spindle -->mitotic spindle midzone -->mitotic spindle pole	-
Unconventional myosin-VIIb <sp|Q99MZ6|MYO7B_MOUSE>	0	0	0	0	0	0	0	0	0	0.97023	1.9842	0.941311	0 ± 0	0.649 ± 0.804	100	0.104946	240859	CHAIN 1-2113	-->brush border assembly -->cell differentiation	-->apical cytoplasm -->brush border -->extracellular exosome -->microvillus -->myosin complex	-->ATP binding -->motor activity
Zinc finger protein 354A <sp|Q61751|Z354A_MOUSE>	0	0	0	0	0	0	0	0	0	0	0	0.941311	0 ± 0	0.157 ± 0.384	100	0.363217			-	-	-
Hydrocephalus-inducing protein <sp|Q80W93|HYDIN_MOUSE>	1.01558	0	0	0	0	0	0	0.984271	0	0	0	0	0.169 ± 0.415	0.164 ± 0.402	-1.03	0.982771	581523	CHAIN 1-5154	-->cilium assembly -->cilium movement -->epithelial cell development -->multicellular organismal development -->trachea development -->ventricular system development	-->cilium	-
High affinity cGMP-specific 3',5'-cyclic phosphodiesterase 9A <sp|O70628|PDE9A_MOUSE>	0	0	0	0	0	0	0	0.984271	0.987035	0	0	0.941311	0 ± 0	0.485 ± 0.532	100	0.0756855			-	-	-
Vacuolar protein sorting-associated protein 18 homolog <sp|Q8R307|VPS18_MOUSE>	0	0	0	0	0	0	0	0.984271	0	0	0.9921	0	0 ± 0	0.329 ± 0.51	100	0.174692	110219	CHAIN 1-973	-->autophagy -->endosome organization -->endosome to lysosome transport -->intracellular protein transport -->lysosome organization -->regulation of SNARE complex assembly -->vesicle docking involved in exocytosis -->viral entry into host cell	-->Extracellular region or secreted Cytosol Plasma membrane Cytoskeleton Lysosome Endosome Peroxisome ER Golgi apparatus Nucleus Mitochondrion Manual annotation Automatic computational assertionGraphics by Christian Stolte; -->actin filament -->CORVET complex -->early endosome -->late endosome -->late endosome membrane -->lysosomal membrane -->lysosome -->autophagosome -->clathrin-coated vesicle …	-->actin binding -->metal ion binding -->protein binding, bridging -->syntaxin binding
4-trimethylaminobutyraldehyde dehydrogenase <sp|Q9JLJ2|AL9A1_MOUSE>	0	0	0	0	0	0	0	0	0	0	0	0.941311	0 ± 0	0.157 ± 0.384	100	0.363217	53514.7	CHAIN 1-494	-->carnitine biosynthetic process -->carnitine metabolic process -->cellular aldehyde metabolic process -->kidney development -->liver development -->neurotransmitter biosynthetic process -->oxidation-reduction process	-->cytosol -->extracellular exosome -->mitochondrion	-->4-trimethylammoniobutyraldehyde dehydrogenase activity -->aldehyde dehydrogenase (NAD) activity -->amine binding -->aminobutyraldehyde dehydrogenase activity -->NAD binding -->oxidoreductase activity, acting on the aldehyde or oxo group of donors, NAD or NADP as acceptor
Obscurin-like protein 1 <sp|D3YYU8|OBSL1_MOUSE>	0	0	0	0	0	0	0	0	0	0.97023	0	0	0 ± 0	0.162 ± 0.396	100	0.363217			-	-	-
SCO-spondin <sp|Q8CG65|SSPO_MOUSE>	0	0	1.02276	0	0	0.983527	0	0.984271	0.987035	0.97023	0	0.941311	0.334 ± 0.518	0.647 ± 0.502	1.937	0.313084			-	-	-
Zinc finger MYND domain-containing protein 11 <sp|Q8R5C8|ZMY11_MOUSE>	0	0	0	0	0	0	0	0	0	0	0.9921	0	0 ± 0	0.165 ± 0.405	100	0.363217			-	-	-
Protocadherin-15 <sp|Q99PJ1|PCD15_MOUSE>	0	0	0	0	0	0	0	0	0	0.97023	0	0	0 ± 0	0.162 ± 0.396	100	0.363217	214738	CHAIN 1-1943	-->actin filament bundle assembly -->actin filament organization -->adult walking behavior -->auditory receptor cell differentiation -->auditory receptor cell stereocilium organization -->detection of mechanical stimulus involved in equilibrioception -->detection of mechanical stimulus involved in sensory perception of sound -->equilibrioception -->homophilic cell adhesion via plasma membrane adh…	-->cytoplasm -->extracellular exosome -->extracellular space -->integral component of membrane -->photoreceptor outer segment -->plasma membrane -->stereocilium -->stereocilium bundle -->synapse	-->calcium ion binding
Dihydropteridine reductase <sp|Q8BVI4|DHPR_MOUSE>	0	0	0	0	0	0	0	0	0	0	0.9921	0	0 ± 0	0.165 ± 0.405	100	0.363217	25570.2	CHAIN 1-241	-->cellular response to drug -->liver development -->L-phenylalanine catabolic process -->response to aluminum ion -->response to glucagon -->response to lead ion -->tetrahydrobiopterin biosynthetic process	-->cytosol -->extracellular vesicular exosome -->mitochondrion -->neuron projection	-->6,7-dihydropteridine reductase activity -->NADH binding -->NADPH binding
F-box/LRR-repeat protein 4 <sp|Q8BH70|FBXL4_MOUSE>	1.01558	0.981065	1.02276	0	0.968045	0	0	0.984271	0.987035	0.97023	0	0	0.665 ± 0.515	0.49 ± 0.537	-1.357	0.578836			-	-	-
Protein virilizer homolog <sp|A2AIV2|VIR_MOUSE>	0	0	0	0	0	0	0	0	0	0	0.9921	0	0 ± 0	0.165 ± 0.405	100	0.363217	201439	CHAIN 1-1811	-->mRNA methylation -->mRNA processing -->RNA splicing	-->nuclear speck -->nucleoplasm	-->poly(A) RNA binding
Glutamate decarboxylase 2 <sp|P48320|DCE2_MOUSE>	0	0	0	0	0	0	0	0	0	0.97023	0	0	0 ± 0	0.162 ± 0.396	100	0.363217	65224	CHAIN 1-585	-->glutamate decarboxylation to succinate -->neurotransmitter biosynthetic process -->response to drug	-->anchored component of membrane -->axon -->cell junction -->cytoplasm -->cytosol -->Golgi membrane -->inhibitory synapse -->perinuclear region of cytoplasm -->presynaptic membrane -->synapse -->synaptic vesicle membrane	-->glutamate binding -->glutamate decarboxylase activity -->pyridoxal phosphate binding
GPN-loop GTPase 2 <sp|Q8VEJ1|GPN2_MOUSE>	1.01558	0.981065	0	0	0.968045	0.983527	0.978506	0	0.987035	0.97023	0	0	0.658 ± 0.51	0.489 ± 0.536	-1.346	0.588706			-	-	-
Striatin-3 <sp|Q9ERG2|STRN3_MOUSE>	0	0	0	0.996521	0	0.983527	0.978506	0	0.987035	0	0	0	0.33 ± 0.511	0.328 ± 0.508	-1.006	0.993602	87150.5	CHAIN 1-796	-->negative regulation of intracellular estrogen receptor signaling pathway -->negative regulation of transcription, DNA-templated -->negative regulation of transcription by RNA polymerase II -->positive regulation of transcription by RNA polymerase II -->response to estradiol	-->Extracellular region or secreted Cytosol Plasma membrane Cytoskeleton Lysosome Endosome Peroxisome ER Golgi apparatus Nucleus Mitochondrion Manual annotation Automatic computational assertionGraphics by Christian Stolte; -->Golgi apparatus -->nucleoplasm -->nucleus -->plasma membrane -->cytoplasm -->dendrite -->neuronal cell body -->protein phosphatase type 2A complex	-->armadillo repeat domain binding -->calmodulin binding -->DNA binding transcription factor activity -->protein-containing complex binding -->protein phosphatase 2A binding -->Rho GTPase binding
Protein FAM161B <sp|Q8CB59|F161B_MOUSE>	0	0	0	0	0	0	0	0	0	0.97023	0	0	0 ± 0	0.162 ± 0.396	100	0.363217			-	-	-
Acetyl-coenzyme A transporter 1 <sp|Q99J27|ACATN_MOUSE>	0	0	0	0	0	0	0	0	0	0.97023	0	0	0 ± 0	0.162 ± 0.396	100	0.363217	61075.4	CHAIN 1-550	-->BMP signaling pathway -->SMAD protein signal transduction -->transport	-->endoplasmic reticulum membrane -->integral component of plasma membrane -->membrane	-->acetyl-CoA transporter activity -->solute:proton symporter activity
Unconventional myosin-XV <sp|Q9QZZ4|MYO15_MOUSE>	1.01558	0	0	0	0	0	0	0	0	0	0	0	0.169 ± 0.415	0 ± 0	-100	0.363217	395622	CHAIN 1-3511	-->inner ear morphogenesis -->locomotory behavior -->sensory perception of sound	-->cytoplasm -->extracellular exosome -->myosin complex -->stereocilium -->stereocilium bundle	-->ATP binding -->motor activity
Signal-induced proliferation-associated protein 1 <sp|P46062|SIPA1_MOUSE>	0	0	0	0	0	0	0	0	0	0	0	0.941311	0 ± 0	0.157 ± 0.384	100	0.363217			-	-	-
Myotubularin-related protein 6 <sp|Q8VE11|MTMR6_MOUSE>	0	0	0	0	0.968045	0	0	0	0.987035	0	0	0	0.161 ± 0.395	0.165 ± 0.403	1.025	0.989311	70932.9	CHAIN 1-617	-->phosphatidylinositol dephosphorylation -->potassium ion transmembrane transport	-->cytoplasm -->nuclear envelope	-->calcium-activated potassium channel activity -->phosphatidylinositol phosphate phosphatase activity -->protein tyrosine phosphatase activity
Protein PHTF1 <sp|Q9QZ09|PHTF1_MOUSE>	0	0	0	0	0	0	0	0	0	0	0.9921	0.941311	0 ± 0	0.322 ± 0.499	100	0.174872	86779.4	CHAIN 1-761	-->regulation of transcription, DNA-templated -->transcription, DNA-templated	-->cis-Golgi network -->cytoplasm -->endoplasmic reticulum -->nucleolus -->nucleus	-->DNA binding
Inositol 1,4,5-trisphosphate receptor type 1 <sp|P11881|ITPR1_MOUSE>	0	0.981065	0	0	0.968045	0.983527	0	0	0	0	0	0.941311	0.489 ± 0.535	0.157 ± 0.384	-3.115	0.248405	313167	CHAIN 1-2749	-->calcium ion transport -->endoplasmic reticulum calcium ion homeostasis -->inositol phosphate-mediated signaling -->intrinsic apoptotic signaling pathway in response to endoplasmic reticulum stress -->negative regulation of calcium-mediated signaling -->post-embryonic development -->release of sequestered calcium ion into cytosol -->response to hypoxia -->voluntary musculoskeletal movement	-->calcineurin complex -->cytoplasm -->endoplasmic reticulum -->endoplasmic reticulum membrane -->integral component of membrane -->membrane -->nuclear envelope -->nuclear inner membrane -->nucleolus -->platelet dense granule membrane -->platelet dense tubular network -->postsynaptic density -->protein complex -->sarcoplasmic reticulum	-->calcium channel inhibitor activity -->inositol 1,4,5-trisphosphate-sensitive calcium-release channel activity -->intracellular ligand-gated calcium channel activity -->phosphatidylinositol binding
Transmembrane and coiled-coil domain protein 3 <sp|Q8R310|TMCC3_MOUSE>	0	0.981065	1.02276	0	0	0.983527	0	0.984271	0	0	0.9921	0.941311	0.498 ± 0.546	0.486 ± 0.533	-1.025	0.970986			-	-	-
Transcription termination factor 4, mitochondrial <sp|Q8BVN4|MTEF4_MOUSE>	0	0	0	0	0	0	0.978506	0	0	0.97023	0	0	0 ± 0	0.325 ± 0.503	100	0.174693			-	-	-
BCL-6 corepressor <sp|Q8CGN4|BCOR_MOUSE>	0	0	0	0	0	0	0	0	0	0	0.9921	0	0 ± 0	0.165 ± 0.405	100	0.363217	192631	CHAIN 1-1759	-->heart development -->histone H2A monoubiquitination -->negative regulation of bone mineralization -->negative regulation of histone H3-K36 methylation -->negative regulation of histone H3-K4 methylation -->negative regulation of tooth mineralization -->negative regulation of transcription, DNA-templated -->negative regulation of transcription from RNA polymerase II promoter -->odontogenesis --…	-->mitochondrion -->nucleus -->PcG protein complex	-->heat shock protein binding -->histone deacetylase binding -->transcription corepressor activity -->transcription factor binding -->transcription regulatory region DNA binding -->ubiquitin-protein transferase activity
Transcription elongation factor A N-terminal and central domain-containing protein <sp|Q3US16|TEANC_MOUSE>	0	0	0	0	0	0	0	0.984271	1.97407	0	0	0	0 ± 0	0.493 ± 0.825	100	0.203315			-	-	-
Kinesin-like protein KIF15 <sp|Q6P9L6|KIF15_MOUSE>	0	0.981065	0	0	0	0	0	0	0	0	0	0	0.164 ± 0.401	0 ± 0	-100	0.363217	160120	CHAIN 1-1387	-->metabolic process -->microtubule-based movement	-->cytoplasm -->kinesin complex -->membrane -->microtubule -->spindle	-->ATPase activity -->ATP binding -->microtubule motor activity
Ciliogenesis and planar polarity effector 1 <sp|Q8CE72|CPLN1_MOUSE>	0	0	0	0	0	0	0	0.984271	0	0	0	0	0 ± 0	0.164 ± 0.402	100	0.363217	358550	CHAIN 1-3214	-->cardiac septum development -->cerebellum development -->cilium assembly -->coronary vasculature development -->embryonic digit morphogenesis -->establishment of planar polarity -->heart development -->kidney development -->palate development -->protein localization to ciliary transition zone -->ventricular septum development	-->ciliary transition zone -->integral component of membrane	-
5-hydroxytryptamine receptor 1F <sp|Q02284|5HT1F_MOUSE>	0	0	0	0	0	0	0.978506	0	0	0	0	0	0 ± 0	0.163 ± 0.399	100	0.363217			-	-	-
A-kinase anchor protein 13 <sp|E9Q394|AKP13_MOUSE>	1.01558	1.96213	2.04553	0.996521	0	0.983527	0.978506	0.984271	1.97407	0.97023	0.9921	0.941311	1.167 ± 0.755	1.14 ± 0.409	-1.024	0.940287			-	-	-
Thyroid adenoma-associated protein homolog <sp|A8C756|THADA_MOUSE>	0	0	0	0	0	0	0	0	0	0	0.9921	0	0 ± 0	0.165 ± 0.405	100	0.363217			-	-	-
Cochlin <sp|Q62507|COCH_MOUSE>	0	0	1.02276	0.996521	0	0	0	0	0	0	0	0	0.337 ± 0.521	0 ± 0	-100	0.174733			-	-	-
NACHT, LRR and PYD domains-containing protein 4A <sp|Q8BU40|NAL4A_MOUSE>	0	0	0	0	0	0	0	0.984271	0	0	0	0.941311	0 ± 0	0.321 ± 0.497	100	0.174821			-	-	-
Canalicular multispecific organic anion transporter 2 <sp|B2RX12|MRP3_MOUSE>	0	0	0	0	0	0	0	0	0	0	0	1.88262	0 ± 0	0.314 ± 0.769	100	0.363217	169124	CHAIN 1-1523	-->canalicular bile acid transport	-->integral component of plasma membrane	-->ATPase activity, coupled to transmembrane movement of substances -->ATP binding
ATP-binding cassette sub-family A member 3 <sp|Q8R420|ABCA3_MOUSE>	0	0	0	0	0	0	0	0	0	0	0	0.941311	0 ± 0	0.157 ± 0.384	100	0.363217	191971	CHAIN 1-1704	-->lipid transport -->transmembrane transport -->transport	-->alveolar lamellar body -->alveolar lamellar body membrane -->extracellular space -->integral component of membrane -->intracellular membrane-bounded organelle -->plasma membrane	-->ATPase activity, coupled to transmembrane movement of substances -->ATP binding
Collagen alpha-1(VI) chain <sp|Q04857|CO6A1_MOUSE>	0	0	0	0	0	0	0	0	0	0	0.9921	0	0 ± 0	0.165 ± 0.405	100	0.363217	108489	CHAIN 1-1025	-->cell adhesion -->cellular response to amino acid stimulus -->osteoblast differentiation -->protein heterotrimerization	-->collagen trimer -->extracellular matrix -->extracellular region -->extracellular vesicular exosome -->lysosomal membrane -->proteinaceous extracellular matrix -->protein complex -->sarcolemma	-
Basement membrane-specific heparan sulfate proteoglycan core protein <sp|Q05793|PGBM_MOUSE>	0	0	0	0	0	0	0.978506	0	0	0	0	0	0 ± 0	0.163 ± 0.399	100	0.363217	398294	CHAIN 1-3707	-->angiogenesis -->brain development -->cardiac muscle tissue development -->cartilage development involved in endochondral bone morphogenesis -->chondrocyte differentiation -->embryonic skeletal system morphogenesis -->endochondral ossification -->extracellular matrix organization -->protein localization	-->basal lamina -->basement membrane -->extracellular matrix -->extracellular region -->Golgi lumen -->proteinaceous extracellular matrix	-->metal ion binding -->protease binding
ATP-dependent DNA helicase Q5 <sp|Q8VID5|RECQ5_MOUSE>	0	0	0	0	0	0	0	0	0.987035	0	0	0	0 ± 0	0.165 ± 0.403	100	0.363217			-	-	-
Schlafen family member 8 <sp|B1ARD8|SLFN8_MOUSE>	0	0	0	0	0	0	1.95701	1.96854	0.987035	0	0.9921	0	0 ± 0	0.984 ± 0.878	100	0.0404945			-	-	-
Protein CASC3 <sp|Q8K3W3|CASC3_MOUSE>	0	0	0	0	0	0	0.978506	0	0.987035	0	0	0	0 ± 0	0.328 ± 0.508	100	0.174693			-	-	-
Kinesin-like protein KIFC2 <sp|O08672|KIFC2_MOUSE>	0	0	0	0	0	0	0.978506	0	0	0	0	1.88262	0 ± 0	0.477 ± 0.792	100	0.20034			-	-	-
Sterol regulatory element-binding protein 1 <sp|Q9WTN3|SRBP1_MOUSE>	0	0	0	0	0	0	0.978506	0	0	0	0	0	0 ± 0	0.163 ± 0.399	100	0.363217			-	-	-
ELKS/Rab6-interacting/CAST family member 1 <sp|Q99MI1|RB6I2_MOUSE>	0	0	0	0.996521	0	0	0	0	0	0	0	0	0.166 ± 0.407	0 ± 0	-100	0.363217	128331	CHAIN 1-1120	-->I-kappaB phosphorylation -->protein transport -->retrograde transport, endosome to Golgi	-->cytoplasm -->Golgi membrane -->IkappaB kinase complex -->presynaptic active zone -->synapse	-->PDZ domain binding -->Rab GTPase binding
Cysteine--tRNA ligase, cytoplasmic <sp|Q9ER72|SYCC_MOUSE>	0	0	0	0	0.968045	0	0	0	0	0.97023	0	0	0.161 ± 0.395	0.162 ± 0.396	1.006	0.998759	94859.8	CHAIN 1-831	-->cysteinyl-tRNA aminoacylation	-->cytoplasm -->cytosol	-->ATP binding -->cysteine-tRNA ligase activity -->metal ion binding -->protein homodimerization activity -->tRNA binding
Zinc finger protein 280D <sp|Q68FE8|Z280D_MOUSE>	0	0	0	0	0	0	0	0	0	0.97023	0	0	0 ± 0	0.162 ± 0.396	100	0.363217	107836	CHAIN 1-974	-->axon guidance -->negative regulation of transcription, DNA-templated -->transcription, DNA-templated	-->nucleus	-->DNA binding -->metal ion binding -->transcriptional repressor activity, RNA polymerase II transcription regulatory region sequence-specific binding
Zinc finger protein AEBP2 <sp|Q9Z248|AEBP2_MOUSE>	1.01558	0.981065	1.02276	0	0	0	0.978506	0.984271	0	0	0	0	0.503 ± 0.551	0.327 ± 0.507	-1.538	0.57746			-	-	-
Cilia- and flagella-associated protein 52 <sp|Q5F201|CFA52_MOUSE>	0	0	0	0	0	0	0.978506	0	0	0	0	0	0 ± 0	0.163 ± 0.399	100	0.363217			-	-	-
BLOC-1-related complex subunit 6 <sp|Q9D6W8|BORC6_MOUSE>	0	0	0	0	0	0	0	0	0	0	0	0.941311	0 ± 0	0.157 ± 0.384	100	0.363217			-	-	-
Polycystic kidney disease protein 1-like 1 <sp|Q8R526|PK1L1_MOUSE>	0	0	0	0	0	0	0	0	0	0	0	0.941311	0 ± 0	0.157 ± 0.384	100	0.363217	290844	CHAIN 1-2615	-->detection of nodal flow -->determination of left/right symmetry -->heart development -->left/right axis specification -->left/right pattern formation	-->calcium channel complex -->ciliary membrane -->cilium -->nonmotile primary cilium	-->calcium channel activity
Gamma-tubulin complex component 6 <sp|G5E8P0|GCP6_MOUSE>	0	0	0	0	0	0	0	0	0.987035	0	0	0	0 ± 0	0.165 ± 0.403	100	0.363217	197192	CHAIN 1-1769	-->centrosome duplication -->cytoplasmic microtubule organization -->interphase microtubule nucleation by interphase microtubule organizing center -->meiotic nuclear division -->microtubule nucleation -->mitotic spindle assembly	-->centrosome -->equatorial microtubule organizing center -->extracellular exosome -->gamma-tubulin ring complex -->membrane -->microtubule -->spindle pole	-->gamma-tubulin binding -->microtubule binding -->structural constituent of cytoskeleton
tRNA (cytosine(72)-C(5))-methyltransferase NSUN6 <sp|Q7TS68|NSUN6_MOUSE>	0	0	0	0	0	0	0	0	0	0	0	0.941311	0 ± 0	0.157 ± 0.384	100	0.363217			-	-	-
Membrane-associated tyrosine- and threonine-specific cdc2-inhibitory kinase <sp|Q9ESG9|PMYT1_MOUSE>	0	0	0	0	0	0	0.978506	0.984271	0	0	0.9921	0	0 ± 0	0.492 ± 0.54	100	0.0755936			-	-	-
Dynein heavy chain 1, axonemal <sp|E9Q8T7|DYH1_MOUSE>	0	0	0	0	0	0	0	0	0	0	0.9921	0.941311	0 ± 0	0.322 ± 0.499	100	0.174872	487070	CHAIN 1-4250	-->cilium movement involved in cell motility -->epithelial cilium movement -->inner dynein arm assembly -->sperm motility	-->inner dynein arm -->sperm flagellum	-->ATPase activity -->ATP binding -->microtubule motor activity
Bifunctional coenzyme A synthase <sp|Q9DBL7|COASY_MOUSE>	0	0	0	0	0	0	0	0	0	0.97023	0	0.941311	0 ± 0	0.319 ± 0.494	100	0.174749	62023.2	CHAIN 1-563	-->coenzyme A biosynthetic process	-->cytoplasm -->extracellular exosome -->mitochondrial matrix -->nucleoplasm	-->ATP binding -->dephospho-CoA kinase activity -->pantetheine-phosphate adenylyltransferase activity
Sickle tail protein <sp|A2AQ25|SKT_MOUSE>	0	0	0	0	0	0	0	0.984271	0	0.97023	0	0.941311	0 ± 0	0.483 ± 0.529	100	0.0756597			-	-	-
Protein ZGRF1 <sp|Q0VGT4|ZGRF1_MOUSE>	2.03117	0.981065	1.02276	0.996521	0.968045	0	0.978506	0.984271	0	1.94046	0.9921	0	1 ± 0.643	0.816 ± 0.732	-1.225	0.653681			-	-	-
Exportin-5 <sp|Q924C1|XPO5_MOUSE>	0	0	0	0	0	0	0.978506	0	0	0	0	0	0 ± 0	0.163 ± 0.399	100	0.363217	136973	CHAIN 1-1204	-->positive regulation of RNA interference -->pre-miRNA export from nucleus -->protein export from nucleus	-->cytoplasm -->nucleoplasm -->nucleus -->RNA nuclear export complex	-->mRNA binding -->poly(A) RNA binding -->pre-miRNA binding -->pre-miRNA transporter activity -->protein transporter activity -->Ran GTPase binding -->tRNA binding
Low-density lipoprotein receptor-related protein 6 <sp|O88572|LRP6_MOUSE>	0	0.981065	0	0	0	0	0	0	0	0	0	0	0.164 ± 0.401	0 ± 0	-100	0.363217	180254	CHAIN 1-1613	-->anterior/posterior pattern specification -->axis elongation -->axis elongation involved in somitogenesis -->bone remodeling -->branching involved in mammary gland duct morphogenesis -->canonical Wnt signaling pathway -->canonical Wnt signaling pathway involved in cardiac neural crest cell differentiation involved in heart development -->canonical Wnt signaling pathway involved in positive regu…	-->Extracellular region or secreted Cytosol Plasma membrane Cytoskeleton Lysosome Endosome Peroxisome ER Golgi apparatus Nucleus Mitochondrion Manual annotation Automatic computational assertionGraphics by Christian Stolte; -->endoplasmic reticulum -->early endosome -->caveola -->plasma membrane -->Wnt-Frizzled-LRP5/6 complex -->cell surface -->cytoplasmic vesicle -->integral component of membran…	-->coreceptor activity involved in Wnt signaling pathway -->frizzled binding -->identical protein binding -->kinase inhibitor activity -->low-density lipoprotein particle receptor activity -->protein homodimerization activity -->receptor binding -->toxin transmembrane transporter activity -->Wnt-activated receptor activity -->Wnt-protein binding
Proteasome subunit beta type-11 <sp|Q8BG41|PSB11_MOUSE>	0	0	0	0	0	0	0	0	0	0	0	0.941311	0 ± 0	0.157 ± 0.384	100	0.363217	33219.7	CHAIN 1-302	-->antigen processing and presentation of exogenous peptide antigen via MHC class I, TAP-dependent -->CD8-positive, alpha-beta T cell differentiation -->proteolysis -->proteolysis involved in cellular protein catabolic process	-->cytosol -->nucleus -->proteasome core complex	-->peptidase activity -->threonine-type endopeptidase activity
Laminin subunit gamma-1 <sp|P02468|LAMC1_MOUSE>	0	0	0	0	0	0	0	0.984271	0	0	0	0	0 ± 0	0.164 ± 0.402	100	0.363217	177298	CHAIN 1-1607	-->cell adhesion -->cell migration -->extracellular matrix disassembly -->hemidesmosome assembly -->neuron projection development -->protein complex assembly	-->basal lamina -->basement membrane -->extracellular region -->laminin-10 complex	-->extracellular matrix structural constituent -->glycosphingolipid binding
Dentin matrix acidic phosphoprotein 1 <sp|O55188|DMP1_MOUSE>	0	0	0	0	0	0	0	0	0.987035	0	0	0	0 ± 0	0.165 ± 0.403	100	0.363217			-	-	-
Chondroitin sulfate proteoglycan 4 <sp|Q8VHY0|CSPG4_MOUSE>	0	0	0	0	0	0	0	0.984271	0	0	0	0	0 ± 0	0.164 ± 0.402	100	0.363217	252309	CHAIN 1-2327	-->activation of MAPK activity -->angiogenesis -->cell proliferation -->glial cell migration -->intracellular signal transduction -->positive regulation of peptidyl-tyrosine phosphorylation -->tissue remodeling -->transmembrane receptor protein tyrosine kinase signaling pathway	-->apical plasma membrane -->cell projection -->cell surface -->extracellular exosome -->focal adhesion -->integral component of plasma membrane -->intracellular -->lamellipodium membrane -->plasma membrane	-->protein kinase binding -->signal transducer activity
Tetratricopeptide repeat protein 22 <sp|Q8C159|TTC22_MOUSE>	0	0	0	0.996521	0.968045	0	0	0	0	0	0	0	0.327 ± 0.507	0 ± 0	-100	0.174744			-	-	-
Gamma-tubulin complex component 2 <sp|Q921G8|GCP2_MOUSE>	0	0.981065	1.02276	0	0	0.983527	0	0	0.987035	0	0.9921	0	0.498 ± 0.546	0.33 ± 0.511	-1.509	0.594041	103223	CHAIN 1-905	-->microtubule cytoskeleton organization	-->centrosome -->cytoplasm -->membrane -->microtubule -->nucleoplasm -->spindle pole	-
E3 ubiquitin-protein ligase HERC2 <sp|Q4U2R1|HERC2_MOUSE>	1.01558	0	0	0	0	0	0	0	0	0	0.9921	0	0.169 ± 0.415	0.165 ± 0.405	-1.024	0.987128	527456	CHAIN 1-4836	-->cellular response to DNA damage stimulus -->DNA repair -->protein ubiquitination -->protein ubiquitination involved in ubiquitin-dependent protein catabolic process -->spermatogenesis	-->centriole -->cytoplasm -->membrane -->mitochondrial inner membrane -->nucleus	-->heme binding -->ligase activity -->SUMO binding -->ubiquitin protein ligase binding -->ubiquitin-protein transferase activity -->zinc ion binding
CST complex subunit CTC1 <sp|Q5SUQ9|CTC1_MOUSE>	0	0.981065	1.02276	0	0	0	0.978506	0	0	0	0	0.941311	0.334 ± 0.518	0.32 ± 0.496	-1.044	0.962778	134028	CHAIN 1-1212	-->aging -->bone marrow development -->cellular response to DNA damage stimulus -->chromosome organization -->hematopoietic stem cell proliferation -->multicellular organism growth -->negative regulation of telomerase activity -->positive regulation of DNA replication -->positive regulation of fibroblast proliferation -->regulation of G2/M transition of mitotic cell cycle -->regulation of telomer…	-->CST complex -->nuclear chromosome, telomeric region -->nucleus	-->G-rich strand telomeric DNA binding -->single-stranded DNA binding -->telomerase inhibitor activity -->telomeric DNA binding
Cyclin-F <sp|P51944|CCNF_MOUSE>	1.01558	0	0	0	0	0.983527	0	0	0.987035	0	0	0	0.333 ± 0.516	0.165 ± 0.403	-2.018	0.543076	86622.9	CHAIN 1-777	-->cell division -->mitotic nuclear division -->negative regulation of centrosome duplication -->placenta development -->protein ubiquitination -->re-entry into mitotic cell cycle -->SCF-dependent proteasomal ubiquitin-dependent protein catabolic process	-->centriole -->nucleus -->SCF ubiquitin ligase complex	-
Mitogen-activated protein kinase 12 <sp|O08911|MK12_MOUSE>	1.01558	0.981065	0	0	0	0.983527	0	0	0	0	0	0	0.497 ± 0.544	0 ± 0	-100	0.07564			-	-	-
Synergin gamma <sp|Q5SV85|SYNRG_MOUSE>	0	0	0	0	0	0	0	0	0	0	0.9921	0	0 ± 0	0.165 ± 0.405	100	0.363217			-	-	-
Zinc finger FYVE domain-containing protein 26 <sp|Q5DU37|ZFY26_MOUSE>	0	0	0	0.996521	0	0	0	0	0.987035	0.97023	0	0	0.166 ± 0.407	0.326 ± 0.505	1.964	0.559551	282961	CHAIN 1-2529	-->cytokinesis -->double-strand break repair via homologous recombination	-->centrosome -->lysosomal membrane -->midbody	-->metal ion binding -->phosphatidylinositol-3-phosphate binding
Nesprin-2 <sp|Q6ZWQ0|SYNE2_MOUSE>	0	0	0	0	0	0	0	0	0	0.97023	0	0	0 ± 0	0.162 ± 0.396	100	0.363217	782725	CHAIN 1-6874	-->centrosome localization -->cytoskeletal anchoring at nuclear membrane -->establishment or maintenance of cell polarity -->fibroblast migration -->nuclear envelope organization -->nuclear migration -->nuclear migration along microfilament -->positive regulation of cell migration -->protein localization to nucleus	-->aggresome -->cytoplasm -->extracellular vesicular exosome -->filopodium membrane -->focal adhesion -->integral component of membrane -->intermediate filament cytoskeleton -->lamellipodium membrane -->LINC complex -->mitochondrion -->nuclear envelope -->nuclear lumen -->nuclear membrane -->nuclear outer membrane -->nucleoplasm	-->actin binding
Insulin receptor substrate 2 <sp|P81122|IRS2_MOUSE>	1.01558	0	1.02276	0	0	0.983527	0	1.96854	0	0	0	0	0.504 ± 0.552	0.328 ± 0.804	-1.537	0.669715	136763	CHAIN 1-1321	-->brain development -->cell proliferation -->cellular response to glucose stimulus -->cellular response to insulin stimulus -->insulin receptor signaling pathway -->mammary gland development -->negative regulation of B cell apoptotic process -->negative regulation of kinase activity -->negative regulation of plasma membrane long-chain fatty acid transport -->phosphatidylinositol-mediated signali…	-->cytosol -->plasma membrane	-->insulin receptor binding -->phosphatidylinositol 3-kinase binding -->protein kinase binding -->signal transducer activity
Dymeclin <sp|Q8CHY3|DYM_MOUSE>	0	0	0	0	0	0	0.978506	0	0	0	0	0	0 ± 0	0.163 ± 0.399	100	0.363217	75848.2	CHAIN 1-669	-->bone development -->Golgi organization	-->Extracellular region or secreted Cytosol Plasma membrane Cytoskeleton Lysosome Endosome Peroxisome ER Golgi apparatus Nucleus Mitochondrion Manual annotation Automatic computational assertionGraphics by Christian Stolte; -->Golgi apparatus -->cytoplasm -->membrane	-->enzyme binding
Kalirin <sp|A2CG49|KALRN_MOUSE>	0	0.981065	0	0	0	0	0	0	0	0	0	0	0.164 ± 0.401	0 ± 0	-100	0.363217	337000	CHAIN 1-2964	-->adult locomotory behavior -->behavioral fear response -->behavioral response to cocaine -->behavioral response to formalin induced pain -->habituation -->lactation -->maternal behavior -->maternal process involved in parturition -->memory -->negative regulation of growth hormone secretion -->neuromuscular junction development -->positive regulation of dendritic spine development -->positive re…	-->Extracellular region or secreted Cytosol Plasma membrane Cytoskeleton Lysosome Endosome Peroxisome ER Golgi apparatus Nucleus Mitochondrion Manual annotation Automatic computational assertionGraphics by Christian Stolte; -->cytoskeleton -->cytosol -->nucleoplasm -->postsynaptic density	-->ATP binding -->guanyl-nucleotide exchange factor activity -->metal ion binding -->protein serine/threonine kinase activity -->Rac guanyl-nucleotide exchange factor activity
Centrosome-associated protein CEP250 <sp|Q60952|CP250_MOUSE>	0	0	0	0	0	0	0.978506	0	0.987035	0.97023	0	0.941311	0 ± 0	0.646 ± 0.501	100	0.025073	276814	CHAIN 1-2414	-->centriole-centriole cohesion -->mitotic cell cycle -->protein localization -->protein localization to organelle -->regulation of centriole-centriole cohesion	-->centriole -->centrosome -->cilium -->extracellular vesicular exosome -->perinuclear region of cytoplasm -->protein complex -->spindle pole centrosome	-->protein C-terminus binding -->protein domain specific binding -->protein kinase binding
PH-interacting protein <sp|Q8VDD9|PHIP_MOUSE>	0	0	0	0	0	0	0.978506	0	0	0	0	0	0 ± 0	0.163 ± 0.399	100	0.363217			-	-	-
Solute carrier family 5 member 4A <sp|Q9ET37|S5A4A_MOUSE>	0	0	0	0.996521	0	0	0.978506	0	0.987035	0.97023	0	0	0.166 ± 0.407	0.489 ± 0.536	2.946	0.268554			-	-	-
Protein scribble homolog <sp|Q80U72|SCRIB_MOUSE>	0	0	0	0	0	0	0	0.984271	0	0	0	0	0 ± 0	0.164 ± 0.402	100	0.363217	174059	CHAIN 1-1612	-->activation of GTPase activity -->apoptotic process involved in morphogenesis -->astrocyte cell migration -->asymmetric protein localization -->auditory receptor cell morphogenesis -->auditory receptor cell stereocilium organization -->cell migration -->cell proliferation -->cochlear nucleus development -->establishment of apical/basal cell polarity -->mammary gland duct morphogenesis -->morpho…	-->basolateral plasma membrane -->cell-cell adherens junction -->cell-cell junction -->cytosol -->extracellular vesicular exosome -->lamellipodium -->myelin sheath abaxonal region -->nucleoplasm -->plasma membrane -->postsynaptic membrane -->presynaptic membrane -->Scrib-APC-beta-catenin complex	-
Hedgehog-interacting protein <sp|Q7TN16|HHIP_MOUSE>	0	0	0	0	0	0	0	0	0	0	0	0.941311	0 ± 0	0.157 ± 0.384	100	0.363217			-	-	-
Lipoxygenase homology domain-containing protein 1 <sp|C8YR32|LOXH1_MOUSE>	0	0	0	0	0	0	0	0.984271	0	0	0	0	0 ± 0	0.164 ± 0.402	100	0.363217			-	-	-
DNA replication ATP-dependent helicase/nuclease DNA2 <sp|Q6ZQJ5|DNA2_MOUSE>	0	0	0	0	0	0	0	0.984271	0	0.97023	0	0	0 ± 0	0.326 ± 0.505	100	0.174702	119447	CHAIN 1-1062	-->base-excision repair -->DNA double-strand break processing -->DNA replication -->DNA replication, Okazaki fragment processing -->DNA replication, removal of RNA primer -->DNA replication checkpoint -->mitochondrial DNA repair -->mitochondrial DNA replication -->mitotic telomere maintenance via semi-conservative replication -->nucleic acid phosphodiester bond hydrolysis -->positive regulation o…	-->Extracellular region or secreted Cytosol Plasma membrane Cytoskeleton Lysosome Endosome Peroxisome ER Golgi apparatus Nucleus Mitochondrion Manual annotation Automatic computational assertionGraphics by Christian Stolte; -->gamma DNA polymerase complex -->mitochondrial nucleoid -->mitochondrion -->nuclear chromosome, telomeric region -->nucleus	-->4 iron, 4 sulfur cluster binding -->5'-3' DNA helicase activity -->5'-flap endonuclease activity -->ATP binding -->DNA binding -->DNA helicase activity -->metal ion binding -->nuclease activity -->single-stranded DNA-dependent ATPase activity -->site-specific endodeoxyribonuclease activity, specific for altered base
Cytosolic phospholipase A2 <sp|P47713|PA24A_MOUSE>	0	0	0	0	0	0	0	0	0.987035	0	0	0	0 ± 0	0.165 ± 0.403	100	0.363217	85222.3	CHAIN 1-748	-->aging -->arachidonic acid metabolic process -->arachidonic acid secretion -->cellular response to antibiotic -->decidualization -->icosanoid biosynthetic process -->luteolysis -->ovulation from ovarian follicle -->phospholipid catabolic process -->positive regulation of apoptotic process -->positive regulation of bone mineralization -->positive regulation of cell proliferation -->positive regu…	-->cytoplasm -->cytosol -->endoplasmic reticulum -->Golgi apparatus -->nucleus -->perinuclear region of cytoplasm -->zymogen granule	-->calcium-dependent phospholipase A2 activity -->calcium-dependent phospholipid binding -->calcium ion binding -->lysophospholipase activity -->phospholipase A2 activity
Beta-1,4-galactosyltransferase 7 <sp|Q8R087|B4GT7_MOUSE>	0	0	0	0	0	0	0.978506	0	0	0	0	0	0 ± 0	0.163 ± 0.399	100	0.363217	37754.3	CHAIN 1-327	-->extracellular fibril organization -->glycosaminoglycan biosynthetic process -->negative regulation of fibroblast proliferation -->protein N-linked glycosylation -->proteoglycan metabolic process	-->extracellular matrix -->Golgi apparatus -->Golgi cisterna membrane -->integral component of membrane	-->beta-N-acetylglucosaminylglycopeptide beta-1,4-galactosyltransferase activity -->galactosyltransferase activity -->manganese ion binding -->xylosylprotein 4-beta-galactosyltransferase activity
Leucine-rich PPR motif-containing protein, mitochondrial <sp|Q6PB66|LPPRC_MOUSE>	0	0	0	0	0	0	0	0	0	0	0.9921	0	0 ± 0	0.165 ± 0.405	100	0.363217	156615	CHAIN 1-1392	-->mRNA transport -->negative regulation of mitochondrial RNA catabolic process -->regulation of mitochondrial translation -->regulation of transcription, DNA-templated -->transcription, DNA-templated	-->condensed nuclear chromosome -->cytoplasm -->cytoskeleton -->membrane -->microtubule -->mitochondrial nucleoid -->mitochondrion -->nucleus -->perinuclear region of cytoplasm -->ribonucleoprotein complex	-->beta-tubulin binding -->poly(A) RNA binding -->RNA binding -->single-stranded DNA binding
Replication factor C subunit 1 <sp|P35601|RFC1_MOUSE>	0	0	0	0	0	0	0	0	0	0	0	0.941311	0 ± 0	0.157 ± 0.384	100	0.363217			-	-	-
Cortactin-binding protein 2 <sp|B9EJA2|CTTB2_MOUSE>	0	0	0	0	0	0	0	0	0.987035	0	0	0	0 ± 0	0.165 ± 0.403	100	0.363217			-	-	-
Collagen alpha-4(IV) chain <sp|Q9QZR9|CO4A4_MOUSE>	0	0	0	0	0	0	0.978506	0	0	0	0	0	0 ± 0	0.163 ± 0.399	100	0.363217	164096	CHAIN 1-1682	-->glomerular basement membrane development	-->basal lamina -->basement membrane -->collagen type IV trimer	-->extracellular matrix structural constituent
Double-stranded RNA-specific adenosine deaminase <sp|Q99MU3|DSRAD_MOUSE>	0	0	0	0	0	0	0	0	0	0	0	0.941311	0 ± 0	0.157 ± 0.384	100	0.363217	130447	CHAIN 1-1178	-->adenosine to inosine editing -->base conversion or substitution editing -->cellular response to virus -->defense response to virus -->definitive hemopoiesis -->erythrocyte differentiation -->hematopoietic progenitor cell differentiation -->hematopoietic stem cell homeostasis -->innate immune response -->in utero embryonic development -->miRNA loading onto RISC involved in gene silencing by miR…	-->cytoplasm -->membrane -->nucleolus -->nucleoplasm -->nucleus -->supraspliceosomal complex	-->double-stranded RNA adenosine deaminase activity -->left-handed Z-DNA binding -->metal ion binding -->poly(A) RNA binding
Breast cancer type 2 susceptibility protein homolog <sp|P97929|BRCA2_MOUSE>	0	0	0	0	0	0	0	0.984271	0	0	0	0	0 ± 0	0.164 ± 0.402	100	0.363217	370664	CHAIN 1-3329	-->brain development -->cell aging -->cell proliferation -->cellular response to DNA damage stimulus -->centrosome duplication -->chordate embryonic development -->chromosome organization -->cytokinesis -->DNA damage response, signal transduction by p53 class mediator resulting in transcription of p21 class mediator -->double-strand break repair -->double-strand break repair via homologous recomb…	-->BRCA2-MAGE-D1 complex -->centrosome -->cytoplasm -->nucleoplasm -->nucleus -->protein complex -->secretory granule	-->gamma-tubulin binding -->H3 histone acetyltransferase activity -->H4 histone acetyltransferase activity -->protease binding -->single-stranded DNA binding
Alanine--tRNA ligase, cytoplasmic <sp|Q8BGQ7|SYAC_MOUSE>	0	0	0	0	0	0	0	0	0	0.97023	0.9921	0	0 ± 0	0.327 ± 0.507	100	0.174721	106909	CHAIN 1-968	-->alanyl-tRNA aminoacylation -->cellular response to unfolded protein -->cerebellar Purkinje cell layer development -->endoplasmic reticulum unfolded protein response -->hair follicle development -->negative regulation of neuron apoptotic process -->neuromuscular process -->neuromuscular process controlling balance -->protein folding -->regulation of translational fidelity -->response to amino a…	-->cytoplasm -->extracellular vesicular exosome	-->alanine-tRNA ligase activity -->amino acid binding -->aminoacyl-tRNA editing activity -->ATP binding -->tRNA binding -->zinc ion binding
CLK4-associating serine/arginine rich protein <sp|Q8CFC7|CLASR_MOUSE>	0	0	0	0	0	0	0.978506	0	0	0	0	0	0 ± 0	0.163 ± 0.399	100	0.363217			-	-	-
Nipped-B-like protein <sp|Q6KCD5|NIPBL_MOUSE>	0	0	0	0	0	0	0.978506	0	0	0	0	0	0 ± 0	0.163 ± 0.399	100	0.363217	315450	CHAIN 1-2798	-->brain development -->cellular protein localization -->cellular response to DNA damage stimulus -->cellular response to X-ray -->cognition -->cohesin loading -->developmental growth -->ear morphogenesis -->embryonic cranial skeleton morphogenesis -->embryonic digestive tract morphogenesis -->embryonic forelimb morphogenesis -->embryonic viscerocranium morphogenesis -->external genitalia morphog…	-->Extracellular region or secreted Cytosol Plasma membrane Cytoskeleton Lysosome Endosome Peroxisome ER Golgi apparatus Nucleus Mitochondrion Manual annotation Automatic computational assertionGraphics by Christian Stolte; -->integrator complex -->nucleus -->Scc2-Scc4 cohesin loading complex -->SMC loading complex -->chromatin	-->chromatin binding -->chromo shadow domain binding -->histone deacetylase binding -->mediator complex binding -->protein C-terminus binding -->protein N-terminus binding
Ubiquitin carboxyl-terminal hydrolase 34 <sp|Q6ZQ93|UBP34_MOUSE>	0	0	0	0	0	0	0	0	0	0.97023	0	0	0 ± 0	0.162 ± 0.396	100	0.363217	408214	CHAIN 1-3582	-->positive regulation of canonical Wnt signaling pathway -->proteasome-mediated ubiquitin-dependent protein catabolic process -->protein deubiquitination -->protein K48-linked deubiquitination -->regulation of proteasomal protein catabolic process -->Wnt signaling pathway	-->cytoplasm -->nucleus	-->cysteine-type endopeptidase activity -->ubiquitin-specific protease activity
Collagen alpha-6(VI) chain <sp|Q8C6K9|CO6A6_MOUSE>	0	0	0	0	0	0	0	0	0	0.97023	0.9921	0	0 ± 0	0.327 ± 0.507	100	0.174721	246323	CHAIN 1-2265	-->cell adhesion	-->collagen trimer -->extracellular matrix -->proteinaceous extracellular matrix	-
Collagen alpha-1(II) chain <sp|P28481|CO2A1_MOUSE>	0	0	0	0	0	0	0	0	0	0	0	0.941311	0 ± 0	0.157 ± 0.384	100	0.363217			-	-	-
Peroxisomal acyl-coenzyme A oxidase 1 <sp|Q9R0H0|ACOX1_MOUSE>	0	0.981065	0	0	0	0.983527	0	0	0.987035	0	0	0	0.327 ± 0.507	0.165 ± 0.403	-1.982	0.552324	74648.7	CHAIN 1-661	-->fatty acid beta-oxidation -->fatty acid beta-oxidation using acyl-CoA oxidase -->fatty acid oxidation -->generation of precursor metabolites and energy -->lipid homeostasis -->peroxisome fission -->positive regulation of cholesterol homeostasis -->prostaglandin metabolic process -->spermatogenesis -->very long-chain fatty acid metabolic process	-->cytoplasm -->mitochondrion -->peroxisomal membrane -->peroxisome	-->acyl-CoA dehydrogenase activity -->acyl-CoA oxidase activity -->FAD binding -->fatty acid binding -->palmitoyl-CoA oxidase activity -->PDZ domain binding
Putative sperm motility kinase W <sp|Q8C0V7|SMKW_MOUSE>	0	0	0	0	0.968045	0	0	0	0	0	0	0	0.161 ± 0.395	0 ± 0	-100	0.363217			-	-	-
Protein RUFY3 <sp|Q9D394|RUFY3_MOUSE>	0	0	0	0	0	0	0	0	0	0.97023	0	0	0 ± 0	0.162 ± 0.396	100	0.363217	53007	CHAIN 1-469	-->negative regulation of axonogenesis -->positive regulation of axonogenesis -->regulation of axonogenesis	-->axon -->dendrite -->filopodium -->growth cone -->neuronal cell body	-
Probable 28S rRNA (cytosine-C(5))-methyltransferase <sp|Q922K7|NOP2_MOUSE>	0	0	0	0	0	0	0	0.984271	0	0	0	0	0 ± 0	0.164 ± 0.402	100	0.363217	86751.8	CHAIN 1-793	-->rRNA processing	-->nucleolus	-->poly(A) RNA binding -->S-adenosylmethionine-dependent methyltransferase activity
Low-density lipoprotein receptor-related protein 4 <sp|Q8VI56|LRP4_MOUSE>	0	0	0	0	0	0	0.978506	0.984271	0	0	0	0.941311	0 ± 0	0.484 ± 0.53	100	0.0756689	211954	CHAIN 1-1905	-->anatomical structure development -->dendrite morphogenesis -->dorsal/ventral pattern formation -->embryonic digit morphogenesis -->embryonic limb morphogenesis -->endocytosis -->hair follicle development -->kidney development -->limb development -->negative regulation of axonogenesis -->negative regulation of canonical Wnt signaling pathway -->negative regulation of ossification -->negative re…	-->cell surface -->dendrite -->flotillin complex -->integral component of membrane -->neuromuscular junction -->neuronal cell body -->plasma membrane -->postsynaptic density -->synaptic membrane	-->calcium ion binding -->protein homodimerization activity -->receptor tyrosine kinase binding -->scaffold protein binding
DNA topoisomerase 2-alpha <sp|Q01320|TOP2A_MOUSE>	0	0	0	0	0	0	0	0	0	0.97023	0.9921	0	0 ± 0	0.327 ± 0.507	100	0.174721	172790	CHAIN 1-1528	-->apoptotic chromosome condensation -->cellular response to DNA damage stimulus -->chromosome condensation -->chromosome segregation -->DNA ligation -->DNA topological change -->DNA unwinding involved in DNA replication -->embryonic cleavage -->hematopoietic progenitor cell differentiation -->mitotic DNA integrity checkpoint -->mitotic recombination -->positive regulation of apoptotic process --…	-->centriole -->condensed chromosome -->DNA topoisomerase complex (ATP-hydrolyzing) -->nuclear chromosome -->nucleolus -->nucleoplasm -->nucleus -->protein complex	-->ATP binding -->chromatin binding -->DNA binding -->DNA binding, bending -->DNA-dependent ATPase activity -->DNA topoisomerase type II (ATP-hydrolyzing) activity -->drug binding -->enzyme binding -->histone deacetylase binding -->magnesium ion binding -->poly(A) RNA binding -->protein C-terminus binding -->protein heterodimerization activity -->protein homodimerization activity -->protein kinas…
Lon protease homolog, mitochondrial <sp|Q8CGK3|LONM_MOUSE>	0	0	0	0	0	0	0	0.984271	0.987035	0	0	0	0 ± 0	0.329 ± 0.509	100	0.174688	105843	CHAIN 1-949	-->aging -->ATP catabolic process -->cellular response to oxidative stress -->chaperone-mediated protein complex assembly -->misfolded or incompletely synthesized protein catabolic process -->mitochondrion organization -->oxidation-dependent protein catabolic process -->protein homooligomerization -->proteolysis -->regulation of mitochondrial DNA replication -->response to aluminum ion -->respons…	-->mitochondrial matrix -->mitochondrial nucleoid -->mitochondrion	-->ADP binding -->ATPase activity -->ATP binding -->ATP-dependent peptidase activity -->G-quadruplex DNA binding -->mitochondrial light strand promoter anti-sense binding -->sequence-specific DNA binding -->serine-type endopeptidase activity -->single-stranded DNA binding -->single-stranded RNA binding
Retinoic acid-induced protein 1 <sp|Q61818|RAI1_MOUSE>	0	0	0	0	0	0	0.978506	0	0	0	0	0	0 ± 0	0.163 ± 0.399	100	0.363217			-	-	-
StAR-related lipid transfer protein 9 <sp|Q80TF6|STAR9_MOUSE>	0	0	0	0	0	0	0	0	0	0	0.9921	0.941311	0 ± 0	0.322 ± 0.499	100	0.174872	500243	CHAIN 1-4561	-->metabolic process -->microtubule-based movement -->spindle assembly	-->centriole -->cytoplasm -->Golgi apparatus -->kinesin complex -->nucleoplasm -->nucleus	-->ATPase activity -->ATP binding -->ATP-dependent microtubule motor activity, plus-end-directed -->lipid binding -->microtubule binding -->microtubule motor activity
CUB and sushi domain-containing protein 1 <sp|Q923L3|CSMD1_MOUSE>	0	0	0	0	0	0	0	0	0	0.97023	0	0	0 ± 0	0.162 ± 0.396	100	0.363217	387862	CHAIN 1-3564	-->glucose homeostasis -->startle response	-->integral component of membrane	-
LIM and calponin homology domains-containing protein 1 <sp|Q3UH68|LIMC1_MOUSE>	0	0	0	0	0	0	0	0	0	0	0	0.941311	0 ± 0	0.157 ± 0.384	100	0.363217			-	-	-
Glutamine--fructose-6-phosphate aminotransferase [isomerizing] 2 <sp|Q9Z2Z9|GFPT2_MOUSE>	0	0.981065	0	0	0	0	0	0	0	0	0	0	0.164 ± 0.401	0 ± 0	-100	0.363217	77008.6	CHAIN 1-682	-->cellular response to leukemia inhibitory factor -->fructose 6-phosphate metabolic process -->glutamine metabolic process -->protein N-linked glycosylation -->UDP-N-acetylglucosamine biosynthetic process -->UDP-N-acetylglucosamine metabolic process	-	-->carbohydrate derivative binding -->glutamine-fructose-6-phosphate transaminase (isomerizing) activity
Pecanex-like protein 1 <sp|Q9QYC1|PCX1_MOUSE>	0	0	0	0	0	0	0	0	0	0.97023	0	0	0 ± 0	0.162 ± 0.396	100	0.363217	258147	CHAIN 1-2344	-	-->integral component of membrane	-
Inhibitor of Bruton tyrosine kinase <sp|Q6ZPR6|IBTK_MOUSE>	0	0	0	0	0	0	0	0.984271	0	0	0	0	0 ± 0	0.164 ± 0.402	100	0.363217			-	-	-
Protein DBF4 homolog A <sp|Q9QZ41|DBF4A_MOUSE>	0	0	0	0	0	0	0	0	0	0	0.9921	0	0 ± 0	0.165 ± 0.405	100	0.363217			-	-	-
Cytoplasmic FMR1-interacting protein 1 <sp|Q7TMB8|CYFP1_MOUSE>	0	0	0	0	0	0	0	0.984271	0	0	0	0	0 ± 0	0.164 ± 0.402	100	0.363217	145241	CHAIN 1-1253	-->axon extension -->cognition -->lamellipodium assembly -->positive regulation of Arp2/3 complex-mediated actin nucleation -->Rac protein signal transduction -->regulation of cell shape -->ruffle organization	-->extracellular exosome -->focal adhesion -->lamellipodium -->mRNA cap binding complex -->neuron projection -->perinuclear region of cytoplasm -->ruffle -->SCAR complex -->synapse	-->actin filament binding -->profilin binding -->protein complex binding -->Rac GTPase binding
Oxysterol-binding protein-related protein 3 <sp|Q9DBS9|OSBL3_MOUSE>	0	0	0	0	0	0	0.978506	0.984271	0.987035	0	0	0	0 ± 0	0.492 ± 0.539	100	0.0755896			-	-	-
Plexin-B3 <sp|Q9QY40|PLXB3_MOUSE>	0	0	0	0	1.93609	0.983527	0	0.984271	0.987035	0	0	0	0.487 ± 0.812	0.329 ± 0.509	-1.48	0.696264	208366	CHAIN 1-1902	-->cell chemotaxis -->negative regulation of cell adhesion -->negative regulation of cell migration -->negative regulation of GTPase activity -->negative regulation of lamellipodium assembly -->nervous system development -->positive chemotaxis -->positive regulation of endothelial cell proliferation -->semaphorin-plexin signaling pathway	-->integral component of membrane -->intracellular -->plasma membrane	-->protein domain specific binding -->Rho GDP-dissociation inhibitor binding -->semaphorin receptor activity
Meiosis regulator and mRNA stability factor 1 <sp|Q8BJ34|MARF1_MOUSE>	1.01558	0	0	0	0	0	0	0	0.987035	0	0	0	0.169 ± 0.415	0.165 ± 0.403	-1.024	0.984314			-	-	-
Leucine-rich repeat-containing protein 24 <sp|Q8BHA1|LRC24_MOUSE>	0	0	0	0	0	0	0	0	0	0	0	0.941311	0 ± 0	0.157 ± 0.384	100	0.363217	56334.2	CHAIN 1-521	-	-->integral component of membrane	-
Zinc finger protein 292 <sp|Q9Z2U2|ZN292_MOUSE>	0	0	0	0	0	0	0	0	0.987035	0	0	0	0 ± 0	0.165 ± 0.403	100	0.363217	301048	CHAIN 1-2698	-	-->nucleus	-->DNA binding -->metal ion binding -->transcriptional activator activity, RNA polymerase II core promoter proximal region sequence-specific binding
Microtubule-associated serine/threonine-protein kinase 4 <sp|Q811L6|MAST4_MOUSE>	0	0	0	0	0	0.983527	0	0	0.987035	0	0	0	0.164 ± 0.402	0.165 ± 0.403	1.006	0.998041			-	-	-
Nuclear pore complex protein Nup98-Nup96 <sp|Q6PFD9|NUP98_MOUSE>	0	0	0	0	0.968045	0.983527	0	0.984271	0	0	0	0	0.325 ± 0.504	0.164 ± 0.402	-1.982	0.55441	197241	CHAIN 1-1816	-->DNA replication -->mRNA transport -->nuclear pore complex assembly -->protein transport	-->nuclear envelope -->nuclear inclusion body -->nuclear membrane -->nuclear periphery -->nuclear pore -->nuclear pore nuclear basket -->nuclear pore outer ring -->nucleus	-->structural constituent of nuclear pore
Charged multivesicular body protein 7 <sp|Q8R1T1|CHMP7_MOUSE>	0	0	0	0	0	0	0	0.984271	0	0	0	0	0 ± 0	0.164 ± 0.402	100	0.363217	50632.7	CHAIN 1-451	-->cell separation after cytokinesis -->exit from mitosis -->late endosome to vacuole transport -->mitotic metaphase plate congression -->nuclear envelope reassembly -->nucleus organization -->protein localization to chromatin	-->Extracellular region or secreted Cytosol Plasma membrane Cytoskeleton Lysosome Endosome Peroxisome ER Golgi apparatus Nucleus Mitochondrion Manual annotation Automatic computational assertionGraphics by Christian Stolte; -->cytosol -->ESCRT III complex -->nuclear envelope -->nucleus -->chromatin	-->protein transporter activity
RNA-binding region-containing protein 3 <sp|Q3UZ01|RNPC3_MOUSE>	0	0	0	0	0	0	0	0.984271	0	0	0	0	0 ± 0	0.164 ± 0.402	100	0.363217			-	-	-
Nuclear receptor coactivator 6 <sp|Q9JL19|NCOA6_MOUSE>	0	0.981065	0	0	0	0	0	0	0	0	0	0	0.164 ± 0.401	0 ± 0	-100	0.363217			-	-	-
Brother of CDO <sp|Q6AZB0|BOC_MOUSE>	0	0	0	0	0	0	0.978506	0	0	0	0	0	0 ± 0	0.163 ± 0.399	100	0.363217			-	-	-
Tyrosine-protein kinase receptor Tie-1 <sp|Q06806|TIE1_MOUSE>	0	0	0	0	0	0	0	0.984271	0	0	0	0	0 ± 0	0.164 ± 0.402	100	0.363217			-	-	-
Uridine-cytidine kinase-like 1 <sp|Q91YL3|UCKL1_MOUSE>	0	0	0	0	0	0	0	0	0	0	0.9921	0	0 ± 0	0.165 ± 0.405	100	0.363217			-	-	-
Protein crumbs homolog 2 <sp|Q80YA8|CRUM2_MOUSE>	1.01558	0	0	0	0	0	0	0	0	0.97023	0	0	0.169 ± 0.415	0.162 ± 0.396	-1.043	0.974876			-	-	-
Homogentisate 1,2-dioxygenase <sp|O09173|HGD_MOUSE>	0	0	0	0	0	0	0	0	0	0.97023	0	0	0 ± 0	0.162 ± 0.396	100	0.363217	49959.9	CHAIN 1-445	-->cellular amino acid metabolic process -->L-phenylalanine catabolic process -->tyrosine catabolic process	-->extracellular vesicular exosome	-->homogentisate 1,2-dioxygenase activity -->metal ion binding
Secretory phospholipase A2 receptor <sp|Q62028|PLA2R_MOUSE>	1.01558	0	0	0	0	0.983527	0	0	0	0	0	0.941311	0.333 ± 0.516	0.157 ± 0.384	-2.121	0.518646	170512	CHAIN 1-1487	-->cytokine production -->negative regulation of arachidonic acid secretion -->negative regulation of phospholipase A2 activity -->oxidative stress-induced premature senescence -->positive regulation of arachidonic acid secretion -->positive regulation of DNA damage response, signal transduction by p53 class mediator -->reactive oxygen species metabolic process -->receptor-mediated endocytosis --…	-->cell surface -->extracellular exosome -->extracellular region -->integral component of membrane -->plasma membrane -->receptor complex	-->carbohydrate binding -->phospholipase binding -->receptor activity
Ankyrin repeat and IBR domain-containing protein 1 <sp|Q6ZPS6|AKIB1_MOUSE>	0	0	0	0	0	0	0	0	0.987035	0	0	0	0 ± 0	0.165 ± 0.403	100	0.363217			-	-	-
Leucine-rich repeat and IQ domain-containing protein 1 <sp|Q0P5X1|LRIQ1_MOUSE>	0	0.981065	0	0.996521	0	0	0	0	0.987035	0	0	0	0.33 ± 0.511	0.165 ± 0.403	-2	0.548796			-	-	-
Microtubule organization protein AKNA <sp|Q80VW7|AKNA_MOUSE>	0	0	0	0	0	0	0	0.984271	0	0	0	0	0 ± 0	0.164 ± 0.402	100	0.363217			-	-	-
Major facilitator superfamily domain-containing protein 10 <sp|Q9D2V8|MFS10_MOUSE>	0	0	0	0	0	0	0	0	0	0	0.9921	0	0 ± 0	0.165 ± 0.405	100	0.363217			-	-	-
Teneurin-3 <sp|Q9WTS6|TEN3_MOUSE>	0	0	0	0.996521	0	0	0	0.984271	0	0	0	0	0.166 ± 0.407	0.164 ± 0.402	-1.012	0.993194	303066	CHAIN 1-2715	-->camera-type eye morphogenesis -->homophilic cell adhesion via plasma membrane adhesion molecules -->positive regulation of neuron projection development -->self proteolysis -->signal transduction	-->axon -->integral component of plasma membrane -->membrane	-->protein heterodimerization activity -->protein homodimerization activity
Serine/threonine-protein kinase WNK3 <sp|Q80XP9|WNK3_MOUSE>	0	0	0	0	0	0	0.978506	0	0	0	0	0	0 ± 0	0.163 ± 0.399	100	0.363217			-	-	-
Methyl-CpG-binding domain protein 4 <sp|Q9Z2D7|MBD4_MOUSE>	0	0	0	0.996521	0	0	0	0	0	0.97023	0	0	0.166 ± 0.407	0.162 ± 0.396	-1.025	0.98529			-	-	-
Semaphorin-4G <sp|Q9WUH7|SEM4G_MOUSE>	0	0	0	0.996521	0	0	0	0.984271	0	0	0	0	0.166 ± 0.407	0.164 ± 0.402	-1.012	0.993194	92378	CHAIN 1-837	-->negative chemotaxis -->negative regulation of axon extension involved in axon guidance -->neural crest cell migration -->positive regulation of cell migration -->semaphorin-plexin signaling pathway	-->extracellular space -->integral component of membrane -->plasma membrane	-->chemorepellent activity -->semaphorin receptor binding
Zinc finger CCHC domain-containing protein 3 <sp|Q8BPK2|ZCHC3_MOUSE>	0	0	0	0	0	0	0	0	0	0	0.9921	0	0 ± 0	0.165 ± 0.405	100	0.363217			-	-	-
Protein transport protein Sec16A <sp|E9QAT4|SC16A_MOUSE>	0	0	0	0	0	0	0	0	0	0	0	0.941311	0 ± 0	0.157 ± 0.384	100	0.363217	254202	CHAIN 1-2357	-->COPII vesicle coating -->endoplasmic reticulum organization	-->cytoplasm -->cytosol -->Golgi apparatus -->Golgi membrane	-
Ephrin type-A receptor 6 <sp|Q62413|EPHA6_MOUSE>	0	0	0	0	0	0	0	0	0	0	0	0.941311	0 ± 0	0.157 ± 0.384	100	0.363217			-	-	-
Interleukin-36 receptor antagonist protein <sp|Q9QYY1|I36RA_MOUSE>	0	0	0	0	0	0	0	0	0	0.97023	0	0	0 ± 0	0.162 ± 0.396	100	0.363217			-	-	-
Histone-lysine N-methyltransferase NSD2 <sp|Q8BVE8|NSD2_MOUSE>	0	0	0	0	0	0	0	0	0	0.97023	0	0	0 ± 0	0.162 ± 0.396	100	0.363217	152253	CHAIN 1-1365	-->atrial septum primum morphogenesis -->atrial septum secundum morphogenesis -->bone development -->chromatin modification -->histone H3-K36 methylation -->histone H4-K20 methylation -->membranous septum morphogenesis -->negative regulation of transcription from RNA polymerase II promoter -->positive regulation of isotype switching to IgA isotypes -->regulation of double-strand break repair via …	-->chromosome -->nucleoplasm -->nucleus	-->chromatin binding -->histone-lysine N-methyltransferase activity -->sequence-specific DNA binding -->zinc ion binding
Myosin-7B <sp|A2AQP0|MYH7B_MOUSE>	0	0	0	0	0	0	0	0.984271	0	0	0	0.941311	0 ± 0	0.321 ± 0.497	100	0.174821	221497	CHAIN 1-1941	-	-->membrane -->myosin filament	-->ATP binding -->motor activity
MICAL-like protein 1 <sp|Q8BGT6|MILK1_MOUSE>	1.01558	0	0	0.996521	0.968045	0	0	0	0	0	0	0	0.497 ± 0.544	0 ± 0	-100	0.0756689			-	-	-
ATP-dependent RNA helicase DQX1 <sp|Q924H9|DQX1_MOUSE>	0	0	0	0	0	0	0	0	0	0	0	0.941311	0 ± 0	0.157 ± 0.384	100	0.363217			-	-	-
Glutamate receptor ionotropic, kainate 1 <sp|Q60934|GRIK1_MOUSE>	1.01558	0	0	0	0	0	0	0	0	0	0	0	0.169 ± 0.415	0 ± 0	-100	0.363217			-	-	-
Serine/arginine repetitive matrix protein 4 <sp|Q8BKA3|SRRM4_MOUSE>	0	0	0	0	0	0	0	0	0	0	0	0.941311	0 ± 0	0.157 ± 0.384	100	0.363217			-	-	-
Plexin-A3 <sp|P70208|PLXA3_MOUSE>	0	0	0	0	0	0	0	0	0	0.97023	0	0	0 ± 0	0.162 ± 0.396	100	0.363217			-	-	-
Kinase non-catalytic C-lobe domain-containing protein 1 <sp|Q0KK55|KNDC1_MOUSE>	0	0	0	0	0	0	0	0	0.987035	0	0	0	0 ± 0	0.165 ± 0.403	100	0.363217			-	-	-
Microtubule-associated tumor suppressor 1 homolog <sp|Q5HZI1|MTUS1_MOUSE>	0	0.981065	0	0	0	0	0	0	0.987035	0	0.9921	0	0.164 ± 0.401	0.33 ± 0.511	2.012	0.545135			-	-	-
Maestro heat-like repeat-containing protein family member 2B <sp|Q7M6Y6|MRO2B_MOUSE>	0	0	0	0	0	0	0	0	0	0	0.9921	0	0 ± 0	0.165 ± 0.405	100	0.363217			-	-	-
Toll-like receptor 9 <sp|Q9EQU3|TLR9_MOUSE>	0	0	0	0	0	0	0	0	0	0.97023	0	0	0 ± 0	0.162 ± 0.396	100	0.363217	116412	CHAIN 1-1032	-->cellular response to chloroquine -->defense response to Gram-negative bacterium -->defense response to virus -->I-kappaB phosphorylation -->immune response -->inflammatory response -->innate immune response -->maintenance of gastrointestinal epithelium -->MyD88-dependent toll-like receptor signaling pathway -->negative regulation of calcium-transporting ATPase activity -->negative regulation o…	-->apical plasma membrane -->basolateral plasma membrane -->cytoplasm -->early phagosome -->endoplasmic reticulum -->endoplasmic reticulum membrane -->endosome -->integral component of membrane -->lysosome -->plasma membrane	-->interleukin-1 receptor binding -->siRNA binding -->transmembrane signaling receptor activity
tRNA pseudouridine synthase Pus10 <sp|Q9D3U0|PUS10_MOUSE>	1.01558	0	0	0	0	0	0	0	0	0	0	0	0.169 ± 0.415	0 ± 0	-100	0.363217			-	-	-
Solute carrier family 35 member F1 <sp|Q8BGK5|S35F1_MOUSE>	0	0	0	0	0	0	0	0	0.987035	0	0	0	0 ± 0	0.165 ± 0.403	100	0.363217			-	-	-
Alpha-protein kinase 3 <sp|Q924C5|ALPK3_MOUSE>	0	0	0	0	0	0	0.978506	0	0	0	0	0	0 ± 0	0.163 ± 0.399	100	0.363217			-	-	-
Chromodomain-helicase-DNA-binding protein 1 <sp|P40201|CHD1_MOUSE>	0	0	0	0	0	0	0.978506	0	0	0	0	0	0 ± 0	0.163 ± 0.399	100	0.363217	196385	CHAIN 1-1711	-->chromatin assembly or disassembly -->chromatin remodeling -->regulation of transcription, DNA-templated -->transcription, DNA-templated	-->cytoplasm -->nucleus	-->ATP binding -->chromatin binding -->DNA binding -->helicase activity -->methylated histone binding
Aldehyde oxidase 3 <sp|G3X982|AOXC_MOUSE>	0	0	0	0	0	0	0.978506	0	0	0	0	0	0 ± 0	0.163 ± 0.399	100	0.363217	146902	CHAIN 1-1335	-	-->cytoplasm	-->2 iron, 2 sulfur cluster binding -->aldehyde oxidase activity -->electron carrier activity -->flavin adenine dinucleotide binding -->iron ion binding -->molybdenum ion binding -->NAD binding -->UDP-N-acetylmuramate dehydrogenase activity
NADH dehydrogenase [ubiquinone] 1 alpha subcomplex subunit 10, mitochondrial <sp|Q99LC3|NDUAA_MOUSE>	0	0	0	0	0	0	0	0	0	0.97023	0	0	0 ± 0	0.162 ± 0.396	100	0.363217	40603.4	CHAIN 1-355	-->oxidation-reduction process -->response to drug	-->mitochondrial respiratory chain complex I -->mitochondrion	-->ATP binding -->nucleoside kinase activity
Uncharacterized protein C20orf194 homolog <sp|Q7TT23|CT194_MOUSE>	0	0	0	0	0	0	0.978506	0	0	0	0	0	0 ± 0	0.163 ± 0.399	100	0.363217			-	-	-
Phosducin <sp|Q9QW08|PHOS_MOUSE>	0	0	0	0	0	0	0	0.984271	0	0	0	0	0 ± 0	0.164 ± 0.402	100	0.363217			-	-	-
PR domain-containing protein 11 <sp|A2AGX3|PRD11_MOUSE>	0	0	0	0	0	0	0	0	0	0	0.9921	0	0 ± 0	0.165 ± 0.405	100	0.363217			-	-	-
Interleukin-6 receptor subunit beta <sp|Q00560|IL6RB_MOUSE>	0	0	0	0	0	0	0	0.984271	0	0	0	0	0 ± 0	0.164 ± 0.402	100	0.363217			-	-	-
Protein argonaute-3 <sp|Q8CJF9|AGO3_MOUSE>	0	0	0	0	0	0	0.978506	0	0	0	0	0	0 ± 0	0.163 ± 0.399	100	0.363217			-	-	-
Collagen alpha-1(VIII) chain <sp|Q00780|CO8A1_MOUSE>	0	0	0	0	0	0	0	0	0	0.97023	0	0	0 ± 0	0.162 ± 0.396	100	0.363217			-	-	-
Histone-lysine N-methyltransferase 2C <sp|Q8BRH4|KMT2C_MOUSE>	0	0	0	0	0	0	0	0	0.987035	0	0	0	0 ± 0	0.165 ± 0.403	100	0.363217	540187	CHAIN 1-4903	-->eyelid development in camera-type eye -->histone H3-K4 methylation -->histone methylation -->intracellular signal transduction -->multicellular organism growth -->positive regulation of fibroblast proliferation -->regulation of gene expression -->regulation of transcription, DNA-templated -->single fertilization -->transcription, DNA-templated	-->histone methyltransferase complex -->nucleus	-->DNA binding -->histone methyltransferase activity (H3-K4 specific) -->poly(A) RNA binding -->zinc ion binding
Transcription factor NF-E2 45 kDa subunit <sp|Q07279|NFE2_MOUSE>	0	0	0	0	0	0	0.978506	0	0	0	0	0	0 ± 0	0.163 ± 0.399	100	0.363217			-	-	-
Zinc finger homeobox protein 4 <sp|Q9JJN2|ZFHX4_MOUSE>	0	0	0	0	0	0	0	1.96854	0	0	0	0	0 ± 0	0.328 ± 0.804	100	0.363217	392323	CHAIN 1-3550	-->regulation of transcription, DNA-templated -->transcription, DNA-templated	-->nucleus	-->sequence-specific DNA binding -->zinc ion binding
M-phase phosphoprotein 8 <sp|Q3TYA6|MPP8_MOUSE>	0	0	0	0	0	0	0	0	0	0	0	0.941311	0 ± 0	0.157 ± 0.384	100	0.363217			-	-	-
DIS3-like exonuclease 1 <sp|Q8C0S1|DI3L1_MOUSE>	0	0	0	0	0	0	0	0.984271	0	0	0	0	0 ± 0	0.164 ± 0.402	100	0.363217	120284	CHAIN 1-1053	-->mRNA catabolic process -->RNA phosphodiester bond hydrolysis, exonucleolytic -->rRNA catabolic process -->rRNA processing	-->centrosome -->cytoplasm -->cytoplasmic exosome (RNase complex) -->nuclear exosome (RNase complex) -->plasma membrane	-->3'-5'-exoribonuclease activity -->enzyme binding -->RNA binding
Protein cramped-like <sp|Q6PG95|CRML_MOUSE>	0	0	0	0	0	0	0	0.984271	0	0	0	0	0 ± 0	0.164 ± 0.402	100	0.363217	137121	CHAIN 1-1285	-	-->nucleus	-->chromatin binding -->DNA binding
Eosinophil peroxidase <sp|P49290|PERE_MOUSE>	0	0	0	0	0	0	0	0	0	0	0.9921	0	0 ± 0	0.165 ± 0.405	100	0.363217			-	-	-
Receptor-type tyrosine-protein phosphatase delta <sp|Q64487|PTPRD_MOUSE>	0	0.981065	0	0	0	0	0	0	0.987035	0	0	0	0.164 ± 0.401	0.165 ± 0.403	1.006	0.996661	214410	CHAIN 1-1912	-->heterophilic cell-cell adhesion via plasma membrane cell adhesion molecules -->negative regulation of JAK-STAT cascade -->neuron differentiation -->positive regulation of dendrite morphogenesis -->presynaptic membrane assembly -->regulation of immune response	-->integral component of membrane	-->cell adhesion molecule binding -->protein tyrosine phosphatase activity -->receptor binding
SRSF protein kinase 1 <sp|O70551|SRPK1_MOUSE>	0	0	0	0	0	0	0	0	0	0	0	0.941311	0 ± 0	0.157 ± 0.384	100	0.363217	73088.5	CHAIN 1-648	-->cell differentiation -->chromosome segregation -->intracellular signal transduction -->mRNA processing -->negative regulation of viral genome replication -->positive regulation of viral genome replication -->protein phosphorylation -->regulation of mRNA processing -->RNA splicing	-->cytoplasm -->endoplasmic reticulum -->nuclear matrix -->nucleoplasm -->nucleus -->plasma membrane	-->ATP binding -->magnesium ion binding -->poly(A) RNA binding -->protein serine/threonine kinase activity
Checkpoint protein HUS1 <sp|Q8BQY8|HUS1_MOUSE>	0	0	0	0	0	0	0	0.984271	0	0	0	0	0 ± 0	0.164 ± 0.402	100	0.363217			-	-	-
CLIP-associating protein 2 <sp|Q8BRT1|CLAP2_MOUSE>	0	0.981065	0	0	0	0	0	0	0	0	0	0	0.164 ± 0.401	0 ± 0	-100	0.363217			-	-	-
Pre-mRNA-splicing factor CWC25 homolog <sp|Q9DBF7|CWC25_MOUSE>	0	0	0	0	0	0	0	0.984271	0	0	0	0	0 ± 0	0.164 ± 0.402	100	0.363217			-	-	-
Ankyrin repeat and death domain-containing protein 1B <sp|Q14DN9|AKD1B_MOUSE>	0	0	0	0	0	0	0	0	0	0.97023	0	0	0 ± 0	0.162 ± 0.396	100	0.363217			-	-	-
Sperm flagellar protein 2 <sp|Q8C9J3|SPEF2_MOUSE>	1.01558	0	0	0	0	0	0.978506	0	0	0	0	0	0.169 ± 0.415	0.163 ± 0.399	-1.037	0.979543	199145	CHAIN 1-1734	-->axoneme assembly -->brain morphogenesis -->cilium morphogenesis -->embryonic neurocranium morphogenesis -->fertilization -->immune system development -->multicellular organism aging -->respiratory system development -->skeletal system morphogenesis -->spermatogenesis	-->cytoplasm -->Golgi apparatus -->manchette -->sperm midpiece	-
Zinc finger protein 521 <sp|Q6KAS7|ZN521_MOUSE>	0	0	0	0	0	0	0	0	0.987035	0	0	0	0 ± 0	0.165 ± 0.403	100	0.363217	147666	CHAIN 1-1311	-->neuron fate commitment -->regulation of transcription, DNA-templated -->transcription, DNA-templated	-->nucleus	-->DNA binding -->metal ion binding -->protein domain specific binding
Acetyl-CoA carboxylase 2 <sp|E9Q4Z2|ACACB_MOUSE>	0	0	0	0	0	0	0	0	0.987035	0	0	0	0 ± 0	0.165 ± 0.403	100	0.363217	275750	CHAIN 1-2448	-->acetyl-CoA metabolic process -->fatty acid biosynthetic process -->malonyl-CoA biosynthetic process -->negative regulation of fatty acid oxidation -->positive regulation of heart growth -->positive regulation of lipid storage -->protein homotetramerization -->response to drug -->response to organic cyclic compound	-->endomembrane system -->membrane -->mitochondrion -->nucleus	-->acetyl-CoA carboxylase activity -->ATP binding -->biotin binding -->biotin carboxylase activity -->metal ion binding
Cubilin <sp|Q9JLB4|CUBN_MOUSE>	0	0	0	0	0	0	0	0.984271	0	0	0	0	0 ± 0	0.164 ± 0.402	100	0.363217			-	-	-
Syntaxin-18 <sp|Q8VDS8|STX18_MOUSE>	0	0	0	0	0	0	0	0	0.987035	0	0	0	0 ± 0	0.165 ± 0.403	100	0.363217			-	-	-
Zinc finger protein 804A <sp|A2AKY4|Z804A_MOUSE>	0	0	0	0	0	0	0	0.984271	0	0	0	0	0 ± 0	0.164 ± 0.402	100	0.363217			-	-	-
Protein unc-13 homolog C <sp|Q8K0T7|UN13C_MOUSE>	0	0	0	0	0	0	0	0	0	0.97023	0	0	0 ± 0	0.162 ± 0.396	100	0.363217	249844	CHAIN 1-2210	-->exocytosis -->intracellular signal transduction -->synaptic transmission	-->cell junction -->cytoplasm -->plasma membrane -->presynaptic membrane	-->diacylglycerol binding -->metal ion binding -->non-kinase phorbol ester receptor activity
Protein bassoon <sp|O88737|BSN_MOUSE>	0	0	0	0	0	0	0	0	0	0.97023	0	0	0 ± 0	0.162 ± 0.396	100	0.363217	418843	CHAIN 1-3942	-	-->axon -->cell junction -->cell surface -->cytoplasm -->cytoskeleton -->dendrite -->excitatory synapse -->extrinsic component of membrane -->neuronal postsynaptic density -->neuron projection terminus -->postsynaptic density -->presynaptic active zone -->synapse	-->metal ion binding
Protein MON2 homolog <sp|Q80TL7|MON2_MOUSE>	1.01558	0	0	0	0	0	0	0	0	0	0.9921	0	0.169 ± 0.415	0.165 ± 0.405	-1.024	0.987128	189078	CHAIN 1-1715	-->Golgi to endosome transport -->protein transport	-->cytosol -->extracellular exosome	-
Palmitoyltransferase ZDHHC23 <sp|Q5Y5T3|ZDH23_MOUSE>	0	0	0	0	0	0	0	0.984271	0	0	0	0	0 ± 0	0.164 ± 0.402	100	0.363217			-	-	-
Uncharacterized protein KIAA1755 homolog <sp|Q8BWG4|K1755_MOUSE>	0	0	0	0	0	0	0	0	0.987035	0.97023	0	0	0 ± 0	0.326 ± 0.505	100	0.174707			-	-	-
Inward rectifier potassium channel 4 <sp|P52189|KCNJ4_MOUSE>	0	0	0	0	0	0	0.978506	0	0	0	0	0	0 ± 0	0.163 ± 0.399	100	0.363217			-	-	-
KN motif and ankyrin repeat domain-containing protein 2 <sp|Q8BX02|KANK2_MOUSE>	0	0	0	0	0	0	0	0	0.987035	0	0	0	0 ± 0	0.165 ± 0.403	100	0.363217	90245.4	CHAIN 1-843	-->apoptotic process -->negative regulation of cell proliferation -->negative regulation of G1/S transition of mitotic cell cycle -->negative regulation of intracellular estrogen receptor signaling pathway -->negative regulation of programmed cell death -->negative regulation of stress fiber assembly -->negative regulation of transcription from RNA polymerase II promoter -->negative regulation of…	-->cytoplasm -->mitochondrion	-
Peptidyl-prolyl cis-trans isomerase FKBP5 <sp|Q64378|FKBP5_MOUSE>	0	0	0	0	0	0.983527	0	0	0	0	0	0	0.164 ± 0.402	0 ± 0	-100	0.363217	50966.1	CHAIN 1-456	-->chaperone-mediated protein folding	-->Extracellular region or secreted Cytosol Plasma membrane Cytoskeleton Lysosome Endosome Peroxisome ER Golgi apparatus Nucleus Mitochondrion Manual annotation Automatic computational assertionGraphics by Christian Stolte; -->nucleoplasm -->cytoplasm	-->FK506 binding -->heat shock protein binding -->peptidyl-prolyl cis-trans isomerase activity
Discoidin, CUB and LCCL domain-containing protein 1 <sp|Q9D4J3|DCBD1_MOUSE>	0	0	0	0	0	0	0	0	0	0.97023	0	0	0 ± 0	0.162 ± 0.396	100	0.363217			-	-	-
Collagen alpha-1(XII) chain <sp|Q60847|COCA1_MOUSE>	0	1.96213	0	0	0	0	0.978506	0	0	0	0	0	0.327 ± 0.801	0.163 ± 0.399	-2.006	0.666652	340214	CHAIN 1-3120	-->cell adhesion -->endodermal cell differentiation	-->collagen trimer -->extracellular exosome -->extracellular matrix -->extracellular space -->extracellular vesicle -->proteinaceous extracellular matrix	-
WD repeat and FYVE domain-containing protein 3 <sp|Q6VNB8|WDFY3_MOUSE>	0	0	0	0	0.968045	0	0	0	0	0	0	0	0.161 ± 0.395	0 ± 0	-100	0.363217	392338	CHAIN 1-3508	-->aggrephagy -->positive regulation of macroautophagy	-->Atg12-Atg5-Atg16 complex -->autophagosome -->cytoplasm -->endomembrane system -->extrinsic component of autophagosome membrane -->extrinsic component of membrane -->inclusion body -->nuclear envelope -->nuclear membrane -->PML body	-->1-phosphatidylinositol binding -->beta-N-acetylglucosaminylglycopeptide beta-1,4-galactosyltransferase activity -->metal ion binding -->phospholipid binding
Endothelin receptor type B <sp|P48302|EDNRB_MOUSE>	0	0	0	0	0	0	0	0	0	0	0.9921	0	0 ± 0	0.165 ± 0.405	100	0.363217			-	-	-
CCN family member 3 <sp|Q64299|CCN3_MOUSE>	0	0	0	0	0	0	0	0	0	0	0	0.941311	0 ± 0	0.157 ± 0.384	100	0.363217	38927.9	CHAIN 1-354	-->angiogenesis -->bone regeneration -->cell adhesion -->cell adhesion mediated by integrin -->cell chemotaxis -->chondrocyte differentiation -->endothelial cell-cell adhesion -->endothelial cell chemotaxis -->fibroblast migration -->hematopoietic stem cell homeostasis -->negative regulation of cell death -->negative regulation of cell growth -->negative regulation of chondrocyte proliferation --…	-->axon -->cytoplasm -->dendrite -->extracellular region -->gap junction -->intracellular membrane-bounded organelle -->neuronal cell body -->proteinaceous extracellular matrix	-->heparin binding -->integrin binding -->Notch binding
Ubiquitin carboxyl-terminal hydrolase 45 <sp|Q8K387|UBP45_MOUSE>	0	0	0	0	0	0	0	0	0	0	0	0.941311	0 ± 0	0.157 ± 0.384	100	0.363217			-	-	-
Actin-related protein 5 <sp|Q80US4|ARP5_MOUSE>	0	0	0	0	0	0	0.978506	0	0	0	0	0	0 ± 0	0.163 ± 0.399	100	0.363217			-	-	-
Rho-associated protein kinase 2 <sp|P70336|ROCK2_MOUSE>	0	0	0	0	0	0	0	0	0.987035	0	0	0	0 ± 0	0.165 ± 0.403	100	0.363217	160586	CHAIN 1-1388	-->actin cytoskeleton organization -->cellular response to testosterone stimulus -->centrosome duplication -->cortical actin cytoskeleton organization -->dendrite morphogenesis -->establishment of protein localization to plasma membrane -->extrinsic apoptotic signaling pathway via death domain receptors -->I-kappaB kinase/NF-kappaB signaling -->negative regulation of angiogenesis -->negative regu…	-->centrosome -->cytoplasmic ribonucleoprotein granule -->nucleus -->plasma membrane -->spindle pole centrosome	-->ATP binding -->metal ion binding -->poly(A) RNA binding -->protein kinase activity -->protein serine/threonine kinase activity -->Rho-dependent protein serine/threonine kinase activity
Neuronal pentraxin-1 <sp|Q62443|NPTX1_MOUSE>	0	0	0	0	0	0	0	0	0	0.97023	0	0	0 ± 0	0.162 ± 0.396	100	0.363217			-	-	-
TBC1 domain family member 24 <sp|Q3UUG6|TBC24_MOUSE>	0	0	0	0	0	0	0	0.984271	0	0	0	0	0 ± 0	0.164 ± 0.402	100	0.363217	63235.7	CHAIN 1-561	-->negative regulation of oxidative stress-induced neuron death -->negative regulation of peptidyl-cysteine S-nitrosylation -->neuron projection development	-->Extracellular region or secreted Cytosol Plasma membrane Cytoskeleton Lysosome Endosome Peroxisome ER Golgi apparatus Nucleus Mitochondrion Manual annotation Automatic computational assertionGraphics by Christian Stolte; -->plasma membrane -->cell junction -->cytoplasm -->neuromuscular junction -->terminal bouton	-->GTPase activator activity
Rho guanine nucleotide exchange factor 10 <sp|Q8C033|ARHGA_MOUSE>	0	0	0	0	0	0	0	0	0.987035	0	0	0	0 ± 0	0.165 ± 0.403	100	0.363217			-	-	-
Spectrin alpha chain, non-erythrocytic 1 <sp|P16546|SPTN1_MOUSE>	0	0	0	0	0	0	0	0	0	0	0	0.941311	0 ± 0	0.157 ± 0.384	100	0.363217	284597	CHAIN 1-2472	-->actin filament capping	-->cortical cytoskeleton -->cuticular plate -->fascia adherens -->lateral plasma membrane -->membrane -->paranode region of axon -->Z disc	-->calcium ion binding -->protein heterodimerization activity -->spectrin binding
Inhibitor of nuclear factor kappa-B kinase subunit epsilon <sp|Q9R0T8|IKKE_MOUSE>	0	0	0	0	0	0	0	0	0	0	0	0.941311	0 ± 0	0.157 ± 0.384	100	0.363217			-	-	-
G protein-activated inward rectifier potassium channel 3 <sp|P48543|KCNJ9_MOUSE>	0	0	0	0	0	0	0	0	0	0	0	0.941311	0 ± 0	0.157 ± 0.384	100	0.363217			-	-	-
Protein O-mannosyl-transferase 2 <sp|Q8BGQ4|POMT2_MOUSE>	0	0	0	0	0	0	0	0	0.987035	0	0	0	0 ± 0	0.165 ± 0.403	100	0.363217			-	-	-
Zinc finger and SCAN domain-containing protein 26 <sp|Q5RJ54|ZSC26_MOUSE>	0	0	0	0	0	0	0	0	0	0.97023	0	0	0 ± 0	0.162 ± 0.396	100	0.363217			-	-	-
Plexin-A1 <sp|P70206|PLXA1_MOUSE>	0	0	0	0	0	0	0	0	0	0	0.9921	0	0 ± 0	0.165 ± 0.405	100	0.363217			-	-	-
Cleavage and polyadenylation specificity factor subunit 1 <sp|Q9EPU4|CPSF1_MOUSE>	0	0	0	0	0	0	0	0	0	0.97023	0	0	0 ± 0	0.162 ± 0.396	100	0.363217	160818	CHAIN 1-1441	-->mRNA cleavage -->mRNA polyadenylation	-->mRNA cleavage and polyadenylation specificity factor complex -->nucleoplasm	-->enzyme binding -->mRNA 3'-UTR AU-rich region binding -->mRNA binding
Mitogen-activated protein kinase 6 <sp|Q61532|MK06_MOUSE>	0	0	0	0	0	0	0.978506	0	0	0	0	0	0 ± 0	0.163 ± 0.399	100	0.363217			-	-	-
ATP-binding cassette sub-family A member 7 <sp|Q91V24|ABCA7_MOUSE>	0	0.981065	0	0	0	0	0	0.984271	0	0	0	0	0.164 ± 0.401	0.164 ± 0.402	-1	0.998205	236884	CHAIN 1-2159	-->apolipoprotein A-I-mediated signaling pathway -->cholesterol efflux -->high-density lipoprotein particle assembly -->memory -->negative regulation of amyloid precursor protein biosynthetic process -->negative regulation of ATPase activity -->negative regulation of beta-amyloid formation -->peptide cross-linking -->phagocytosis -->phospholipid efflux -->phospholipid scrambling -->positive regul…	-->apical plasma membrane -->cell junction -->cell surface -->early endosome membrane -->Golgi apparatus -->Golgi membrane -->integral component of membrane -->intracellular -->intracellular membrane-bounded organelle -->phagocytic cup -->plasma membrane -->ruffle membrane	-->apolipoprotein A-I receptor activity -->ATPase activity, coupled to transmembrane movement of substances -->ATP binding -->phospholipid transporter activity
Protocadherin Fat 4 <sp|Q2PZL6|FAT4_MOUSE>	0	0	1.02276	0	0	0	0	0	0.987035	0	0	0	0.17 ± 0.418	0.165 ± 0.403	-1.03	0.980442	540316	CHAIN 1-4981	-->branching involved in ureteric bud morphogenesis -->cerebral cortex development -->digestive tract development -->establishment of planar polarity -->heart morphogenesis -->heterophilic cell-cell adhesion via plasma membrane cell adhesion molecules -->hippo signaling -->homophilic cell adhesion via plasma membrane adhesion molecules -->inner ear receptor stereocilium organization -->kidney dev…	-->apical part of cell -->extracellular exosome -->integral component of membrane -->plasma membrane	-->calcium ion binding
Asporin <sp|Q99MQ4|ASPN_MOUSE>	0	0	0	0	0	0	0	0	0.987035	0	0	0	0 ± 0	0.165 ± 0.403	100	0.363217	42572.5	CHAIN 1-373	-->bone mineralization -->cytokine-mediated signaling pathway -->negative regulation of JAK-STAT cascade -->negative regulation of protein kinase activity -->negative regulation of tooth mineralization -->negative regulation of transforming growth factor beta receptor signaling pathway	-->cytoplasm -->proteinaceous extracellular matrix	-->calcium ion binding -->protein kinase inhibitor activity
Membrane progesterone receptor epsilon <sp|Q6TCG2|PAQR9_MOUSE>	0	0	0	0	0	0	0	0	0	0.97023	0	0	0 ± 0	0.162 ± 0.396	100	0.363217	42741.2	CHAIN 1-375	-->response to steroid hormone	-->Extracellular region or secreted Cytosol Plasma membrane Cytoskeleton Lysosome Endosome Peroxisome ER Golgi apparatus Nucleus Mitochondrion Manual annotation Automatic computational assertionGraphics by Christian Stolte; -->plasma membrane -->integral component of membrane	-->steroid binding -->steroid hormone receptor activity
DENN domain-containing protein 5B <sp|A2RSQ0|DEN5B_MOUSE>	0	0	0	0.996521	0	0	0	0	0	0	0	0	0.166 ± 0.407	0 ± 0	-100	0.363217			-	-	-
Cofilin-1 <sp|P18760|COF1_MOUSE>	0	0	0	0	0	0.983527	0	0	0	0	0	0	0.164 ± 0.402	0 ± 0	-100	0.363217	18559.5	CHAIN 1-166	-->actin filament depolymerization -->actin filament organization -->cell projection organization -->cellular component movement -->cytoskeleton organization -->establishment of cell polarity -->mitotic cytokinesis -->negative regulation of cell size -->neural crest cell migration -->neural fold formation -->positive regulation of actin filament depolymerization -->protein import into nucleus -->…	-->cell-cell junction -->cortical actin cytoskeleton -->cytoplasm -->cytosol -->extracellular region -->extracellular space -->extracellular vesicular exosome -->lamellipodium -->nucleus -->plasma membrane	-
Guanylate cyclase soluble subunit alpha-1 <sp|Q9ERL9|GCYA1_MOUSE>	0	0	0	0	0	0	0	0	0.987035	0	0	0	0 ± 0	0.165 ± 0.403	100	0.363217			-	-	-
Cilia- and flagella-associated protein 57 <sp|Q9D180|CFA57_MOUSE>	0	0	0	0	0	0	0	0	0	0.97023	0	0	0 ± 0	0.162 ± 0.396	100	0.363217			-	-	-
Telomerase-binding protein EST1A <sp|P61406|EST1A_MOUSE>	0	0	0	0	0	0	0	0	0	0.97023	0	0	0 ± 0	0.162 ± 0.396	100	0.363217	160496	CHAIN 1-1418	-->nuclear-transcribed mRNA catabolic process, nonsense-mediated decay -->RNA phosphodiester bond hydrolysis, endonucleolytic -->telomere maintenance	-->chromosome, telomeric region -->cytoplasm -->cytosol -->exon-exon junction complex -->nucleolus -->nucleus	-->endoribonuclease activity -->metal ion binding -->telomeric DNA binding
Citramalyl-CoA lyase, mitochondrial <sp|Q8R4N0|CLYBL_MOUSE>	0	0	0	0	0	0	0	0	0.987035	0	0	0	0 ± 0	0.165 ± 0.403	100	0.363217	37548.5	CHAIN 1-338	-	-->mitochondrion	-->magnesium ion binding -->malate synthase activity
Rap guanine nucleotide exchange factor 2 <sp|Q8CHG7|RPGF2_MOUSE>	0	0	0	0	0	0	0	0	0	0	0.9921	0	0 ± 0	0.165 ± 0.405	100	0.363217	166415	CHAIN 1-1496	-->adenylate cyclase-activating adrenergic receptor signaling pathway -->blood vessel development -->brain-derived neurotrophic factor receptor signaling pathway -->cAMP-mediated signaling -->cellular response to cAMP -->cellular response to cGMP -->cellular response to nerve growth factor stimulus -->establishment of endothelial barrier -->establishment of endothelial intestinal barrier -->foreb…	-->apical plasma membrane -->bicellular tight junction -->cell-cell junction -->cytoplasm -->cytosol -->endocytic vesicle -->late endosome -->membrane -->neuronal cell body -->neuron projection -->perinuclear region of cytoplasm -->plasma membrane -->protein complex -->synapse	-->beta-1 adrenergic receptor binding -->cAMP binding -->GTPase activator activity -->PDZ domain binding -->phosphatidic acid binding -->Rap guanyl-nucleotide exchange factor activity -->Ras guanyl-nucleotide exchange factor activity -->WW domain binding
Testis-expressed protein 15 <sp|F8VPN2|TEX15_MOUSE>	0	0	0	0	0	0	0	0	0	0.97023	0	0	0 ± 0	0.162 ± 0.396	100	0.363217			-	-	-
DENN domain-containing protein 1B <sp|Q3U1T9|DEN1B_MOUSE>	0	0	0	0	0	0	0	0	0	0	0.9921	0	0 ± 0	0.165 ± 0.405	100	0.363217			-	-	-
Podocan-like protein 1 <sp|Q6P3Y9|PONL1_MOUSE>	0	0	0	0	0	0	0	0	0	0	0.9921	0	0 ± 0	0.165 ± 0.405	100	0.363217			-	-	-
DNA topoisomerase 3-alpha <sp|O70157|TOP3A_MOUSE>	0	0	0	0	0	0	0	0	0	0.97023	0	0	0 ± 0	0.162 ± 0.396	100	0.363217			-	-	-
Poly(A)-specific ribonuclease PARN <sp|Q8VDG3|PARN_MOUSE>	0	0	0	0	0	0	0	0	0	0	0.9921	0	0 ± 0	0.165 ± 0.405	100	0.363217			-	-	-
Metabotropic glutamate receptor 2 <sp|Q14BI2|GRM2_MOUSE>	0	0	0	0	0	0	0	0	0	0	0.9921	0	0 ± 0	0.165 ± 0.405	100	0.363217			-	-	-
Gasdermin-E <sp|Q9Z2D3|GSDME_MOUSE>	0	0	0	0	0	0	0	0	0	0	0.9921	0	0 ± 0	0.165 ± 0.405	100	0.363217			-	-	-
FH1/FH2 domain-containing protein 3 <sp|Q76LL6|FHOD3_MOUSE>	0	0	0	0	0	0	0.978506	0	0	0	0	0	0 ± 0	0.163 ± 0.399	100	0.363217			-	-	-
Coiled-coil domain-containing protein 39 <sp|Q9D5Y1|CCD39_MOUSE>	0	0	0	0	0	0	0	0	0.987035	0.97023	0	0.941311	0 ± 0	0.483 ± 0.529	100	0.0756679	110072	CHAIN 1-937	-->axonemal dynein complex assembly -->cilium-dependent cell motility -->cilium movement -->determination of digestive tract left/right asymmetry -->determination of left/right symmetry -->determination of liver left/right asymmetry -->determination of pancreatic left/right asymmetry -->epithelial cilium movement involved in determination of left/right asymmetry -->heart development -->heart loop…	-->axoneme -->cytoplasm	-
NACHT, LRR and PYD domains-containing protein 4C <sp|Q3TKR3|NAL4C_MOUSE>	0	0	0	0	0	0	0	0	0	0	0	0.941311	0 ± 0	0.157 ± 0.384	100	0.363217			-	-	-
Mastermind-like protein 1 <sp|Q6T264|MAML1_MOUSE>	0	0	0	0	0	0	0	0	0.987035	0	0	0	0 ± 0	0.165 ± 0.403	100	0.363217			-	-	-
Probable tRNA pseudouridine synthase 1 <sp|Q8C0D0|TRUB1_MOUSE>	0	0	0	0	0	0	0	0	0.987035	0	0	0	0 ± 0	0.165 ± 0.403	100	0.363217			-	-	-
DNA (cytosine-5)-methyltransferase 1 <sp|P13864|DNMT1_MOUSE>	0	0	0	0	0	0	0	0	0.987035	0	0	0	0 ± 0	0.165 ± 0.403	100	0.363217	183189	CHAIN 1-1620	-->aging -->brain development -->cellular response to amino acid stimulus -->cellular response to lead ion -->cellular response to nerve growth factor stimulus -->cellular response to platelet-derived growth factor stimulus -->cellular response to transforming growth factor beta stimulus -->chromatin modification -->chromatin silencing at rDNA -->DNA hypermethylation -->DNA methylation -->DNA met…	-->cytoplasm -->heterochromatin -->neuronal cell body -->nucleoplasm -->nucleus -->pericentric heterochromatin -->protein complex -->replication fork	-->chromatin binding -->DNA (cytosine-5-)-methyltransferase activity -->DNA (cytosine-5-)-methyltransferase activity, acting on CpG substrates -->DNA binding -->DNA-methyltransferase activity -->double-stranded DNA binding -->methyl-CpG binding -->methyltransferase activity -->promoter-specific chromatin binding -->RNA binding -->unmethylated CpG binding -->zinc ion binding
Aryl hydrocarbon receptor nuclear translocator-like protein 2 <sp|Q2VPD4|BMAL2_MOUSE>	0	0	0	0	0	0	0	0	0.987035	0	0	0	0 ± 0	0.165 ± 0.403	100	0.363217	64398.9	CHAIN 1-579	-->circadian rhythm -->positive regulation of circadian rhythm -->positive regulation of transcription, DNA-templated -->positive regulation of transcription from RNA polymerase II promoter -->regulation of transcription from RNA polymerase II promoter -->transcription, DNA-templated	-->cytoplasm -->nucleolus -->nucleus -->transcription factor complex	-->E-box binding -->transcription factor activity, RNA polymerase II core promoter proximal region sequence-specific binding -->transcription factor activity, sequence-specific DNA binding
Pre-mRNA-processing factor 6 <sp|Q91YR7|PRP6_MOUSE>	0	0	0	0	0	0	0	0	0	0.97023	0	0	0 ± 0	0.162 ± 0.396	100	0.363217	106722	CHAIN 1-941	-->positive regulation of transcription from RNA polymerase II promoter -->RNA localization -->spliceosomal tri-snRNP complex assembly	-->catalytic step 2 spliceosome -->membrane -->nuclear speck -->nucleoplasm -->nucleus -->U4/U6 x U5 tri-snRNP complex -->U5 snRNP	-->androgen receptor binding -->poly(A) RNA binding -->ribonucleoprotein complex binding -->RNA binding -->transcription coactivator activity
Spermatogenesis-associated protein 7 homolog <sp|Q80VP2|SPAT7_MOUSE>	0	0	0	0	0	0	0	0	0	0.97023	0	0	0 ± 0	0.162 ± 0.396	100	0.363217			-	-	-
Symplekin <sp|Q80X82|SYMPK_MOUSE>	0	0	0	0	0	0	0	0	0	0.97023	0	0	0 ± 0	0.162 ± 0.396	100	0.363217	142284	CHAIN 1-1284	-->cell adhesion -->mRNA polyadenylation -->positive regulation of protein dephosphorylation	-->cytoplasm -->cytoskeleton -->nucleoplasm -->plasma membrane -->tight junction	-
Peroxisomal membrane protein PMP34 <sp|O70579|PM34_MOUSE>	0	0	0	0	0	0	0.978506	0	0	0	0	0	0 ± 0	0.163 ± 0.399	100	0.363217			-	-	-
Polycystic kidney disease and receptor for egg jelly-related protein <sp|Q9Z0T6|PKDRE_MOUSE>	0	0	0	0	0	0	0.978506	0	0	0	0	0	0 ± 0	0.163 ± 0.399	100	0.363217			-	-	-
DmX-like protein 1 <sp|Q6PNC0|DMXL1_MOUSE>	0	0	0	0	0.968045	0	0	0	0	0	0	0.941311	0.161 ± 0.395	0.157 ± 0.384	-1.025	0.984593			-	-	-
Zinc finger MYM-type protein 2 <sp|Q9CU65|ZMYM2_MOUSE>	0	0	0	0	0	0	0	0.984271	0	0	0	0	0 ± 0	0.164 ± 0.402	100	0.363217			-	-	-
Membrane-associated guanylate kinase, WW and PDZ domain-containing protein 1 <sp|Q6RHR9|MAGI1_MOUSE>	0	0	1.02276	0	0	0	0	0	0	0	0	0	0.17 ± 0.418	0 ± 0	-100	0.363217			-	-	-
THO complex subunit 5 homolog <sp|Q8BKT7|THOC5_MOUSE>	0	0	0	0	0	0	0.978506	0	0	0	0	0	0 ± 0	0.163 ± 0.399	100	0.363217	78686	CHAIN 1-683	-->blastocyst development -->cell morphogenesis -->monocyte differentiation -->mRNA export from nucleus -->mRNA processing -->negative regulation of DNA damage checkpoint -->negative regulation of macrophage differentiation -->positive regulation of DNA-templated transcription, elongation -->primitive hemopoiesis -->regulation of gene expression -->regulation of mRNA export from nucleus -->regula…	-->cytoplasm -->nucleoplasm -->nucleus -->THO complex -->THO complex part of transcription export complex -->transcription export complex	-->mRNA binding
Neuromodulin <sp|P06837|NEUM_MOUSE>	0	0	0	0	0	0	0	0	0	0.97023	0	0	0 ± 0	0.162 ± 0.396	100	0.363217	23632.4	CHAIN 1-227	-->axon choice point recognition -->axon guidance -->cell fate commitment -->glial cell differentiation -->regulation of filopodium assembly -->regulation of growth -->tissue regeneration	-->axon -->cell junction -->cell periphery -->cytoplasm -->filopodium membrane -->growth cone membrane -->neuronal postsynaptic density -->plasma membrane -->postsynaptic density	-
Caspase-2 <sp|P29594|CASP2_MOUSE>	0	0	0	0	0	0	0	0	0.987035	0	0	0	0 ± 0	0.165 ± 0.403	100	0.363217	50660.9	CHAIN 1-452	-->aging -->apoptotic signaling pathway -->brain development -->cellular response to mechanical stimulus -->DNA damage response, signal transduction by p53 class mediator resulting in cell cycle arrest -->ectopic germ cell programmed cell death -->extrinsic apoptotic signaling pathway in absence of ligand -->luteolysis -->negative regulation of apoptotic process -->neural retina development -->po…	-->cytoplasm -->membrane -->mitochondrion -->nucleus	-->cysteine-type endopeptidase activity -->cysteine-type endopeptidase activity involved in apoptotic process -->protein domain specific binding
Cadherin EGF LAG seven-pass G-type receptor 1 <sp|O35161|CELR1_MOUSE>	0	0	0	0	0	0	0	0.984271	0	0	0.9921	0	0 ± 0	0.329 ± 0.51	100	0.174692	330471	CHAIN 1-3034	-->anterior/posterior pattern specification -->apical protein localization -->cell-cell signaling -->central nervous system development -->establishment of body hair planar orientation -->establishment of planar polarity -->establishment of planar polarity of embryonic epithelium -->gastrulation with mouth forming second -->G-protein coupled receptor signaling pathway -->hair follicle development…	-->integral component of plasma membrane -->membrane -->nucleoplasm -->plasma membrane	-->calcium ion binding -->G-protein coupled receptor activity -->protein dimerization activity -->transmembrane signaling receptor activity
Netrin receptor DCC <sp|P70211|DCC_MOUSE>	0	0	0	0	0	0	0.978506	0	0	0	0	0	0 ± 0	0.163 ± 0.399	100	0.363217			-	-	-
NAD(P) transhydrogenase, mitochondrial <sp|Q61941|NNTM_MOUSE>	0	0	0	0	0	0	0	0	0.987035	0	0	0	0 ± 0	0.165 ± 0.403	100	0.363217	113838	CHAIN 1-1086	-->cell redox homeostasis -->NADPH regeneration -->proton transport -->reactive oxygen species metabolic process	-->integral component of membrane -->mitochondrial inner membrane -->mitochondrion	-->NAD(P)+ transhydrogenase (AB-specific) activity -->NAD binding -->NADP binding
Serine/threonine-protein kinase ATR <sp|Q9JKK8|ATR_MOUSE>	0	0	0	0	0	0	0	0	0.987035	0	0	0	0 ± 0	0.165 ± 0.403	100	0.363217	300224	CHAIN 1-2635	-->cellular response to DNA damage stimulus -->cellular response to gamma radiation -->cellular response to UV -->DNA damage checkpoint -->DNA repair -->double-strand break repair via homologous recombination -->negative regulation of DNA replication -->peptidyl-serine phosphorylation -->positive regulation of DNA damage response, signal transduction by p53 class mediator -->protein autophosphory…	-->chromosome -->Golgi apparatus -->nucleoplasm -->nucleus -->PML body -->XY body	-->ATP binding -->DNA binding -->MutLalpha complex binding -->MutSalpha complex binding -->protein dimerization activity -->protein kinase activity -->protein serine/threonine kinase activity
Vacuolar protein sorting-associated protein 8 homolog <sp|Q0P5W1|VPS8_MOUSE>	0	0	0	0	0	0	0	0.984271	0	0	0	0	0 ± 0	0.164 ± 0.402	100	0.363217	161146	CHAIN 1-1427	-->endosomal vesicle fusion	-->CORVET complex -->early endosome	-->zinc ion binding
Sorting nexin-7 <sp|Q9CY18|SNX7_MOUSE>	0	0	0	0	0	0	0	0	0.987035	0	0	0	0 ± 0	0.165 ± 0.403	100	0.363217	45000.3	CHAIN 1-387	-->endocytosis -->protein transport -->vesicle organization	-->cytoplasmic vesicle membrane -->endosome -->extrinsic component of membrane	-->phosphatidylinositol binding
Kinectin <sp|Q61595|KTN1_MOUSE>	0	0.981065	0	0	0.968045	0	0.978506	0	0	0	0	0	0.325 ± 0.503	0.163 ± 0.399	-1.994	0.551919	152592	CHAIN 1-1327	-->microtubule-based movement	-->endoplasmic reticulum -->endoplasmic reticulum membrane -->integral component of membrane	-->kinesin binding
Paired amphipathic helix protein Sin3b <sp|Q62141|SIN3B_MOUSE>	0	0	0	0	0	0	0	0.984271	0	0	0	0	0 ± 0	0.164 ± 0.402	100	0.363217			-	-	-
Receptor-type tyrosine-protein phosphatase C <sp|P06800|PTPRC_MOUSE>	0	0	0	0	0	0	0	0	0	0	0	0.941311	0 ± 0	0.157 ± 0.384	100	0.363217	144604	CHAIN 1-1291	-->activation of MAPK activity -->B cell differentiation -->B cell proliferation -->B cell receptor signaling pathway -->bone marrow development -->cell cycle phase transition -->defense response to virus -->dephosphorylation -->hematopoietic progenitor cell differentiation -->heterotypic cell-cell adhesion -->immunoglobulin biosynthetic process -->leukocyte cell-cell adhesion -->negative regulat…	-->cell periphery -->external side of plasma membrane -->extracellular vesicular exosome -->focal adhesion -->integral component of plasma membrane -->membrane -->membrane raft -->plasma membrane	-->heparan sulfate proteoglycan binding -->heparin binding -->protein kinase binding -->protein tyrosine phosphatase activity
Cytochrome P450 2B9 <sp|P12790|CP2B9_MOUSE>	0	0	0	0	0	0	0	0	0	0	0	0.941311	0 ± 0	0.157 ± 0.384	100	0.363217	55740.9	CHAIN 1-491	-->epoxygenase P450 pathway -->response to stilbenoid	-->Extracellular region or secreted Cytosol Plasma membrane Cytoskeleton Lysosome Endosome Peroxisome ER Golgi apparatus Nucleus Mitochondrion Manual annotation Automatic computational assertionGraphics by Christian Stolte; -->endoplasmic reticulum membrane -->organelle membrane	-->arachidonic acid epoxygenase activity -->aromatase activity -->heme binding -->iron ion binding -->steroid hydroxylase activity
Ankyrin repeat and SOCS box protein 13 <sp|Q8VBX0|ASB13_MOUSE>	0	0.981065	0	0	0	0	0	0	0	0	0	0.941311	0.164 ± 0.401	0.157 ± 0.384	-1.045	0.97725			-	-	-
1-phosphatidylinositol 3-phosphate 5-kinase <sp|Q9Z1T6|FYV1_MOUSE>	0	0	0	0	0	0	0.978506	0	0	0	0	0	0 ± 0	0.163 ± 0.399	100	0.363217	236877	CHAIN 1-2097	-->intracellular signal transduction -->myelin assembly -->phosphatidylinositol phosphorylation -->protein localization to nucleus -->regulation of autophagosome assembly -->retrograde transport, endosome to Golgi	-->cell-cell junction -->cytoplasmic vesicle -->cytoplasmic vesicle membrane -->cytosol -->early endosome membrane -->endosome membrane -->Golgi membrane -->late endosome membrane -->membrane raft -->perinuclear region of cytoplasm -->vesicle membrane	-->1-phosphatidylinositol-3-phosphate 5-kinase activity -->1-phosphatidylinositol-4-phosphate 5-kinase activity -->1-phosphatidylinositol-5-kinase activity -->ATP binding -->zinc ion binding
Signal transducer and transcription activator 6 <sp|P52633|STAT6_MOUSE>	0	0	0	0	0	0	0	0	0.987035	0	0	0	0 ± 0	0.165 ± 0.403	100	0.363217	93497.2	CHAIN 1-837	-->cellular response to hydrogen peroxide -->cellular response to reactive nitrogen species -->interleukin-4-mediated signaling pathway -->mammary gland epithelial cell proliferation -->mammary gland morphogenesis -->negative regulation of transcription from RNA polymerase II promoter -->negative regulation of type 2 immune response -->positive regulation of isotype switching to IgE isotypes -->p…	-->cytoplasm -->membrane raft -->nuclear chromatin -->nucleoplasm -->nucleus	-->DNA binding -->identical protein binding -->protein phosphatase binding -->RNA polymerase II core promoter sequence-specific DNA binding -->sequence-specific DNA binding -->transcriptional activator activity, RNA polymerase II core promoter proximal region sequence-specific binding -->transcriptional repressor activity, RNA polymerase II core promoter proximal region sequence-specific binding
SH3-containing GRB2-like protein 3-interacting protein 1 <sp|Q8VD37|SGIP1_MOUSE>	0	0	0	0	0	0	0	0	0.987035	0	0	0	0 ± 0	0.165 ± 0.403	100	0.363217	86063	CHAIN 1-806	-->clathrin-mediated endocytosis -->membrane tubulation -->positive regulation of energy homeostasis -->positive regulation of feeding behavior -->positive regulation of receptor-mediated endocytosis -->response to dietary excess	-->AP-2 adaptor complex -->clathrin-coated vesicle -->coated pit -->cytoplasm -->plasma membrane	-->microtubule binding -->phospholipid binding -->SH3 domain binding -->tubulin binding
Membrane-associated phosphatidylinositol transfer protein 3 <sp|Q3UHE1|PITM3_MOUSE>	0	0	0	0	0	0	0	0	0.987035	0	0	0.941311	0 ± 0	0.321 ± 0.498	100	0.174838			-	-	-
Peroxisome proliferator-activated receptor gamma coactivator-related protein 1 <sp|Q6NZN1|PPRC1_MOUSE>	0	0	0	0	0	0	0	0	0	0.97023	0	0	0 ± 0	0.162 ± 0.396	100	0.363217			-	-	-
NUT family member 1 <sp|Q8BHP2|NUTM1_MOUSE>	0	0	0	0	0	0	0	0.984271	0	0	0	0	0 ± 0	0.164 ± 0.402	100	0.363217			-	-	-
Little elongation complex subunit 1 <sp|E9Q286|ICE1_MOUSE>	0	0	0	0	0	0	0	0	0	0	0	0.941311	0 ± 0	0.157 ± 0.384	100	0.363217	242254	CHAIN 1-2241	-->positive regulation of intracellular protein transport -->positive regulation of protein complex assembly -->positive regulation of transcription from RNA polymerase III promoter -->snRNA transcription from RNA polymerase III promoter -->snRNA transcription from RNA polymerase II promoter	-->Cajal body -->histone locus body -->transcriptionally active chromatin -->transcription elongation factor complex	-
Pappalysin-1 <sp|Q8R4K8|PAPP1_MOUSE>	0	0	0	0	0	0	0.978506	0	0	0	0	0	0 ± 0	0.163 ± 0.399	100	0.363217			-	-	-
Histone-lysine N-methyltransferase, H3 lysine-36 specific <sp|O88491|NSD1_MOUSE>	0	0	0	0	0	0	0	0	0	0.97023	0	0	0 ± 0	0.162 ± 0.396	100	0.363217			-	-	-
DNA mismatch repair protein Msh6 <sp|P54276|MSH6_MOUSE>	0	0	0	0	0	0	0	0	0	0.97023	0	0	0 ± 0	0.162 ± 0.396	100	0.363217	151084	CHAIN 1-1358	-->determination of adult lifespan -->DNA repair -->intrinsic apoptotic signaling pathway -->intrinsic apoptotic signaling pathway in response to DNA damage -->isotype switching -->maintenance of DNA repeat elements -->meiotic mismatch repair -->mismatch repair -->negative regulation of DNA recombination -->positive regulation of helicase activity -->reciprocal meiotic recombination -->response t…	-->cytoplasm -->Golgi apparatus -->intracellular membrane-bounded organelle -->MutSalpha complex -->nuclear chromatin -->nucleoplasm -->plasma membrane	-->ADP binding -->ATP binding -->chromatin binding -->damaged DNA binding -->DNA binding -->DNA-dependent ATPase activity -->four-way junction DNA binding -->guanine/thymine mispair binding -->magnesium ion binding -->methylated histone binding -->mismatched DNA binding -->oxidized purine DNA binding -->single base insertion or deletion binding -->single guanine insertion binding -->single thymin…
BRCA1-associated RING domain protein 1 <sp|O70445|BARD1_MOUSE>	0	0	0	0	0	0	0	0	0	0	0.9921	0	0 ± 0	0.165 ± 0.405	100	0.363217			-	-	-
ATP-dependent RNA helicase DHX29 <sp|Q6PGC1|DHX29_MOUSE>	0	0	0	0	0	0	0.978506	0	0	0	0	0	0 ± 0	0.163 ± 0.399	100	0.363217	153975	CHAIN 1-1365	-->RNA processing	-->eukaryotic 43S preinitiation complex -->mitochondrion -->nucleus	-->ATP binding -->ATP-dependent RNA helicase activity -->poly(A) RNA binding -->ribosomal small subunit binding -->translation initiation factor activity
Disheveled-associated activator of morphogenesis 2 <sp|Q80U19|DAAM2_MOUSE>	0	0	0	0	0	0	0	0	0.987035	0	0	0	0 ± 0	0.165 ± 0.403	100	0.363217	128370	CHAIN 1-1115	-->actin cytoskeleton organization -->determination of left/right symmetry	-->extracellular exosome	-
FACT complex subunit SPT16 <sp|Q920B9|SP16H_MOUSE>	0	0	0	0	0	0	0	0	0	0	0.9921	0	0 ± 0	0.165 ± 0.405	100	0.363217	119825	CHAIN 1-1047	-->DNA repair -->DNA replication -->DNA replication-independent nucleosome organization -->positive regulation of transcription elongation from RNA polymerase II promoter -->transcription elongation from RNA polymerase II promoter	-->Extracellular region or secreted Cytosol Plasma membrane Cytoskeleton Lysosome Endosome Peroxisome ER Golgi apparatus Nucleus Mitochondrion Manual annotation Automatic computational assertionGraphics by Christian Stolte; -->FACT complex -->nucleus -->chromosome	-->histone binding -->nucleosome binding
Zinc finger protein 410 <sp|Q8BKX7|ZN410_MOUSE>	0	0	0	0	0	0	0	0	0	0	0.9921	0	0 ± 0	0.165 ± 0.405	100	0.363217			-	-	-
SH3 and multiple ankyrin repeat domains protein 3 <sp|Q4ACU6|SHAN3_MOUSE>	0	0	0	0	0	0	0	0.984271	0	0	0	0	0 ± 0	0.164 ± 0.402	100	0.363217	185397	CHAIN 1-1730	-->adult behavior -->AMPA glutamate receptor clustering -->brain morphogenesis -->dendritic spine morphogenesis -->embryonic epithelial tube formation -->exploration behavior -->guanylate kinase-associated protein clustering -->learning -->learning or memory -->locomotion -->locomotory behavior -->locomotory exploration behavior -->long term synaptic depression -->long-term synaptic potentiation …	-->cell junction -->ciliary membrane -->cytoplasm -->dendritic spine -->excitatory synapse -->neuron projection -->neuron spine -->plasma membrane -->postsynaptic density -->postsynaptic membrane	-->actin binding -->GKAP/Homer scaffold activity -->ionotropic glutamate receptor binding -->protein C-terminus binding -->protein self-association -->scaffold protein binding -->SH3 domain binding -->zinc ion binding
Myosin-3 <sp|P13541|MYH3_MOUSE>	0	0	0	0	0	0	0	0	0	0	0.9921	0	0 ± 0	0.165 ± 0.405	100	0.363217	223791	CHAIN 1-1940	-->ATP catabolic process -->skeletal muscle contraction	-->contractile fiber -->extracellular vesicular exosome -->myosin complex -->myosin filament	-->ATP binding -->microfilament motor activity
Proliferation marker protein Ki-67 <sp|E9PVX6|KI67_MOUSE>	0	0	0	0	0	0	0.978506	0	0	0	0	0	0 ± 0	0.163 ± 0.399	100	0.363217	350864	CHAIN 1-3177	-->cell proliferation -->cellular response to heat -->cholangiocyte proliferation -->DNA metabolic process -->hepatocyte proliferation -->hyaluronan metabolic process -->meiotic nuclear division -->organ regeneration -->response to organic cyclic compound	-->chromosome, centromeric region -->condensed chromosome -->cytoplasm -->membrane -->nucleolus -->nucleus	-->poly(A) RNA binding -->protein C-terminus binding
Low-density lipoprotein receptor-related protein 1B <sp|Q9JI18|LRP1B_MOUSE>	0	0	0	0	0	0	0	0	0	0	0	0.941311	0 ± 0	0.157 ± 0.384	100	0.363217	513634	CHAIN 1-4599	-->in utero embryonic development	-->integral component of membrane -->membrane -->receptor complex	-->calcium ion binding -->low-density lipoprotein particle receptor binding -->low-density lipoprotein receptor activity
Down syndrome cell adhesion molecule homolog <sp|Q9ERC8|DSCAM_MOUSE>	0	0	0	0	0	0	0	0.984271	0	0	0	0	0 ± 0	0.164 ± 0.402	100	0.363217	222268	CHAIN 1-2013	-->camera-type eye photoreceptor cell differentiation -->dendrite morphogenesis -->dendrite self-avoidance -->homophilic cell adhesion via plasma membrane adhesion molecules -->locomotory behavior -->negative regulation of cell adhesion -->positive regulation of axon extension involved in axon guidance -->positive regulation of phosphorylation -->post-embryonic retina morphogenesis in camera-type…	-->axon -->cell junction -->growth cone -->integral component of plasma membrane -->plasma membrane -->synapse	-
Murinoglobulin-2 <sp|P28666|MUG2_MOUSE>	110.699	105.955	102.276	97.6591	108.421	112.122	0	0	0	0	0	0	106.189 ± 5.452	0 ± 0	-100	7.64611e-08	162382	CHAIN 1-1451	-	-->extracellular space	-->serine-type endopeptidase inhibitor activity
Ig heavy chain V region 1B43 <sp|P18532|HVM61_MOUSE>	0	1.96213	2.04553	0.996521	0.968045	0.983527	0	0	0	0	0	0	1.159 ± 0.757	0 ± 0	-100	0.0133006			-	-	-
Ig kappa chain V-V region HP R16.7 <sp|P01644|KV5AB_MOUSE>	8.12468	6.86745	7.15934	4.98261	10.6485	7.86822	0	0	0	0	0	0	7.608 ± 1.856	0 ± 0	-100	0.000167546			-	-	-
Ig kappa chain V-V region HP 93G7 <sp|P01645|KV5AC_MOUSE>	8.12468	6.86745	7.15934	4.98261	10.6485	7.86822	0	0	0	0	0	0	7.608 ± 1.856	0 ± 0	-100	0.000167546			-	-	-
Ig heavy chain V-III region E109 <sp|P01798|HVM29_MOUSE>	7.10909	12.7538	9.20487	10.9617	12.5846	9.83527	0	0	0	0	0	0	10.408 ± 2.154	0 ± 0	-100	7.58451e-05	12647.2	CHAIN 1-113	-	-	-->antigen binding
Ig heavy chain V region 186-1 <sp|P01753|HVM09_MOUSE>	8.12468	8.82958	9.20487	11.9583	12.5846	9.83527	0	0	0	0	0	0	10.09 ± 1.79	0 ± 0	-100	3.57454e-05			-	-	-
Tubulin beta-3 chain <sp|Q9ERD7|TBB3_MOUSE>	0	0	0	0	0	1.96705	0	0	0	0	0	0	0.328 ± 0.803	0 ± 0	-100	0.363217	50418.7	CHAIN 1-450	-->axon guidance -->microtubule-based process -->mitotic nuclear division -->protein polymerization	-->axon -->cell periphery -->cytoplasm -->dendrite -->intracellular -->microtubule -->microtubule cytoskeleton -->neuronal cell body	-->GTPase activity -->GTP binding -->peptide binding -->structural constituent of cytoskeleton
14-3-3 protein zeta/delta <sp|P63101|1433Z_MOUSE>	1.01558	0.981065	3.06829	0.996521	1.93609	4.91764	0	0	0	0	0	0	2.153 ± 1.583	0 ± 0	-100	0.0207711	27771.1	CHAIN 1-245	-->histamine secretion by mast cell -->protein targeting -->protein targeting to mitochondrion -->regulation of cell death -->response to drug	-->blood microparticle -->cell leading edge -->cytoplasmic vesicle membrane -->cytosol -->extracellular vesicular exosome -->mast cell granule -->mitochondrion -->nucleus -->perinuclear region of cytoplasm -->postsynaptic density -->protein complex	-->poly(A) RNA binding -->protein domain specific binding
Carboxylesterase 1E <sp|Q64176|EST1E_MOUSE>	12.187	15.697	11.2504	7.97217	7.74436	11.8023	0	0	0	0	0	0	11.109 ± 2.962	0 ± 0	-100	0.000256467	61581.7	CHAIN 1-562	-->metabolic process	-->endoplasmic reticulum lumen -->extracellular space	-->carboxylic ester hydrolase activity
EGF-containing fibulin-like extracellular matrix protein 1 <sp|Q8BPB5|FBLN3_MOUSE>	0	0.981065	2.04553	1.99304	0.968045	1.96705	0	0	0	0	0	0	1.326 ± 0.822	0 ± 0	-100	0.0108464	54952.8	CHAIN 1-493	-->camera-type eye development -->embryonic eye morphogenesis -->epidermal growth factor receptor signaling pathway -->negative regulation of chondrocyte differentiation -->peptidyl-tyrosine phosphorylation -->post-embryonic eye morphogenesis -->regulation of transcription, DNA-templated	-->extracellular exosome -->extracellular space -->proteinaceous extracellular matrix	-->calcium ion binding -->epidermal growth factor-activated receptor activity -->epidermal growth factor receptor binding -->growth factor activity
Profilin-1 <sp|P62962|PROF1_MOUSE>	0	0	0	0	0	0.983527	0	0	0	0	0	0	0.164 ± 0.402	0 ± 0	-100	0.363217	14957.2	CHAIN 1-140	-->actin cytoskeleton organization -->negative regulation of stress fiber assembly -->neural tube closure -->positive regulation of actin filament polymerization -->positive regulation of ATPase activity -->positive regulation of epithelial cell migration -->positive regulation of ruffle assembly -->regulation of actin polymerization or depolymerization -->regulation of transcription from RNA pol…	-->blood microparticle -->cytoplasm -->cytoskeleton -->cytosol -->extracellular region -->extracellular vesicular exosome -->nucleus	-->adenyl-nucleotide exchange factor activity -->phosphatidylinositol-4,5-bisphosphate binding -->poly(A) RNA binding -->Rho GTPase binding
Macrophage migration inhibitory factor <sp|P34884|MIF_MOUSE>	0	0.981065	0	0	0	0.983527	0	0	0	0	0	0	0.327 ± 0.507	0 ± 0	-100	0.174688	12504.3	CHAIN 1-115	-->carboxylic acid metabolic process -->cell aging -->cell proliferation -->cell surface receptor signaling pathway -->DNA damage response, signal transduction by p53 class mediator -->inflammatory response -->innate immune response -->negative regulation of apoptotic process -->negative regulation of cell aging -->negative regulation of cell cycle arrest -->negative regulation of cellular protei…	-->cell surface -->cytoplasm -->extracellular exosome -->extracellular region -->extracellular space -->myelin sheath -->nucleoplasm -->vesicle	-->chemoattractant activity -->cytokine activity -->cytokine receptor binding -->dopachrome isomerase activity -->phenylpyruvate tautomerase activity -->receptor binding
Tropomyosin alpha-3 chain <sp|P21107|TPM3_MOUSE>	0	0	0	0	0	1.96705	0	0	0	0	0	0	0.328 ± 0.803	0 ± 0	-100	0.363217	32994	CHAIN 1-285	-	-->cortical cytoskeleton -->cytoplasm -->extracellular exosome -->growth cone -->neuron projection -->podosome -->stress fiber	-
Nucleoside diphosphate kinase A <sp|P15532|NDKA_MOUSE>	0	0.981065	0	0	0.968045	1.96705	0	0	0	0	0	0	0.653 ± 0.802	0 ± 0	-100	0.102663	17207.8	CHAIN 1-152	-->cellular response to drug -->cellular response to fatty acid -->cellular response to glucose stimulus -->CTP biosynthetic process -->endocytosis -->GTP biosynthetic process -->hippocampus development -->lactation -->mammary gland development -->negative regulation of gene expression -->negative regulation of myeloid leukocyte differentiation -->positive regulation of DNA binding -->positive re…	-->centrosome -->cytosol -->extracellular vesicular exosome -->mitochondrion -->nucleus -->perinuclear region of cytoplasm -->ruffle membrane	-->ATP binding -->deoxyribonuclease activity -->GTP binding -->magnesium ion binding -->nucleoside diphosphate kinase activity -->poly(A) RNA binding -->ribosomal small subunit binding -->RNA polymerase II regulatory region sequence-specific DNA binding -->single-stranded DNA binding
Vimentin <sp|P20152|VIME_MOUSE>	0	0	0	0	0	0.983527	0	0	0	0	0	0	0.164 ± 0.402	0 ± 0	-100	0.363217	53687.7	CHAIN 1-466	-->astrocyte development -->Bergmann glial cell differentiation -->intermediate filament-based process -->intermediate filament organization -->lens fiber cell development -->negative regulation of neuron projection development -->positive regulation of gene expression -->SMAD protein signal transduction	-->cell leading edge -->cell projection -->cytoplasm -->cytoskeleton -->cytosol -->extracellular vesicular exosome -->intermediate filament -->neuron projection -->peroxisome -->plasma membrane -->type III intermediate filament	-->double-stranded RNA binding -->structural constituent of cytoskeleton -->structural constituent of eye lens -->structural molecule activity
Acylcarnitine hydrolase <sp|Q91WG0|EST2C_MOUSE>	1.01558	1.96213	2.04553	0.996521	0	0	0	0	0	0	0	0	1.003 ± 0.897	0 ± 0	-100	0.0407374	62469.6	CHAIN 1-561	-	-->endoplasmic reticulum -->intracellular membrane-bounded organelle	-->acylcarnitine hydrolase activity
Receptor-type tyrosine-protein phosphatase gamma <sp|Q05909|PTPRG_MOUSE>	0	0	0	0	0.968045	0	0	0	0	0	0	0	0.161 ± 0.395	0 ± 0	-100	0.363217	161242	CHAIN 1-1442	-->negative regulation of epithelial cell migration -->toxin transport	-->extracellular exosome -->integral component of membrane	-->identical protein binding -->protein tyrosine phosphatase activity
Di-N-acetylchitobiase <sp|Q8R242|DIAC_MOUSE>	0	0	0	0	0.968045	0	0	0	0	0	0	0	0.161 ± 0.395	0 ± 0	-100	0.363217			-	-	-
Tyrosine-protein kinase JAK3 <sp|Q62137|JAK3_MOUSE>	0	0	0	0.996521	0	0	0	0	0	0	0	0	0.166 ± 0.407	0 ± 0	-100	0.363217			-	-	-
Collagen alpha-4(VI) chain <sp|A2AX52|CO6A4_MOUSE>	1.01558	0.981065	1.02276	0.996521	0.968045	0.983527	0	0	0	0	0	0	0.995 ± 0.021	0 ± 0	-100	9.47361e-10	250798	CHAIN 1-2309	-->cell adhesion -->protein heterotrimerization	-->collagen trimer -->extracellular region -->proteinaceous extracellular matrix -->protein complex	-
Desmoglein-1-beta <sp|Q7TSF1|DSG1B_MOUSE>	0	0	1.02276	0	0	0.983527	0	0	0	0	0	0	0.334 ± 0.518	0 ± 0	-100	0.17479	114454	CHAIN 1-1060	-->homophilic cell adhesion via plasma membrane adhesion molecules	-->cytoplasmic side of plasma membrane -->desmosome -->extracellular exosome -->extracellular matrix -->integral component of membrane	-->calcium ion binding -->gamma-catenin binding
V-set and immunoglobulin domain-containing protein 10-like <sp|D3YZF7|VS10L_MOUSE>	0	0	1.02276	0	0.968045	0.983527	0	0	0	0	0	0	0.496 ± 0.543	0 ± 0	-100	0.0757013			-	-	-
A-kinase anchor protein 9 <sp|Q70FJ1|AKAP9_MOUSE>	3.04675	1.96213	2.04553	1.99304	2.90413	1.96705	0	0	0	0	0	0	2.32 ± 0.511	0 ± 0	-100	0.000102284	436214	CHAIN 1-3797	-->Sertoli cell development -->signal transduction -->spermatogenesis	-->centrosome -->ciliary basal body -->cytoplasm -->Golgi apparatus -->pericentriolar material	-
Ectonucleotide pyrophosphatase/phosphodiesterase family member 2 <sp|Q9R1E6|ENPP2_MOUSE>	0	0	0	0	0	0.983527	0	0	0	0	0	0	0.164 ± 0.402	0 ± 0	-100	0.363217	98885.5	CHAIN 1-862	-->chemotaxis -->immune response -->phosphatidylcholine catabolic process -->phospholipid catabolic process -->phospholipid metabolic process -->positive regulation of epithelial cell migration -->positive regulation of lamellipodium morphogenesis -->positive regulation of peptidyl-tyrosine phosphorylation -->regulation of angiogenesis -->regulation of cell migration	-->extracellular space -->integral component of plasma membrane	-->alkylglycerophosphoethanolamine phosphodiesterase activity -->calcium ion binding -->lysophospholipase activity -->nucleic acid binding -->nucleotide diphosphatase activity -->phosphodiesterase I activity -->polysaccharide binding -->scavenger receptor activity -->zinc ion binding
Ankyrin repeat domain-containing protein 42 <sp|Q3V096|ANR42_MOUSE>	0	0	1.02276	0	0	0	0	0	0	0	0	0	0.17 ± 0.418	0 ± 0	-100	0.363217			-	-	-
Protein argonaute-1 <sp|Q8CJG1|AGO1_MOUSE>	0	0	1.02276	0	0	0	0	0	0	0	0	0	0.17 ± 0.418	0 ± 0	-100	0.363217	97214.3	CHAIN 1-857	-->miRNA loading onto RISC involved in gene silencing by miRNA -->miRNA mediated inhibition of translation -->miRNA metabolic process -->negative regulation of angiogenesis -->nuclear-transcribed mRNA catabolic process -->positive regulation of gene expression -->positive regulation of NIK/NF-kappaB signaling -->positive regulation of transcription by RNA polymerase II -->pre-miRNA processing -->…	-->Extracellular region or secreted Cytosol Plasma membrane Cytoskeleton Lysosome Endosome Peroxisome ER Golgi apparatus Nucleus Mitochondrion Manual annotation Automatic computational assertionGraphics by Christian Stolte; -->cytosol -->nucleus -->cytoplasm -->intracellular ribonucleoprotein complex -->micro-ribonucleoprotein complex -->P-body -->polysome -->RISC complex -->RISC-loading complex	-->core promoter binding -->double-stranded RNA binding -->miRNA binding -->RNA binding -->RNA polymerase II core binding -->RNA polymerase II proximal promoter sequence-specific DNA binding -->single-stranded RNA binding -->transcription regulatory region DNA binding
Breast carcinoma-amplified sequence 3 homolog <sp|Q8CCN5|BCAS3_MOUSE>	0	0	1.02276	0	0	0	0	0	0	0	0	0	0.17 ± 0.418	0 ± 0	-100	0.363217			-	-	-
Aldehyde dehydrogenase, dimeric NADP-preferring <sp|P47739|AL3A1_MOUSE>	0	0	0	0	0.968045	0	0	0	0	0	0	0	0.161 ± 0.395	0 ± 0	-100	0.363217	50480.8	CHAIN 1-453	-->aging -->cellular aldehyde metabolic process -->oxidation-reduction process -->positive regulation of cell proliferation -->response to cAMP -->response to drug -->response to glucocorticoid -->response to hypoxia -->response to nutrient	-->cytoplasm -->cytosol -->endoplasmic reticulum -->extracellular space -->integral component of membrane -->intracellular membrane-bounded organelle -->nucleoplasm -->plasma membrane	-->3-chloroallyl aldehyde dehydrogenase activity -->alcohol dehydrogenase (NADP+) activity -->aldehyde dehydrogenase (NAD) activity -->aldehyde dehydrogenase [NAD(P)+] activity -->benzaldehyde dehydrogenase (NAD+) activity -->oxidoreductase activity, acting on the aldehyde or oxo group of donors, NAD or NADP as acceptor
Echinoderm microtubule-associated protein-like 1 <sp|Q05BC3|EMAL1_MOUSE>	7.10909	10.7917	10.2276	9.96521	11.6165	9.83527	0	0	0	0	0	0	9.924 ± 1.526	0 ± 0	-100	1.77427e-05			-	-	-
Tyrosine-protein kinase JAK2 <sp|Q62120|JAK2_MOUSE>	2.03117	0	1.02276	0.996521	1.93609	0.983527	0	0	0	0	0	0	1.162 ± 0.746	0 ± 0	-100	0.0124527			-	-	-
26S proteasome non-ATPase regulatory subunit 2 <sp|Q8VDM4|PSMD2_MOUSE>	0	0	0	0.996521	0	0	0	0	0	0	0	0	0.166 ± 0.407	0 ± 0	-100	0.363217	100203	CHAIN 1-908	-->regulation of protein catabolic process	-->proteasome accessory complex -->proteasome complex -->proteasome regulatory particle	-->enzyme regulator activity
Neuroplastin <sp|P97300|NPTN_MOUSE>	0	0.981065	0	0	0	0	0	0	0	0	0	0	0.164 ± 0.401	0 ± 0	-100	0.363217	44373.1	CHAIN 1-397	-->homophilic cell adhesion via plasma membrane adhesion molecules -->long-term synaptic potentiation -->positive regulation of cytosolic calcium ion concentration -->positive regulation of fibroblast growth factor receptor signaling pathway -->positive regulation of long-term neuronal synaptic plasticity -->positive regulation of neuron projection development -->positive regulation of protein ph…	-->cell surface -->integral component of membrane -->presynaptic membrane	-->cell adhesion molecule binding -->transmembrane receptor protein tyrosine kinase activity -->type 1 fibroblast growth factor receptor binding
Regulating synaptic membrane exocytosis protein 1 <sp|Q99NE5|RIMS1_MOUSE>	0	0	0	0	0.968045	0.983527	0	0	0	0	0	0	0.325 ± 0.504	0 ± 0	-100	0.174705			-	-	-
Very long-chain specific acyl-CoA dehydrogenase, mitochondrial <sp|P50544|ACADV_MOUSE>	1.01558	0	0	0	0	0	0	0	0	0	0	0	0.169 ± 0.415	0 ± 0	-100	0.363217	70875.5	CHAIN 1-656	-->epithelial cell differentiation -->fatty acid beta-oxidation using acyl-CoA dehydrogenase -->negative regulation of fatty acid biosynthetic process -->negative regulation of fatty acid oxidation -->regulation of cholesterol metabolic process -->temperature homeostasis	-->mitochondrial inner membrane -->mitochondrial nucleoid -->mitochondrion -->nucleolus	-->acyl-CoA dehydrogenase activity -->flavin adenine dinucleotide binding
Smoothelin <sp|Q921U8|SMTN_MOUSE>	1.01558	0	0	0	0	0	0	0	0	0	0	0	0.169 ± 0.415	0 ± 0	-100	0.363217	100289	CHAIN 1-923	-	-->cytoplasm -->cytoskeleton	-
PHD finger protein 20 <sp|Q8BLG0|PHF20_MOUSE>	0	0.981065	1.02276	0	0	0	0	0	0	0	0	0	0.334 ± 0.518	0 ± 0	-100	0.174803	115280	CHAIN 1-1010	-->histone H4-K16 acetylation -->histone H4-K5 acetylation -->histone H4-K8 acetylation -->regulation of transcription, DNA-templated -->transcription, DNA-templated	-->cytoplasm -->histone acetyltransferase complex -->MLL1 complex -->nuclear membrane -->nucleoplasm	-->DNA binding -->histone acetyltransferase activity (H4-K16 specific) -->histone acetyltransferase activity (H4-K5 specific) -->histone acetyltransferase activity (H4-K8 specific) -->zinc ion binding
Extended synaptotagmin-1 <sp|Q3U7R1|ESYT1_MOUSE>	0	0	0	0.996521	0.968045	0	0	0	0	0	0	0	0.327 ± 0.507	0 ± 0	-100	0.174744	121554	CHAIN 1-1092	-->lipid transport	-->integral component of endoplasmic reticulum membrane -->plasma membrane	-->lipid binding -->metal ion binding
Alstrom syndrome protein 1 homolog <sp|Q8K4E0|ALMS1_MOUSE>	0	0	0	0	0	1.96705	0	0	0	0	0	0	0.328 ± 0.803	0 ± 0	-100	0.363217	360215	CHAIN 1-3251	-->calcium-mediated signaling -->cellular glucose homeostasis -->cholesterol homeostasis -->cilium assembly -->endosomal transport -->epithelial cell proliferation -->establishment of planar polarity -->fat cell differentiation -->glucose homeostasis -->inner ear receptor stereocilium organization -->lipid metabolic process -->negative regulation of apoptotic process -->negative regulation of mul…	-->centriole -->centrosome -->ciliary basal body -->cytoplasm -->nucleus -->spindle pole	-->alpha-actinin binding
tRNA-dihydrouridine(20) synthase [NAD(P)+]-like <sp|Q9D7B1|DUS2L_MOUSE>	1.01558	0.981065	1.02276	0	0.968045	0.983527	0	0	0	0	0	0	0.828 ± 0.406	0 ± 0	-100	0.00412868			-	-	-
Cyclin-dependent kinase 13 <sp|Q69ZA1|CDK13_MOUSE>	0	0	1.02276	0	0	0	0	0	0	0	0	0	0.17 ± 0.418	0 ± 0	-100	0.363217	164553	CHAIN 1-1511	-->alternative mRNA splicing, via spliceosome -->hemopoiesis -->phosphorylation of RNA polymerase II C-terminal domain	-->cyclin K-CDK13 complex -->cytoplasm -->extracellular space -->Golgi apparatus -->nuclear cyclin-dependent protein kinase holoenzyme complex -->nuclear speck -->nucleoplasm	-->ATP binding -->cyclin binding -->cyclin-dependent protein serine/threonine kinase activity -->poly(A) RNA binding -->RNA polymerase II carboxy-terminal domain kinase activity
Ubiquitin carboxyl-terminal hydrolase 21 <sp|Q9QZL6|UBP21_MOUSE>	0	0	1.02276	0	0	0	0	0	0	0	0	0	0.17 ± 0.418	0 ± 0	-100	0.363217	62672.8	CHAIN 1-566	-->histone deubiquitination -->positive regulation of transcription, DNA-templated -->transcription, DNA-templated -->ubiquitin-dependent protein catabolic process	-->cytoplasm -->nucleoplasm -->nucleus -->plasma membrane	-->cysteine-type peptidase activity -->metal ion binding -->NEDD8-specific protease activity -->thiol-dependent ubiquitin-specific protease activity -->transcription coactivator activity
Nucleoprotein TPR <sp|F6ZDS4|TPR_MOUSE>	0	0.981065	1.02276	0.996521	0	0	0	0	0	0	0	0	0.5 ± 0.548	0 ± 0	-100	0.0756497	273990	CHAIN 1-2431	-->cellular response to heat -->cellular response to interferon-alpha -->MAPK import into nucleus -->mitotic nuclear division -->mitotic spindle assembly checkpoint -->mRNA export from nucleus in response to heat stress -->negative regulation of RNA export from nucleus -->negative regulation of transcription from RNA polymerase II promoter -->negative regulation of translational initiation -->nuc…	-->cytoplasm -->cytoplasmic dynein complex -->extrinsic component of membrane -->kinetochore -->mitotic spindle -->nuclear envelope -->nuclear inclusion body -->nuclear membrane -->nuclear periphery -->nuclear pore -->nuclear pore nuclear basket	-->chromatin binding -->heat shock protein binding -->mitogen-activated protein kinase binding -->mRNA binding -->nucleocytoplasmic transporter activity -->protein homodimerization activity
Histone acetyltransferase KAT6A <sp|Q8BZ21|KAT6A_MOUSE>	0	0.981065	1.02276	0.996521	0	0	0	0	0	0	0	0	0.5 ± 0.548	0 ± 0	-100	0.0756497	224919	CHAIN 1-2003	-->aorta morphogenesis -->cellular senescence -->embryonic hemopoiesis -->face morphogenesis -->heart morphogenesis -->histone acetylation -->histone H3 acetylation -->myeloid cell differentiation -->negative regulation of sequence-specific DNA binding transcription factor activity -->negative regulation of transcription, DNA-templated -->nucleosome assembly -->positive regulation of transcriptio…	-->Golgi apparatus -->MOZ/MORF histone acetyltransferase complex -->nucleolus -->nucleoplasm -->nucleosome -->nucleus -->PML body	-->acetyltransferase activity -->chromatin binding -->DNA binding -->histone acetyltransferase activity -->transcription coactivator activity -->transcription factor binding -->zinc ion binding
A disintegrin and metalloproteinase with thrombospondin motifs 7 <sp|Q68SA9|ATS7_MOUSE>	0	0.981065	1.02276	0	0	0.983527	0	0	0	0	0	0	0.498 ± 0.546	0 ± 0	-100	0.0756649			-	-	-
RNA-binding Raly-like protein <sp|Q8BTF8|RALYL_MOUSE>	1.01558	0.981065	1.02276	0.996521	0.968045	0	0	0	0	0	0	0	0.831 ± 0.407	0 ± 0	-100	0.00412705	32451.5	CHAIN 1-293	-	-->Extracellular region or secreted Cytosol Plasma membrane Cytoskeleton Lysosome Endosome Peroxisome ER Golgi apparatus Nucleus Mitochondrion Manual annotation Automatic computational assertionGraphics by Christian Stolte; -->nucleus	-->identical protein binding -->RNA binding
Collagen alpha-2(VI) chain <sp|Q02788|CO6A2_MOUSE>	0	0.981065	0	0	0	0	0	0	0	0	0	0	0.164 ± 0.401	0 ± 0	-100	0.363217	110334	CHAIN 1-1034	-->cell adhesion -->protein heterotrimerization -->response to glucose	-->collagen trimer -->extracellular matrix -->extracellular region -->extracellular space -->extracellular vesicular exosome -->proteinaceous extracellular matrix -->protein complex -->sarcolemma	-
Bifunctional purine biosynthesis protein ATIC <sp|Q9CWJ9|PUR9_MOUSE>	1.01558	0	1.02276	0.996521	0.968045	0	0	0	0	0	0	0	0.667 ± 0.517	0 ± 0	-100	0.0250907	64217.4	CHAIN 1-592	-->'de novo' IMP biosynthetic process -->brainstem development -->cerebellum development -->cerebral cortex development -->dihydrofolate metabolic process -->nucleoside metabolic process -->organ regeneration -->response to inorganic substance -->tetrahydrofolate biosynthetic process	-->extracellular vesicular exosome -->membrane -->mitochondrion	-->IMP cyclohydrolase activity -->phosphoribosylaminoimidazolecarboxamide formyltransferase activity -->protein homodimerization activity
Erythroid differentiation-related factor 1 <sp|Q6GQV7|EDRF1_MOUSE>	0	0	0	0.996521	0.968045	0	0	0	0	0	0	0	0.327 ± 0.507	0 ± 0	-100	0.174744			-	-	-
Dynein heavy chain 2, axonemal <sp|P0C6F1|DYH2_MOUSE>	0	0	0	0	0.968045	0	0	0	0	0	0	0	0.161 ± 0.395	0 ± 0	-100	0.363217	511565	CHAIN 1-4456	-->microtubule-based movement	-->inner dynein arm -->microtubule	-->ATPase activity -->ATP binding -->microtubule motor activity
Laminin subunit beta-1 <sp|P02469|LAMB1_MOUSE>	1.01558	1.96213	1.02276	1.99304	0.968045	1.96705	0	0	0	0	0	0	1.488 ± 0.533	0 ± 0	-100	0.00101845	197090	CHAIN 1-1786	-->cell adhesion -->cell migration -->embryo implantation -->learning or memory -->negative regulation of cell adhesion -->neuron projection development -->odontogenesis -->positive regulation of cell migration	-->basal lamina -->basement membrane -->extracellular region -->laminin-10 complex -->laminin-1 complex -->laminin-2 complex -->laminin-8 complex -->laminin complex -->perinuclear region of cytoplasm -->proteinaceous extracellular matrix	-->enzyme binding -->extracellular matrix structural constituent -->glycosphingolipid binding -->integrin binding
Brefeldin A-inhibited guanine nucleotide-exchange protein 2 <sp|A2A5R2|BIG2_MOUSE>	0	0	0	0	0	0.983527	0	0	0	0	0	0	0.164 ± 0.402	0 ± 0	-100	0.363217	202240	CHAIN 1-1792	-->endomembrane system organization -->endosome organization -->exocytosis -->Golgi to plasma membrane transport -->intracellular signal transduction -->positive regulation of GTPase activity -->positive regulation of tumor necrosis factor production -->protein transport -->receptor recycling -->regulation of ARF protein signal transduction -->vesicle-mediated transport	-->asymmetric synapse -->axonemal microtubule -->cell junction -->cytoplasmic membrane-bounded vesicle -->cytoplasmic vesicle -->cytosol -->dendritic spine -->Golgi membrane -->membrane -->microtubule organizing center -->perinuclear region of cytoplasm -->recycling endosome -->symmetric synapse -->trans-Golgi network	-->ARF guanyl-nucleotide exchange factor activity -->GABA receptor binding -->guanyl-nucleotide exchange factor activity -->protein kinase A regulatory subunit binding
E3 ubiquitin-protein ligase UBR5 <sp|Q80TP3|UBR5_MOUSE>	0	0	0	0.996521	0	0	0	0	0	0	0	0	0.166 ± 0.407	0 ± 0	-100	0.363217	308352	CHAIN 1-2792	-->cellular response to DNA damage stimulus -->DNA repair -->negative regulation of double-strand break repair -->negative regulation of histone H2A K63-linked ubiquitination -->positive regulation of canonical Wnt signaling pathway -->positive regulation of catenin import into nucleus -->positive regulation of protein import into nucleus, translocation -->progesterone receptor signaling pathway …	-->cytoplasm -->membrane -->nucleoplasm -->nucleus	-->ligase activity -->RNA binding -->ubiquitin-protein transferase activity -->ubiquitin-ubiquitin ligase activity -->zinc ion binding
Transport and Golgi organization protein 1 homolog <sp|Q8BI84|TGO1_MOUSE>	0	0	1.02276	0	0	0	0	0	0	0	0	0	0.17 ± 0.418	0 ± 0	-100	0.363217	213675	CHAIN 1-1930	-->chondrocyte development -->collagen fibril organization -->exocytosis -->negative regulation of cell adhesion -->negative regulation of cell migration -->positive regulation of bone mineralization -->positive regulation of leukocyte migration -->protein transport -->wound healing	-->endoplasmic reticulum membrane -->integral component of membrane -->intracellular membrane-bounded organelle -->membrane	-
General transcription factor 3C polypeptide 5 <sp|Q8R2T8|TF3C5_MOUSE>	0	0.981065	0	0	0	0	0	0	0	0	0	0	0.164 ± 0.401	0 ± 0	-100	0.363217			-	-	-
Oxysterol-binding protein 1 <sp|Q3B7Z2|OSBP1_MOUSE>	0	0.981065	1.02276	0	0	0	0	0	0	0	0	0	0.334 ± 0.518	0 ± 0	-100	0.174803	88796.6	CHAIN 1-805	-->positive regulation of growth of symbiont in host -->sterol transport	-->Extracellular region or secreted Cytosol Plasma membrane Cytoskeleton Lysosome Endosome Peroxisome ER Golgi apparatus Nucleus Mitochondrion Manual annotation Automatic computational assertionGraphics by Christian Stolte; -->cytosol -->endoplasmic reticulum membrane -->Golgi apparatus -->Golgi membrane -->nucleolus -->nucleoplasm -->nucleus -->cell junction -->cytoplasm -->membrane -->perinucle…	-->phosphatidylinositol-4-phosphate binding -->protein domain specific binding -->sterol transporter activity
T-complex protein 1 subunit theta <sp|P42932|TCPQ_MOUSE>	0	0.981065	0	0	0	0	0	0	0	0	0	0	0.164 ± 0.401	0 ± 0	-100	0.363217	59555.5	CHAIN 1-548	-->binding of sperm to zona pellucida -->pore complex assembly -->protein folding -->toxin transport	-->aggresome -->cell body -->centrosome -->chaperonin-containing T-complex -->cytoplasm -->cytosol -->extracellular vesicular exosome -->intermediate filament cytoskeleton -->microtubule -->zona pellucida receptor complex	-->ATP binding
Probable global transcription activator SNF2L1 <sp|Q6PGB8|SMCA1_MOUSE>	1.01558	0.981065	0	0.996521	0.968045	0	0	0	0	0	0	0	0.66 ± 0.512	0 ± 0	-100	0.0250738	121715	CHAIN 1-1046	-->ATP-dependent chromatin remodeling -->brain development -->chromatin remodeling -->DNA strand renaturation -->neuron differentiation -->positive regulation of transcription, DNA-templated -->regulation of neural precursor cell proliferation -->regulation of transcription, DNA-templated -->transcription, DNA-templated	-->CERF complex -->nuclear chromatin -->nucleus -->NURF complex	-->annealing helicase activity -->ATPase activity -->ATP binding -->chromatin binding -->DNA binding -->helicase activity
CXXC-type zinc finger protein 4 <sp|Q6NXI8|CXXC4_MOUSE>	0	1.96213	1.02276	0.996521	0	0	0	0	0	0	0	0	0.664 ± 0.806	0 ± 0	-100	0.0997558			-	-	-
Dynein heavy chain 8, axonemal <sp|Q91XQ0|DYH8_MOUSE>	0	0.981065	0	0	0	0	0	0	0	0	0	0	0.164 ± 0.401	0 ± 0	-100	0.363217	541238	CHAIN 1-4731	-->microtubule-based movement	-->dynein complex -->microtubule -->outer dynein arm -->sperm principal piece	-->ATPase activity -->ATP binding -->microtubule motor activity
E3 ubiquitin-protein ligase UBR4 <sp|A2AN08|UBR4_MOUSE>	0	0	0	0	0	0.983527	0	0	0	0	0	0	0.164 ± 0.402	0 ± 0	-100	0.363217	572290	CHAIN 1-5180	-->protein ubiquitination involved in ubiquitin-dependent protein catabolic process	-->centrosome -->cytoplasm -->integral component of membrane -->membrane -->nucleoplasm	-->ligase activity -->ubiquitin-protein transferase activity -->zinc ion binding
Trophoblast glycoprotein-like <sp|Q8C013|TPBGL_MOUSE>	0	0	0	0.996521	0	0	0	0	0	0	0	0	0.166 ± 0.407	0 ± 0	-100	0.363217			-	-	-
Proton channel OTOP1 <sp|Q80VM9|OTOP1_MOUSE>	0	0	0	0	0	0.983527	0	0	0	0	0	0	0.164 ± 0.402	0 ± 0	-100	0.363217			-	-	-
Protein TOPAZ1 <sp|E5FYH1|TOPZ1_MOUSE>	0	0	0	0.996521	0	0	0	0	0	0	0	0	0.166 ± 0.407	0 ± 0	-100	0.363217	185487	CHAIN 1-1653	-	-->cytosol	-->metal ion binding
Dedicator of cytokinesis protein 3 <sp|Q8CIQ7|DOCK3_MOUSE>	0	0	0	0	0.968045	0	0	0	0	0	0	0	0.161 ± 0.395	0 ± 0	-100	0.363217			-	-	-
Methionine--tRNA ligase, mitochondrial <sp|Q499X9|SYMM_MOUSE>	0	0	0	0	0	0.983527	0	0	0	0	0	0	0.164 ± 0.402	0 ± 0	-100	0.363217			-	-	-
GTP-binding protein 2 <sp|Q3UJK4|GTPB2_MOUSE>	0	0	0	0.996521	0	0	0	0	0	0	0	0	0.166 ± 0.407	0 ± 0	-100	0.363217			-	-	-
Dynein heavy chain 5, axonemal <sp|Q8VHE6|DYH5_MOUSE>	0	0.981065	0	0	0	0	0	0	0	0	0	0	0.164 ± 0.401	0 ± 0	-100	0.363217	527558	CHAIN 1-4621	-->cilium movement -->lateral ventricle development -->left/right axis specification -->metabolic process	-->axonemal dynein complex -->axoneme -->microtubule	-->ATPase activity -->ATP binding -->microtubule motor activity
PCNA-interacting partner <sp|Q6IRT3|PARI_MOUSE>	0	0	0	0.996521	0	0	0	0	0	0	0	0	0.166 ± 0.407	0 ± 0	-100	0.363217			-	-	-
Receptor-type tyrosine-protein phosphatase beta <sp|B2RU80|PTPRB_MOUSE>	0	0.981065	0	0	0	0	0	0	0	0	0	0	0.164 ± 0.401	0 ± 0	-100	0.363217			-	-	-
Disco-interacting protein 2 homolog B <sp|Q3UH60|DIP2B_MOUSE>	0	0	0	0	0	0.983527	0	0	0	0	0	0	0.164 ± 0.402	0 ± 0	-100	0.363217	171126	CHAIN 1-1574	-->metabolic process	-->cytoplasm -->extracellular exosome -->membrane -->nucleus	-->catalytic activity
Inactive tyrosine-protein kinase PRAG1 <sp|Q571I4|PRAG1_MOUSE>	0	0	0	0	0.968045	0	0	0	0	0	0	0	0.161 ± 0.395	0 ± 0	-100	0.363217	126639	CHAIN 1-1179	-	-	-->ATP binding -->non-membrane spanning protein tyrosine kinase activity -->protein kinase activity
Alpha-catulin <sp|O88327|CTNL1_MOUSE>	0	0	0	0.996521	0.968045	0	0	0	0	0	0	0	0.327 ± 0.507	0 ± 0	-100	0.174744			-	-	-
Unconventional myosin-X <sp|F8VQB6|MYO10_MOUSE>	0	0	0	0	0.968045	0	0	0	0	0	0	0	0.161 ± 0.395	0 ± 0	-100	0.363217	237323	CHAIN 1-2062	-->cell motility -->cytoskeleton-dependent intracellular transport -->positive regulation of cell-cell adhesion -->regulation of cell shape -->regulation of filopodium assembly	-->cell cortex -->cytoplasm -->cytosol -->filopodium -->filopodium membrane -->filopodium tip -->lamellipodium -->myosin complex -->neuronal cell body -->neuron projection -->nucleolus -->plasma membrane -->ruffle	-->actin-dependent ATPase activity -->actin filament binding -->ATP binding -->motor activity -->phosphatidylinositol-3,4,5-trisphosphate binding -->plus-end directed microfilament motor activity -->spectrin binding
Breast cancer type 1 susceptibility protein homolog <sp|P48754|BRCA1_MOUSE>	0	0	0	0.996521	0	0	0	0	0	0	0	0	0.166 ± 0.407	0 ± 0	-100	0.363217	198795	CHAIN 1-1812	-->cellular response to DNA damage stimulus -->cellular response to indole-3-methanol -->cellular response to tumor necrosis factor -->centrosome cycle -->centrosome duplication -->chordate embryonic development -->chromosome breakage -->chromosome segregation -->DNA replication -->dosage compensation by inactivation of X chromosome -->double-strand break repair -->double-strand break repair via …	-->BRCA1-A complex -->BRCA1-BARD1 complex -->centrosome -->chromosome -->condensed chromosome -->condensed nuclear chromosome -->cytoplasm -->nucleoplasm -->nucleus -->plasma membrane -->protein complex -->ribonucleoprotein complex	-->damaged DNA binding -->enzyme binding -->ligase activity -->RNA binding -->transcription regulatory region DNA binding -->ubiquitin protein ligase binding -->ubiquitin-protein transferase activity -->zinc ion binding
Protein FAM135B <sp|Q9DAI6|F135B_MOUSE>	0	0	0	0	0	0.983527	0	0	0	0	0	0	0.164 ± 0.402	0 ± 0	-100	0.363217			-	-	-
Plectin <sp|Q9QXS1|PLEC_MOUSE>	0	0.981065	0	0	0	0	0	0	0	0	0	0	0.164 ± 0.401	0 ± 0	-100	0.363217	534216	CHAIN 1-4691	-->hemidesmosome assembly	-->contractile fiber -->extracellular vesicular exosome -->focal adhesion -->hemidesmosome -->intermediate filament cytoskeleton -->sarcolemma	-->poly(A) RNA binding -->structural constituent of muscle
5'-3' exoribonuclease 1 <sp|P97789|XRN1_MOUSE>	0	0	0	0	0.968045	0.983527	0	0	0	0	0	0	0.325 ± 0.504	0 ± 0	-100	0.174705			-	-	-
Coiled-coil domain-containing protein 102A <sp|Q3TMW1|C102A_MOUSE>	0	0	0	0	0.968045	0	0	0	0	0	0	0	0.161 ± 0.395	0 ± 0	-100	0.363217	62624	CHAIN 1-549	-	-->myosin complex	-->motor activity
Guanine nucleotide exchange factor DBS <sp|Q64096|MCF2L_MOUSE>	1.01558	0	0	0	0	0	0	0	0	0	0	0	0.169 ± 0.415	0 ± 0	-100	0.363217			-	-	-
Cancer-associated gene 1 protein homolog <sp|Q5IR70|CAGE1_MOUSE>	1.01558	0	0	0	0	0	0	0	0	0	0	0	0.169 ± 0.415	0 ± 0	-100	0.363217			-	-	-
Trans-acting T-cell-specific transcription factor GATA-3 <sp|P23772|GATA3_MOUSE>	0	0	0	0	0.968045	0.983527	0	0	0	0	0	0	0.325 ± 0.504	0 ± 0	-100	0.174705			-	-	-
Tandem C2 domains nuclear protein <sp|Q91XT6|TAC2N_MOUSE>	0	0	1.02276	0	0	0	0	0	0	0	0	0	0.17 ± 0.418	0 ± 0	-100	0.363217			-	-	-
Sodium/calcium exchanger 2 <sp|Q8K596|NAC2_MOUSE>	1.01558	0.981065	1.02276	0.996521	0	0.983527	0	0	0	0	0	0	0.833 ± 0.409	0 ± 0	-100	0.00411953	100711	CHAIN 1-921	-->cell communication	-->integral component of membrane	-->calcium:sodium antiporter activity
E3 ubiquitin-protein ligase RBBP6 <sp|P97868|RBBP6_MOUSE>	0	0	0	0.996521	0	0	0	0	0	0	0	0	0.166 ± 0.407	0 ± 0	-100	0.363217	199587	CHAIN 1-1790	-->cellular response to DNA damage stimulus -->DNA replication -->embryonic organ development -->in utero embryonic development -->multicellular organism growth -->protein ubiquitination involved in ubiquitin-dependent protein catabolic process -->regulation of DNA replication -->somite development	-->chromosome -->cytoplasm -->microtubule organizing center -->nucleolus -->nucleoplasm	-->ligase activity -->poly(A) RNA binding -->ubiquitin protein ligase activity -->ubiquitin-protein transferase activity -->zinc ion binding
DNA polymerase subunit gamma-1 <sp|P54099|DPOG1_MOUSE>	0	0	0	0	0.968045	0	0	0	0	0	0	0	0.161 ± 0.395	0 ± 0	-100	0.363217			-	-	-
Histidine--tRNA ligase, mitochondrial <sp|Q99KK9|SYHM_MOUSE>	1.01558	0	0	0	0	0.983527	0	0	0	0	0	0	0.333 ± 0.516	0 ± 0	-100	0.174756	56985.3	CHAIN 1-505	-->histidyl-tRNA aminoacylation	-->mitochondrial matrix -->mitochondrion	-->ATP binding -->histidine-tRNA ligase activity -->protein homodimerization activity -->RNA binding
Poly [ADP-ribose] polymerase 1 <sp|P11103|PARP1_MOUSE>	0	0	1.02276	0	0	0	0	0	0	0	0	0	0.17 ± 0.418	0 ± 0	-100	0.363217	113100	CHAIN 1-1013	-->base-excision repair -->behavioral response to cocaine -->cellular response to DNA damage stimulus -->cellular response to insulin stimulus -->cellular response to oxidative stress -->cellular response to superoxide -->DNA ligation involved in DNA repair -->DNA metabolic process -->DNA repair -->double-strand break repair -->lagging strand elongation -->mitochondrial DNA metabolic process -->m…	-->cytoplasm -->membrane -->mitochondrion -->nuclear chromosome, telomeric region -->nuclear envelope -->nucleolus -->nucleoplasm -->nucleus -->protein complex -->transcription factor complex	-->chromatin binding -->DNA binding -->DNA ligase (ATP) activity -->enzyme binding -->identical protein binding -->NAD+ ADP-ribosyltransferase activity -->NAD binding -->poly(A) RNA binding -->protein ADP-ribosylase activity -->protein kinase binding -->protein N-terminus binding -->transcription factor binding -->zinc ion binding
Myosin-11 <sp|O08638|MYH11_MOUSE>	1.01558	0	0	0.996521	0.968045	0	0	0	0	0	0	0	0.497 ± 0.544	0 ± 0	-100	0.0756689	227028	CHAIN 1-1972	-->cardiac muscle fiber development -->elastic fiber assembly -->metabolic process -->skeletal muscle myosin thick filament assembly -->smooth muscle contraction	-->muscle myosin complex -->myosin complex -->myosin filament -->smooth muscle contractile fiber -->stress fiber	-->ATP binding -->motor activity -->structural constituent of muscle
Filamin A-interacting protein 1-like <sp|Q6P6L0|FIL1L_MOUSE>	0	0.981065	0	0	0	0	0	0	0	0	0	0	0.164 ± 0.401	0 ± 0	-100	0.363217	129772	CHAIN 1-1131	-	-->cytoplasm -->membrane -->nucleus	-
Multiple C2 and transmembrane domain-containing protein 1 <sp|E9PV86|MCTP1_MOUSE>	0	0.981065	0	0	0	0	0	0	0	0	0	0	0.164 ± 0.401	0 ± 0	-100	0.363217	106795	CHAIN 1-951	-	-->endoplasmic reticulum -->integral component of membrane	-->calcium ion binding
Aspartate aminotransferase, mitochondrial <sp|P05202|AATM_MOUSE>	0	0	0	0.996521	0.968045	0	0	0	0	0	0	0	0.327 ± 0.507	0 ± 0	-100	0.174744	47411.4	CHAIN 1-430	-->2-oxoglutarate metabolic process -->aspartate biosynthetic process -->aspartate catabolic process -->aspartate metabolic process -->fatty acid transport -->glutamate catabolic process to 2-oxoglutarate -->glutamate catabolic process to aspartate -->glutamate metabolic process -->oxaloacetate metabolic process -->response to ethanol	-->extracellular vesicular exosome -->mitochondrial inner membrane -->mitochondrion -->plasma membrane	-->kynurenine-oxoglutarate transaminase activity -->L-aspartate:2-oxoglutarate aminotransferase activity -->L-phenylalanine:2-oxoglutarate aminotransferase activity -->poly(A) RNA binding -->pyridoxal phosphate binding
Transmembrane protein 180 <sp|Q6PDE8|MF13A_MOUSE>	0	0.981065	0	0	0	0	0	0	0	0	0	0	0.164 ± 0.401	0 ± 0	-100	0.363217			-	-	-
Netrin receptor UNC5D <sp|Q8K1S2|UNC5D_MOUSE>	0	0.981065	1.02276	0.996521	0.968045	0.983527	0	0	0	0	0	0	0.825 ± 0.405	0 ± 0	-100	0.00412321	106352	CHAIN 1-956	-->apoptotic process -->axon guidance -->cell-cell adhesion -->pyramidal neuron differentiation -->regulation of neuron migration -->signal transduction	-->cell surface -->integral component of membrane -->plasma membrane	-
Roundabout homolog 3 <sp|Q9Z2I4|ROBO3_MOUSE>	1.01558	0	0	0	0	0	0	0	0	0	0	0	0.169 ± 0.415	0 ± 0	-100	0.363217			-	-	-
Cysteine-rich secretory protein 1 <sp|Q03401|CRIS1_MOUSE>	0	0	0	0.996521	0	0	0	0	0	0	0	0	0.166 ± 0.407	0 ± 0	-100	0.363217			-	-	-
Cartilage intermediate layer protein 1 <sp|Q66K08|CILP1_MOUSE>	0	0.981065	0	0	0	0	0	0	0	0	0	0	0.164 ± 0.401	0 ± 0	-100	0.363217			-	-	-
Arf-GAP with Rho-GAP domain, ANK repeat and PH domain-containing protein 2 <sp|Q8BZ05|ARAP2_MOUSE>	0	0	1.02276	0.996521	0	0	0	0	0	0	0	0	0.337 ± 0.521	0 ± 0	-100	0.174733			-	-	-
1-phosphatidylinositol 4,5-bisphosphate phosphodiesterase epsilon-1 <sp|Q8K4S1|PLCE1_MOUSE>	1.01558	0.981065	0	0	0	0	0	0	0	0	0	0	0.333 ± 0.516	0 ± 0	-100	0.174768	255047	CHAIN 1-2282	-->activation of MAPK activity -->glomerulus development -->lipid catabolic process -->phospholipase C-activating G-protein coupled receptor signaling pathway -->Ras protein signal transduction -->regulation of G-protein coupled receptor protein signaling pathway -->regulation of protein kinase activity -->regulation of Ras protein signal transduction	-->cytoplasm -->cytosol -->Golgi membrane -->plasma membrane	-->enzyme binding -->guanyl-nucleotide exchange factor activity -->phosphatidylinositol phospholipase C activity -->phospholipase C activity -->signal transducer activity
Cysteine-rich PDZ-binding protein <sp|O70333|CRIPT_MOUSE>	0	0	0	0.996521	0	0	0	0	0	0	0	0	0.166 ± 0.407	0 ± 0	-100	0.363217			-	-	-
Tensin-3 <sp|Q5SSZ5|TENS3_MOUSE>	0	0	1.02276	0	0	0	0	0	0	0	0	0	0.17 ± 0.418	0 ± 0	-100	0.363217	155589	CHAIN 1-1440	-->cell migration -->lung alveolus development -->positive regulation of cell proliferation	-->cytoplasm -->focal adhesion	-
Protein FAM135A <sp|Q6NS59|F135A_MOUSE>	0	0	0	0	0.968045	0	0	0	0	0	0	0	0.161 ± 0.395	0 ± 0	-100	0.363217	166857	CHAIN 1-1506	-->cellular lipid metabolic process	-	-->carboxylic ester hydrolase activity
Homeobox protein Hox-B4 <sp|P10284|HXB4_MOUSE>	0	0	0	0.996521	0	0	0	0	0	0	0	0	0.166 ± 0.407	0 ± 0	-100	0.363217			-	-	-
Extracellular matrix protein FRAS1 <sp|Q80T14|FRAS1_MOUSE>	0	0	0	0	0	0.983527	0	0	0	0	0	0	0.164 ± 0.402	0 ± 0	-100	0.363217	442369	CHAIN 1-4010	-->cell communication -->embryonic limb morphogenesis -->metanephros morphogenesis -->morphogenesis of an epithelium -->palate development -->protein transport -->skin development	-->basement membrane -->integral component of membrane -->plasma membrane -->sublamina densa	-->metal ion binding
Tubulin epsilon chain <sp|Q9D6T1|TBE_MOUSE>	0	0	0	0	0.968045	0	0	0	0	0	0	0	0.161 ± 0.395	0 ± 0	-100	0.363217			-	-	-
72 kDa type IV collagenase <sp|P33434|MMP2_MOUSE>	0	0	1.02276	1.99304	0	0	0	0	0	0	0	0	0.503 ± 0.837	0 ± 0	-100	0.201243			-	-	-
RNA-splicing ligase RtcB homolog <sp|Q99LF4|RTCB_MOUSE>	0	0	0	0	0	0.983527	0	0	0	0	0	0	0.164 ± 0.402	0 ± 0	-100	0.363217	55249.3	CHAIN 1-505	-->in utero embryonic development -->placenta development -->tRNA splicing, via endonucleolytic cleavage and ligation	-->cytoplasm -->endoplasmic reticulum membrane -->nuclear envelope -->nucleus -->tRNA-splicing ligase complex	-->ATP binding -->metal ion binding -->poly(A) RNA binding -->RNA ligase (ATP) activity -->vinculin binding
Unconventional myosin-Ih <sp|Q9D6A1|MYO1H_MOUSE>	0	0	0	0	0	0.983527	0	0	0	0	0	0	0.164 ± 0.402	0 ± 0	-100	0.363217			-	-	-
Cap-specific mRNA (nucleoside-2'-O-)-methyltransferase 1 <sp|Q9DBC3|CMTR1_MOUSE>	1.01558	0	0	0	0	0	0	0	0	0	0	0	0.169 ± 0.415	0 ± 0	-100	0.363217	95676.3	CHAIN 1-837	-->7-methylguanosine mRNA capping -->cap1 mRNA methylation -->mRNA methylation	-->Extracellular region or secreted Cytosol Plasma membrane Cytoskeleton Lysosome Endosome Peroxisome ER Golgi apparatus Nucleus Mitochondrion Manual annotation Automatic computational assertionGraphics by Christian Stolte; -->cytosol -->nucleoplasm -->nucleus	-->mRNA (nucleoside-2'-O-)-methyltransferase activity -->nucleic acid binding
Epiplakin <sp|Q8R0W0|EPIPL_MOUSE>	0	0	0	0	0	0.983527	0	0	0	0	0	0	0.164 ± 0.402	0 ± 0	-100	0.363217	724646	CHAIN 1-6548	-	-->cytoplasm -->cytoskeleton	-->poly(A) RNA binding
Exocyst complex component 3 <sp|Q6KAR6|EXOC3_MOUSE>	0	0	0	0	0.968045	0	0	0	0	0	0	0	0.161 ± 0.395	0 ± 0	-100	0.363217	86454.6	CHAIN 1-755	-->exocyst localization -->exocytosis -->protein transport	-->exocyst -->secretory granule membrane	-->SNARE binding
Ras and Rab interactor-like protein <sp|Q80UW3|RINL_MOUSE>	1.01558	0	0	0	0	0	0	0	0	0	0	0	0.169 ± 0.415	0 ± 0	-100	0.363217			-	-	-
S1 RNA-binding domain-containing protein 1 <sp|Q497V5|SRBD1_MOUSE>	0	0	0	0.996521	0.968045	0	0	0	0	0	0	0	0.327 ± 0.507	0 ± 0	-100	0.174744	114092	CHAIN 1-1015	-->nucleobase-containing compound metabolic process	-	-->RNA binding
Ankyrin repeat, SAM and basic leucine zipper domain-containing protein 1 <sp|Q8VD46|ASZ1_MOUSE>	0	0	1.02276	0	0	0	0	0	0	0	0	0	0.17 ± 0.418	0 ± 0	-100	0.363217			-	-	-
Bardet-Biedl syndrome 7 protein homolog <sp|Q8K2G4|BBS7_MOUSE>	0	0.981065	0	0	0	0	0	0	0	0	0	0	0.164 ± 0.401	0 ± 0	-100	0.363217	80319.5	CHAIN 1-715	-->brain development -->cilium assembly -->eye development -->fat cell differentiation -->heart development -->intracellular transport -->limb development -->nonmotile primary cilium assembly -->palate development -->positive regulation of proteasomal ubiquitin-dependent protein catabolic process -->protein localization -->protein transport -->regulation of transcription from RNA polymerase II pr…	-->axoneme -->BBSome -->centrosome -->ciliary basal body -->ciliary membrane -->cytoplasm -->membrane -->nucleus -->photoreceptor outer segment	-->RNA polymerase II repressing transcription factor binding
E3 ubiquitin-protein ligase DZIP3 <sp|Q7TPV2|DZIP3_MOUSE>	0	0.981065	0	0	0	0	0	0	0	0	0	0	0.164 ± 0.401	0 ± 0	-100	0.363217	138021	CHAIN 1-1204	-->proteasome-mediated ubiquitin-dependent protein catabolic process -->protein polyubiquitination -->protein ubiquitination involved in ubiquitin-dependent protein catabolic process	-->cytoplasm	-->ligase activity -->phosphatase binding -->poly(A) RNA binding -->polyubiquitin binding -->RNA binding -->ubiquitin protein ligase activity -->ubiquitin-protein transferase activity -->zinc ion binding
von Willebrand factor A domain-containing protein 2 <sp|Q70UZ7|VWA2_MOUSE>	0	0	0	0	0	0.983527	0	0	0	0	0	0	0.164 ± 0.402	0 ± 0	-100	0.363217	85638.8	CHAIN 1-791	-->calcium-independent cell-matrix adhesion -->protein homooligomerization -->regulation of insulin receptor signaling pathway	-->basement membrane -->extracellular exosome -->extracellular region -->extracellular space	-->calcium ion binding -->identical protein binding
Ubiquitin-conjugating enzyme E2 variant 3 <sp|Q3U1V6|UEVLD_MOUSE>	0	0	1.02276	0	0	0	0	0	0	0	0	0	0.17 ± 0.418	0 ± 0	-100	0.363217			-	-	-
Caveolae-associated protein 2 <sp|Q63918|CAVN2_MOUSE>	1.01558	0	0	0.996521	0	0.983527	0	0	0	0	0	0	0.499 ± 0.547	0 ± 0	-100	0.0756237	46763.9	CHAIN 1-418	-->positive regulation of transcription from RNA polymerase II promoter	-->cytoplasm -->cytosol -->membrane	-->phosphatidylserine binding
Neurobeachin <sp|Q9EPN1|NBEA_MOUSE>	0	0.981065	0	0	0	0	0	0	0	0	0	0	0.164 ± 0.401	0 ± 0	-100	0.363217	326743	CHAIN 1-2936	-->endosomal transport -->post-Golgi vesicle-mediated transport -->protein localization -->protein targeting	-->cell junction -->cytosol -->endomembrane system -->extrinsic component of membrane -->plasma membrane -->postsynaptic membrane -->trans-Golgi network	-->phospholipid binding -->protein kinase A binding -->protein kinase binding
tRNA (adenine(58)-N(1))-methyltransferase non-catalytic subunit TRM6 <sp|Q8CE96|TRM6_MOUSE>	0	0	1.02276	0	0	0	0	0	0	0	0	0	0.17 ± 0.418	0 ± 0	-100	0.363217	55518.2	CHAIN 1-497	-->tRNA methylation	-->nucleus -->tRNA (m1A) methyltransferase complex	-->poly(A) RNA binding
ARF GTPase-activating protein GIT1 <sp|Q68FF6|GIT1_MOUSE>	0	0	0	0	0.968045	0	0	0	0	0	0	0	0.161 ± 0.395	0 ± 0	-100	0.363217			-	-	-
Paralemmin-3 <sp|A2TJV2|PALM3_MOUSE>	0	0	0	0	0.968045	0	0	0	0	0	0	0	0.161 ± 0.395	0 ± 0	-100	0.363217			-	-	-
D-glucuronyl C5-epimerase <sp|Q9EPS3|GLCE_MOUSE>	0	0	0	0	0.968045	0	0	0	0	0	0	0	0.161 ± 0.395	0 ± 0	-100	0.363217			-	-	-
MYCBP-associated protein <sp|Q5SUV2|MYBPP_MOUSE>	0	0	0	0	0.968045	0	0	0	0	0	0	0	0.161 ± 0.395	0 ± 0	-100	0.363217			-	-	-
Filamin-A-interacting protein 1 <sp|Q9CS72|FLIP1_MOUSE>	0	0	0	0.996521	0	0	0	0	0	0	0	0	0.166 ± 0.407	0 ± 0	-100	0.363217	137599	CHAIN 1-1211	-	-->cytoplasm -->cytoskeleton	-
Sal-like protein 1 <sp|Q9ER74|SALL1_MOUSE>	0	0	0	0	1.93609	0	0	0	0	0	0	0	0.323 ± 0.79	0 ± 0	-100	0.363217			-	-	-
Ras-interacting protein 1 <sp|Q3U0S6|RAIN_MOUSE>	0	0	0	0	0.968045	0	0	0	0	0	0	0	0.161 ± 0.395	0 ± 0	-100	0.363217	103559	CHAIN 1-961	-->angiogenesis -->branching morphogenesis of an epithelial tube -->negative regulation of autophagy -->positive regulation of cell proliferation -->regulation of GTPase activity -->signal transduction -->vasculogenesis	-->Golgi apparatus -->Golgi stack -->perinuclear region of cytoplasm	-->Ras GTPase binding
Transmembrane protein 151A <sp|Q6GQT5|T151A_MOUSE>	0	0	0	0.996521	0	0	0	0	0	0	0	0	0.166 ± 0.407	0 ± 0	-100	0.363217			-	-	-
Uncharacterized protein KIAA0825 homolog <sp|Q3UPC7|K0825_MOUSE>	1.01558	0	0	0	0	0	0	0	0	0	0	0	0.169 ± 0.415	0 ± 0	-100	0.363217			-	-	-
Cadherin-23 <sp|Q99PF4|CAD23_MOUSE>	0	0	1.02276	0	0	0	0	0	0	0	0	0	0.17 ± 0.418	0 ± 0	-100	0.363217	369623	CHAIN 1-3354	-->auditory receptor cell differentiation -->auditory receptor cell stereocilium organization -->calcium-dependent cell-cell adhesion via plasma membrane cell adhesion molecules -->calcium ion transport -->cell adhesion -->equilibrioception -->homophilic cell adhesion via plasma membrane adhesion molecules -->inner ear development -->inner ear morphogenesis -->inner ear receptor stereocilium orga…	-->centrosome -->integral component of membrane -->kinocilium -->photoreceptor inner segment -->plasma membrane -->stereocilium -->stereocilium tip -->synapse	-->calcium ion binding
U4/U6.U5 tri-snRNP-associated protein 1 <sp|Q9Z315|SNUT1_MOUSE>	0	0	0	0.996521	0	0	0	0	0	0	0	0	0.166 ± 0.407	0 ± 0	-100	0.363217			-	-	-
Condensin complex subunit 1 <sp|Q8K2Z4|CND1_MOUSE>	1.01558	0	0	0	0	0	0	0	0	0	0	0	0.169 ± 0.415	0 ± 0	-100	0.363217	155665	CHAIN 1-1392	-->cell division -->chromosome separation -->meiotic chromosome condensation -->mitotic chromosome condensation	-->condensed chromosome -->condensed chromosome, centromeric region -->condensin complex -->cytoplasm -->membrane -->nuclear condensin complex -->nucleoplasm -->pronucleus	-->chromatin binding -->histone binding
Cardiomyopathy-associated protein 5 <sp|Q70KF4|CMYA5_MOUSE>	0	0	0	0.996521	0	0	0	0	0	0	0	0	0.166 ± 0.407	0 ± 0	-100	0.363217			-	-	-
Reelin <sp|Q60841|RELN_MOUSE>	0	0	0	0.996521	0	0	0	0	0	0	0	0	0.166 ± 0.407	0 ± 0	-100	0.363217	387495	CHAIN 1-3461	-->associative learning -->axon guidance -->brain development -->cell adhesion -->cell migration -->cell morphogenesis involved in differentiation -->central nervous system development -->cerebral cortex development -->cerebral cortex tangential migration -->dendrite development -->forebrain development -->glial cell differentiation -->hippocampus development -->lateral motor column neuron migrat…	-->cytoplasm -->dendrite -->extracellular space -->plasma membrane -->proteinaceous extracellular matrix	-->lipoprotein particle receptor binding -->metal ion binding -->serine-type peptidase activity -->very-low-density lipoprotein particle receptor binding
Spectrin beta chain, non-erythrocytic 1 <sp|Q62261|SPTB2_MOUSE>	0	0.981065	0	0	0	0	0	0	0	0	0	0	0.164 ± 0.401	0 ± 0	-100	0.363217	274223	CHAIN 1-2363	-->actin filament capping -->common-partner SMAD protein phosphorylation -->protein targeting to plasma membrane -->SMAD protein import into nucleus	-->axolemma -->cortical cytoskeleton -->cuticular plate -->M band -->membrane -->nucleus -->plasma membrane -->spectrin	-->phospholipid binding -->structural constituent of cytoskeleton
Tubulin alpha chain-like 3 <sp|Q3UX10|TBAL3_MOUSE>	0	0	0	0	0.968045	0	0	0	0	0	0	0	0.161 ± 0.395	0 ± 0	-100	0.363217	49988.1	CHAIN 1-446	-->microtubule-based process -->protein polymerization	-->cytoplasm -->microtubule	-->GTPase activity -->GTP binding -->structural constituent of cytoskeleton
WD repeat-containing protein 20 <sp|Q9D5R2|WDR20_MOUSE>	1.01558	0	0	0	0	0	0	0	0	0	0	0	0.169 ± 0.415	0 ± 0	-100	0.363217			-	-	-
Probable helicase with zinc finger domain <sp|Q6DFV5|HELZ_MOUSE>	0	0	0	0.996521	0	0	0	0	0	0	0	0	0.166 ± 0.407	0 ± 0	-100	0.363217	219880	CHAIN 1-1964	-	-->membrane -->nucleus	-->ATP binding -->helicase activity -->metal ion binding -->poly(A) RNA binding
E3 SUMO-protein ligase RanBP2 <sp|Q9ERU9|RBP2_MOUSE>	0	0	0	0.996521	0	0	0	0	0	0	0	0	0.166 ± 0.407	0 ± 0	-100	0.363217	341121	CHAIN 1-3053	-->mRNA transport -->negative regulation of glucokinase activity -->NLS-bearing protein import into nucleus -->protein folding -->protein sumoylation -->regulation of gluconeogenesis involved in cellular glucose homeostasis -->response to amphetamine	-->cytoplasmic periphery of the nuclear pore complex -->microtubule associated complex -->mitochondrion -->nuclear envelope -->nuclear inclusion body -->nuclear membrane -->nuclear pore -->nuclear pore cytoplasmic filaments -->nuclear pore nuclear basket	-->ligase activity -->peptidyl-prolyl cis-trans isomerase activity -->Ran GTPase binding -->RNA binding -->SUMO transferase activity -->zinc ion binding
Transcription initiation factor TFIID subunit 5 <sp|Q8C092|TAF5_MOUSE>	0	0.981065	0	0	0	0	0	0	0	0	0	0	0.164 ± 0.401	0 ± 0	-100	0.363217			-	-	-
Leucine-rich repeat and fibronectin type-III domain-containing protein 3 <sp|Q8BLY3|LRFN3_MOUSE>	0	0.981065	0	0	0	0	0	0	0	0	0	0	0.164 ± 0.401	0 ± 0	-100	0.363217			-	-	-
Ectopic P granules protein 5 homolog <sp|Q80TA9|EPG5_MOUSE>	0	0	0	0	0.968045	0	0	0	0	0	0	0	0.161 ± 0.395	0 ± 0	-100	0.363217	290801	CHAIN 1-2572	-->autophagic vacuole maturation -->autophagy -->endocytic recycling	-->cytoplasm	-
Leucine zipper putative tumor suppressor 3 <sp|A2AHG0|LZTS3_MOUSE>	0	0	0	0	0.968045	0	0	0	0	0	0	0	0.161 ± 0.395	0 ± 0	-100	0.363217	74985.6	CHAIN 1-700	-	-->cell junction -->cytoplasm -->cytoskeleton -->postsynaptic density -->postsynaptic membrane	-
Melanoma inhibitory activity protein 2 <sp|Q91ZV0|MIA2_MOUSE>	0	0	1.02276	0	0	0	0	0	0	0	0	0	0.17 ± 0.418	0 ± 0	-100	0.363217	57777	CHAIN 1-517	-->cholesterol homeostasis -->triglyceride homeostasis	-->endoplasmic reticulum exit site -->extracellular region	-
DNA polymerase epsilon catalytic subunit A <sp|Q9WVF7|DPOE1_MOUSE>	0	0	0	0	0	0.983527	0	0	0	0	0	0	0.164 ± 0.402	0 ± 0	-100	0.363217	262100	CHAIN 1-2283	-->base-excision repair, gap-filling -->DNA replication -->DNA synthesis involved in DNA repair -->embryonic organ development -->G1/S transition of mitotic cell cycle -->nucleotide-excision repair, DNA gap filling	-->epsilon DNA polymerase complex -->nucleoplasm -->nucleus -->plasma membrane	-->3'-5' exonuclease activity -->4 iron, 4 sulfur cluster binding -->chromatin binding -->DNA binding -->DNA-directed DNA polymerase activity -->nucleotide binding -->zinc ion binding
Scm-like with four MBT domains protein 2 <sp|Q5DTW2|SMBT2_MOUSE>	0	0	0	0.996521	0	0	0	0	0	0	0	0	0.166 ± 0.407	0 ± 0	-100	0.363217	105981	CHAIN 1-938	-->negative regulation of gene expression -->regulation of transcription, DNA-templated	-->aggresome -->intracellular membrane-bounded organelle -->nucleoplasm -->nucleus	-->histone binding
Constitutive coactivator of peroxisome proliferator-activated receptor gamma <sp|Q6RI63|F120B_MOUSE>	0	0	0	0	0.968045	0	0	0	0	0	0	0	0.161 ± 0.395	0 ± 0	-100	0.363217	89313.4	CHAIN 1-786	-->fat cell differentiation -->peroxisome proliferator activated receptor signaling pathway -->regulation of transcription, DNA-templated -->transcription, DNA-templated	-->nucleus	-
Extracellular sulfatase Sulf-2 <sp|Q8CFG0|SULF2_MOUSE>	0	0	0	0.996521	0	0	0	0	0	0	0	0	0.166 ± 0.407	0 ± 0	-100	0.363217			-	-	-
Multiple epidermal growth factor-like domains protein 6 <sp|Q80V70|MEGF6_MOUSE>	1.01558	0	0	0	0	0	0	0	0	0	0	0	0.169 ± 0.415	0 ± 0	-100	0.363217			-	-	-
Multiple PDZ domain protein <sp|Q8VBX6|MPDZ_MOUSE>	0	0.981065	0	0	0	0	0	0	0	0	0	0	0.164 ± 0.401	0 ± 0	-100	0.363217	218711	CHAIN 1-2055	-->cell adhesion	-->apical plasma membrane -->apicolateral plasma membrane -->bicellular tight junction -->cytoplasm -->cytoplasmic vesicle -->dendrite -->postsynaptic density -->postsynaptic membrane -->Schmidt-Lanterman incisure	-->protein C-terminus binding
Leucine-rich repeat serine/threonine-protein kinase 2 <sp|Q5S006|LRRK2_MOUSE>	1.01558	0	0	0	0	0	0	0	0	0	0	0	0.169 ± 0.415	0 ± 0	-100	0.363217	284732	CHAIN 1-2527	-->activation of MAPK activity -->activation of MAPKK activity -->autophagy -->calcium-mediated signaling -->cellular protein localization -->cellular response to dopamine -->cellular response to manganese ion -->cellular response to oxidative stress -->cellular response to starvation -->determination of adult lifespan -->endocytosis -->excitatory postsynaptic potential -->exploration behavior --…	-->amphisome -->autolysosome -->axon -->caveola -->cell junction -->cytoplasm -->cytoplasmic side of mitochondrial outer membrane -->cytoplasmic vesicle -->cytosol -->dendrite -->dendrite cytoplasm -->endoplasmic reticulum -->endosome -->extracellular exosome -->extracellular space	-->actin binding -->ATP binding -->beta-catenin destruction complex binding -->clathrin binding -->glycoprotein binding -->GTPase activator activity -->GTPase activity -->GTP binding -->GTP-dependent protein kinase activity -->identical protein binding -->ion channel binding -->kinase activity -->MAP kinase kinase activity -->peroxidase inhibitor activity -->protein homodimerization activity
Serine-protein kinase ATM <sp|Q62388|ATM_MOUSE>	0	0	0	0.996521	0	0	0	0	0	0	0	0	0.166 ± 0.407	0 ± 0	-100	0.363217	349418	CHAIN 1-3066	-->brain development -->cell cycle arrest -->cellular response to DNA damage stimulus -->cellular response to gamma radiation -->cellular response to nitrosative stress -->determination of adult lifespan -->DNA damage checkpoint -->DNA damage induced protein phosphorylation -->DNA repair -->double-strand break repair via homologous recombination -->establishment of RNA localization to telomere --…	-->chromosome, telomeric region -->cytoplasmic, membrane-bounded vesicle -->DNA repair complex -->nucleoplasm -->nucleus -->spindle	-->1-phosphatidylinositol-3-kinase activity -->ATP binding -->DNA binding -->DNA-dependent protein kinase activity -->kinase activity -->protein complex binding -->protein dimerization activity -->protein kinase activity -->protein N-terminus binding -->protein serine/threonine kinase activity
Cilia- and flagella-associated protein 54 <sp|Q8C6S9|CFA54_MOUSE>	1.01558	0	0	0	0	0	0	0	0	0	0	0	0.169 ± 0.415	0 ± 0	-100	0.363217	353760	CHAIN 1-3106	-->cell differentiation -->cilium assembly -->cilium movement involved in cell motility -->spermatogenesis	-->axoneme -->cytoplasm -->cytoskeleton	-
Rho GTPase-activating protein 17 <sp|Q3UIA2|RHG17_MOUSE>	0	0	0	0	0	0.983527	0	0	0	0	0	0	0.164 ± 0.402	0 ± 0	-100	0.363217	92202.1	CHAIN 1-846	-->actin filament organization -->calcium ion regulated exocytosis -->signal transduction	-->bicellular tight junction -->cytoplasm -->plasma membrane	-->GTPase activator activity
Vacuolar protein sorting-associated protein 13A <sp|Q5H8C4|VP13A_MOUSE>	0	0.981065	0	0	0	0	0	0	0	0	0	0	0.164 ± 0.401	0 ± 0	-100	0.363217	359401	CHAIN 1-3166	-->locomotory behavior -->nervous system development -->protein retention in Golgi apparatus -->protein targeting to vacuole -->social behavior	-->dense core granule -->extrinsic component of membrane	-
Threonine--tRNA ligase 1, cytoplasmic <sp|Q9D0R2|SYTC_MOUSE>	0	0.981065	0	0	0	0	0	0	0	0	0	0	0.164 ± 0.401	0 ± 0	-100	0.363217	83355.9	CHAIN 1-722	-->threonyl-tRNA aminoacylation	-->actin cytoskeleton -->cytoplasm -->extracellular vesicular exosome	-->ATP binding -->threonine-tRNA ligase activity
Mucin-2 (Fragments) <sp|Q80Z19|MUC2_MOUSE>	0	0	0	0	0	0.983527	0	0	0	0	0	0	0.164 ± 0.402	0 ± 0	-100	0.363217			-	-	-
Protein unc-45 homolog B <sp|Q8CGY6|UN45B_MOUSE>	0	0.981065	0	0	0	0	0	0	0	0	0	0	0.164 ± 0.401	0 ± 0	-100	0.363217	103638	CHAIN 1-931	-->cell differentiation -->chaperone-mediated protein folding -->lens development in camera-type eye -->muscle organ development	-->cytoplasm -->cytosol	-->Hsp90 protein binding
Leucine-rich repeat flightless-interacting protein 2 <sp|Q91WK0|LRRF2_MOUSE>	0	0	0	0	0.968045	0	0	0	0	0	0	0	0.161 ± 0.395	0 ± 0	-100	0.363217	47147.7	CHAIN 1-415	-->MyD88-dependent toll-like receptor 4 signaling pathway -->MyD88-independent toll-like receptor signaling pathway -->positive regulation of NF-kappaB transcription factor activity -->positive regulation of tumor necrosis factor secretion -->Wnt signaling pathway	-	-
HEAT repeat-containing protein 5B <sp|Q8C547|HTR5B_MOUSE>	1.01558	0	0	0	0	0	0	0	0	0	0	0	0.169 ± 0.415	0 ± 0	-100	0.363217	224319	CHAIN 1-2070	-	-->extracellular exosome -->membrane	-
Whirlin <sp|Q80VW5|WHRN_MOUSE>	0	0	0	0	0	0.983527	0	0	0	0	0	0	0.164 ± 0.402	0 ± 0	-100	0.363217			-	-	-
[truncated: 52 more rows]

## Sheet: ApoEH-ApoEH-EX-Total
Group-Info	ApoE-H Sample-19(T-SPC= 45249)	ApoE-H Sample-20(T-SPC= 44984)	ApoE-H Sample-21(T-SPC= 44858)	ApoE-H Sample-22(T-SPC= 45635)	ApoE-H Sample-23(T-SPC= 44629)	ApoE-H Sample-24(T-SPC= 47037)	ApoE-H-EX Sample-25(T-SPC= 43525)	ApoE-H-EX Sample-26(T-SPC= 46758)	ApoE-H-EX Sample-27(T-SPC= 45131)	ApoE-H-EX Sample-28(T-SPC= 47324)	ApoE-H-EX Sample-29(T-SPC= 42522)	ApoE-H-EX Sample-30(T-SPC= 43415)
[truncated: 945 more rows]

## Sheet: ApoE-ApoEH-ApoE-Ex-Total
Group-Info	ApoE Sample-13(T-SPC= 43597)	ApoE Sample-14(T-SPC= 45131)	ApoE Sample-15(T-SPC= 43291)	ApoE Sample-16(T-SPC= 44431)	ApoE Sample-17(T-SPC= 45738)	ApoE Sample-18(T-SPC= 45018)	ApoE-H Sample-19(T-SPC= 45249)	ApoE-H Sample-20(T-SPC= 44984)	ApoE-H Sample-21(T-SPC= 44858)	ApoE-H Sample-22(T-SPC= 45635)	ApoE-H Sample-23(T-SPC= 44629)	ApoE-H Sample-24(T-SPC= 47037)	ApoE-H-EX Sample-25(T-SPC= 43525)	ApoE-H-EX Sample-26(T-SPC= 46758)	ApoE-H-EX Sample-27(T-SPC= 45131)	ApoE-H-EX Sample-28(T-SPC= 47324)	ApoE-H-EX Sample-29(T-SPC= 42522)	ApoE-H-EX Sample-30(T-SPC= 43415)
[truncated: 1,155 more rows]
